# Supplementary material for: The Rice Aspartyl-tRNA Synthetase YLC3 Regulates Amino Acid Homeostasis and Chloroplast Development Under Low Temperature
Source: Front Plant Sci. 2022 Mar 4;13:847364. doi: 10.3389/fpls.2022.847364 (PMC9635353; doi:10.3389/fpls.2022.847364)
Supplement: Supplementary Table 1 — 9,212 proteins from quantitative proteomics analysis. [file Table_1.XLSX]

## Sheet: protein_gene_id-2
Query ID	Accession	Ratio	Matched ID	ENTREZID	external_gene_name	Description
LOC_Os01g01120	LOC_Os01g01120.1 protein	0.534205	Os01g0101200			2,3-diketo-5-methylthio-1-phosphopentane phosphatase domain containing protein
LOC_Os01g01130	LOC_Os01g01130.1 protein	1.51293	Os01g0101300	4326461		Similar to MRNA, partial cds, clone: RAFL22-26-L17. (Fragment)
LOC_Os01g01307	LOC_Os01g01307.1 protein	1.78084	Os01g0102700			Translocon-associated beta family protein
LOC_Os01g01340	LOC_Os01g01340.1 protein	0.32508	Os01g0102900	4326442	LIR1	Light-regulated protein, Regulation of light-dependent attachment of LEAF-TYPE FERREDOXIN-NADP+ OXIDOREDUCTASE (LFNR) to the thylakoid membran
LOC_Os01g01420	LOC_Os01g01420.2 protein	1.53395	Os01g0104100		OsCOIN	Similar to protein binding / zinc ion binding
LOC_Os01g01450	LOC_Os01g01450.1 protein	2.09046	Os01g0104400	4326294		Ricin B-related lectin domain containing protein
LOC_Os01g01510	LOC_Os01g01510.1 protein	3.18084	Os01g0104800	4326297		Sas10/Utp3 family protein
LOC_Os01g01640	LOC_Os01g01640.1 protein	1.83861	Os01g0106200	4326147		Similar to RER1A protein (AtRER1A)
LOC_Os01g01670	LOC_Os01g01670.2 protein	3.75207	Os01g0106500	9270828		Conserved hypothetical protein
LOC_Os01g01830	LOC_Os01g01830.1 protein	1.5515	Os01g0108200	4326161	OsPOP1	Similar to Prolyl endopeptidase (EC 3.4.21.26) (Post-proline cleaving enzyme) (PE)
LOC_Os01g02020	LOC_Os01g02020.1 protein	2.28664	Os01g0110400	4326136		Similar to Acetyl-CoA C-acetyltransferase
LOC_Os01g02080	LOC_Os01g02080.1 protein	0.664313	Os01g0111100		OsCYP26-2	Cyclophilin-like domain containing protein
LOC_Os01g02090	LOC_Os01g02090.1 protein	1.6577	Os01g0111200	4326141		Like-Sm ribonucleoprotein (LSM)-related domain domain containing protein
LOC_Os01g02170	LOC_Os01g02170.1 protein	2.28332	Os01g0112050			Non-protein coding transcript
LOC_Os01g02170	LOC_Os01g02170.1 protein	2.28332	Os01g0112100		#N/A	#N/A
LOC_Os01g02880	LOC_Os01g02880.1 protein	2.6974	Os01g0118000	4326074		Similar to Fructose-bisphosphate aldolase (EC 4.1.2.13) (Fragment)
LOC_Os01g02940	LOC_Os01g02940.3 protein	1.56433	Os01g0119050			Non-protein coding transcript
LOC_Os01g02940	LOC_Os01g02940.3 protein	1.56433	Os01g0119100		#N/A	#N/A
LOC_Os01g03070	LOC_Os01g03070.1 protein	1.51511	Os01g0120800	4326038	eIF-3a	Similar to Eukaryotic translation initiation factor 3 subunit 10 (eIF-3 theta) (Eukaryotic translation initiation factor 3 large subunit) (eIF3a)
LOC_Os01g03090	LOC_Os01g03090.1 protein	1.7538	Os01g0121100	4326040		Similar to SLL2
LOC_Os01g03310	LOC_Os01g03310.1 protein	0.104023	Os01g0123900	4325998	RBBI2-2	Similar to Bowman-Birk type proteinase inhibitor (EBI)
LOC_Os01g03320	LOC_Os01g03320.1 protein	0.233241	Os01g0124000	4325999	RBBI2-1	Similar to Bowman Birk trypsin inhibitor
LOC_Os01g03330	LOC_Os01g03330.1 protein	0.412988	Os01g0124100	4326000	RBBI3-2	Proteinase inhibitor I12, Bowman-Birk family protein
LOC_Os01g03360	LOC_Os01g03360.1 protein	2.24092	Os01g0124401	9271230	RBBI3-3	Similar to Bowman-Birk type bran trypsin inhibitor
LOC_Os01g03390	LOC_Os01g03390.1 protein	2.26733	Os01g0124650	9267088	RBBI2-3	Hypothetical conserved gene
LOC_Os01g03510	LOC_Os01g03510.1 protein	1.7854	Os01g0125800	4326007	AIP1	Actin-interacting, WD40-repeat protein, Actin turnove
LOC_Os01g03660	LOC_Os01g03660.2 protein	2.15701	Os01g0127400			Protein of unknown function DUF3326 domain containing protein
LOC_Os01g03660	LOC_Os01g03660.2 protein	2.15701	Os01g0127450		#N/A	#N/A
LOC_Os01g03760	LOC_Os01g03760.1 protein	1.71879	Os01g0128400	4325966		Protein of unknown function DUF2359, TMEM214 domain containing protein
LOC_Os01g03914	LOC_Os01g03914.1 protein	1.80095	Os01g0130000	4325974	OsMTP9	Cation efflux protein family protein
LOC_Os01g03950	LOC_Os01g03950.1 protein	1.77938	Os01g0130400	4325976		Similar to Alpha-xylosidase precursor (Fragment)
LOC_Os01g04190	LOC_Os01g04190.2 protein	1.83239	Os01g0133400		OsPGLCT	Similar to Hexose transporter (Fragment)
LOC_Os01g04200	LOC_Os01g04200.1 protein	1.52044	Os01g0133500	4325805		Beta-lactamase-like domain containing protein
LOC_Os01g04300	LOC_Os01g04300.1 protein	1.61904	Os01g0134900	4325690		(1,4)-beta-xylan endohydrolase, isoenzyme X-II (EC 3.2.1.8) (Fragment)
LOC_Os01g04330	LOC_Os01g04330.1 protein	1.55375	Os01g0135700	4325693	OsCML16	EF-HAND 2 domain containing protein
LOC_Os01g04650	LOC_Os01g04650.1 protein	1.58848	Os01g0139200	4325473		Octicosapeptide/Phox/Bem1p domain containing protein
LOC_Os01g04710	LOC_Os01g04710.1 protein	1.80796	Os01g0140100	4325476		Peptidase A1 domain containing protein
LOC_Os01g04720	LOC_Os01g04720.1 protein	1.87247	Os01g0140400	4325477	PLRRP	Similar to leucine-rich repeat protein-related
LOC_Os01g04730	LOC_Os01g04730.1 protein	1.84183	Os01g0140500		RPL24b	Similar to 60S ribosomal protein L26B
LOC_Os01g04814	LOC_Os01g04814.1 protein	1.66124	Os01g0141100		OsSKD1	Similar to Salt-induced AAA-Type ATPase
LOC_Os01g04910	LOC_Os01g04910.1 protein	1.92634	Os01g0142200	4325487		Kinase binding protein CGI-121 domain containing protein
LOC_Os01g05010	LOC_Os01g05010.1 protein	2.70922	Os01g0143300	4325458		Similar to Glycine-rich protein (Fragment)
LOC_Os01g05070	LOC_Os01g05070.1 protein	2.24401	Os01g0144000			Conserved hypothetical protein
LOC_Os01g05130	LOC_Os01g05130.1 protein	2.7449	Os01g0144600	4325469		Conserved hypothetical protein
LOC_Os01g05140	LOC_Os01g05140.1 protein	1.74218	Os01g0144700	4325470		Conserved hypothetical protein
LOC_Os01g05420	LOC_Os01g05420.1 protein	1.55589	Os01g0147200	4325206	IWS1	IWS1, C-terminal family protein
LOC_Os01g05470	LOC_Os01g05470.1 protein	1.86509	Os01g0147700	4325209		Region of unknown function XH domain containing protein
LOC_Os01g05500	LOC_Os01g05500.1 protein	1.87443	Os01g0148000			Similar to predicted protein
LOC_Os01g05500	LOC_Os01g05500.1 protein	1.87443	Os01g0148050		#N/A	#N/A
LOC_Os01g05540	LOC_Os01g05540.1 protein	2.47359	Os01g0148500	4325216		Protein of unknown function DUF1677, Oryza sativa family protein
LOC_Os01g05560	LOC_Os01g05560.1 protein	2.47811	Os01g0148700	4325217		Protein of unknown function DUF1677, Oryza sativa family protein
LOC_Os01g05610	LOC_Os01g05610.1 protein	1.5421	Os01g0149400			Hypothetical protein
LOC_Os01g05650	LOC_Os01g05650.1 protein	2.21286	Os01g0149800	4325218	OsMT2a	Metallothionein-like protein type 2
LOC_Os01g05670	LOC_Os01g05670.1 protein	1.55105	Os01g0150000	4324516	CER1	Similar to Synaptic glycoprotein SC2
LOC_Os01g05970	LOC_Os01g05970.1 protein	1.54379	Os01g0152900	4324500	OsFbox2	Similar to Histone H2B.1
LOC_Os01g05970	LOC_Os01g05970.1 protein	1.54379	Os01g0153100		#N/A	#N/A
LOC_Os01g06470	LOC_Os01g06470.1 protein	1.65677	Os01g0158000	4324088		Importin alpha-2 subunit
LOC_Os01g06550	LOC_Os01g06550.1 protein	1.82746	Os01g0158900	4324058		Zinc finger, NF-X1-type domain containing protein
LOC_Os01g06600	LOC_Os01g06600.1 protein	1.78952	Os01g0159400	4324062		Similar to Acyl-coenzyme A oxidase 4, peroxisomal (EC 1.3.3.6) (AOX 4) (Short- chain acyl-CoA oxidase) (SAOX) (AtCX4) (G6p) (AtG6)
LOC_Os01g06660	LOC_Os01g06660.1 protein	1.95125	Os01g0160100	4324066		Similar to Pyruvate decarboxylase isozyme 2 (EC 4.1.1.1) (PDC) (Fragment)
LOC_Os01g07070	LOC_Os01g07070.4 protein	1.66404	Os01g0164400			Similar to TAF15b (TBP-ASSOCIATED FACTOR 15b); binding / nucleic acid binding / nucleotide binding / zinc ion binding
LOC_Os01g07080	LOC_Os01g07080.1 protein	5.06464	Os01g0164500	4324413	BIP115	Similar to ATP-dependent RNA helicase-like protein
LOC_Os01g07090	LOC_Os01g07090.1 protein	0.635775	Os01g0164600	4324414	OsPP2C1	Protein phosphatase 2C-related domain containing protein
LOC_Os01g07100	LOC_Os01g07100.1 protein	1.63861	Os01g0164700			Uncharacterised protein family UPF0363 domain containing protein
LOC_Os01g07200	LOC_Os01g07200.1 protein	1.52752	Os01g0166100	4327139		Similar to Ca(2+)-dependent nuclease
LOC_Os01g07300	LOC_Os01g07300.2 protein	1.72454	Os01g0167400	4325182		Similar to Protein synthesis inhibitor II (EC 3.2.2.22) (Ribosome-inactivating protein II) (rRNA N-glycosidase)
LOC_Os01g07340	LOC_Os01g07340.1 protein	1.51218	Os01g0167750	9268026		Pentatricopeptide repeat domain containing protein
LOC_Os01g07382	LOC_Os01g07382.1 protein	1.60312	Os01g0168300	4325190		Conserved hypothetical protein
LOC_Os01g07390	LOC_Os01g07390.1 protein	2.16753	Os01g0168400	4325191		Zinc finger, RING/FYVE/PHD-type domain containing protein
LOC_Os01g07520	LOC_Os01g07520.1 protein	1.69859	Os01g0169900	4325199		Protein of unknown function DUF1421 family protein
LOC_Os01g07740	LOC_Os01g07740.1 protein	2.32941	Os01g0172200	4327645	OsRH14	DNA/RNA helicase, DEAD/DEAH box type, N-terminal domain containing protein
LOC_Os01g07780	LOC_Os01g07780.1 protein	2.35458	Os01g0172800	4327118		Embryo-specific 3 family protein
LOC_Os01g07800	LOC_Os01g07800.2 protein	0.588581	Os01g0173000			Putative thiol-disulphide oxidoreductase DCC domain containing protein
LOC_Os01g07810	LOC_Os01g07810.1 protein	1.96444	Os01g0173100	4327120	OsAlba1	Alba, DNA/RNA-binding protein family protein
LOC_Os01g07870	LOC_Os01g07870.1 protein	1.66359	Os01g0173900	4327122	OsABCC3	Similar to MRP-like ABC transporter
LOC_Os01g07880	LOC_Os01g07880.1 protein	2.97146	Os01g0174000		OsbZIP1	Similar to BZIP transcription factor (Fragment)
LOC_Os01g07910	LOC_Os01g07910.1 protein	1.73342	Os01g0174300	4327126		Flavoprotein pyridine nucleotide cytochrome reductase domain containing protein
LOC_Os01g07950	LOC_Os01g07950.1 protein	1.71505	Os01g0174900	4327130	OsGRX1	Thioredoxin fold domain containing protein
LOC_Os01g07960	LOC_Os01g07960.3 protein	1.93276	Os01g0175000	4327131		Similar to Biostress-resistance-related protein (Fragment)
LOC_Os01g08110	LOC_Os01g08110.1 protein	1.92424	Os01g0176200	4326220		UDP-glucuronosyl/UDP-glucosyltransferase family protein
LOC_Os01g08200	LOC_Os01g08200.1 protein	1.66462	Os01g0177200	4323863		Similar to Ubiquitin-specific protease 14
LOC_Os01g08280	LOC_Os01g08280.1 protein	1.83949	Os01g0178100	4323867		Region of unknown function DUF1767 domain containing protein
LOC_Os01g08350	LOC_Os01g08350.1 protein	1.67435	None		#N/A	#N/A
LOC_Os01g08400	LOC_Os01g08400.1 protein	1.78145	Os01g0179200	4323876		Syntaxin, N-terminal domain containing protein
LOC_Os01g08410	LOC_Os01g08410.1 protein	2.61146	Os01g0179300	4323877	BIP128	Similar to BRI1-KD interacting protein 128 (Fragment)
LOC_Os01g08450	LOC_Os01g08450.1 protein	2.03546	Os01g0179700	4325347	OsRab1C1	Similar to GTP-binding protein YPTM2
LOC_Os01g08560	LOC_Os01g08560.2 protein	1.74817	Os01g0180800	4325355		Heat shock protein Hsp70 family protein
LOC_Os01g08750	LOC_Os01g08750.2 protein	1.50035	Os01g0182832			Hypothetical conserved gene
LOC_Os01g08750	LOC_Os01g08750.2 protein	1.50035	Os01g0182900		#N/A	#N/A
LOC_Os01g08760	LOC_Os01g08760.1 protein	1.87107	Os01g0183000			Similar to GmCK3p (EC 2.7.1.32) (Fragment)
LOC_Os01g08770	LOC_Os01g08770.1 protein	2.37122	Os01g0183100	4325333	OsWD4-5	Cytochrome cd1-nitrite reductase-like, C-terminal haem d1 domain containing protein
LOC_Os01g08860	LOC_Os01g08860.1 protein	1.87808	Os01g0184100		OsHsp18.	Class II small heat shock protein, Positive regulation in both Xoo resistance and heat/salt toleranc
LOC_Os01g08930	LOC_Os01g08930.1 protein	1.73788	Os01g0184500	4325344	OsRH39	DEAD-like helicase, N-terminal domain containing protein
LOC_Os01g09000	LOC_Os01g09000.1 protein	2.82509	Os01g0185200	4325653		Similar to glutaminyl-tRNA synthetase
LOC_Os01g09010	LOC_Os01g09010.1 protein	1.93275	Os01g0185300	4325654	OsAT9	Transferase family protein
LOC_Os01g09200	LOC_Os01g09200.1 protein	1.86692	Os01g0186700	4325661		Similar to Protein kinase GhCLK1 (Fragment)
LOC_Os01g09510	LOC_Os01g09510.4 protein	2.54905	Os01g0191100	4326782		Similar to Acidic ribosomal protein P2a-4 (Fragment)
LOC_Os01g09560	LOC_Os01g09560.1 protein	1.79437	Os01g0191500	4327300		Similar to Mitochondrial processing peptidase
LOC_Os01g09880	LOC_Os01g09880.1 protein	1.50919	Os01g0195400	4327322		Harpin-induced 1 domain containing protein
LOC_Os01g09890	LOC_Os01g09890.1 protein	1.94569	Os01g0195500	4327323		Translation initiation factor SUI1 domain containing protein
LOC_Os01g10020	LOC_Os01g10020.1 protein	1.65915	Os01g0196600			Similar to 260 kDa major acidic fibroblast growth factor-stimulated phosphoprotein (Fragment)
LOC_Os01g10150	LOC_Os01g10150.1 protein	1.60927	Os01g0198200	4327338		Similar to Casein kinase-like protein
LOC_Os01g10290	LOC_Os01g10290.2 protein	2.48584	Os01g0200000	4327346	OsATG3a	Similar to autophagocytosis protein AUT1-like [Oryza sativa (japonica cultivar-group)]
LOC_Os01g10350	LOC_Os01g10350.1 protein	1.76317	Os01g0200500	4327063		MPPN family protein
LOC_Os01g10690	LOC_Os01g10690.1 protein	1.53551	Os01g0204000	4327080		DNA polymerase subunit Cdc27 domain containing protein
LOC_Os01g10820	LOC_Os01g10820.1 protein	2.39333	Os01g0205500	4327087		Similar to 60S ribosomal protein L11-2 (L16). Splice isoform 2
LOC_Os01g10930	LOC_Os01g10930.1 protein	1.87838	Os01g0207200			Similar to Peptide-N4-(N-acetyl-beta-glucosaminyl)asparagine amidase A (EC 3.5.1.52) (PNGase A) (Glycopeptide N-glycosidase) (N-glycanase) [Contains: Peptide-N4-(N-acetyl-beta-glucosaminyl)asparagine amidase A light chain (PNGase A small chain) (PNGase A subunit B); Peptide-N4- (N-acetyl-beta-glucosaminyl)asparagine amidase A heavy chain (PNGase A large chain) (PNGase A subunit A)]
LOC_Os01g10950	LOC_Os01g10950.1 protein	1.59686	Os01g0207400			Similar to peptide-N4-asparagine amidase A
LOC_Os01g11054	LOC_Os01g11054.1 protein	0.47703	Os01g0208700	4325531	PEPC-2	Similar to Phosphoenolpyruvate carboxylase (Fragment)
LOC_Os01g11120	LOC_Os01g11120.1 protein	2.89608	Os01g0209400	4325535		Nucleotide-binding, alpha-beta plait domain containing protein
LOC_Os01g11230	LOC_Os01g11230.1 protein	1.62321	Os01g0210500	4325558		Similar to SOUL-like protein
LOC_Os01g11240	LOC_Os01g11240.1 protein	2.73687	Os01g0210600	4325559		Protein of unknown function DUF538 family protein
LOC_Os01g11370	LOC_Os01g11370.1 protein	1.50726	Os01g0212100	4325567		DEAD-like helicase, N-terminal domain containing protein
LOC_Os01g11550	LOC_Os01g11550.1 protein	2.68547	Os01g0213800	4325252	OsPCF5	Plant-specific transcription factor, miR319 target gen
LOC_Os01g11570	LOC_Os01g11570.1 protein	1.66559	Os01g0214200	4325253	OsGELP1	Esterase, SGNH hydrolase-type, subgroup domain containing protein
LOC_Os01g11620	LOC_Os01g11620.1 protein	2.04592	Os01g0214600	4325257	OsGELP2	Lipase, GDSL domain containing protein
LOC_Os01g11810	LOC_Os01g11810.1 protein	2.16804	Os01g0217000	4324576	OsTBL19	Protein of unknown function DUF231, plant domain containing protein
LOC_Os01g11880	LOC_Os01g11880.1 protein	1.63157	Os01g0217800	4324581	OsDJ-1B	ThiJ/PfpI domain containing protein
LOC_Os01g11900	LOC_Os01g11900.1 protein	1.53774	Os01g0218032	9271145	ROS1A	Putative DNA demethylase, Endosperm developmen
LOC_Os01g11920	LOC_Os01g11920.1 protein	1.68511	Os01g0218200	4324584		Thioredoxin domain 2 containing protein
LOC_Os01g11970	LOC_Os01g11970.1 protein	2.65035	Os01g0219000	4324590		Conserved hypothetical protein
LOC_Os01g12260	LOC_Os01g12260.1 protein	1.73142	Os01g0222500	4326699		Similar to Vacuolar ATP synthase subunit E (EC 3.6.3.14) (V-ATPase E subunit) (Vacuolar proton pump E subunit)
LOC_Os01g12280	LOC_Os01g12280.1 protein	1.51417	Os01g0222700			Protein of unknown function DUF659 domain containing protein
LOC_Os01g12320	LOC_Os01g12320.1 protein	1.59673	Os01g0223200	4326704	OsGELP12	Lipase, GDSL domain containing protein
LOC_Os01g12650	LOC_Os01g12650.1 protein	1.78452	Os01g0226300			Reticulon family protein
LOC_Os01g12670	LOC_Os01g12670.1 protein	1.58169	Os01g0226500	4326744		Conserved hypothetical protein
LOC_Os01g13030	LOC_Os01g13030.2 protein	1.51765	Os01g0231000	4325890	OsIAA3	Similar to Auxin-responsive protein (Aux/IAA) (Fragment)
LOC_Os01g13080	LOC_Os01g13080.1 protein	1.96131	Os01g0231700	4325892		Similar to 60S acidic ribosomal protein P2-B (CaRP2B)
LOC_Os01g13090	LOC_Os01g13090.1 protein	2.15875	Os01g0231800			Similar to cDNA clone:J033025F17, full insert sequence
LOC_Os01g13100	LOC_Os01g13100.1 protein	1.55667	Os01g0231900			K Homology, type 1, subgroup domain containing protein
LOC_Os01g13150	LOC_Os01g13150.1 protein	1.54779	Os01g0232300		TRZ3	Similar to TRZ3 (TRNASE Z 3); 3'-tRNA processing endoribonuclease/ catalytic
LOC_Os01g13160	LOC_Os01g13160.1 protein	1.65319	Os01g0232400			Similar to VHS1 protein (Fragment)
LOC_Os01g13190	LOC_Os01g13190.1 protein	1.56936	Os01g0232700	4324282		Similar to Histidinol dehydrogenase, chloroplast precursor (EC 1.1.1.23) (HDH). Splice isoform 2
LOC_Os01g13200	LOC_Os01g13200.1 protein	1.86866	Os01g0232800			Similar to KOB1
LOC_Os01g13250	LOC_Os01g13250.1 protein	1.66852	Os01g0233400	4324287		Histone H4 acetyltransferase, NuA4 complex, Eaf6 domain containing protein
LOC_Os01g13430	LOC_Os01g13430.1 protein	1.55333	Os01g0235400			Similar to predicted protein
LOC_Os01g13460	LOC_Os01g13460.1 protein	1.55916	Os01g0235700	4327781	OsbHLH8	Similar to BHLH transcription factor (Fragment)
LOC_Os01g13470	LOC_Os01g13470.1 protein	1.65233	Os01g0235800			K Homology domain containing protein
LOC_Os01g13690	LOC_Os01g13690.2 protein	0.342584	Os01g0238500	4326358		Similar to Branched-chain-amino-acid aminotransferase-like protein 3, chloroplast precursor
LOC_Os01g13700	LOC_Os01g13700.1 protein	2.58136	Os01g0238600	4326359		Nucleic acid-binding, OB-fold domain containing protein
LOC_Os01g13730	LOC_Os01g13730.1 protein	1.92938	Os01g0238900		OsWD4-11	Similar to Protein SOF1
LOC_Os01g13760	LOC_Os01g13760.1 protein	2.07396	Os01g0239100	4326364	OsDjB1	Heat shock protein DnaJ family protein
LOC_Os01g14040	LOC_Os01g14040.1 protein	2.10824	Os01g0242500	4327697		D-tyrosyl-tRNA(Tyr) deacylase family protein
LOC_Os01g14410	LOC_Os01g14410.1 protein	5.42007	Os01g0246400	4326757		Similar to Low molecular mass early light-inducible protein HV90, chloroplast precursor (ELIP)
LOC_Os01g14420	LOC_Os01g14420.1 protein	1.63293	Os01g0246500	4326758		Similar to Minus dominance protein
LOC_Os01g14550	LOC_Os01g14550.1 protein	1.93572	Os01g0248300	4327212		Similar to Pathogen-related protein
LOC_Os01g14670	LOC_Os01g14670.1 protein	1.67979	Os01g0249200	4327219	OsGLP1-1	Similar to Nectarin 1 precursor (EC 1.15.1.1) (Superoxide dismutase [Mn])
LOC_Os01g14840	LOC_Os01g14840.1 protein	1.66704	Os01g0251200	4327105		Zinc finger, C2H2-like domain containing protein
LOC_Os01g14920	LOC_Os01g14920.1 protein	2.3909	Os01g0252900		OsZFP	Zinc finger, CCHC-type domain containing protein
LOC_Os01g14950	LOC_Os01g14950.1 protein	2.24716	Os01g0253300	4327117	rImpa1a	Importin alpha-1a subunit
LOC_Os01g15260	LOC_Os01g15260.1 protein	2.63953	Os01g0256400	4327718		Similar to Dynein light chain 1 protein DLC-1 (Fragment)
LOC_Os01g15290	LOC_Os01g15290.2 protein	2.08032	Os01g0256600	4327720		Ribosomal protein L18/L5 domain containing protein
LOC_Os01g15310	LOC_Os01g15310.1 protein	2.19115	Os01g0256900	4326227		Similar to SmX6 protein
LOC_Os01g15350	LOC_Os01g15350.1 protein	2.16378	Os01g0257400	4326230	OsC3H5	Zinc finger, CCCH-type domain containing protein
LOC_Os01g15448	LOC_Os01g15448.1 protein	2.37382	Os01g0258600			Similar to predicted protein
LOC_Os01g15460	LOC_Os01g15460.2 protein	1.70556	Os01g0258700	4326236	OsC3H6	Zinc finger, CCCH-type domain containing protein
LOC_Os01g15600	LOC_Os01g15600.1 protein	1.58663	Os01g0260700	4325116		Similar to PUR ALPHA-1
LOC_Os01g16000	LOC_Os01g16000.1 protein	1.65137	Os01g0264700			Cellular retinaldehyde binding/alpha-tocopherol transport family protein
LOC_Os01g16010	LOC_Os01g16010.2 protein	1.58097	Os01g0264900			Non-protein coding transcript
LOC_Os01g16080	LOC_Os01g16080.1 protein	1.93031	Os01g0265700	4326211		Conserved hypothetical protein
LOC_Os01g16100	LOC_Os01g16100.1 protein	1.56353	Os01g0265900			Similar to translin family protein
LOC_Os01g16110	LOC_Os01g16110.1 protein	2.47775	Os01g0266000	4324370		RNA-binding protein Lupus La domain containing protein
LOC_Os01g16146	LOC_Os01g16146.1 protein	1.57244	Os01g0266500	4324375		Phenazine biosynthesis PhzC/PhzF protein family protein
LOC_Os01g16180	LOC_Os01g16180.2 protein	1.62552	Os01g0267100	4324378		MT-A70 family protein
LOC_Os01g16190	LOC_Os01g16190.1 protein	1.77972	Os01g0267200	4324379	OsRpn11	Similar to 26S proteasome non-ATPase regulatory subunit 14 (26S proteasome regulatory subunit rpn11)
LOC_Os01g16340	LOC_Os01g16340.1 protein	1.62042	Os01g0268900	4326265		Conserved hypothetical protein
LOC_Os01g16350	LOC_Os01g16350.1 protein	1.51506	Os01g0269000	4326266		Similar to Hydroxymethylglutaryl-CoA lyase
LOC_Os01g16430	LOC_Os01g16430.1 protein	1.83029	Os01g0270100	4326272		Similar to Cysteine protease inhibitor
LOC_Os01g16450	LOC_Os01g16450.1 protein	2.02702	Os01g0270300	4326273	prx4	Similar to Cationic peroxidase isozyme 40K precursor
LOC_Os01g16510	LOC_Os01g16510.1 protein	1.78046	Os01g0271000			Conserved hypothetical protein
LOC_Os01g16520	LOC_Os01g16520.1 protein	1.52563	Os01g0271200	4325167		Similar to Glutamyl-tRNA synthetase
LOC_Os01g16550	LOC_Os01g16550.1 protein	3.01591	Os01g0271700			Conserved hypothetical protein
LOC_Os01g16670	LOC_Os01g16670.1 protein	1.92884	Os01g0273300	4325175		BSD domain containing protein
LOC_Os01g16870	LOC_Os01g16870.1 protein	2.08146	Os01g0275600	4324438	OsAGO4a	Similar to Argonaute 4 protein
LOC_Os01g16890	LOC_Os01g16890.1 protein	2.3993	Os01g0276000	4324441		Similar to 60S ribosomal protein L30
LOC_Os01g16910	LOC_Os01g16910.1 protein	1.65533	Os01g0276200		OSVDAC7	Similar to Mitochondrial import receptor subunit TOM40
LOC_Os01g16940	LOC_Os01g16940.1 protein	1.50914	Os01g0276500	4324261		Similar to Histidine biosynthesis bifunctional protein hisIE, chloroplast precursor [Includes: Phosphoribosyl-AMP cyclohydrolase (EC 3.5.4.19) (PRA-CH); Phosphoribosyl-ATP pyrophosphatase (EC 3.6.1.31) (PRA-PH)]
LOC_Os01g16960	LOC_Os01g16960.1 protein	2.35863	Os01g0276700	4324263		Similar to Pyruvate kinase, cytosolic isozyme (EC 2.7.1.40) (PK)
LOC_Os01g16970	LOC_Os01g16970.1 protein	1.70939	Os01g0276800	4324264	Gas2	Glucosidase II beta subunit, Potential switch between programmed cell death and autophag
LOC_Os01g17180	LOC_Os01g17180.1 protein	1.62433	Os01g0279200	4326902		Similar to COP9 signalosome complex subunit 2
LOC_Os01g17190	LOC_Os01g17190.1 protein	1.64663	Os01g0279300	4326903	OsCaM3	Similar to Calmodulin 1 (Fragment)
LOC_Os01g17240	LOC_Os01g17240.1 protein	0.620781	Os01g0279700	4326905	OsPT21	Major facilitator superfamily protein
LOC_Os01g17320	LOC_Os01g17320.1 protein	1.78481	Os01g0280400	4326909		DNA-binding protein
LOC_Os01g17330	LOC_Os01g17330.2 protein	2.34583	Os01g0280500	4326910		Similar to Eukaryotic translation initiation factor 6 (eIF-6) (B4 integrin interactor) (CAB) (p27(BBP)) (B(2)GCN homolog)
LOC_Os01g17430	LOC_Os01g17430.1 protein	1.68934	Os01g0281400	4326915		Coatomer, beta subunit domain containing protein
LOC_Os01g18050	LOC_Os01g18050.1 protein	1.98909	Os01g0282800	4326917	OsTUB1	Similar to Tubulin beta-5 chain (Beta-5 tubulin)
LOC_Os01g18060	LOC_Os01g18060.1 protein	2.11918	Os01g0283000	4327903		Conserved hypothetical protein
LOC_Os01g18070	LOC_Os01g18070.1 protein	1.79579	Os01g0283100	4327904		Similar to Ferripyochelin-binding protein-like
LOC_Os01g18640	LOC_Os01g18640.1 protein	1.68437	Os01g0290100	4325155		Pyridoxal phosphate-dependent transferase, major region, subdomain 1 domain containing protein
LOC_Os01g18660	LOC_Os01g18660.1 protein	1.58062	Os01g0290600			Similar to isopenicillin N epimerase
LOC_Os01g19450	LOC_Os01g19450.1 protein	1.83824	Os01g0300200	4325777		Similar to ATP-citrate lyase subunit B
LOC_Os01g19470	LOC_Os01g19470.1 protein	1.50073	Os01g0300600			Similar to carbohydrate binding
LOC_Os01g19490	LOC_Os01g19490.1 protein	1.92398	Os01g0301000	4325781		Pentatricopeptide repeat domain containing protein
LOC_Os01g19548	LOC_Os01g19548.2 protein	2.05202	Os01g0301700	4325785		Tetratricopeptide-like helical domain containing protein
LOC_Os01g19740	LOC_Os01g19740.1 protein	0.387428	Os01g0303000	4325791		Similar to CP12 (Fragment)
LOC_Os01g19940	LOC_Os01g19940.1 protein	1.51773	Os01g0305200	4323909		Lg106-like family protein
LOC_Os01g20110	LOC_Os01g20110.1 protein	1.50094	Os01g0306800	4327755		Conserved hypothetical protein
LOC_Os01g21070	LOC_Os01g21070.1 protein	2.41285	Os01g0312800	4327286	OsGH9B2	Similar to CEL4=CELLULASE 4 (Fragment)
LOC_Os01g21160	LOC_Os01g21160.1 protein	1.72236	Os01g0314100	4327289		Catalytic domain of components of various dehydrogenase complexes containing protein
LOC_Os01g21180	LOC_Os01g21180.1 protein	2.37168	Os01g0314300	4327290		Uncharacterized domain 2 containing protein
LOC_Os01g21320	LOC_Os01g21320.1 protein	1.69773	Os01g0315800	4327295	OsUXS2	UDP-glucuronic acid decarboxylase (EC 4.1.1.35)
LOC_Os01g21630	LOC_Os01g21630.1 protein	2.76515	Os01g0319000	4327273		Similar to Pectin acetylesterase (Fragment)
LOC_Os01g21850	LOC_Os01g21850.1 protein	1.62151	Os01g0321700			Similar to predicted protein
LOC_Os01g21860	LOC_Os01g21860.1 protein	1.57631	Os01g0321800	4326989		Gas vesicle protein GvpC repeat containing protein
LOC_Os01g21940	LOC_Os01g21940.1 protein	1.66589	Os01g0322800	4326991	OsWD4-13	WD40 repeat-like domain containing protein
LOC_Os01g21960	LOC_Os01g21960.1 protein	1.59788	Os01g0323000	4326992		Similar to Ser Thr specific protein kinase-like protein
LOC_Os01g22010	LOC_Os01g22010.2 protein	1.62947	Os01g0323600	4326996	OsSAM2	Similar to S-adenosylmethionine synthase 2
LOC_Os01g22370	LOC_Os01g22370.1 protein	1.50375	Os01g0327400	4326970	prx16	Similar to Peroxidase (Fragment)
LOC_Os01g22390	LOC_Os01g22390.2 protein	1.69866	Os01g0327600			Conserved hypothetical protein
LOC_Os01g22490	LOC_Os01g22490.1 protein	1.91663	Os01g0328400	4326977	RPS27a	Ubiquitin
LOC_Os01g22500	LOC_Os01g22500.1 protein	1.58671	Os01g0328500	4326978		Bucentaur or craniofacial development family protein
LOC_Os01g22630	LOC_Os01g22630.2 protein	1.76584	Os01g0329800	4326985	IAI1	YT521-B-like protein family protein
LOC_Os01g22660	LOC_Os01g22660.1 protein	1.96299	Os01g0330100		OsGELP15	Similar to Alpha-L-fucosidase 2
LOC_Os01g23620	LOC_Os01g23620.1 protein	1.72363	Os01g0338000	4326797	OsARL1e	Similar to GTP-binding protein SAR1A
LOC_Os01g23640	LOC_Os01g23640.1 protein	1.82679	Os01g0338200	4326798		Mov34/MPN/PAD-1 family protein
LOC_Os01g23740	LOC_Os01g23740.1 protein	2.20461	Os01g0339900	4326806	PDIL2	Thioredoxin domain 2 containing protein
LOC_Os01g24020	LOC_Os01g24020.1 protein	1.7747	Os01g0342800	4326486		Similar to UPF0631 protein
LOC_Os01g24680	LOC_Os01g24680.1 protein	2.21192	Os01g0348600	4326503		Similar to MFP2 (Fatty acid multifunctional protein) (AtMFP2)
LOC_Os01g24690	LOC_Os01g24690.1 protein	1.89969	Os01g0348700	4326469	OsRPL23A	Similar to 60S ribosomal protein L23a (L25)
LOC_Os01g24710	LOC_Os01g24710.1 protein	2.09403	Os01g0348900	4326471	OsJRL	Jacalin-related mannose-binding lectin, Salinity toleranc
LOC_Os01g24750	LOC_Os01g24750.1 protein	1.58216	Os01g0349400	4326473	OsPP5	Similar to Serine/threonine protein phosphatase PP1 (EC 3.1.3.16) (Fragment)
LOC_Os01g24950	LOC_Os01g24950.2 protein	1.6044	Os01g0351300	4326480		Exocyst complex subunit Sec15-like family protein
LOC_Os01g24980	LOC_Os01g24980.1 protein	1.75975	Os01g0351800	4326481		2OG-Fe(II) oxygenase domain containing protein
LOC_Os01g25320	LOC_Os01g25320.1 protein	1.5727	Os01g0355500	4326280	OsDjC5	Hypothetical conserved gene
LOC_Os01g25370	LOC_Os01g25370.1 protein	1.74002	Os01g0355900	4326283		Peptidase C48, SUMO/Sentrin/Ubl1 family protein
LOC_Os01g25484	LOC_Os01g25484.1 protein	0.389456	Os01g0357100	4326014	NiR	Ferredoxin-nitrite reductase, Nitrate reduction (assimilation), Determination of regeneration abilit
LOC_Os01g25610	LOC_Os01g25610.1 protein	1.78714	Os01g0358400	4326022	RPS4	Similar to 40S ribosomal protein S4
LOC_Os01g25820	LOC_Os01g25820.1 protein	1.70427	Os01g0360200	4326027	RBOHB	Similar to Respiratory burst oxidase homolog
LOC_Os01g26020	LOC_Os01g26020.1 protein	2.18019	Os01g0362000			Conserved hypothetical protein
LOC_Os01g26160	LOC_Os01g26160.1 protein	2.12798	Os01g0363900	4325820	OsWAK5	Similar to HASTY
LOC_Os01g27040	LOC_Os01g27040.1 protein	1.5868	Os01g0367900	4325731		Similar to Possible global transcription activator SNF2L1 (SWI/SNF related matrix associated actin dependent regulator of chromatin subfamily A member 1)
LOC_Os01g27160	LOC_Os01g27160.1 protein	1.99188	Os01g0369200	4325736	OsCUL1-3	Component of cullin-RING E3 ubiquitin ligase (CRL) complex, Salt/drought stress response, Cold stress respons
LOC_Os01g27160	LOC_Os01g27160.1 protein	1.99188	Os01g0369366		#N/A	#N/A
LOC_Os01g27210	LOC_Os01g27210.1 protein	3.20787	Os01g0369700	4325704	OsGSTF5	Similar to Glutathione S-transferase GST 8 (EC 2.5.1.18)
LOC_Os01g27520	LOC_Os01g27520.1 protein	2.10481	Os01g0372700	4325717		Similar to Asparaginyl-tRNA synthetase, cytoplasmic 1 (EC 6.1.1.22) (Asparagine-- tRNA ligase 1) (AsnRS 1)
LOC_Os01g27730	LOC_Os01g27730.1 protein	3.17448	Os01g0375000	4325442	Os_F781	GTP1/OBG domain containing protein
LOC_Os01g27750	LOC_Os01g27750.1 protein	1.59118	Os01g0375200	4325444	DHQDT/SDH	Similar to shikimate biosynthesis protein aroDE
LOC_Os01g28500	LOC_Os01g28500.1 protein	2.68525	Os01g0382400	4325424	OsPR1#12	Similar to Pathogenesis-related protein PRB1-2 precursor
LOC_Os01g29330	LOC_Os01g29330.1 protein	0.484875	Os01g0389700	4325228		Protein of unknown function DUF679 family protein
LOC_Os01g31220	LOC_Os01g31220.1 protein	1.98627	Os01g0496900			Conserved hypothetical protein
LOC_Os01g31580	LOC_Os01g31580.1 protein	1.53083	Os01g0500500	9270392		Hypothetical conserved gene
LOC_Os01g31629	LOC_Os01g31629.3 protein	1.56503	Os01g0501000	4324477	OsMED9	Conserved hypothetical protein
LOC_Os01g31690	LOC_Os01g31690.1 protein	0.368281	Os01g0501800	4324479	PsbO	Similar to Photosystem II oxygen-evolving complex protein 1 (Fragment)
LOC_Os01g31980	LOC_Os01g31980.1 protein	1.52058	Os01g0504500	4324490		Similar to Transparent testa 12 protein
LOC_Os01g32184	LOC_Os01g32184.1 protein	1.5325	Os01g0506200	4324040		Tetratricopeptide-like helical domain containing protein
LOC_Os01g32660	LOC_Os01g32660.1 protein	1.68033	Os01g0510100	4324023	OsMKK6	MAP kinase kinase 1
LOC_Os01g32670	LOC_Os01g32670.1 protein	2.33226	Os01g0510200	4324024		Conserved hypothetical protein
LOC_Os01g32780	LOC_Os01g32780.1 protein	1.88416	Os01g0511100	4324029		UspA domain containing protein
LOC_Os01g32790	LOC_Os01g32790.1 protein	1.54563	Os01g0511200	4324030		Conserved hypothetical protein
LOC_Os01g32830	LOC_Os01g32830.1 protein	0.660817	Os01g0511600			Similar to lrgB-like family protein
LOC_Os01g32880	LOC_Os01g32880.1 protein	1.51132	Os01g0512200	4324036		Armadillo-type fold domain containing protein
LOC_Os01g32980	LOC_Os01g32980.1 protein	1.65353	Os01g0513200			Hypothetical conserved gene
LOC_Os01g33020	LOC_Os01g33020.1 protein	1.97222	Os01g0513700	4323988		Similar to trafficking protein particle complex subunit 1
LOC_Os01g33030	LOC_Os01g33030.1 protein	4.23947	Os01g0513800	4323989		Similar to Brix domain containing protein 1 homolog
LOC_Os01g33050	LOC_Os01g33050.2 protein	1.77909	Os01g0514000	4323991		Similar to 50S ribosomal protein L24e
LOC_Os01g33160	LOC_Os01g33160.1 protein	2.34251	Os01g0516200			Similar to Stress-responsive protein
LOC_Os01g34060	LOC_Os01g34060.1 protein	1.983	Os01g0524500	4323963	OsMYBS1	Conserved hypothetical protein
LOC_Os01g34190	LOC_Os01g34190.1 protein	1.90469	Os01g0526100	4323935		Similar to splicing factor 45
LOC_Os01g34200	LOC_Os01g34200.1 protein	1.61129	Os01g0526200	4323936		TRAUB family protein
LOC_Os01g34330	LOC_Os01g34330.1 protein	1.54811	Os01g0527400	4323937		Transcription elongation factor S-II, central region domain containing protein
LOC_Os01g34480	LOC_Os01g34480.1 protein	2.05859	Os01g0528800	4323945	CADL	Similar to Cinnamyl alcohol dehydrogenase
LOC_Os01g34700	LOC_Os01g34700.1 protein	1.83549	Os01g0531500	4327800		Dienelactone hydrolase domain containing protein
LOC_Os01g34780	LOC_Os01g34780.2 protein	1.74737	Os01g0532200			FF domain domain containing protein
LOC_Os01g34860	LOC_Os01g34860.1 protein	1.92005	Os01g0532700			Conserved hypothetical protein
LOC_Os01g35580	LOC_Os01g35580.2 protein	1.95468	Os01g0538000	9272373		Conserved hypothetical protein
LOC_Os01g36080	LOC_Os01g36080.1 protein	1.86146	Os01g0541900		OsPP2C4	Protein kinase, core domain containing protein
LOC_Os01g36600	LOC_Os01g36600.1 protein	1.75498	Os01g0546500	4326881		Pentatricopeptide repeat domain containing protein
LOC_Os01g36640	LOC_Os01g36640.1 protein	1.81075	Os01g0547000	4326180		Similar to LRR19
LOC_Os01g36840	LOC_Os01g36840.1 protein	1.54856	Os01g0549200			Hypothetical conserved gene
LOC_Os01g36860	LOC_Os01g36860.1 protein	1.56902	Os01g0549400	4326190		Similar to RNA helicase-like protein DB10
LOC_Os01g36920	LOC_Os01g36920.2 protein	1.53793	Os01g0550000	4326193	AIP2	DEAD-like helicase, N-terminal domain containing protein
LOC_Os01g36930	LOC_Os01g36930.1 protein	1.67096	Os01g0550100	4326194		Similar to Ubiquitin-specific protease 6
LOC_Os01g36940	LOC_Os01g36940.1 protein	1.94947	Os01g0550200	4326195	OsFbox16	Cyclin-like F-box domain containing protein
LOC_Os01g37130	LOC_Os01g37130.1 protein	0.651131	Os01g0552300	4325851	OsPP2C5	Similar to Protein phosphatase-2C
LOC_Os01g37470	LOC_Os01g37470.1 protein	1.69588	Os01g0555200	4324561		Asp/Glu racemase family protein
LOC_Os01g37480	LOC_Os01g37480.1 protein	1.72253	Os01g0555300	4324562		Conserved hypothetical protein
LOC_Os01g37560	LOC_Os01g37560.2 protein	1.5841	Os01g0556400	4324566	OsDjC9	Heat shock protein DnaJ family protein
LOC_Os01g37800	LOC_Os01g37800.1 protein	1.5729	Os01g0558600	4324675	OsRab1B2	Ras-related protein RIC1
LOC_Os01g37837	LOC_Os01g37837.1 protein	2.08411	Os01g0559100			Similar to Seryl-tRNA synthetase (EC 6.1.1.11) (Serine--tRNA ligase) (SerRS) (Fragment)
LOC_Os01g37960	LOC_Os01g37960.1 protein	1.54968	Os01g0560000	4324686		Similar to Auxin amidohydrolase
LOC_Os01g37980	LOC_Os01g37980.1 protein	1.66299	Os01g0560200	4324687		Similar to Vesicle transport v-SNARE 13 (AtVTI13) (Vesicle transport v-SNARE protein VTI13) (Vesicle soluble NSF attachment protein receptor 13)
LOC_Os01g38229	LOC_Os01g38229.1 protein	1.55616	Os01g0563000	4327922	OsFKBP73	Hypothetical conserved gene
LOC_Os01g38480	LOC_Os01g38480.1 protein	2.0667	Os01g0565600	4327927		Protein of unknown function DUF866, eukaryotic family protein
LOC_Os01g38620	LOC_Os01g38620.1 protein	2.00034	Os01g0566900			Similar to 3'-5' exonuclease domain-containing protein-like
LOC_Os01g38900	LOC_Os01g38900.1 protein	1.54432	Os01g0568400			Hypothetical conserved gene
LOC_Os01g38950	LOC_Os01g38950.1 protein	2.31347	Os01g0570500	4326345		Similar to Dual specificity kinase 1
LOC_Os01g39134	LOC_Os01g39134.1 protein	1.5128	Os01g0572700			Conserved hypothetical protein
LOC_Os01g39250	LOC_Os01g39250.1 protein	1.59309	Os01g0574400	4326310	OsFtsH4	Similar to Cell division protein ftsH (EC 3.4.24.-)
LOC_Os01g39260	LOC_Os01g39260.1 protein	1.60991	Os01g0574500	4326311	OsFtsH5	ATPase, AAA-type, core domain containing protein
LOC_Os01g39290	LOC_Os01g39290.1 protein	2.61114	Os01g0574800	4326313		Harpin-induced 1 domain containing protein
LOC_Os01g39310	LOC_Os01g39310.1 protein	1.60528	Os01g0575000	4326314		Root hair defective 3 GTP-binding family protein
LOC_Os01g39830	LOC_Os01g39830.1 protein	2.14551	Os01g0580200	4324191	OsBgal3	Similar to Beta-galactosidase precursor (EC 3.2.1.23) (Lactase)
LOC_Os01g39860	LOC_Os01g39860.1 protein	1.59916	Os01g0580500	4324194	ACO7	ACC oxidase, Ethylene biosynthesi
LOC_Os01g40110	LOC_Os01g40110.1 protein	3.2295	Os01g0583200	4324202		Zinc finger, C2H2, LYAR-type domain containing protein
LOC_Os01g40250	LOC_Os01g40250.1 protein	2.13041	Os01g0584800			Similar to binding
LOC_Os01g40310	LOC_Os01g40310.1 protein	0.431371	Os01g0585300	4327654		Protein of unknown function DUF1118 family protein
LOC_Os01g40340	LOC_Os01g40340.1 protein	1.89865	Os01g0585700			SIT4 phosphatase-associated protein family protein
LOC_Os01g40420	LOC_Os01g40420.1 protein	1.58533	Os01g0586600		OsCBSX7	Similar to AKIN gamma
LOC_Os01g40470	LOC_Os01g40470.1 protein	1.64989	Os01g0587000	4327660		Similar to Vacuolar ATP synthase subunit d (EC 3.6.3.14) (V-ATPase d subunit) (Vacuolar proton pump d subunit) (V-ATPase 41 KDa accessory protein) (DVA41)
LOC_Os01g40570	LOC_Os01g40570.1 protein	1.7754	Os01g0588200	4327665	OSVDAC3	Voltage-dependent anion channel
LOC_Os01g40690	LOC_Os01g40690.1 protein	3.67169	Os01g0589500	4324451		Uncharacterised conserved protein UCP009193 domain containing protein
LOC_Os01g40710	LOC_Os01g40710.1 protein	0.621305	Os01g0589800			Similar to OHP2
LOC_Os01g40750	LOC_Os01g40750.1 protein	2.84401	Os01g0590200	4324455		Conserved hypothetical protein
LOC_Os01g40860	LOC_Os01g40860.1 protein	2.36422	Os01g0591000	4326375	ALDH1A	Aldehyde/histidinol dehydrogenase domain containing protein
LOC_Os01g40980	LOC_Os01g40980.1 protein	1.75388	Os01g0592900	4326378		Similar to regulator of telomere elongation helicase 1
LOC_Os01g40990	LOC_Os01g40990.2 protein	1.54901	Os01g0593000			Similar to predicted protein
LOC_Os01g41190	LOC_Os01g41190.1 protein	1.87793	Os01g0595100	4326389		Hypothetical conserved gene
LOC_Os01g41550	LOC_Os01g41550.1 protein	1.75282	Os01g0598600	4325964		Peptidase A1 domain containing protein
LOC_Os01g41610	LOC_Os01g41610.2 protein	1.86346	Os01g0600000	4324593		Similar to Copia-like retroelement pol polyprotein
LOC_Os01g41630	LOC_Os01g41630.1 protein	1.5005	Os01g0600200	9270873		Ser/Thr specific protein phosphatase 2A B regulatory subunit beta isoform
LOC_Os01g41640	LOC_Os01g41640.1 protein	2.99247	Os01g0600300	4324595		Conserved hypothetical protein
LOC_Os01g41880	LOC_Os01g41880.1 protein	2.37524	Os01g0603000	4324091		Similar to Nuclear RNA binding protein A
LOC_Os01g42120	LOC_Os01g42120.1 protein	1.60656	Os01g0606050	9268014		Similar to T15D22.3
LOC_Os01g42234	LOC_Os01g42234.2 protein	1.93566	Os01g0607200	4324220	OsBAT1	Amino acid permease subfamily protein
LOC_Os01g42380	LOC_Os01g42380.1 protein	2.61795	Os01g0609300		OsPDR9	Similar to Pleiotropic drug resistance protein 3
LOC_Os01g42460	LOC_Os01g42460.1 protein	1.70221	Os01g0610300	4327732		Bromo adjacent region domain containing protein
LOC_Os01g42470	LOC_Os01g42470.2 protein	1.79443	Os01g0610400	4327733		Acyl-CoA N-acyltransferase domain containing protein
LOC_Os01g42490	LOC_Os01g42490.1 protein	1.60472	Os01g0610600	4327735		Endonuclease/exonuclease/phosphatase domain containing protein
LOC_Os01g42520	LOC_Os01g42520.1 protein	2.77108	Os01g0611000	4325311		Protein of unknown function DUF642 domain containing protein
LOC_Os01g42820	LOC_Os01g42820.2 protein	1.59365	Os01g0614500	4326641		Nucleotide-binding, alpha-beta plait domain containing protein
LOC_Os01g42830	LOC_Os01g42830.1 protein	1.50013	Os01g0614700	4326643	OsABCI13	Similar to Adaptin ear-binding coat-associated protein 1
LOC_Os01g42870	LOC_Os01g42870.1 protein	1.6303	Os01g0615200	4326647	OsAT2	Transferase family protein
LOC_Os01g42880	LOC_Os01g42880.1 protein	1.73146	Os01g0615300	4326648	OsAT1	Transferase family protein
LOC_Os01g42950	LOC_Os01g42950.1 protein	1.83215	Os01g0616100			Similar to kinase family protein
LOC_Os01g42980	LOC_Os01g42980.1 protein	2.07369	Os01g0616500	4326653		Similar to 50S ribosomal protein L22
LOC_Os01g42990	LOC_Os01g42990.1 protein	1.99706	Os01g0616600	4326654		Pentatricopeptide repeat domain containing protein
LOC_Os01g42990	LOC_Os01g42990.1 protein	1.99706	Os01g0616666		#N/A	#N/A
LOC_Os01g43020	LOC_Os01g43020.1 protein	1.97351	Os01g0616900			Ctps protein
LOC_Os01g43030	LOC_Os01g43030.1 protein	1.94971	Os01g0617500	4326606		Tetratricopeptide-like helical domain containing protein
LOC_Os01g43090	LOC_Os01g43090.1 protein	1.52107	Os01g0618100	4326612		Similar to IN2-2 protein
LOC_Os01g43120	LOC_Os01g43120.1 protein	2.06974	Os01g0618400	4326614	OsRH25	Similar to RNA helicase (Fragment)
LOC_Os01g43130	LOC_Os01g43130.1 protein	1.95871	Os01g0618500	4326615	OsRH26	Similar to RNA helicase (Fragment)
LOC_Os01g43160	LOC_Os01g43160.1 protein	1.57524	Os01g0618900		OsPGL31	Similar to Polygalacturonase
LOC_Os01g43170	LOC_Os01g43170.1 protein	1.79973	Os01g0619000	4326619		RNA recognition motif domain domain containing protein
LOC_Os01g43330	LOC_Os01g43330.1 protein	1.59998	Os01g0621300	4326628		Hypothetical conserved gene
LOC_Os01g43360	LOC_Os01g43360.1 protein	1.87883	Os01g0621700	4326631		Myosin tail 2 domain containing protein
LOC_Os01g43410	LOC_Os01g43410.1 protein	1.51161	Os01g0622600	4326638	OsCDPK1	Calcium-dependent protein kinase, Positive regulation of salt and drought tolerance, Negative regulation of seedling growth and seed development, Regulation of pathogenesis-related genes involved in disease resistanc
LOC_Os01g43520	LOC_Os01g43520.2 protein	1.51392	Os01g0624000	4326680		Neutral/alkaline nonlysosomal ceramidase family protein
LOC_Os01g43540	LOC_Os01g43540.1 protein	1.98529	Os01g0624500		OsSgt1	Similar to Sgt1
LOC_Os01g43630	LOC_Os01g43630.1 protein	1.66489	Os01g0626100			Armadillo-like helical domain containing protein
LOC_Os01g43630	LOC_Os01g43630.1 protein	1.66489	Os01g0626200		#N/A	#N/A
LOC_Os01g43710	LOC_Os01g43710.1 protein	2.19587	Os01g0627500	4326657	OsCYP72A18	Cytochrome P450 family protein
LOC_Os01g43740	LOC_Os01g43740.1 protein	4.91705	Os01g0627800	4326659		Similar to Cytochrome P450 monooxygenase CYP72A5 (Fragment)
LOC_Os01g44110	LOC_Os01g44110.1 protein	2.3343	Os01g0631700	4326674		Similar to Ser Thr specific protein kinase-like protein
LOC_Os01g44130	LOC_Os01g44130.1 protein	1.78047	Os01g0631900	4326588		Similar to aspartic proteinase oryzasin-1
LOC_Os01g44230	LOC_Os01g44230.1 protein	1.8407	Os01g0633200	4326595	X1	Similar to X1 (Fragment)
LOC_Os01g44310	LOC_Os01g44310.1 protein	2.13111	Os01g0634300		OsDjC11	Conserved hypothetical protein
LOC_Os01g44394	LOC_Os01g44394.1 protein	1.54074	Os01g0635400	4326570	OsWD4-2	Similar to mRNA-associated protein mrnp 41 (Rae1 protein homolog)
LOC_Os01g45140	LOC_Os01g45140.1 protein	1.59064	Os01g0638600	4326579	UGT73A1	UDP-glucose-dependent glycosyltransferas
LOC_Os01g45190	LOC_Os01g45190.1 protein	1.61894	Os01g0639100	4326580	OsRH2	DEAD box RNA helicase homologous to eukaryotic initiation factor 4AIII (eIF4AIII), Core components of the exon junction complex (EJC), Regulation of plant height, pollen, and seed developmen
LOC_Os01g45274	LOC_Os01g45274.2 protein	0.352871	Os01g0639900	4326583	BETACA1	beta-carbonic anhydrase (EC:4.2.1.1), Carbon assimilation, CO<sub>2</sub>-mediated stomatal pore respons
LOC_Os01g45390	LOC_Os01g45390.2 protein	1.62928	Os01g0641100	4326555		Similar to HD domain containing protein
LOC_Os01g45470	LOC_Os01g45470.1 protein	1.75764	Os01g0642200			Conserved hypothetical protein
LOC_Os01g45640	LOC_Os01g45640.1 protein	4.3224	Os01g0644000	4326569		Twin-arginine translocation pathway signal domain containing protein
LOC_Os01g45910	LOC_Os01g45910.1 protein	1.59664	Os01g0647100	4325928	OsNTT1	ADP/ATP carrier protein family protein
LOC_Os01g46060	LOC_Os01g46060.1 protein	2.97418	Os01g0649000	4326248		WD40 repeat-like domain containing protein
LOC_Os01g46350	LOC_Os01g46350.1 protein	1.96195	Os01g0652100	4325373	OsTBL21	Protein of unknown function DUF231, plant domain containing protein
LOC_Os01g46380	LOC_Os01g46380.1 protein	1.71687	Os01g0652600			Similar to Ketol-acid reductoisomerase, chloroplast precursor (EC 1.1.1.86) (Acetohydroxy-acid reductoisomerase) (Alpha-keto-beta-hydroxylacil reductoisomerase)
LOC_Os01g46400	LOC_Os01g46400.1 protein	1.59336	Os01g0652800	9271197	OsTBL57	Protein of unknown function DUF231, plant domain containing protein
LOC_Os01g46600	LOC_Os01g46600.1 protein	2.0423	Os01g0654400	4324175		Similar to Salt tolerant correlative protein
LOC_Os01g46710	LOC_Os01g46710.1 protein	1.73003	Os01g0655400	4324178		Conserved hypothetical protein
LOC_Os01g46750	LOC_Os01g46750.1 protein	1.56696	Os01g0655800			Similar to ACS-like protein
LOC_Os01g46932	LOC_Os01g46932.1 protein	1.85104	Os01g0658500	4327163		ESCRT-II complex, vps25 subunit domain containing protein
LOC_Os01g46980	LOC_Os01g46980.1 protein	1.64164	Os01g0659200	4327166	v-ATP-E	Similar to Vacuolar ATP synthase subunit E (EC 3.6.3.14) (V-ATPase E subunit) (Vacuolar proton pump E subunit)
LOC_Os01g47080	LOC_Os01g47080.1 protein	3.05468	Os01g0660300			Similar to Pyruvate kinase
LOC_Os01g47256	LOC_Os01g47256.2 protein	2.06891	Os01g0661400	4327851		S1, RNA binding domain containing protein
LOC_Os01g47340	LOC_Os01g47340.1 protein	1.55551	Os01g0662600	4327858	OsISC6	Similar to NifU-like protein
LOC_Os01g47400	LOC_Os01g47400.1 protein	1.94093	Os01g0663300			Similar to (1-4)-beta-mannan endohydrolase-like protein
LOC_Os01g47490	LOC_Os01g47490.3 protein	1.83129	Os01g0664500	4326851		Lg106-like family protein
LOC_Os01g47650	LOC_Os01g47650.1 protein	1.66437	Os01g0666800	4326864		Similar to predicted protein
LOC_Os01g47690	LOC_Os01g47690.1 protein	1.59663	Os01g0667200	4326319	GLYII-1	Mitochondrial sulfur dioxygenase, Abiotic stress respons
LOC_Os01g47760	LOC_Os01g47760.1 protein	1.75195	Os01g0667900	4326324	GRX6	CC-type glutaredoxin, Homeostatic regulation of nitrogen use, Hormone signalin
LOC_Os01g48180	LOC_Os01g48180.1 protein	1.55775	Os01g0672300			Conserved hypothetical protein
LOC_Os01g48200	LOC_Os01g48200.1 protein	1.64829	Os01g0672500		OsGSL2	Glycosyl transferase, family 48 protein
LOC_Os01g48380	LOC_Os01g48380.1 protein	1.54739	Os01g0674700	4325508		Similar to EMB2279 (EMBRYO DEFECTIVE 2279)
LOC_Os01g48420	LOC_Os01g48420.1 protein	1.72314	Os01g0675100	4325511	OsPrxII	Similar to peroxiredoxin
LOC_Os01g48720	LOC_Os01g48720.1 protein	1.75458	Os01g0679000	4325277		RNA polymerase III Rpc82, C -terminal domain containing protein
LOC_Os01g48760	LOC_Os01g48760.1 protein	1.71097	Os01g0679600			Similar to THAP domain-containing protein 4
LOC_Os01g48790	LOC_Os01g48790.1 protein	1.69158	Os01g0679900	4325283		Similar to Ythdf2-prov protein
LOC_Os01g48810	LOC_Os01g48810.1 protein	2.37542	Os01g0680400	4325286		Histone-fold domain containing protein
LOC_Os01g48830	LOC_Os01g48830.1 protein	1.52932	Os01g0680700	4324389		Protein of unknown function DUF1639 family protein
LOC_Os01g48850	LOC_Os01g48850.1 protein	1.5367	Os01g0680900	4324390		Similar to Dopamine beta-monooxygenase
LOC_Os01g48910	LOC_Os01g48910.2 protein	1.66998	Os01g0681150			Hypothetical protein
LOC_Os01g48910	LOC_Os01g48910.2 protein	1.66998	Os01g0681200		#N/A	#N/A
LOC_Os01g49000	LOC_Os01g49000.1 protein	1.83868	Os01g0683100	4324404	OsKTN6	Similar to Katanin p60 ATPase-containing subunit (EC 3.6.4.3) (Katanin p60 subunit) (p60 katanin) (Atp60) (CAD ATPase) (Katanin 1) (BOTERO1 protein) (ECTOPIC ROOT HAIR 3 protein) (FAT ROOT protein) (FRAGILE FIBER 2 protein) (AtAAA1)
LOC_Os01g49120	LOC_Os01g49120.1 protein	1.80552	Os01g0684900	4324144		Multi antimicrobial extrusion protein MatE family protein
LOC_Os01g49250	LOC_Os01g49250.1 protein	1.83655	Os01g0686400			Similar to AR401
LOC_Os01g49290	LOC_Os01g49290.1 protein	2.03869	Os01g0686800	4324115	RACK1	Protein containing the WD-40 repeat, Innate immunut
LOC_Os01g49340	LOC_Os01g49340.1 protein	1.58892	Os01g0687600	4324119		Similar to Arginine/serine-rich coiled coil protein 1
LOC_Os01g49360	LOC_Os01g49360.1 protein	1.61176	Os01g0687800	4327936		FAD linked oxidase, N-terminal domain containing protein
LOC_Os01g49380	LOC_Os01g49380.1 protein	1.60872	Os01g0688200			Similar to hydrolase, alpha/beta fold family protein
LOC_Os01g50100	LOC_Os01g50100.1 protein	2.19308	Os01g0695800		MDR4	Similar to MDR-like ABC transporter
LOC_Os01g50160	LOC_Os01g50160.1 protein	2.13268	Os01g0696600		OsABCB6	Similar to MDR-like ABC transporter
LOC_Os01g50770	LOC_Os01g50770.1 protein	1.75307	Os01g0703600	4324247	SPL28	Clathrin-associated adaptor protein complex 1 medium subunit mu1 (AP1M1), Regulation of vesicular trafficking, Disease resistanc
LOC_Os01g50910	LOC_Os01g50910.1 protein	2.54051	Os01g0705200	4324254	OsLEA14	Late embryogenesis abundant protein repeat containing protein
LOC_Os01g50940	LOC_Os01g50940.1 protein	0.539849	Os01g0705700		OsICE1	Similar to Transcription factor ICE1 (Inducer of CBF expression 1) (Basic helix- loop-helix protein 116) (bHLH116) (AtbHLH116)
LOC_Os01g50960	LOC_Os01g50960.1 protein	1.69234	Os01g0706000	4327671		Similar to RNA polymerase II transcriptional coactivator KELP
LOC_Os01g51020	LOC_Os01g51020.1 protein	2.23093	Os01g0706500	4327674		Ribosomal protein L28e domain containing protein
LOC_Os01g51154	LOC_Os01g51154.1 protein	2.0425	Os01g0708000	4327680		Similar to Single myb histone 4
LOC_Os01g51170	LOC_Os01g51170.1 protein	1.71253	Os01g0708100	4327681		Similar to N-myristoyl transferase (EC 2.3.1.97)
LOC_Os01g51200	LOC_Os01g51200.1 protein	1.88155	Os01g0708400			Non-protein coding transcript
LOC_Os01g51220	LOC_Os01g51220.1 protein	2.0949	Os01g0708600	4327685		TRAPP I complex, Trs31 domain containing protein
LOC_Os01g51300	LOC_Os01g51300.1 protein	1.79648	Os01g0710000	4327826	OsWD4-23	Similar to WD-repeat protein RBAP1
LOC_Os01g51540	LOC_Os01g51540.1 protein	2.02152	Os01g0712700	4325937		CMP/dCMP deaminase, zinc-binding domain containing protein
LOC_Os01g51640	LOC_Os01g51640.1 protein	1.61284	Os01g0714100			Conserved hypothetical protein
LOC_Os01g51700	LOC_Os01g51700.1 protein	1.52502	Os01g0714900	4325946	OsRab7A2	Similar to RAB7A
LOC_Os01g51770	LOC_Os01g51770.1 protein	1.8755	Os01g0715500		OSVDAC4	Similar to voltage-dependent anion channel protein2
LOC_Os01g51840	LOC_Os01g51840.1 protein	2.1061	Os01g0716200	4325581		IQ calmodulin-binding region domain containing protein
LOC_Os01g51870	LOC_Os01g51870.1 protein	2.05275	Os01g0716500	4325584		Methyltransferase type 12 domain containing protein
LOC_Os01g51920	LOC_Os01g51920.1 protein	1.63251	Os01g0717000	4325586		Similar to GmCK1p (EC 2.7.1.32)
LOC_Os01g52050	LOC_Os01g52050.1 protein	1.89029	Os01g0718300	4324691	D61	Receptor serine/threonine kinase, Organ development through controlling cell division and elongatio
LOC_Os01g52214	LOC_Os01g52214.1 protein	1.56398	Os01g0720200			Non-protein coding transcript
LOC_Os01g52214	LOC_Os01g52214.1 protein	1.56398	Os01g0720300		#N/A	#N/A
LOC_Os01g52240	LOC_Os01g52240.1 protein	0.231159	Os01g0720500	4324705	Lhcb1.1	Similar to Type I chlorophyll a/b-binding protein b (Fragment)
LOC_Os01g52250	LOC_Os01g52250.1 protein	1.66302	Os01g0720600	4324654	SSIVA	Similar to Starch synthase IV
LOC_Os01g52390	LOC_Os01g52390.1 protein	1.73124	Os01g0721900	4324661		Similar to Nuclear RNA binding protein B (Fragment)
LOC_Os01g52470	LOC_Os01g52470.1 protein	6.22876	Os01g0723000	4324669		Similar to Elongation factor EF-2 (Fragment)
LOC_Os01g52490	LOC_Os01g52490.1 protein	2.16411	Os01g0723200	4324671	OsRPS24	Similar to 40S ribosomal protein S19-like
LOC_Os01g52500	LOC_Os01g52500.2 protein	1.51523	Os01g0723400	4324717	NADP-ME2	NADP-malic enzyme, Splicing varian
LOC_Os01g52550	LOC_Os01g52550.1 protein	1.65657	Os01g0723800	4324720	OsABCB7	Similar to P-glycoprotein homologue
LOC_Os01g52630	LOC_Os01g52630.1 protein	1.94316	Os01g0725600	4324726		Regulator of chromosome condensation, RCC1 domain containing protein
LOC_Os01g52720	LOC_Os01g52720.1 protein	1.54088	Os01g0727400	4324734		NADH:ubiquinone oxidoreductase complex I intermediate-associated protein 30 domain containing protein
LOC_Os01g52770	LOC_Os01g52770.1 protein	1.77194	Os01g0728100		OsGELP24	Lipase, GDSL domain containing protein
LOC_Os01g53020	LOC_Os01g53020.1 protein	0.477118	Os01g0730500	4324425	OsDjC13	Similar to Ferredoxin (Bacterial type ferredoxin family)
LOC_Os01g53090	LOC_Os01g53090.1 protein	0.576375	Os01g0731100	4324430		Similar to Pathogen-related protein
LOC_Os01g53090	LOC_Os01g53090.1 protein	0.576375	Os01g0731600		#N/A	#N/A
LOC_Os01g53140	LOC_Os01g53140.1 protein	1.55171	Os01g0732100			Conserved hypothetical protein
LOC_Os01g53150	LOC_Os01g53150.1 protein	1.87172	Os01g0732200	4324152		GTP-binding protein, HSR1-related domain containing protein
LOC_Os01g53240	LOC_Os01g53240.1 protein	1.50983	Os01g0733500	4324159	RD22	Similar to Dehydration-induced protein RD22-like protein 1
LOC_Os01g53330	LOC_Os01g53330.1 protein	0.389274	Os01g0734600		OsUGT76E1	UDP-glucuronosyl/UDP-glucosyltransferase family protein
LOC_Os01g53420	LOC_Os01g53420.1 protein	1.6533	Os01g0735900		OsUGT76B1	UDP-glucuronosyl/UDP-glucosyltransferase family protein
LOC_Os01g53520	LOC_Os01g53520.1 protein	1.72067	Os01g0736900	4327874		Reticulon family protein
LOC_Os01g53610	LOC_Os01g53610.1 protein	2.14406	Os01g0737900	4327881		Pentatricopeptide repeat domain containing protein
LOC_Os01g53670	LOC_Os01g53670.1 protein	1.58599	Os01g0738600	4327195		ENTH/VHS domain containing protein
LOC_Os01g53680	LOC_Os01g53680.1 protein	1.75189	Os01g0738800		OsPFK2	Conserved hypothetical protein
LOC_Os01g53700	LOC_Os01g53700.1 protein	1.70774	Os01g0739000	4327198		Similar to Mitochondrial processing peptidase
LOC_Os01g53750	LOC_Os01g53750.1 protein	1.83733	Os01g0739700	4327203		Glycoside hydrolase, family 17 protein
LOC_Os01g53890	LOC_Os01g53890.1 protein	1.60725	Os01g0742000			tRNA/rRNA methyltransferase, SpoU domain containing protein
LOC_Os01g54010	LOC_Os01g54010.1 protein	1.67611	Os01g0743300	4326550		Protease-associated PA domain containing protein
LOC_Os01g54119	LOC_Os01g54119.1 protein	1.62682	Os01g0744400	4326171		Similar to Isoform 2 of Golgin candidate 1
LOC_Os01g54240	LOC_Os01g54240.1 protein	1.86661	Os01g0746200	4326176	NUP85	Nucleoporin, Common symbiosis signaling (SYM) pathwa
LOC_Os01g54400	LOC_Os01g54400.1 protein	1.72776	Os01g0747800	4325545	OsVQ3	VQ domain containing protein
LOC_Os01g54480	LOC_Os01g54480.1 protein	1.6033	Os01g0748600	4325550		Similar to Protein kinase family protein
LOC_Os01g54700	LOC_Os01g54700.1 protein	2.04832	Os01g0750600	4324628		Protein kinase-like domain containing protein
LOC_Os01g54860	LOC_Os01g54860.1 protein	1.68339	Os01g0752200	4324637	NOG1	Enoyl-CoA hydratase/isomerase, Regulation of grain number and the yiel
LOC_Os01g54870	LOC_Os01g54870.1 protein	2.25622	Os01g0752300	4327004		Similar to 60S ribosomal protein L18a-1
LOC_Os01g54880	LOC_Os01g54880.1 protein	1.50031	Os01g0752400			Hypothetical conserved gene
LOC_Os01g54910	LOC_Os01g54910.1 protein	1.6788	Os01g0752700	4327008		Similar to GTP-binding protein
LOC_Os01g54920	LOC_Os01g54920.1 protein	2.79085	Os01g0752800	4327009		Similar to HASP protein-like protein (Fragment)
LOC_Os01g55030	LOC_Os01g55030.1 protein	2.27258	Os01g0754100	4325130		Nucleic acid-binding, OB-fold domain containing protein
LOC_Os01g55050	LOC_Os01g55050.1 protein	1.59841	Os01g0754500	4325133		Protein of unknown function DUF1421 family protein
LOC_Os01g55170	LOC_Os01g55170.1 protein	2.10365	Os01g0756400			Conserved hypothetical protein
LOC_Os01g55190	LOC_Os01g55190.1 protein	2.20973	Os01g0756600	4325142		Protein of unknown function DUF642 family protein
LOC_Os01g55360	LOC_Os01g55360.2 protein	1.53497	Os01g0758400			Similar to Phosphatidate cytidylyltransferase
LOC_Os01g55490	LOC_Os01g55490.1 protein	1.55678	Os01g0759700	9270029		Similar to transcription regulator
LOC_Os01g55540	LOC_Os01g55540.1 protein	2.36333	Os01g0760600	4325621		Aspartate aminotransferase, cytoplasmic (EC 2.6.1.1) (Transaminase A)
LOC_Os01g55570	LOC_Os01g55570.1 protein	0.343695	Os01g0761000	4327018		Conserved hypothetical protein
LOC_Os01g55590	LOC_Os01g55590.1 protein	1.68828	Os01g0761300			Similar to Long-chain-fatty-acid-CoA ligase-like protein
LOC_Os01g55730	LOC_Os01g55730.1 protein	2.39919	Os01g0763000	4327030		Protein of unknown function DUF2039 domain containing protein
LOC_Os01g55750	LOC_Os01g55750.1 protein	1.66085	Os01g0763200	4327032	OsTCP5	TCP family transcription factor, Strigolactone and cytokinin controlled mesocotyl elongation in darknes
LOC_Os01g55770	LOC_Os01g55770.1 protein	1.79489	Os01g0763300	4327033		Conserved hypothetical protein
LOC_Os01g55780	LOC_Os01g55780.1 protein	1.60039	Os01g0763600			PLC-like phosphodiesterase, TIM beta/alpha-barrel domain domain containing protein
LOC_Os01g55830	LOC_Os01g55830.1 protein	2.48102	Os01g0764000	4326887	OsGSTF2	Similar to Glutathione S-transferase I (EC 2.5.1.18) (GST-I) (GST-29) (GST class- phi)
LOC_Os01g55870	LOC_Os01g55870.1 protein	1.54921	Os01g0764400	4326889	CM	Similar to Chorismate mutase, chloroplast precursor (EC 5.4.99.5) (CM-1)
LOC_Os01g56130	LOC_Os01g56130.1 protein	1.87122	Os01g0766900		OsCslC1	Hypothetical protein
LOC_Os01g56330	LOC_Os01g56330.1 protein	1.69794	Os01g0769700	4325600	DRUS2	Receptor-like kinase, Control of reproductive growth and development, Repression of cell deat
LOC_Os01g56360	LOC_Os01g56360.1 protein	1.66758	Os01g0770000	4325602		Uncharacterised protein family UPF0089 domain containing protein
LOC_Os01g56460	LOC_Os01g56460.1 protein	2.05219	Os01g0771100	4324613		Mitochondrial glycoprotein family protein
LOC_Os01g56490	LOC_Os01g56490.1 protein	1.88609	Os01g0771400		OsM2	Similar to CM0545.290.nc protein
LOC_Os01g56520	LOC_Os01g56520.1 protein	1.91635	Os01g0772000	4324620	OsDRB4	Similar to Double-stranded RNA-binding protein 1
LOC_Os01g56580	LOC_Os01g56580.2 protein	1.55984	Os01g0772600	4324710	CK1_CaseinKinase_1a.3	Similar to Casein kinase-like protein
LOC_Os01g56590	LOC_Os01g56590.1 protein	1.85672	Os01g0772700			Armadillo-type fold domain containing protein
LOC_Os01g56600	LOC_Os01g56600.1 protein	1.54008	Os01g0772800	4324712		Similar to Signal recognition particle 54 kDa protein 2 (SRP54)
LOC_Os01g56640	LOC_Os01g56640.3 protein	2.24842	Os01g0773200		JMJ713	Hypothetical conserved gene
LOC_Os01g56780	LOC_Os01g56780.2 protein	1.51077	Os01g0775100			Plus-3 domain containing protein
LOC_Os01g56800	LOC_Os01g56800.1 protein	1.61089	Os01g0775300		OsM1	MATH domain containing protein
LOC_Os01g56880	LOC_Os01g56880.1 protein	2.14895	Os01g0776600	4327894	OsPAP1a	Similar to Purple acid phosphatase (EC 3.1.3.2)
LOC_Os01g56910	LOC_Os01g56910.1 protein	1.55111	Os01g0777000			Vacuolar protein sorting-associated protein 51 domain containing protein
LOC_Os01g56910	LOC_Os01g56910.1 protein	1.55111	Os01g0777101		#N/A	#N/A
LOC_Os01g56969	LOC_Os01g56969.1 protein	1.83121	Os01g0777400			Conserved hypothetical protein
LOC_Os01g57066	LOC_Os01g57066.1 protein	1.59383	Os01g0778700	4326431		Similar to Transmembrane protein 49
LOC_Os01g57073	LOC_Os01g57073.1 protein	1.70549	Os01g0778800	4326432		Peptidase M16, core domain containing protein
LOC_Os01g57100	LOC_Os01g57100.1 protein	1.99548	Os01g0779300	4326435		Concanavalin A-like lectin/glucanase, subgroup domain containing protein
LOC_Os01g57220	LOC_Os01g57220.1 protein	1.74864	Os01g0780500	4327836		SCAMP family protein
LOC_Os01g57220	LOC_Os01g57220.1 protein	1.74864	Os01g0780701		#N/A	#N/A
LOC_Os01g57260	LOC_Os01g57260.1 protein	1.56664	Os01g0781000	4327840		Vacuolar protein sorting-associated, VPS28 family protein
LOC_Os01g57450	LOC_Os01g57450.1 protein	1.92086	Os01g0783500	4327057		Rossmann-like alpha/beta/alpha sandwich fold domain containing protein
LOC_Os01g57460	LOC_Os01g57460.1 protein	1.76896	Os01g0783600	4327058	OsISC22	Similar to Frataxin
LOC_Os01g57630	LOC_Os01g57630.1 protein	2.47733	Os01g0785700	4327045		Pentatricopeptide repeat domain containing protein
LOC_Os01g57710	LOC_Os01g57710.1 protein	1.85002	Os01g0786800			Protein of unknown function DUF81 domain containing protein
LOC_Os01g57854	LOC_Os01g57854.1 protein	1.73652	Os01g0788400	4325861	OsPME6	Similar to Pectinesterase (EC 3.1.1.11) (Fragment)
LOC_Os01g57962	LOC_Os01g57962.1 protein	0.493327	None		#N/A	#N/A
LOC_Os01g58000	LOC_Os01g58000.1 protein	0.473242	None		#N/A	#N/A
LOC_Os01g58080	LOC_Os01g58080.1 protein	1.58221	Os01g0793200	4324129		Pentatricopeptide repeat domain containing protein
LOC_Os01g58380	LOC_Os01g58380.1 protein	1.92638	Os01g0796400	4325632		NAD(P)-binding domain containing protein
LOC_Os01g58620	LOC_Os01g58620.1 protein	1.74395	Os01g0800300	4327955		Immunoglobulin/major histocompatibility complex, conserved site domain containing protein
LOC_Os01g58680	LOC_Os01g58680.1 protein	1.9645	Os01g0801000	4327960		Similar to Apurinic endonuclease-redox protein (DNA-(apurinic or apyrimidinic site) lyase) (EC 4.2.99.18)
LOC_Os01g58690	LOC_Os01g58690.1 protein	1.87924	Os01g0801100	4327961		Similar to Apurinic endonuclease-redox protein (DNA-(apurinic or apyrimidinic site) lyase) (EC 4.2.99.18)
LOC_Os01g58740	LOC_Os01g58740.1 protein	1.62112	Os01g0801600	4327964		Similar to Glycerol-3-phosphate dehydrogenase
LOC_Os01g58750	LOC_Os01g58750.1 protein	1.79865	Os01g0801700	4327965	OsGCD1	Homolog of Arabidopsis GCD1 (GAMETE CELLS DEFECTIVE1), Early embryogenesis and endosperm developmen
LOC_Os01g58890	LOC_Os01g58890.1 protein	1.59854	Os01g0803200	4327535	Oc1*	Cysteine proteinase inhibitor-
LOC_Os01g59100	LOC_Os01g59100.1 protein	2.13383	Os01g0805400	4327545	OsEnS-18	UDP-glucuronosyl/UDP-glucosyltransferase family protein
LOC_Os01g59130	LOC_Os01g59130.2 protein	1.73053	Os01g0805700	4327548		Similar to plectin-related
LOC_Os01g59150	LOC_Os01g59150.1 protein	2.16511	Os01g0805900		OsTUB4	Tubulin beta-2 chain (Beta-2 tubulin)
LOC_Os01g59500	LOC_Os01g59500.1 protein	2.28265	Os01g0810000	4327566		Utp11 family protein
LOC_Os01g59520	LOC_Os01g59520.2 protein	2.00153	Os01g0810200	4327350		Cupin, RmlC-type domain containing protein
LOC_Os01g59600	LOC_Os01g59600.1 protein	1.93175	Os01g0811100	4327357	OsPAG1	Proteasome subunit alpha type 3 (EC 3.4.25.1) (20S proteasome alpha subunit G) (20S proteasome subunit alpha-7)
LOC_Os01g59740	LOC_Os01g59740.1 protein	1.52251	Os01g0812900	4327588		Similar to alphavirus core protein family
LOC_Os01g59930	LOC_Os01g59930.1 protein	1.82087	Os01g0814900	4327480	NFR	Similar to Cytochrome b5 reductase
LOC_Os01g59990	LOC_Os01g59990.2 protein	2.18117	Os01g0815800	4327483	BIP123	Similar to 60S ribosomal protein L24-A (L30A) (RP29) (YL21)
LOC_Os01g60260	LOC_Os01g60260.1 protein	1.64696	Os01g0818300	4327440		K Homology domain containing protein
LOC_Os01g60410	LOC_Os01g60410.3 protein	1.84694	Os01g0819500		OsUBC22	Similar to Ubiquitin-conjugating enzyme E2-17 kDa 11 (EC 6.3.2.19) (Ubiquitin- protein ligase 11) (Ubiquitin carrier protein 11)
LOC_Os01g60650	LOC_Os01g60650.1 protein	1.82379	Os01g0821700	4327612		Similar to Chitin-binding lectin 1 precursor (PL-I)
LOC_Os01g60660	LOC_Os01g60660.1 protein	1.91605	Os01g0821800	4327613		Nucleic acid-binding, OB-fold-like domain containing protein
LOC_Os01g60740	LOC_Os01g60740.1 protein	2.2219	Os01g0822900	4327617	OsLTP1.2	Similar to Lipid transfer protein
LOC_Os01g60770	LOC_Os01g60770.1 protein	1.69112	Os01g0823100	4327568	OsEXP2	Alpha-expansin OsEXPA2
LOC_Os01g60790	LOC_Os01g60790.1 protein	2.28012	Os01g0823300	4327570	OsRPS26	Similar to Ribosomal protein S26
LOC_Os01g61070	LOC_Os01g61070.1 protein	1.7222	Os01g0826000	4327517	OsATX	Heavy metal transport/detoxification protein domain containing protein
LOC_Os01g61150	LOC_Os01g61150.1 protein	1.60227	Os01g0827200			Phox-like domain containing protein
LOC_Os01g61200	LOC_Os01g61200.1 protein	1.7707	Os01g0827700	4327526	OsGELP26	Lipase, GDSL domain containing protein
LOC_Os01g61230	LOC_Os01g61230.1 protein	0.599256	Os01g0828100		OsCCR6	Similar to Cinnamoyl-CoA reductase
LOC_Os01g61320	LOC_Os01g61320.2 protein	2.11918	Os01g0829000			Thioredoxin-like fold domain containing protein
LOC_Os01g61380	LOC_Os01g61380.1 protein	2.60823	Os01g0829800	4327423		Similar to Malate dehydrogenase precursor (EC 1.1.1.37)
LOC_Os01g61500	LOC_Os01g61500.1 protein	1.71862	Os01g0831200	4327432	OsBAG4	Ubiquitin domain containing protein
LOC_Os01g61580	LOC_Os01g61580.1 protein	1.55209	Os01g0832200	4327437		Similar to selT-like protein
LOC_Os01g61670	LOC_Os01g61670.2 protein	1.69791	Os01g0833150			Similar to predicted protein
LOC_Os01g61670	LOC_Os01g61670.2 protein	1.69791	Os01g0833200		#N/A	#N/A
LOC_Os01g61780	LOC_Os01g61780.1 protein	1.57184	Os01g0834200	4327412		Similar to T-cell immune regulator 1 transcript variant 3 (Fragment)
LOC_Os01g61814	LOC_Os01g61814.1 protein	2.16342	Os01g0834500	9266509		Similar to 40S ribosomal protein S23 (S12)
LOC_Os01g61814	LOC_Os01g61814.1 protein	2.16342	Os01g0834600		#N/A	#N/A
LOC_Os01g61830	LOC_Os01g61830.1 protein	1.63332	Os01g0834700	4327416	OsC3H11	Zinc finger, CCCH-type domain containing protein
LOC_Os01g61930	LOC_Os01g61930.1 protein	1.69063	Os01g0836400			Hypothetical conserved gene
LOC_Os01g61970	LOC_Os01g61970.1 protein	2.57019	Os01g0836800	4327461		Transmembrane receptor, eukaryota domain containing protein
LOC_Os01g62040	LOC_Os01g62040.1 protein	1.79114	Os01g0837500	4327368	OsRuvBL1a	Similar to Ruvbl1 protein
LOC_Os01g62160	LOC_Os01g62160.1 protein	1.52948	Os01g0838900	4327379		Trp repressor/replication initiator domain containing protein
LOC_Os01g62210	LOC_Os01g62210.1 protein	1.72171	Os01g0839300	4327382		Similar to 50S ribosomal protein L17
LOC_Os01g62260	LOC_Os01g62260.1 protein	1.55793	Os01g0839900	4327387		Thaumatin, pathogenesis-related family protein
LOC_Os01g62290	LOC_Os01g62290.1 protein	1.59926	Os01g0840100	4327388	OsMed37_1	Heat shock protein Hsp70 family protein
LOC_Os01g62300	LOC_Os01g62300.1 protein	1.56184	Os01g0840200	4327389		HSP20-like chaperone domain containing protein
LOC_Os01g62350	LOC_Os01g62350.1 protein	2.16176	Os01g0840700		OsRPL36.2	Similar to 60S ribosomal protein L36
LOC_Os01g62460	LOC_Os01g62460.2 protein	1.53167	Os01g0842200	4327499		Similar to Scarecrow-like 9 (Fragment)
LOC_Os01g62650	LOC_Os01g62650.1 protein	1.98714	Os01g0844800	4327511		Similar to Pumilio RBD (Fragment)
LOC_Os01g62820	LOC_Os01g62820.1 protein	1.59589	Os01g0846900			Histone-fold domain containing protein
LOC_Os01g62840	LOC_Os01g62840.1 protein	1.5747	Os01g0847200	4327472	OsMPG1	Similar to Mannose-1-phosphate guanyltransferase (EC 2.7.7.13) (ATP-mannose-1- phosphate guanylyltransferase) (GDP-mannose pyrophosphorylase) (NDP- hexose pyrophosphorylase)
LOC_Os01g62870	LOC_Os01g62870.1 protein	1.98591	Os01g0847700	4327476	AKR2	Aldo-keto reductase, Detoxification of reactive aldehydes, Abiotic stress toleranc
LOC_Os01g62880	LOC_Os01g62880.1 protein	1.56824	Os01g0847800		AKR3	Similar to Aldose reductase (EC 1.1.1.21) (AR) (Aldehyde reductase) (20-alpha- hydroxysteroid dehydrogenase) (EC 1.1.1.149) (20-alpha-HSD)
LOC_Os01g63190	LOC_Os01g63190.1 protein	1.5956	Os01g0850700	4324802	OsLAC8	Similar to Laccase-7
LOC_Os01g63210	LOC_Os01g63210.1 protein	2.07352	Os01g0850900	4324804		SOUL haem-binding protein domain containing protein
LOC_Os01g63250	LOC_Os01g63250.1 protein	1.60285	Os01g0851400	4324808		Machado-Joseph disease protein MJD family protein
LOC_Os01g63780	LOC_Os01g63780.1 protein	1.91588	Os01g0856600			Nsp1-like, C-terminal family protein
LOC_Os01g63940	LOC_Os01g63940.1 protein	1.92728	Os01g0858500			Similar to Transcription initiation factor TFIID subunit 12 (Transcription initiation factor TFIID 20/15 kDa subunits) (TAFII-20/TAFII-15) (TAFII20/TAFII15)
LOC_Os01g64090	LOC_Os01g64090.1 protein	2.07001	Os01g0860300	4325065		Similar to Ribosomal protein L1
LOC_Os01g64190	LOC_Os01g64190.1 protein	1.80467	Os01g0861000			Conserved hypothetical protein
LOC_Os01g64280	LOC_Os01g64280.1 protein	1.77156	Os01g0862300	4324745		Similar to Sorting nexin 1
LOC_Os01g64520	LOC_Os01g64520.1 protein	1.58838	Os01g0865100	4324793		Similar to Uricase (Fragment)
LOC_Os01g64660	LOC_Os01g64660.2 protein	0.28221	Os01g0866400		FR	Similar to Fructose-1,6-bisphosphatase (EC 3.1.3.11) (Fragment)
LOC_Os01g64680	LOC_Os01g64680.1 protein	1.72807	Os01g0866600			Similar to bolA-like protein
LOC_Os01g64690	LOC_Os01g64690.1 protein	1.76376	Os01g0866700	4325074		Similar to Sm-like protein
LOC_Os01g64750	LOC_Os01g64750.1 protein	1.92179	Os01g0867600	4325046		Similar to UDP-glucose:sterol glucosyltransferase (EC 2.4.1.173)
LOC_Os01g64770	LOC_Os01g64770.1 protein	1.89334	Os01g0867800			Nucleotide-binding, alpha-beta plait domain containing protein
LOC_Os01g64920	LOC_Os01g64920.1 protein	1.98218	Os01g0869500	4324930		Plant nuclear matrix 1 family protein
LOC_Os01g64960	LOC_Os01g64960.1 protein	0.269205	Os01g0869800	4324933	PSBS1	22-kDa Photosystem II protein, Photoprotectio
LOC_Os01g65090	LOC_Os01g65090.1 protein	1.69907	Os01g0871300	4324941		Pyridoxal phosphate-dependent transferase, major region domain containing protein
LOC_Os01g65220	LOC_Os01g65220.1 protein	1.771	Os01g0872700	4324952	OsXrn3	Zinc finger, CCHC-type domain containing protein
LOC_Os01g65260	LOC_Os01g65260.1 protein	0.59031	Os01g0873100			Similar to Amidophosphoribosyltransferase, chloroplast precursor (EC 2.4.2.14) (Glutamine phosphoribosylpyrophosphate amidotransferase) (ATASE) (GPAT)
LOC_Os01g65380	LOC_Os01g65380.1 protein	1.65937	Os01g0874700	4324771		GOLD domain containing protein
LOC_Os01g65400	LOC_Os01g65400.1 protein	1.87068	Os01g0874800	4324772		Similar to DNA polymerase I
LOC_Os01g65450	LOC_Os01g65450.1 protein	1.87501	Os01g0875400	4324776		Ubiquitin domain containing protein
LOC_Os01g65460	LOC_Os01g65460.2 protein	1.66653	Os01g0875500	4324777	OsBgal4	Similar to Beta-galactosidase (EC 3.2.1.23)
LOC_Os01g65560	LOC_Os01g65560.1 protein	3.43833	None		#N/A	#N/A
LOC_Os01g65580	LOC_Os01g65580.3 protein	1.74847	Os01g0877300			Mitotic checkpoint family protein
LOC_Os01g65670	LOC_Os01g65670.1 protein	2.82733	Os01g0878700	4325094	OsAAP1D	Amino acid transporter, transmembrane domain containing protein
LOC_Os01g65690	LOC_Os01g65690.1 protein	2.14239	Os01g0878900	4324833		Similar to 4,5-DOPA dioxygenase extradiol-like protein
LOC_Os01g65780	LOC_Os01g65780.2 protein	1.66132	Os01g0880200	4324841		Glycosyl transferase, family 8 protein
LOC_Os01g65902	LOC_Os01g65902.1 protein	0.50926	None		#N/A	#N/A
LOC_Os01g66110	LOC_Os01g66110.1 protein	1.87914	Os01g0883900	4325004		Protein of unknown function DUF248, methyltransferase putative family protein
LOC_Os01g66130	LOC_Os01g66130.1 protein	1.59022	Os01g0884400		OsPUB16	Armadillo domain containing protein
LOC_Os01g66170	LOC_Os01g66170.1 protein	0.665376	Os01g0884850			Hypothetical protein
LOC_Os01g66170	LOC_Os01g66170.1 protein	0.665376	Os01g0884900		#N/A	#N/A
LOC_Os01g66240	LOC_Os01g66240.1 protein	1.70099	Os01g0885600	4324884		Alpha/beta hydrolase fold-1 domain containing protein
LOC_Os01g66500	LOC_Os01g66500.1 protein	1.7284	Os01g0888500			Similar to Phosphoribosylformylglycinamidine synthase
LOC_Os01g66560	LOC_Os01g66560.1 protein	1.90014	Os01g0889000	4324904		Tetratricopeptide-like helical domain containing protein
LOC_Os01g66610	LOC_Os01g66610.1 protein	1.50614	Os01g0889900	4324909		Serine/threonine protein kinase-related domain containing protein
LOC_Os01g66720	LOC_Os01g66720.1 protein	1.82087	Os01g0891300			Similar to Allyl alcohol dehydrogenase
LOC_Os01g66940	LOC_Os01g66940.1 protein	1.72918	Os01g0894300	4324962	OsFKI	Similar to Fructokinase 1
LOC_Os01g66980	LOC_Os01g66980.1 protein	0.620158	Os01g0894700	4324965		Trigger factor, ribosome-binding, bacterial domain containing protein
LOC_Os01g67120	LOC_Os01g67120.1 protein	0.393948	Os01g0896500		OsStr1	Rhodanese-like domain containing protein
LOC_Os01g67134	LOC_Os01g67134.1 protein	2.05808	Os01g0896800		RPL5	Ribosomal protein L18/L5 domain containing protein
LOC_Os01g67160	LOC_Os01g67160.1 protein	2.0331	Os01g0897000	9269568	CDKB	Similar to Cyclin-dependent kinase B1-1
LOC_Os01g67210	LOC_Os01g67210.1 protein	1.54699	Os01g0897500		ppr564	Pentatricopeptide repeat domain containing protein
LOC_Os01g67510	LOC_Os01g67510.1 protein	2.71673	Os01g0901200	4325041	RecA	Similar to RecA protein (Fragment)
LOC_Os01g67520	LOC_Os01g67520.1 protein	1.81643	Os01g0901300			Similar to VTC2-like protein
LOC_Os01g67860	LOC_Os01g67860.1 protein	1.97243	Os01g0905800	4325027	AldC-1	Aldolase C-1
LOC_Os01g67880	LOC_Os01g67880.1 protein	1.6816	Os01g0906200			Similar to heat-intolerant 1
LOC_Os01g67960	LOC_Os01g67960.1 protein	1.66831	Os01g0907300	4324979		Hypothetical conserved gene
LOC_Os01g68030	LOC_Os01g68030.1 protein	1.64764	Os01g0908400	4324987		Conserved hypothetical protein
LOC_Os01g68060	LOC_Os01g68060.1 protein	1.88945	Os01g0908700		OsRFP	Similar to Hnrpa2b1-prov protein
LOC_Os01g68120	LOC_Os01g68120.1 protein	1.68768	Os01g0909200	4324864	OsDCL3a	DEAD-like helicase, N-terminal domain containing protein
LOC_Os01g68160	LOC_Os01g68160.1 protein	1.95778	Os01g0909500			Hypothetical conserved gene
LOC_Os01g68300	LOC_Os01g68300.1 protein	2.11818	Os01g0910900	4324873		Conserved hypothetical protein
LOC_Os01g68310	LOC_Os01g68310.1 protein	2.60234	Os01g0911000	4324874		Sas10/Utp3/C1D domain containing protein
LOC_Os01g68320	LOC_Os01g68320.2 protein	1.85764	Os01g0911100		OsRH3	Similar to DEAD box RNA helicase1
LOC_Os01g68324	LOC_Os01g68324.3 protein	1.8353	Os01g0911200	4324876		Ribophorin II family protein
LOC_Os01g68380	LOC_Os01g68380.1 protein	1.51023	Os01g0911800	4324315		Similar to Heavy meromyosin-like protein (Fragment)
LOC_Os01g68390	LOC_Os01g68390.1 protein	1.82402	Os01g0911900	9272193		Similar to Uncharacterized ACR, COG1565 family protein
LOC_Os01g68450	LOC_Os01g68450.1 protein	0.37279	Os01g0912700	4324318		Similar to T23K8.14 protein
LOC_Os01g68710	LOC_Os01g68710.2 protein	2.50427	Os01g0915800	4324328	OsFKBP15-2	Similar to FK506-binding protein 2-2 precursor (EC 5.2.1.8) (Peptidyl-prolyl cis- trans isomerase) (PPIase) (Rotamase) (15 kDa FKBP) (FKBP-15-2)
LOC_Os01g68750	LOC_Os01g68750.1 protein	1.61899	Os01g0916200			Similar to predicted protein
LOC_Os01g68790	LOC_Os01g68790.3 protein	2.26931	Os01g0916600	4324334	OsGRP1	RNA recognition motif, glycine rich protein domain containing protein
LOC_Os01g68940	LOC_Os01g68940.1 protein	2.30742	Os01g0918200	4324359		Similar to Ubiquitin-like protein SMT3
LOC_Os01g68950	LOC_Os01g68950.1 protein	1.69671	Os01g0918300		smt3	Ubiquitin-like protein SMT3
LOC_Os01g69030	LOC_Os01g69030.4 protein	0.4962	Os01g0919400	4324364	SPS1	Sucrose phosphate synthase, Sucrose synthesis in pollen germinatio
LOC_Os01g69060	LOC_Os01g69060.1 protein	0.636539	Os01g0919700	4324367		Alpha/beta hydrolase fold-1 domain containing protein
LOC_Os01g69210	LOC_Os01g69210.1 protein	1.52481	Os01g0921200	4327748	OsMOGS	Mannosyl-oligosaccharide glucosidase, N-glycan formation, Auxin-mediated root developmen
LOC_Os01g69230	LOC_Os01g69230.1 protein	1.69621	Os01g0921400		OsEXO7F1	Conserved hypothetical protein
LOC_Os01g69250	LOC_Os01g69250.1 protein	1.52034	Os01g0921600	4327752		Similar to Mitochondrial import receptor subunit TOM20 (Translocase of outer membrane 20 kDa subunit)
LOC_Os01g69970	LOC_Os01g69970.1 protein	2.81006	Os01g0924300	4327260	OsWD4-29	WD40 repeat-like domain containing protein
LOC_Os01g69990	LOC_Os01g69990.1 protein	1.82611	Os01g0924600			Conserved hypothetical protein
LOC_Os01g70060	LOC_Os01g70060.1 protein	1.59749	Os01g0925000			ENTH/VHS domain containing protein
LOC_Os01g70090	LOC_Os01g70090.1 protein	1.65055	Os01g0925200	4327232		Similar to Enoyl CoA hydratase-like protein
LOC_Os01g70170	LOC_Os01g70170.1 protein	1.83144	Os01g0926300	4327239		Similar to Transaldolase (EC 2.2.1.2)
LOC_Os01g70270	LOC_Os01g70270.1 protein	1.63213	Os01g0927600	4326957	OsARF4	Auxin response factor (ARF) family protein, Transcription factor, Negative regulation of grain size and weigh
LOC_Os01g70320	LOC_Os01g70320.1 protein	1.53316	Os01g0928100	4326960		Similar to expressed protein
LOC_Os01g70330	LOC_Os01g70330.1 protein	2.39584	Os01g0928300			Prefoldin domain containing protein
LOC_Os01g70370	LOC_Os01g70370.1 protein	1.56912	Os01g0928700	4326965	OsLCB2a2	Similar to Serine palmitoyltransferase
LOC_Os01g70400	LOC_Os01g70400.1 protein	0.514446	Os01g0929100	4326936		Conserved hypothetical protein
LOC_Os01g70780	LOC_Os01g70780.1 protein	1.6062	Os01g0934000	4326829	OsATG18c	WD40 repeat-like domain containing protein
LOC_Os01g70800	LOC_Os01g70800.1 protein	1.50706	Os01g0934200			Mitochondrial carrier protein domain containing protein
LOC_Os01g70810	LOC_Os01g70810.1 protein	1.67404	Os01g0934300			Similar to Flowering-time protein isoform alpha
LOC_Os01g70840	LOC_Os01g70840.2 protein	1.66816	Os01g0934700			Alpha/beta hydrolase fold-1 domain containing protein
LOC_Os01g70850	LOC_Os01g70850.1 protein	2.52429	Os01g0934800		Pir7b	Alpha/beta hydrolase fold-1 domain containing protein
LOC_Os01g70960	LOC_Os01g70960.1 protein	1.52186	Os01g0935700	4326795		Similar to Cytochrome c1, heme protein
LOC_Os01g71090	LOC_Os01g71090.1 protein	1.77473	Os01g0937100	4326530		Similar to Xylanase inhibitor precursor (Xylanase inhibitor TAXI-I)
LOC_Os01g71200	LOC_Os01g71200.1 protein	1.95203	Os01g0938200	4326538		Similar to RNA-binding protein BRUNOL5 (Fragment)
LOC_Os01g71230	LOC_Os01g71230.1 protein	2.26375	Os01g0938900	4326505		Similar to Nascent polypeptide-associated complex alpha subunit-like protein 3 (NAC-alpha-like protein 3) (Alpha-NAC-like protein 3)
LOC_Os01g71270	LOC_Os01g71270.1 protein	2.43001	Os01g0939500	4326511		Similar to Eukaryotic peptide chain release factor subunit 1-2 (eRF1-2) (Eukaryotic release factor 1-2
LOC_Os01g71420	LOC_Os01g71420.1 protein	1.71372	Os01g0941800	4326052		Metallophosphoesterase domain containing protein
LOC_Os01g71540	LOC_Os01g71540.1 protein	2.15287	Os01g0942900	9269629		Similar to cDNA clone:J023028M23, full insert sequence
LOC_Os01g71590	LOC_Os01g71590.1 protein	1.77867	Os01g0943800	4326058		Similar to cDNA, clone: J100054L12, full insert sequence
LOC_Os01g71670	LOC_Os01g71670.1 protein	2.43602	Os01g0944700		OsPR2	Similar to Beta-1,3-glucanase precursor
LOC_Os01g71770	LOC_Os01g71770.1 protein	1.69389	Os01g0945800	4325826	HNR27C	Nucleotide-binding, alpha-beta plait domain containing protein
LOC_Os01g72049	LOC_Os01g72049.1 protein	1.8129	Os01g0949060	4325759		Hypothetical conserved gene
LOC_Os01g72080	LOC_Os01g72080.1 protein	3.32081	Os01g0949300	4325760		EF-Hand type domain containing protein
LOC_Os01g72100	LOC_Os01g72100.1 protein	2.03515	Os01g0949500	4325762	OsCML1	Similar to Calmodulin (CaM)
LOC_Os01g72200	LOC_Os01g72200.1 protein	1.53272	Os01g0950800			Essential protein Yae1, N-terminal domain containing protein
LOC_Os01g72205	LOC_Os01g72205.1 protein	0.591069	Os01g0950866	4325770		Similar to proline synthetase-like protein
LOC_Os01g72220	LOC_Os01g72220.1 protein	1.71072	Os01g0951000		OsWD4-32	Conserved hypothetical protein
LOC_Os01g72240	LOC_Os01g72240.1 protein	2.45402	Os01g0951200	4325739	UMPS1	Similar to Orotidine 5'-phosphate decarboxylase (EC 4.1.1.23
LOC_Os01g72250	LOC_Os01g72250.1 protein	1.86184	Os01g0951400	4325740	UMPS2	Similar to Uridine 5'-monophosphate synthase (UMP synthase)
LOC_Os01g72290	LOC_Os01g72290.1 protein	1.78031	Os01g0952000	4325743	GER8	Similar to Germin-like protein 1-3
LOC_Os01g72340	LOC_Os01g72340.1 protein	1.59842	Os01g0952600	4325748		Similar to LacZ (Fragment)
LOC_Os01g72430	LOC_Os01g72430.1 protein	1.50813	Os01g0953600	4325400		NADPH-dependent FMN reductase family protein
LOC_Os01g72690	LOC_Os01g72690.1 protein	1.58875	Os01g0957000	4325416		ATP-NAD kinase, PpnK-type, all-beta domain containing protein
LOC_Os01g72700	LOC_Os01g72700.1 protein	2.60518	Os01g0957100			Protein kinase, core domain containing protein
LOC_Os01g72780	LOC_Os01g72780.1 protein	1.98996	Os01g0957900			Armadillo-type fold domain containing protein
LOC_Os01g72790	LOC_Os01g72790.1 protein	1.5028	Os01g0958000		CDKC	Similar to Cell division control protein 2 homolog 2 (EC 2.7.1.37) (Fragment)
LOC_Os01g73120	LOC_Os01g73120.1 protein	1.97621	Os01g0962200			Similar to Membrane protein
LOC_Os01g73160	LOC_Os01g73160.1 protein	2.49601	Os01g0962600	4324553	RPS1	Similar to 40S ribosomal protein S10-1
LOC_Os01g73170	LOC_Os01g73170.1 protein	2.31267	Os01g0962700	4324554	prx2	Similar to Peroxidase 12 precursor (EC 1.11.1.7) (Atperox P12) (PRXR6) (ATP4a)
LOC_Os01g73310	LOC_Os01g73310.1 protein	1.51929	Os01g0964133	9269066		Similar to Actin
LOC_Os01g73514	LOC_Os01g73514.1 protein	1.76497	Os01g0966000	9270353		Similar to Plasma membrane H+-ATPase (EC 3.6.1.3)
LOC_Os01g73550	LOC_Os01g73550.1 protein	1.66566	Os01g0966300			Similar to Mitochondrial processing peptidase
LOC_Os01g73560	LOC_Os01g73560.1 protein	2.64662	Os01g0966400	4324474		Leucine-rich repeat, SDS22 containing protein
LOC_Os01g73670	LOC_Os01g73670.1 protein	1.81151	Os01g0967800	4324010		Conserved hypothetical protein
LOC_Os01g73690	LOC_Os01g73690.1 protein	0.354077	Os01g0968000			Similar to antiporter/ drug transporter/ transporter
LOC_Os01g73790	LOC_Os01g73790.1 protein	1.81765	Os01g0969100	4323835		NAD(P)-binding domain containing protein
LOC_Os01g73880	LOC_Os01g73880.1 protein	2.0506	Os01g0970400	4323837	p26	Eukaryotic translation initiation factor 4E-1 (eIF4E-1) (eIF-4E-1) (mRNA cap-binding protein) (eIF-4F 25 kDa subunit) (eIF-4F p26 subunit)
LOC_Os01g73900	LOC_Os01g73900.1 protein	1.61897	Os01g0970600		OsRH58	Similar to ATP binding protein
LOC_Os01g73980	LOC_Os01g73980.1 protein	2.46067	Os01g0971400	4323845		Similar to Cysteine proteinase
LOC_Os01g73990	LOC_Os01g73990.1 protein	1.58167	Os01g0971500	4323846		Similar to Cytochrome b5
LOC_Os01g74020	LOC_Os01g74020.1 protein	2.16416	Os01g0971800		OsPCL1	Transcription factor with a GARP DNA-binding domain, Photoperiodic control of flowering time, Clock associated-componen
LOC_Os01g74030	LOC_Os01g74030.1 protein	2.04057	Os01g0971900	4326392		Similar to BPM
LOC_Os01g74190	LOC_Os01g74190.1 protein	2.03392	Os01g0973400	4326401		Similar to radical SAM domain-containing protein
LOC_Os01g74470	LOC_Os01g74470.1 protein	1.99483	Os01g0976100		OsABCB8	ABC transporter-like domain containing protein
LOC_Os01g74520	LOC_Os01g74520.1 protein	1.5531	Os01g0976600	4324310		Similar to Methlytransferase, UbiE/COQ5 family
LOC_Os01g74580	LOC_Os01g74580.1 protein	1.70622	Os01g0977200		OsDjC15	Similar to dnaJ subfamily C member 7
LOC_Os01g74610	LOC_Os01g74610.1 protein	1.65808	Os01g0977600	4327816		Hypothetical conserved gene
LOC_Os02g01010	LOC_Os02g01010.1 protein	2.13212	Os02g0100100	4327971	PDIL1	Thioredoxin domain domain containing protein
LOC_Os02g01030	LOC_Os02g01030.1 protein	1.71668	Os02g0100300	4327973	OsHSP4	Heat shock protein (HSP40), Putative tetratricopeptide repeat(TPR)-containing protein, Growth and development, salt tolerance, abiotic stress toleranc
LOC_Os02g01100	LOC_Os02g01100.1 protein	1.9266	Os02g0101000	4327977	OsATL11	Amino acid transporter, transmembrane domain containing protein
LOC_Os02g01110	LOC_Os02g01110.1 protein	2.00592	Os02g0101100	4327978		Initiation factor 3 family protein
LOC_Os02g01150	LOC_Os02g01150.2 protein	0.608451	Os02g0101500	4327981	OsHPR1	Peroxisomal hydroxypyruvate reductase, NADH-dependent HPR, Photorespiratory metabolis
LOC_Os02g01230	LOC_Os02g01230.2 protein	1.97368	Os02g0102400	4327989		Ribosomal protein S5 family protein
LOC_Os02g01250	LOC_Os02g01250.1 protein	1.9949	Os02g0102700	4327991		Similar to AGL157Cp
LOC_Os02g01280	LOC_Os02g01280.1 protein	2.37506	Os02g0102900	4327993	OsCPn6beta2	Similar to RuBisCO subunit binding-protein beta subunit, chloroplast (60 kDa chaperonin beta subunit) (CPN-60 beta) (Fragment)
LOC_Os02g01340	LOC_Os02g01340.2 protein	0.507528	Os02g0103800	4328000	OsLFNR1	Leaf-type ferredoxin-NADP+-oxidoreductase, Regulation of electron partitioning in the chloroplas
LOC_Os02g01350	LOC_Os02g01350.1 protein	2.20809	Os02g0103900	4328001		U3 small nucleolar RNA-associated protein 6 domain containing protein
LOC_Os02g01380	LOC_Os02g01380.1 protein	2.66659	Os02g0104500			MYB-like domain containing protein
LOC_Os02g01450	LOC_Os02g01450.1 protein	1.57583	Os02g0104800	4328007		Uncharacterised conserved protein UCP022280 domain containing protein
LOC_Os02g01500	LOC_Os02g01500.1 protein	1.55525	Os02g0105200	4328010		Similar to Dihydrolipoamide S-acetyltransferase (EC 2.3.1.12)
LOC_Os02g01520	LOC_Os02g01520.1 protein	1.77112	Os02g0105500	4328013		IQ calmodulin-binding region domain containing protein
LOC_Os02g01790	LOC_Os02g01790.2 protein	1.79696	Os02g0107600	4328027		Protein of unknown function DUF1677, Oryza sativa family protein
LOC_Os02g01870	LOC_Os02g01870.1 protein	1.52159	Os02g0108400	4328030		Protein of unknown function DUF1677, Oryza sativa family protein
LOC_Os02g01920	LOC_Os02g01920.1 protein	1.55301	Os02g0109100	4328034		Similar to diphosphomevalonate decarboxylase
LOC_Os02g01940	LOC_Os02g01940.1 protein	1.57437	Os02g0109400		JMJ719	Transcription factor jumonji/aspartyl beta-hydroxylase domain containing protein
LOC_Os02g01940	LOC_Os02g01940.1 protein	1.57437	Os02g0109501		#N/A	#N/A
LOC_Os02g01960	LOC_Os02g01960.1 protein	1.65024	Os02g0109800	4328037		Tetratricopeptide-like helical domain containing protein
LOC_Os02g02000	LOC_Os02g02000.1 protein	0.441305	Os02g0110200	4328040	HPL3	Fatty acid 13-hydroperoxide lyase (CYP74B), Plant defens
LOC_Os02g02020	LOC_Os02g02020.1 protein	1.85769	Os02g0110400	4328041		Sugar transporter, conserved site domain containing protein
LOC_Os02g02130	LOC_Os02g02130.1 protein	2.59636	Os02g0111700	4328048		Similar to 60S ribosomal protein L37-A (L37-1)
LOC_Os02g02270	LOC_Os02g02270.1 protein	1.54852	Os02g0113800	4328057		Domain of unknown function DUF1618 domain containing protein
LOC_Os02g02320	LOC_Os02g02320.1 protein	1.60654	Os02g0114200	4328060	CBP3	Serine carboxypeptidase III precursor (EC 3.4.16.5)
LOC_Os02g02360	LOC_Os02g02360.1 protein	3.64737	Os02g0114700	4328064		Similar to Phosphorylation regulatory protein HP-10
LOC_Os02g02400	LOC_Os02g02400.1 protein	1.80866	Os02g0115700	4328073	CATA1	Catalase isozyme A (EC 1.11.1.6) (CAT-A)
LOC_Os02g02410	LOC_Os02g02410.1 protein	1.72651	Os02g0115900	4328075	OsBiP1	Endosperm lumenal binding protein
LOC_Os02g02470	LOC_Os02g02470.1 protein	1.66754	Os02g0116500	4328079		Similar to Protochlorophyllide reductase homologue
LOC_Os02g02500	LOC_Os02g02500.1 protein	1.84189	Os02g0116800	4328082	OsREM6.1	Remorin, C-terminal region domain containing protein
LOC_Os02g02510	LOC_Os02g02510.1 protein	1.81348	Os02g0116900	4328083		Similar to 15.9 kDa subunit of RNA polymerase II
LOC_Os02g02520	LOC_Os02g02520.1 protein	0.607801	Os02g0117100	4328085		4-diphosphocytidyl-2C-methyl-D-erythritol synthase, conserved site domain containing protein
LOC_Os02g02690	LOC_Os02g02690.1 protein	2.47396	Os02g0119100		SIP9	Conserved hypothetical protein
LOC_Os02g02700	LOC_Os02g02700.1 protein	1.59942	Os02g0119200			Similar to Adenosine monophosphate binding protein 1 AMPBP1
LOC_Os02g02850	LOC_Os02g02850.1 protein	1.97576	Os02g0120900	4328117		Tetrahydrofolate dehydrogenase/cyclohydrolase family protein
LOC_Os02g02870	LOC_Os02g02870.1 protein	1.57392	Os02g0121100	4328119	OsCSP1	Zinc finger, CCHC-type domain containing protein
LOC_Os02g02880	LOC_Os02g02880.1 protein	2.21812	Os02g0121200	4328120		S-adenosyl-L-methionine dependent methyltransferase, Mett10D, predicted domain containing protein
LOC_Os02g02890	LOC_Os02g02890.1 protein	2.18438	Os02g0121300	4328121	LRT2	Cyclophilin, Peptidyl-prolyl cis-trans isomerase, Auxin signal transduction, Lateral root initiation, Stress toleranc
LOC_Os02g02920	LOC_Os02g02920.1 protein	2.55459	Os02g0121600			Similar to Zinc finger A20 domain-containing stress-associated protein 18
LOC_Os02g02960	LOC_Os02g02960.4 protein	1.95081	Os02g0122000	4328127		Similar to P18
LOC_Os02g03010	LOC_Os02g03010.1 protein	0.484249	Os02g0122500			Conserved hypothetical protein
LOC_Os02g03040	LOC_Os02g03040.1 protein	1.66099	Os02g0122800	4328133		Similar to Arginine/serine-rich splicing factor
LOC_Os02g03090	LOC_Os02g03090.1 protein	1.50667	Os02g0123400			Hypothetical conserved gene
LOC_Os02g03110	LOC_Os02g03110.1 protein	1.54667	Os02g0123600	4328140		Similar to CDP-diacylglycerol--inositol 3-phosphatidyltransferase 1 (EC 2.7.8.11) (Phosphatidylinositol synthase 1) (PtdIns synthase 1) (PI synthase 1) (AtPIS1)
LOC_Os02g03340	LOC_Os02g03340.3 protein	1.62592	Os02g0125800	4328152		Transcription factor Tfb4 family protein
LOC_Os02g03440	LOC_Os02g03440.1 protein	1.52479	Os02g0126700	4328158		Similar to Small nuclear ribonucleoprotein homolog
LOC_Os02g03450	LOC_Os02g03450.1 protein	1.51394	Os02g0126800	4328159		Similar to Golgi SNARE 12 protein (AtGOS12) (Golgi SNAP receptor complex member 1-2)
LOC_Os02g03470	LOC_Os02g03470.1 protein	1.56329	Os02g0127000			Similar to binding
LOC_Os02g03530	LOC_Os02g03530.1 protein	1.76237	Os02g0127600			Pentatricopeptide repeat domain containing protein
LOC_Os02g03540	LOC_Os02g03540.1 protein	1.6172	Os02g0127700	4328168		Similar to Ribose-phosphate pyrophosphokinase
LOC_Os02g03600	LOC_Os02g03600.1 protein	1.65036	Os02g0128400	4328175	OsDjB3	Heat shock protein DnaJ, N-terminal domain containing protein
LOC_Os02g03670	LOC_Os02g03670.1 protein	0.639237	Os02g0129300			Conserved hypothetical protein
LOC_Os02g03730	LOC_Os02g03730.1 protein	1.67642	Os02g0130000	4328187		Similar to SWIb domain-containing protein (Fragment)
LOC_Os02g03820	LOC_Os02g03820.1 protein	1.80262	Os02g0130900	4328192		Ubiquitin-conjugating enzyme E2C-binding protein domain containing protein
LOC_Os02g03890	LOC_Os02g03890.1 protein	2.11114	Os02g0131700	4328199		Similar to RNA binding protein
LOC_Os02g04100	LOC_Os02g04100.1 protein	1.92936	Os02g0133800	4328215	OsPAF1	Proteasome subunit alpha type 1 (EC 3.4.25.1) (20S proteasome alpha subunit F) (20S proteasome subunit alpha-6) (Proteasome component C2)
LOC_Os02g04250	LOC_Os02g04250.1 protein	1.53145	Os02g0135500	4328225		Similar to glycosyltransferase
LOC_Os02g04260	LOC_Os02g04260.1 protein	1.51356	Os02g0135600	4328226		Conserved hypothetical protein
LOC_Os02g04270	LOC_Os02g04270.1 protein	2.75526	Os02g0135700	4328227		DNA polymerase V family protein
LOC_Os02g04320	LOC_Os02g04320.2 protein	1.76056	Os02g0135800	4328228	OsWD4-36	Similar to Sec13-like protein (Fragment)
LOC_Os02g04325	LOC_Os02g04325.1 protein	1.52837	Os02g0135850	107277571		Hypothetical conserved gene
LOC_Os02g04450	LOC_Os02g04450.1 protein	1.75131	Os02g0137100	4328235		Similar to plant-specific domain TIGR01589 family protein
LOC_Os02g04560	LOC_Os02g04560.1 protein	2.6518	Os02g0138200	4328244		RNA recognition motif, RNP-1 domain containing protein
LOC_Os02g04650	LOC_Os02g04650.1 protein	2.13222	Os02g0139100	4328250		Activator of Hsp90 ATPase, N-terminal domain containing protein
LOC_Os02g04660	LOC_Os02g04660.1 protein	2.0392	Os02g0139200	4328251	OsPRMT5	Skb1 methyltransferase family protein
LOC_Os02g04740	LOC_Os02g04740.1 protein	1.60824	Os02g0140300	4328260		Molybdopterin biosynthesis MoaE family protein
LOC_Os02g04840	LOC_Os02g04840.1 protein	1.60458	Os02g0141300	4328266	CAP1	Arabinokinase-Like Protein, Pollen developmen
LOC_Os02g04970	LOC_Os02g04970.1 protein	1.50516	Os02g0142500			Similar to SAR1 (SUPPRESSOR OF AUXIN RESISTANCE1)
LOC_Os02g05330	LOC_Os02g05330.1 protein	2.18765	Os02g0146600	4328286	eIF-4a	Similar to Eukaryotic initiation factor 4A (eIF4A) (eIF-4A)
LOC_Os02g05340	LOC_Os02g05340.1 protein	1.55946	Os02g0146700	4328287		Similar to predicted protein
LOC_Os02g05470	LOC_Os02g05470.1 protein	2.02951	Os02g0148000	4328296	OsCCT3	CCT domain containing protein
LOC_Os02g05660	LOC_Os02g05660.1 protein	1.64102	Os02g0150100		OsRH35A	Similar to ATP-dependent RNA helicase DDX41
LOC_Os02g05680	LOC_Os02g05680.1 protein	1.75334	Os02g0150300			FAD-dependent pyridine nucleotide-disulphide oxidoreductase domain containing protein
LOC_Os02g05810	LOC_Os02g05810.1 protein	2.40878	Os02g0152200	4328324		Protein of unknown function DUF1677, Oryza sativa family protein
LOC_Os02g05840	LOC_Os02g05840.1 protein	1.8819	Os02g0152500	4328327	LC2	Chromatin remodeling factor, Protein containing PHD domain, FNIII domain and VID domain, Positive regulator of flowering, Regulation of leaf angl
LOC_Os02g06340	LOC_Os02g06340.1 protein	1.78238	Os02g0158100	4328363		EF hand domain containing protein
LOC_Os02g06430	LOC_Os02g06430.1 protein	1.58616	Os02g0159200	4328370		Protein of unknown function DUF292, eukaryotic domain containing protein
LOC_Os02g06480	LOC_Os02g06480.1 protein	1.79593	Os02g0159700			Similar to electron transport SCO1/SenC family protein
LOC_Os02g06480	LOC_Os02g06480.1 protein	1.79593	Os02g0159850		#N/A	#N/A
LOC_Os02g06500	LOC_Os02g06500.1 protein	1.6752	Os02g0160000			Similar to Kluyveromyces lactis strain NRRL Y-1140 chromosome B of strain NRRL Y- 1140 of Kluyveromyces lactis
LOC_Os02g06720	LOC_Os02g06720.1 protein	1.54767	Os02g0162700		OsWD4-37	Non-protein coding transcript
LOC_Os02g06720	LOC_Os02g06720.1 protein	1.54767	Os02g0162733		#N/A	#N/A
LOC_Os02g06890	LOC_Os02g06890.1 protein	1.69258	Os02g0164800			Zinc finger, C2H2-type domain containing protein
LOC_Os02g06920	LOC_Os02g06920.2 protein	1.52336	Os02g0165000	4328407		Zinc finger, RING/FYVE/PHD-type domain containing protein
LOC_Os02g07040	LOC_Os02g07040.1 protein	1.59115	Os02g0167000	4328417		Similar to holocarboxylase synthetase 1
LOC_Os02g07070	LOC_Os02g07070.1 protein	1.56933	Os02g0167500			RNA recognition motif domain domain containing protein
LOC_Os02g07120	LOC_Os02g07120.1 protein	1.74996	Os02g0167700	4328423		Armadillo-like helical domain containing protein
LOC_Os02g07160	LOC_Os02g07160.1 protein	1.66829	Os02g0168100		OsHPPD	Similar to 4-hydroxyphenylpyruvate dioxygenase
LOC_Os02g07240	LOC_Os02g07240.1 protein	2.29852	Os02g0168900	4328433		Ribonuclease H2, subunit C domain containing protein
LOC_Os02g07260	LOC_Os02g07260.1 protein	2.14635	Os02g0169300	4328435	OsPGK2	Similar to Phosphoglycerate kinase, cytosolic (EC 2.7.2.3)
LOC_Os02g07350	LOC_Os02g07350.1 protein	0.650599	Os02g0169900	4328439	OsIMP-2	Inositol monophosphatase family protein
LOC_Os02g07420	LOC_Os02g07420.1 protein	1.79033	Os02g0170200	4328442		Similar to splicing factor, arginine/serine-rich 12
LOC_Os02g07450	LOC_Os02g07450.2 protein	1.96563	Os02g0170500	4328444	OsHAP5A	Histone-fold domain containing protein
LOC_Os02g07490	LOC_Os02g07490.1 protein	2.89206	Os02g0171100	4328446		Similar to Glyceraldehyde-3-phosphate dehydrogenase (EC 1.2.1.12) (GAPDH)
LOC_Os02g07740	LOC_Os02g07740.1 protein	1.64187	Os02g0173700			Similar to RNA binding
LOC_Os02g07760	LOC_Os02g07760.2 protein	1.55366	Os02g0173900		OsALDH5F1	Similar to SSADH
LOC_Os02g07870	LOC_Os02g07870.1 protein	1.74641	Os02g0175400	4328470	VHA-A2	Similar to Vacuolar H(+)-ATPase subunit A (Fragment)
LOC_Os02g07920	LOC_Os02g07920.1 protein	1.50716	Os02g0175900	4328475		Mitotic checkpoint protein PRCC, C-terminal domain containing protein
LOC_Os02g07960	LOC_Os02g07960.4 protein	1.54259	Os02g0176100	4328477		Similar to predicted protein
LOC_Os02g07980	LOC_Os02g07980.1 protein	1.53555	Os02g0176400	4328479		Uncharacterised protein family UPF0414 domain containing protein
LOC_Os02g08010	LOC_Os02g08010.1 protein	1.61294	Os02g0176650			Non-protein coding transcript
LOC_Os02g08010	LOC_Os02g08010.1 protein	1.61294	Os02g0176700		#N/A	#N/A
LOC_Os02g08190	LOC_Os02g08190.1 protein	1.77128	Os02g0178500	4328493		Similar to DEM2
LOC_Os02g08300	LOC_Os02g08300.1 protein	1.96731	Os02g0179300	4328500	RAD23	Similar to RAD23 protein, isoform II
LOC_Os02g08350	LOC_Os02g08350.1 protein	2.06231	Os02g0179800	4328503		Integrase, N-terminal zinc-binding domain domain containing protein
LOC_Os02g08360	LOC_Os02g08360.1 protein	1.70565	Os02g0179900			Similar to Negative elongation factor E (NELF-E) (RD protein). Splice isoform 2
LOC_Os02g08364	LOC_Os02g08364.1 protein	1.65325	Os02g0180000	4328505	OsPP2C11	Similar to Protein phosphatase type-2C
LOC_Os02g08370	LOC_Os02g08370.1 protein	1.56506	Os02g0180100	4328506		Peptidase C12, ubiquitin carboxyl-terminal hydrolase 1 family protein
LOC_Os02g08410	LOC_Os02g08410.1 protein	1.68282	Os02g0180500	4328508		Similar to Chorismate mutase CM2 (EC 5.4.99.5) (Chorimate mutase)
LOC_Os02g08480	LOC_Os02g08480.1 protein	1.54837	Os02g0181800			Similar to Ubiquitin fusion degradation 1-like
LOC_Os02g08490	LOC_Os02g08490.1 protein	1.809	Os02g0181900	4328515	ClpB-m	Similar to ClpB
LOC_Os02g08544	LOC_Os02g08544.1 protein	1.60646	Os02g0182800	4328520		Similar to NTH23 protein
LOC_Os02g09170	LOC_Os02g09170.1 protein	1.85007	Os02g0184400	4328527	OsSPS2	Similar to Sucrose-phosphate synthase 9 (EC 2.4.1.14)
LOC_Os02g09340	LOC_Os02g09340.1 protein	0.604227	Os02g0186400	4328539		Spectrin repeat containing protein
LOC_Os02g09359	LOC_Os02g09359.1 protein	1.99113	Os02g0186500	4328540	OsRLCK64	Similar to Protein kinase-like protein
LOC_Os02g09380	LOC_Os02g09380.1 protein	4.62852	Os02g0186700			Conserved hypothetical protein
LOC_Os02g09420	LOC_Os02g09420.1 protein	1.98745	Os02g0187100		OsCYL1	Similar to cyclase
LOC_Os02g09740	LOC_Os02g09740.1 protein	2.14287	Os02g0190500	4328571		Serine/threonine protein kinase-related domain containing protein
LOC_Os02g09780	LOC_Os02g09780.1 protein	1.61871	Os02g0190900	4328575		Phytoene dehydrogenase-like protein
LOC_Os02g09900	LOC_Os02g09900.1 protein	1.58687	Os02g0192200	4328583		Octicosapeptide/Phox/Bem1p domain containing protein
LOC_Os02g09940	LOC_Os02g09940.1 protein	0.641427	Os02g0192700	4328586	Pre	Similar to Thioredoxin peroxidase
LOC_Os02g10060	LOC_Os02g10060.1 protein	1.85741	Os02g0194000		OsCHB72	Similar to ATSWI3B
LOC_Os02g10070	LOC_Os02g10070.2 protein	1.57292	Os02g0194100	4328598		Similar to Citrate synthase (EC 4.1.3.7)
LOC_Os02g10080	LOC_Os02g10080.1 protein	2.04088	Os02g0194200	4328599	OsC3H14	K Homology, type 1, subgroup domain containing protein
LOC_Os02g10120	LOC_Os02g10120.1 protein	0.235045	Os02g0194700	4328603	OsLOX1	Similar to Lipoxygenase 2.3, chloroplast precursor (EC 1.13.11.12) (LOX2:Hv:3)
LOC_Os02g10180	LOC_Os02g10180.1 protein	1.62042	Os02g0195300	4328607	OsDjC16	Similar to dnaJ subfamily C member 7
LOC_Os02g10190	LOC_Os02g10190.1 protein	1.9544	Os02g0195500	4328608		Protein of unknown function DUF1680 family protein
LOC_Os02g10220	LOC_Os02g10220.1 protein	1.90975	Os02g0195800		OsDjC17	Similar to Chaperone protein dnaJ 6 (AtJ6) (AtDjC6)
LOC_Os02g10230	LOC_Os02g10230.1 protein	1.9773	Os02g0196000			Zinc/iron permease family protein
LOC_Os02g10290	LOC_Os02g10290.1 protein	1.62693	Os02g0196600	4328616	HMA4	Heavy metal P1B-type ATPase, Cu-transporting ATPase, Control of Cu accumulation in rice grai
LOC_Os02g10380	LOC_Os02g10380.1 protein	1.81878	Os02g0197500			Regulator of chromosome condensation, RCC1 domain containing protein
LOC_Os02g10390	LOC_Os02g10390.1 protein	0.40229	Os02g0197600	4328623		Chlorophyll a/b-binding protein type III (Fragment)
LOC_Os02g10480	LOC_Os02g10480.1 protein	2.02728	Os02g0198300	4328629		ARF GTPase-activating protein GIT2 (G protein-coupled receptor kinase- interactor 2) (GRK-interacting protein 2) (Cool-interacting tyrosine- phosphorylated protein 2) (CAT2) (CAT-2). Splice isoform 2
LOC_Os02g10510	LOC_Os02g10510.1 protein	1.67587	Os02g0198600	4328632		Similar to DNA-damage inducible protein DDI1-like
LOC_Os02g10520	LOC_Os02g10520.1 protein	1.78353	Os02g0198700	4328633	OsSub12	Similar to Subtilisin-like protease
LOC_Os02g10540	LOC_Os02g10540.1 protein	1.74513	Os02g0198900	4328635	OsRPL7/L12	Similar to Ribosomal protein L7/L12
LOC_Os02g10640	LOC_Os02g10640.1 protein	1.69262	Os02g0199900	4328642	OsRpt4a	Similar to 26S proteasome regulatory complex subunit p42D
LOC_Os02g10794	LOC_Os02g10794.1 protein	1.54025	Os02g0202300			Protein of unknown function DUF3414 domain containing protein
LOC_Os02g10810	LOC_Os02g10810.1 protein	1.85052	Os02g0202500			Similar to nucleic acid binding
LOC_Os02g10820	LOC_Os02g10820.1 protein	1.84525	Os02g0202600	4328658		Tetratricopeptide-like helical domain containing protein
LOC_Os02g10860	LOC_Os02g10860.1 protein	1.88763	Os02g0202950			Similar to OSIGBa0125M19.6 protein
LOC_Os02g10860	LOC_Os02g10860.1 protein	1.88763	Os02g0203000		#N/A	#N/A
LOC_Os02g10880	LOC_Os02g10880.1 protein	2.1345	Os02g0203300			Similar to UDP-glycosyltransferase UGT75E3
LOC_Os02g10920	LOC_Os02g10920.5 protein	1.76003	Os02g0203700	4328666	SRZ1	Similar to Testis expressed sequence 13A protein
LOC_Os02g10970	LOC_Os02g10970.1 protein	1.79668	Os02g0204201		OsCYP95	Hypothetical gene
LOC_Os02g10970	LOC_Os02g10970.1 protein	1.79668	Os02g0204300		#N/A	#N/A
LOC_Os02g11030	LOC_Os02g11030.1 protein	1.9369	Os02g0205000	4328671		Ribosomal protein L19 family protein
LOC_Os02g11050	LOC_Os02g11050.1 protein	1.94839	Os02g0205300	4328674	OSRPT6	Similar to TAT-binding protein homolog (Fragment)
LOC_Os02g11720	LOC_Os02g11720.1 protein	1.79874	Os02g0207900	4328684		Similar to esterase/lipase/thioesterase family protein
LOC_Os02g11740	LOC_Os02g11740.1 protein	1.62414	Os02g0208100	4328685	OsNTT2	Similar to plastidic ATP/ADP-transporter
LOC_Os02g11780	LOC_Os02g11780.1 protein	1.94791	Os02g0208600			Transcription elongation factor S-II, central region domain containing protein
LOC_Os02g11830	LOC_Os02g11830.2 protein	1.6174	Os02g0209000			Hypothetical conserved gene
LOC_Os02g11840	LOC_Os02g11840.1 protein	1.83532	Os02g0209100			Similar to Coatomer beta' subunit (Beta'-coat protein) (Beta'-COP) (p102)
LOC_Os02g12650	LOC_Os02g12650.1 protein	1.635	Os02g0218200	4328737		Peptidase M1, membrane alanine aminopeptidase family protein
LOC_Os02g12740	LOC_Os02g12740.1 protein	1.79404	Os02g0219400	4328747		Similar to Yarrowia lipolytica chromosome F of strain CLIB99 of Yarrowia lipolytica
LOC_Os02g12794	LOC_Os02g12794.3 protein	1.69306	Os02g0220500	4328752		Elongation factor 1-gamma (EF-1-gamma) (eEF-1B gamma)
LOC_Os02g12800	LOC_Os02g12800.2 protein	2.33046	Os02g0220600	4328753	eEF1Bgamma	Similar to Elongation factor 1-gamma
LOC_Os02g12850	LOC_Os02g12850.1 protein	1.99711	Os02g0221500	4328758	RBPI	Nucleotide-binding, alpha-beta plait domain containing protein
LOC_Os02g13130	LOC_Os02g13130.1 protein	1.73691	Os02g0224300			HMW glutenin family protein
LOC_Os02g13140	LOC_Os02g13140.1 protein	1.63457	Os02g0224400	4328771		Similar to Xaa-Pro dipeptidase (EC 3.4.13.9) (X-Pro dipeptidase) (Proline dipeptidase) (Prolidase) (Imidodipeptidase)
LOC_Os02g13970	LOC_Os02g13970.2 protein	0.661333	Os02g0234500	4328820		NAD(P)-binding domain containing protein
LOC_Os02g14000	LOC_Os02g14000.2 protein	1.63545	Os02g0235000			Similar to Actin-related protein 2/3 complex subunit 3
LOC_Os02g14059	LOC_Os02g14059.1 protein	1.62522	Os02g0235600	4328826		Similar to 60S ribosomal protein L11-2 (L16). Splice isoform 2
LOC_Os02g14110	LOC_Os02g14110.1 protein	1.59421	Os02g0236000	4328828		Similar to Aspartate aminotransferase (EC 2.6.1.1) (Fragment)
LOC_Os02g14440	LOC_Os02g14440.1 protein	0.113678	Os02g0240300	4328842	prx29	Similar to Class III peroxidase GvPx2b (Fragment)
LOC_Os02g14760	LOC_Os02g14760.1 protein	2.6776	Os02g0244600	4328858		Nucleotide-binding, alpha-beta plait domain containing protein
LOC_Os02g14860	LOC_Os02g14860.1 protein	1.92327	Os02g0246300	4328867		Prefoldin domain containing protein
LOC_Os02g14929	LOC_Os02g14929.1 protein	2.76444	Os02g0247200	4328872		Similar to T-complex protein 1, gamma subunit (TCP-1-gamma) (CCT-gamma) (Matricin) (mTRiC-P5)
LOC_Os02g14980	LOC_Os02g14980.1 protein	1.72395	Os02g0247800		OsEFCAX2	Similar to calcium ion binding protein
LOC_Os02g15220	LOC_Os02g15220.2 protein	1.59983	Os02g0250300	4328885	GTE4	Bromodomain containing protein
LOC_Os02g15230	LOC_Os02g15230.1 protein	1.52753	Os02g0250400	4328886	BS1	Similar to Esterase
LOC_Os02g15270	LOC_Os02g15270.1 protein	4.16325	Os02g0251700	4328898		Conserved hypothetical protein
LOC_Os02g15550	LOC_Os02g15550.2 protein	1.83142	Os02g0254700		OsSPMS2	Similar to Spermidine synthase 3
LOC_Os02g15750	LOC_Os02g15750.1 protein	0.590112	Os02g0257300		OsStr12	Rhodanese-like domain containing protein
LOC_Os02g15750	LOC_Os02g15750.1 protein	0.590112	Os02g0257400		#N/A	#N/A
LOC_Os02g15860	LOC_Os02g15860.1 protein	1.67298	Os02g0258800	4328929		Conserved hypothetical protein
LOC_Os02g16550	LOC_Os02g16550.1 protein	1.8486	Os02g0265400	4328954		Similar to Vacuolar protein sorting 29 (Vesicle protein sorting 29) (hVPS29) (PEP11). Splice isoform 2
LOC_Os02g17360	LOC_Os02g17360.1 protein	1.52017	Os02g0273800	4328994		Multi antimicrobial extrusion protein MatE domain containing protein
LOC_Os02g17390	LOC_Os02g17390.1 protein	1.69586	Os02g0274100	4328997	AIM1	3-hydroxyacyl-CoA dehydrogenase, Multifunctional protein, RNA- and microtubule-binding protein, Salicylic acid (SA) biosynthesis, Maintenance of root meristem activity, Beta -oxidation of fatty acid
LOC_Os02g17470	LOC_Os02g17470.1 protein	1.83411	Os02g0274700			Zinc finger, RanBP2-type domain containing protein
LOC_Os02g17500	LOC_Os02g17500.2 protein	1.52853	Os02g0274900	4328999		Major facilitator superfamily protein
LOC_Os02g17520	LOC_Os02g17520.1 protein	2.03082	Os02g0275100	4329000		Cytochrome C biogenesis protein family protein
LOC_Os02g17870	LOC_Os02g17870.1 protein	1.55593	Os02g0280000			Hypothetical gene
LOC_Os02g17870	LOC_Os02g17870.1 protein	1.55593	Os02g0280100		#N/A	#N/A
LOC_Os02g17920	LOC_Os02g17920.1 protein	0.467508	Os02g0280500		OsGLYI2	Similar to Glyoxalase I
LOC_Os02g18090	LOC_Os02g18090.1 protein	1.951	Os02g0282100	4329028		Conserved hypothetical protein
LOC_Os02g18380	LOC_Os02g18380.1 protein	2.64768	Os02g0284600	4329034	OsRPL27.3	Similar to 60S ribosomal protein L27
LOC_Os02g18410	LOC_Os02g18410.1 protein	2.25898	Os02g0285300	4329036	OsDREPP2	DREPP plasma membrane polypeptide family protein
LOC_Os02g18550	LOC_Os02g18550.1 protein	1.7598	Os02g0287000	4329042	RPS3A	Similar to 40S ribosomal protein S3a (CYC07 protein)
LOC_Os02g18660	LOC_Os02g18660.1 protein	2.27749	Os02g0288200	4329046		Protein of unknown function DUF573 domain containing protein
LOC_Os02g18820	LOC_Os02g18820.1 protein	1.93705	Os02g0290300	4329056	OsWD4-4	WD40/YVTN repeat-like domain containing protein
LOC_Os02g18830	LOC_Os02g18830.1 protein	2.34784	Os02g0290400	4329057		Ribosomal biogenesis, methyltransferase, EMG1/NEP1 domain containing protein
LOC_Os02g18850	LOC_Os02g18850.1 protein	1.65242	Os02g0290600		OsPOP5	Prolyl oligopeptidase family protein, Abiotic stress toleranc
LOC_Os02g18940	LOC_Os02g18940.1 protein	1.87263	Os02g0291500			Conserved hypothetical protein
LOC_Os02g19170	LOC_Os02g19170.1 protein	1.64668	Os02g0293800			Conserved hypothetical protein
LOC_Os02g19210	LOC_Os02g19210.1 protein	1.59432	Os02g0294600		OsWD4-41	Similar to transducin family protein / WD-40 repeat family protein
LOC_Os02g19220	LOC_Os02g19220.2 protein	1.58644	Os02g0294700			Topoisomerase II-associated protein PAT1 domain containing protein
LOC_Os02g19770	LOC_Os02g19770.1 protein	3.04095	Os02g0300700	4329091	OseIF1A-1	Similar to Eukaryotic translation initiation factor 1A (EIF-1A) (EIF-4C)
LOC_Os02g19804	LOC_Os02g19804.1 protein	1.76476	Os02g0301000	4329092	OsC3H15	Zinc finger, RING/FYVE/PHD-type domain containing protein
LOC_Os02g19820	LOC_Os02g19820.1 protein	1.55125	Os02g0301100	4329093	OsSWEET4	RAG1-activating protein 1 homologue domain containing protein
LOC_Os02g19924	LOC_Os02g19924.1 protein	1.71927	Os02g0302200	4329098		Similar to aminotransferase family protein
LOC_Os02g20170	LOC_Os02g20170.1 protein	1.70342	Os02g0304900	4329107	OsDi19-4	Drought-induced 19 family protein, Drought resistance, Positive regulation of abscisic acid (ABA) respons
LOC_Os02g20270	LOC_Os02g20270.1 protein	2.26939	Os02g0305600	4329109		Spectrin repeat containing protein
LOC_Os02g20330	LOC_Os02g20330.1 protein	2.13984	Os02g0306100			Similar to cation cation antiporter
LOC_Os02g20330	LOC_Os02g20330.1 protein	2.13984	Os02g0306250		#N/A	#N/A
LOC_Os02g20394	LOC_Os02g20394.1 protein	2.15408	Os02g0306900	4329116	OsDjB4	Similar to DnaJ-like protein
LOC_Os02g20540	LOC_Os02g20540.1 protein	4.05004	Os02g0308400	4329121	OsFLA19	FAS1 domain domain containing protein
LOC_Os02g20844	LOC_Os02g20844.1 protein	1.89254	Os02g0312500	4329131		Similar to predicted protein
LOC_Os02g20930	LOC_Os02g20930.1 protein	1.73907	Os02g0313400		API5	Apoptosis inhibitory 5 family protein
LOC_Os02g21185	LOC_Os02g21185.1 protein	0.584797	Os02g0316800			Similar to MRNA binding protein precursor
LOC_Os02g21280	LOC_Os02g21280.1 protein	2.51951	Os02g0317800			Similar to pollen Ole e 1 allergen and extensin family protein
LOC_Os02g21460	LOC_Os02g21460.1 protein	1.90348	Os02g0319300			Glutathione S-transferase, C-terminal-like domain containing protein
LOC_Os02g21650	LOC_Os02g21650.1 protein	1.62373	Os02g0321800	4329170		B-cell receptor-associated 31-like family protein
LOC_Os02g21660	LOC_Os02g21660.1 protein	2.25816	Os02g0321900	4329171		Similar to Ribosomal protein L1
LOC_Os02g21970	LOC_Os02g21970.1 protein	1.79006	Os02g0325100	4329182	OsRpt3	Similar to 26S protease regulatory subunit 6B (MIP224) (MB67 interacting protein) (TAT-binding protein-7) (TBP-7)
LOC_Os02g22070	LOC_Os02g22070.1 protein	1.69703	Os02g0326200			Nucleotide-binding, alpha-beta plait domain containing protein
LOC_Os02g22090	LOC_Os02g22090.1 protein	1.87387	Os02g0326600			Similar to Pattern formation protein EMB30
LOC_Os02g22190	LOC_Os02g22190.1 protein	1.92561	Os02g0327700	4329195		Glycosyltransferase AER61, uncharacterized domain containing protein
LOC_Os02g22370	LOC_Os02g22370.1 protein	1.76063	Os02g0329300	4329199		Conserved hypothetical protein
LOC_Os02g22780	LOC_Os02g22780.1 protein	1.65322	Os02g0332200	4329211		Similar to T-complex protein 1 delta subunit
LOC_Os02g24020	LOC_Os02g24020.1 protein	1.5402	Os02g0436400	4329224		NAD(P)-binding domain containing protein
LOC_Os02g24134	LOC_Os02g24134.1 protein	1.74126	Os02g0437800	4329228		Similar to vacuolar protein-sorting protein 45
LOC_Os02g24330	LOC_Os02g24330.1 protein	3.7731	Os02g0439700			Plant specific eukaryotic initiation factor 4B family protein
LOC_Os02g24550	LOC_Os02g24550.1 protein	2.52669	None		#N/A	#N/A
LOC_Os02g24634	LOC_Os02g24634.1 protein	0.493618	None		#N/A	#N/A
LOC_Os02g25870	LOC_Os02g25870.1 protein	1.77289	Os02g0456500			Similar to GTP-binding protein
LOC_Os02g26210	LOC_Os02g26210.1 protein	1.68224	Os02g0460200	4329294		Similar to OSIGBa0131F24.5 protein
LOC_Os02g26440	LOC_Os02g26440.1 protein	1.66646	Os02g0462900			Similar to Prefoldin subunit 1
LOC_Os02g26650	LOC_Os02g26650.3 protein	1.94031	Os02g0465400	4329318		Similar to 7-dehydrocholesterol reductase (EC 1.3.1.21) (7-DHC reductase) (Sterol delta-7-reductase) (Dwarf5 protein)
LOC_Os02g26660	LOC_Os02g26660.2 protein	1.60891	Os02g0465500	4329319		Exonuclease domain containing protein
LOC_Os02g26700	LOC_Os02g26700.1 protein	2.00946	Os02g0465900	4329321	OsARP	ChaC-like protein family protein
LOC_Os02g26850	LOC_Os02g26850.1 protein	2.91288	Os02g0468200	4329331		Protein of unknown function DUF652 family protein
LOC_Os02g26960	LOC_Os02g26960.1 protein	2.86607	Os02g0469000	4329336		Conserved hypothetical protein
LOC_Os02g27030	LOC_Os02g27030.1 protein	1.80672	Os02g0469600	4329339		Similar to Cysteine proteinase 1 precursor (EC 3.4.22.-)
LOC_Os02g27470	LOC_Os02g27470.1 protein	1.72771	Os02g0474700			Armadillo-like helical domain containing protein
LOC_Os02g27480	LOC_Os02g27480.1 protein	1.5836	Os02g0475300	4329355		Membrane attack complex component/perforin/complement C9 family protein
LOC_Os02g27740	LOC_Os02g27740.1 protein	2.23091	Os02g0478500			Conserved hypothetical protein
LOC_Os02g27760	LOC_Os02g27760.1 protein	2.31056	Os02g0478600	4329361	RPS15a	Similar to 40S ribosomal protein S15A
LOC_Os02g27950	LOC_Os02g27950.1 protein	1.7312	Os02g0480900	4329365		LsmAD domain domain containing protein
LOC_Os02g27960	LOC_Os02g27960.1 protein	2.00143	Os02g0481000	4329366		Translation protein SH3-like domain containing protein
LOC_Os02g28170	LOC_Os02g28170.1 protein	2.46383	Os02g0483500		OsMaT-2	Transferase family protein
LOC_Os02g28810	LOC_Os02g28810.1 protein	1.90964	Os02g0489400	4329381	S8	Similar to 40S ribosomal protein S8
LOC_Os02g28820	LOC_Os02g28820.1 protein	1.66389	Os02g0489500	4329382		Conserved hypothetical protein
LOC_Os02g29220	LOC_Os02g29220.1 protein	1.54842	Os02g0494600			Conserved hypothetical protein
LOC_Os02g29320	LOC_Os02g29320.1 protein	1.99222	Os02g0495900	4329404		Similar to predicted protein
LOC_Os02g29400	LOC_Os02g29400.1 protein	1.70414	Os02g0496900	4329408		Mitochondrial import receptor, TOM9-2 subunit, plant domain containing protein
LOC_Os02g29464	LOC_Os02g29464.1 protein	1.58342	Os02g0497500		Rad5	Similar to DNA repair protein Rad50
LOC_Os02g29480	LOC_Os02g29480.1 protein	1.75144	Os02g0497700	4329411		Similar to Ras-GTPase-activating protein SH3-domain binding protein-like
LOC_Os02g29890	LOC_Os02g29890.1 protein	1.87326	Os02g0502500	4329421		Protein kinase-like domain containing protein
LOC_Os02g30050	LOC_Os02g30050.1 protein	2.06246	Os02g0503400	4329423	OsRPL35	Similar to 60S ribosomal protein L35
LOC_Os02g30140	LOC_Os02g30140.2 protein	1.81116	Os02g0504100			Conserved hypothetical protein
LOC_Os02g30230	LOC_Os02g30230.1 protein	1.92663	Os02g0505400	4329434	EXO7F2	Component of Exo70 exocyst comple
LOC_Os02g30290	LOC_Os02g30290.1 protein	2.01988	None		#N/A	#N/A
LOC_Os02g30310	LOC_Os02g30310.1 protein	1.78622	Os02g0506500	4329438		Similar to ubiquitin-activating enzyme E1 domain-containing protein 1
LOC_Os02g30460	LOC_Os02g30460.1 protein	1.67125	Os02g0508000	4329443		Trimeric LpxA-like domain containing protein
LOC_Os02g30624	LOC_Os02g30624.1 protein	2.23995	Os02g0510100	4329449	OsCYP-7	Similar to U6 snRNA-associated Sm-like protein LSm6 (Sm protein F)
LOC_Os02g30630	LOC_Os02g30630.2 protein	1.77481	Os02g0510200	4329450	ALS	Acetolactate synthase (EC4.6.3.8), Acetohydroxy acid synthase, Herbicide resistance (mutated form of rice ALS, OsmALS (W548L/S627I)
LOC_Os02g30650	LOC_Os02g30650.1 protein	2.71893	Os02g0510600	4329453		Heavy metal transport/detoxification protein domain containing protein
LOC_Os02g30730	LOC_Os02g30730.2 protein	1.70939	Os02g0511500			Similar to DOT2 (DEFECTIVELY ORGANIZED TRIBUTARIES 2)
LOC_Os02g31220	LOC_Os02g31220.1 protein	1.65899	Os02g0517300	4329480		Topoisomerase II-associated protein PAT1 domain containing protein
LOC_Os02g31290	LOC_Os02g31290.2 protein	1.53343	Os02g0517531	9271988		Nucleotide-binding, alpha-beta plait domain containing protein
LOC_Os02g32030	LOC_Os02g32030.1 protein	2.09533	Os02g0519900	4329493		Similar to Elongation factor EF-2 (Fragment)
LOC_Os02g32120	LOC_Os02g32120.1 protein	1.583	Os02g0520800	4329497		Similar to Ubiquinol-cytochrome c reductase iron-sulfur subunit, mitochondrial precursor (EC 1.10.2.2) (Rieske iron-sulfur protein) (RISP)
LOC_Os02g32200	LOC_Os02g32200.1 protein	2.21638	Os02g0521700	4329500		Similar to Thioesterase family protein
LOC_Os02g32350	LOC_Os02g32350.2 protein	1.64683	Os02g0523500	4329508	OsTSN	RNA-binding protein, Transport and localization of storage protein mRNAs, Modulation of gene expressio
LOC_Os02g32370	LOC_Os02g32370.1 protein	1.64876	Os02g0523800	4329509	OsIPK2	Inositol polyphosphate kinase, Auxin signaling, Regulation of lateral root developmen
LOC_Os02g32490	LOC_Os02g32490.1 protein	1.5781	Os02g0525900	4329518		Similar to Acetyl-coenzyme A synthetase 2 (EC 6.2.1.1) (Acetate--CoA ligase 2) (Acyl-activating enzyme 2)
LOC_Os02g32760	LOC_Os02g32760.1 protein	2.45094	Os02g0529700	4329540		Similar to Acidic ribosomal protein P2a-4 (Fragment)
LOC_Os02g32814	LOC_Os02g32814.1 protein	3.06094	Os02g0530100	9272622	OsATX1	Similar to C4-dicarboxylate transporter/malic acid transport protein
LOC_Os02g32950	LOC_Os02g32950.1 protein	1.50514	Os02g0531600	9266285	RCN2	TFL1/CEN ortholog, Phosphatidylethanolamine-binding protein, PEBP family protein, Control of the phase transition of meristem, Control of flowering tim
LOC_Os02g32970	LOC_Os02g32970.1 protein	1.7929	Os02g0532300	4329550		Hypothetical conserved gene
LOC_Os02g32980	LOC_Os02g32980.1 protein	1.87326	Os02g0532500	4329551	OsGLP2-1	Germin-like protein, Fungal blast and bacterial blight resistanc
LOC_Os02g32990	LOC_Os02g32990.1 protein	1.91878	Os02g0532800	4329552		7TM GPCR, rhodopsin-like domain containing protein
LOC_Os02g33070	LOC_Os02g33070.1 protein	3.25455	Os02g0533800	4329559		Similar to ATPase inhibitor
LOC_Os02g33080	LOC_Os02g33080.1 protein	1.79767	Os02g0533900	4329560	OsCPA1	Similar to Carbon-nitrogen hydrolase family protein
LOC_Os02g33140	LOC_Os02g33140.1 protein	1.66215	Os02g0534800	4329563		Similar to 40S ribosomal protein S14 (Clone MCH2)
LOC_Os02g33180	LOC_Os02g33180.1 protein	2.02671	Os02g0535400		RAR1	Cys- and His-rich domain (CHORD, zinc binding finger motif) containing protein, Innate-immune respons
LOC_Os02g33320	LOC_Os02g33320.3 protein	2.44675	Os02g0536400	4329571		Nucleotide-binding, alpha-beta plait domain containing protein
LOC_Os02g33450	LOC_Os02g33450.1 protein	0.624008	Os02g0537700	4329578	OsPRX2	2-Cys peroxiredoxin (EC 1.11.1.15), Stomatal closure, Potassium deficiency toleranc
LOC_Os02g33490	LOC_Os02g33490.1 protein	1.82709	Os02g0537900	4329579		Similar to Vacuolar-type H+-translocating inorganic pyrophosphatase (EC 3.6.1.1)
LOC_Os02g33550	LOC_Os02g33550.1 protein	1.98763	Os02g0538700	4329582		Harpin-induced 1 domain containing protein
LOC_Os02g33600	LOC_Os02g33600.1 protein	1.79472	Os02g0539500	9268455	OsVQ8	VQ domain containing protein
LOC_Os02g33610	LOC_Os02g33610.1 protein	1.68482	Os02g0539600		GRY79	SANT domain, DNA binding domain containing protein
LOC_Os02g33710	LOC_Os02g33710.1 protein	1.52437	Os02g0541300			Hypothetical conserved gene
LOC_Os02g33710	LOC_Os02g33710.1 protein	1.52437	Os02g0541325		#N/A	#N/A
LOC_Os02g33730	LOC_Os02g33730.1 protein	1.73091	Os02g0541700			Similar to Ubiquinol-cytochrome c reductase complex 7.8 kDa protein (EC 1.10.2.2) (Mitochondrial hinge protein) (CR7)
LOC_Os02g33820	LOC_Os02g33820.1 protein	2.19172	Os02g0543000	4329601	OsAsr1	Abscisic stress ripening protein 1
LOC_Os02g34510	LOC_Os02g34510.1 protein	1.53458	Os02g0550100	4329623		Similar to Vacuolar ATP synthase 16 kDa proteolipid subunit (EC 3.6.3.14) (V- ATPase 16 kDa proteolipid subunit) (Fragment)
LOC_Os02g34530	LOC_Os02g34530.1 protein	1.52549	Os02g0550300		PDIL5	PDIL5-3 - Zea mays protein disulfide isomerase
LOC_Os02g34540	LOC_Os02g34540.1 protein	2.04122	Os02g0550400	4329625		Tetratricopeptide-like helical domain containing protein
LOC_Os02g34560	LOC_Os02g34560.1 protein	1.87612	Os02g0550600	4329626	OsNIN8	Plant neutral invertase family protein
LOC_Os02g34570	LOC_Os02g34570.2 protein	1.90093	Os02g0550700	4329627	OsCER7	Similar to Nucleolar autoantigen-like protein
LOC_Os02g34590	LOC_Os02g34590.1 protein	1.62979	Os02g0550900			FAR1 DNA binding domain domain containing protein
LOC_Os02g34630	LOC_Os02g34630.1 protein	1.62113	Os02g0551400			Homeodomain-related domain containing protein
LOC_Os02g34810	LOC_Os02g34810.1 protein	0.449383	Os02g0553200	4329643	APX8	Thylakoid membrane-bound ascorbate peroxidase, Tolerance to bacterial blight, Response to NaC
LOC_Os02g34830	LOC_Os02g34830.1 protein	1.7074	Os02g0553500			Tetratricopeptide-like helical domain containing protein
LOC_Os02g34830	LOC_Os02g34830.1 protein	1.7074	Os02g0553600		#N/A	#N/A
LOC_Os02g34884	LOC_Os02g34884.1 protein	1.74556	Os02g0554300	4329650		Similar to SAC1-like protein AtSAC1b (SAC domain protein 6)
LOC_Os02g35039	LOC_Os02g35039.1 protein	2.13365	Os02g0556100	4329661		NAD(P)-binding domain containing protein
LOC_Os02g35060	LOC_Os02g35060.1 protein	2.12034	Os02g0556400	4329664		tRNA guanosine-2'-O-methyltransferase, TRM11 domain containing protein
LOC_Os02g35130	LOC_Os02g35130.2 protein	2.07647	Os02g0557100	4329671		AIG1 domain containing protein
LOC_Os02g35160	LOC_Os02g35160.1 protein	2.22652	Os02g0557600	4329675		Translation initiation factor SUI1 domain containing protein
LOC_Os02g35700	LOC_Os02g35700.1 protein	1.57906	Os02g0565100	4329701		Nucleoside diphosphate kinase, core domain containing protein
LOC_Os02g35750	LOC_Os02g35750.2 protein	1.50348	Os02g0565400	4329703	WSL4	P-family pentatricopeptide repeat (PPR) protein, Chloroplast biogenesis during early leaf development, Chloroplast RNA group II intron splicin
LOC_Os02g35940	LOC_Os02g35940.1 protein	1.62398	Os02g0567800	4329717		Alpha/beta hydrolase fold-3 domain containing protein
LOC_Os02g35950	LOC_Os02g35950.1 protein	2.50722	Os02g0567900			Similar to H0818E04.14 protein
LOC_Os02g36390	LOC_Os02g36390.1 protein	1.78124	Os02g0573300			Similar to Nucleotide-sugar transporter/ sugar porter
LOC_Os02g36530	LOC_Os02g36530.1 protein	4.22289	Os02g0575000	4329748		Conserved hypothetical protein
LOC_Os02g36710	LOC_Os02g36710.1 protein	2.08586	Os02g0576700	4329757	OsNAPL6	Nucleosome assembly protein (NAP) family protein, H3/H4 histone chaperone, Abiotic stress response and adaptatio
LOC_Os02g36974	LOC_Os02g36974.4 protein	1.54494	Os02g0580300	4329775	GID2	Similar to 14-3-3 protein 6
LOC_Os02g37000	LOC_Os02g37000.1 protein	1.69011	Os02g0580500	4329777		Similar to Prohibitin
LOC_Os02g37050	LOC_Os02g37050.1 protein	1.55515	Os02g0581000			GPI ethanolamine phosphate transferase 1 domain containing protein
LOC_Os02g37060	LOC_Os02g37060.1 protein	0.258108	Os02g0581100	4329783		Similar to photosystem II 5 kD protein
LOC_Os02g37080	LOC_Os02g37080.1 protein	1.57005	Os02g0581300	4329785		TRAM, LAG1 and CLN8 homology domain containing protein
LOC_Os02g37150	LOC_Os02g37150.1 protein	2.39032	Os02g0582400	4329794		Conserved hypothetical protein
LOC_Os02g37300	LOC_Os02g37300.1 protein	1.84549	Os02g0584800	4329803		Heavy metal transport/detoxification protein domain containing protein
LOC_Os02g37590	LOC_Os02g37590.1 protein	1.59328	Os02g0588500			Hypothetical conserved gene
LOC_Os02g37654	LOC_Os02g37654.1 protein	1.52385	Os02g0589000	4329820		Lecithin:cholesterol acyltransferase family protein
LOC_Os02g37690	LOC_Os02g37690.1 protein	1.68012	Os02g0589400	4329821	UGT	UDP-glucuronosyl/UDP-glucosyltransferase family protein
LOC_Os02g37700	LOC_Os02g37700.1 protein	1.52897	Os02g0589700			Lecithin:cholesterol/phospholipid:diacylglycerol acyltransferase domain containing protein
LOC_Os02g37862	LOC_Os02g37862.1 protein	2.07559	Os02g0591700	4329831		Similar to Candida glabrata strain CBS138 chromosome L complete sequence
LOC_Os02g37870	LOC_Os02g37870.1 protein	2.82452	Os02g0591800	4329832		Brix domain containing protein
LOC_Os02g37910	LOC_Os02g37910.1 protein	1.50149	Os02g0592200	4329834		Similar to alkaline phosphatase D
LOC_Os02g38020	LOC_Os02g38020.1 protein	0.65489	Os02g0593500	4329844	OsPT14	Phosphate transporter family protein
LOC_Os02g38050	LOC_Os02g38050.1 protein	1.90455	Os02g0593700	4329846		Similar to TA4 protein (Fragment)
LOC_Os02g38080	LOC_Os02g38080.2 protein	1.79226	Os02g0594100	4329848		Similar to Protein kinase ATN1
LOC_Os02g38190	LOC_Os02g38190.1 protein	2.70496	Os02g0595400	4329857		Conserved hypothetical protein
LOC_Os02g38200	LOC_Os02g38200.1 protein	1.71185	Os02g0595500	4329858	OsIDHc	Similar to NAD-dependent isocitrate dehydrogenase precursor (EC 1.1.1.41)
LOC_Os02g38220	LOC_Os02g38220.1 protein	1.92426	Os02g0595800	4329860		Similar to Eukaryotic initiation factor 4B (Fragment)
LOC_Os02g38340	LOC_Os02g38340.1 protein	2.57983	Os02g0596900	4329867		Actin/actin-like family protein
LOC_Os02g38440	LOC_Os02g38440.1 protein	1.84491	Os02g0597900			Similar to B-keto acyl reductase
LOC_Os02g38680	LOC_Os02g38680.1 protein	1.81108	Os02g0599100			Hypothetical conserved gene
LOC_Os02g38810	LOC_Os02g38810.1 protein	2.14825	Os02g0600100	4329887		Similar to 26S proteasome subunit RPN7
LOC_Os02g38840	LOC_Os02g38840.2 protein	1.54607	Os02g0600400	4329889	OsG6PDH1	Similar to Glucose-6-phosphate dehydrogenase
LOC_Os02g38900	LOC_Os02g38900.1 protein	1.53701	Os02g0601100		OsISC43	Similar to Nucleotide-binding protein
LOC_Os02g38920	LOC_Os02g38920.1 protein	2.23025	Os02g0601300	4329892	OsGapC1	Similar to Glyceraldehyde-3-phosphate dehydrogenase, cytosolic 3 (EC 1.2.1.12)
LOC_Os02g38980	LOC_Os02g38980.1 protein	1.63094	Os02g0601800	4329897		Bromodomain containing protein
LOC_Os02g39030	LOC_Os02g39030.1 protein	4.17106	Os02g0602300	4329900		Similar to Myelin transcription factor 1 (MYT1) (MYTI) (Proteolipid protein binding protein) (PLPB1)
LOC_Os02g39050	LOC_Os02g39050.1 protein	1.63276	Os02g0602500	4329902		Similar to Pre-mRNA-splicing factor ISY1
LOC_Os02g39060	LOC_Os02g39060.1 protein	1.53563	Os02g0602600			RNA recognition motif domain domain containing protein
LOC_Os02g39140	LOC_Os02g39140.1 protein	1.61646	Os02g0603600		OsbHLH11	Conserved hypothetical protein
LOC_Os02g39180	LOC_Os02g39180.1 protein	6.99595	Os02g0604100	4329913		Conserved hypothetical protein
LOC_Os02g39350	LOC_Os02g39350.1 protein	2.04258	Os02g0606100			Similar to eukaryotic translation initiation factor-related
LOC_Os02g39370	LOC_Os02g39370.1 protein	2.38876	Os02g0606300			Similar to Met-10+ like family protein
LOC_Os02g39550	LOC_Os02g39550.2 protein	1.70326	Os02g0608400	4329936		EF-Hand type domain containing protein
LOC_Os02g39570	LOC_Os02g39570.1 protein	1.71575	Os02g0608550			Similar to acetolactate synthase/ amino acid binding protein
LOC_Os02g39570	LOC_Os02g39570.1 protein	1.71575	Os02g0608600		#N/A	#N/A
LOC_Os02g39630	LOC_Os02g39630.1 protein	1.58317	Os02g0609400	4329944		Similar to Iron-stress related protein
LOC_Os02g39700	LOC_Os02g39700.1 protein	2.24228	Os02g0610400	4329949		Lupus La protein family protein
LOC_Os02g39730	LOC_Os02g39730.2 protein	0.440227	Os02g0610700	4329952		Chlorophyll a/b binding protein domain domain containing protein
LOC_Os02g39820	LOC_Os02g39820.1 protein	1.741	Os02g0611400	4329957		Pentatricopeptide repeat domain containing protein
LOC_Os02g39840	LOC_Os02g39840.1 protein	1.69642	Os02g0611500	4329958		Similar to Eukaryotic initiation factor-like protein
LOC_Os02g39850	LOC_Os02g39850.1 protein	1.64517	Os02g0611800	4329959	OsHCT2	Similar to Hydroxyanthranilate hydroxycinnamoyltransferase 3
LOC_Os02g39890	LOC_Os02g39890.1 protein	1.62474	Os02g0612300	4329963	du3	Similar to Nuclear cap binding protein subunit 2 (20 kDa nuclear cap binding protein) (NCBP 20 kDa subunit) (CBP20)
LOC_Os02g39920	LOC_Os02g39920.1 protein	1.671	Os02g0612800	4329966	BIP135	AT hook, DNA-binding, conserved site domain containing protein
LOC_Os02g40090	LOC_Os02g40090.1 protein	1.64429	Os02g0614500	4329977		Protein of unknown function DUF250 domain containing protein
LOC_Os02g40260	LOC_Os02g40260.1 protein	3.00616	Os02g0616100	9269584		Similar to protein binding protein
LOC_Os02g40460	LOC_Os02g40460.1 protein	1.85253	Os02g0617700			Nucleic acid-binding, OB-fold domain containing protein
LOC_Os02g40490	LOC_Os02g40490.1 protein	1.56129	Os02g0617900			Non-protein coding transcript
LOC_Os02g40500	LOC_Os02g40500.1 protein	2.0886	Os02g0618100		OsGRX9	Similar to Glutaredoxin-C4, chloroplastic
LOC_Os02g40514	LOC_Os02g40514.2 protein	2.38452	Os02g0618250	9269830		Similar to H/ACA ribonucleoprotein complex subunit 3-like protein
LOC_Os02g40680	LOC_Os02g40680.1 protein	2.83333	Os02g0620100	4330004		Mis12 family protein
LOC_Os02g40700	LOC_Os02g40700.1 protein	1.58207	Os02g0620400	4330006		RmlC-like jelly roll fold domain containing protein
LOC_Os02g40810	LOC_Os02g40810.1 protein	1.85949	Os02g0621500	4330014		Zinc finger, RING/FYVE/PHD-type domain containing protein
LOC_Os02g40830	LOC_Os02g40830.1 protein	1.52287	Os02g0621700	4330016		Similar to Succinyl-CoA ligase [GDP-forming] beta-chain, mitochondrial precursor (EC 6.2.1.4) (Succinyl-CoA synthetase, beta chain) (SCS-beta)
LOC_Os02g40880	LOC_Os02g40880.1 protein	2.41568	Os02g0622300	4330020	OsRPL14	Ribosomal protein L14 family protein
LOC_Os02g40890	LOC_Os02g40890.1 protein	1.51075	Os02g0622400	4330021		Glycolipid transfer protein, GLTP domain containing protein
LOC_Os02g41590	LOC_Os02g41590.1 protein	1.72415	Os02g0625500			Similar to Adenosine kinase-like protein (Fragment)
LOC_Os02g41650	LOC_Os02g41650.3 protein	1.70577	Os02g0626400	4330036	OsPAL	Phenylalanine ammonia-lyase (EC 4.3.1.5)
LOC_Os02g41680	LOC_Os02g41680.1 protein	1.80596	Os02g0627100	4330040	OsPAL1	Similar to Phenylalanine ammonia-lyase (EC 4.3.1.5)
LOC_Os02g41820	LOC_Os02g41820.1 protein	1.8447	Os02g0628800			Similar to Ubiquitin-like protein 5 (Fragment)
LOC_Os02g41860	LOC_Os02g41860.1 protein	1.66332	Os02g0629200	4330049	OsPIP2	Similar to cDNA clone:001-039-E03, full insert sequence
LOC_Os02g41990	LOC_Os02g41990.2 protein	1.55214	Os02g0631000	4330055		Similar to H0322F07.6 protein
LOC_Os02g42134	LOC_Os02g42134.2 protein	1.79041	Os02g0632500	4330061		Arf GTPase activating protein family protein
LOC_Os02g42210	LOC_Os02g42210.1 protein	1.73708	Os02g0633200	4330066		Pentatricopeptide repeat domain containing protein
LOC_Os02g42230	LOC_Os02g42230.1 protein	1.63082	Os02g0633400	4330068	RPA2B	Similar to 61 kDa protein homolog
LOC_Os02g42300	LOC_Os02g42300.1 protein	2.21297	Os02g0634600	4330072		Conserved hypothetical protein
LOC_Os02g42320	LOC_Os02g42320.3 protein	1.8035	Os02g0634900	4330075	PAB2	Proteasome subunit alpha type 2 (EC 3.4.25.1) (20S proteasome alpha subunit B) (20S proteasome subunit alpha-2)
LOC_Os02g42350	LOC_Os02g42350.1 protein	2.92911	Os02g0635200	4330077	NIT1	Similar to Nitrilase 2 (EC 3.5.5.1)
LOC_Os02g42406	LOC_Os02g42406.1 protein	2.12073	Os02g0636300	4330083	OsRH47A	DEAD-like helicase, N-terminal domain containing protein
LOC_Os02g42450	LOC_Os02g42450.1 protein	3.42028	Os02g0637000			Similar to OSIGBa0135K14.7 protein
LOC_Os02g42520	LOC_Os02g42520.2 protein	1.5979	Os02g0637700	4330090		Similar to Alcohol dehydrogenase-like protein
LOC_Os02g42550	LOC_Os02g42550.1 protein	1.70105	Os02g0638000	4330093		Conserved hypothetical protein
LOC_Os02g42570	LOC_Os02g42570.1 protein	0.506195	Os02g0638300	4330096		Similar to Ferredoxin-thioredoxin reductase, variable chain (FTR-V) (Ferredoxin- thioredoxin reductase subunit A) (FTR-A)
LOC_Os02g42580	LOC_Os02g42580.1 protein	1.59045	Os02g0638400	4330097	OsERF#46	BRO1 domain containing protein
LOC_Os02g42650	LOC_Os02g42650.1 protein	1.54976	Os02g0639500			Similar to Expansin-B16
LOC_Os02g42700	LOC_Os02g42700.1 protein	1.56851	Os02g0639900		OsTRXM1	Similar to Thioredoxin M-type, chloroplast precursor (TRX-M)
LOC_Os02g42880	LOC_Os02g42880.1 protein	1.62842	Os02g0642200	4330124	OsREM1.4	Similar to Remorin
LOC_Os02g42940	LOC_Os02g42940.1 protein	1.51144	Os02g0643000	4330129		Similar to VAP27
LOC_Os02g43020	LOC_Os02g43020.1 protein	1.9089	Os02g0644100	4330134		Similar to Heat shock protein STI (Stress inducible protein) (GmSTI)
LOC_Os02g43194	LOC_Os02g43194.1 protein	1.73575	Os02g0646500	4330146	OS-ALDH	Aldehyde dehydrogenase domain containing protein
LOC_Os02g43300	LOC_Os02g43300.1 protein	1.92607	Os02g0648300			SANT domain, DNA binding domain containing protein
LOC_Os02g43360	LOC_Os02g43360.1 protein	3.43955	Os02g0649800	4330160		Similar to Cytochrome B5 homolog (Fragment)
LOC_Os02g43600	LOC_Os02g43600.1 protein	0.65281	Os02g0652600	9272428		Ribosomal protein L19 family protein
LOC_Os02g43750	LOC_Os02g43750.1 protein	1.63107	Os02g0654400	4330186		Transcription initiation factor TFIID component TAF4 domain containing protein
LOC_Os02g43920	LOC_Os02g43920.1 protein	1.96595	Os02g0656300	4330199	APC8	Similar to Anaphase-promoting complex subunit 8-like protein
LOC_Os02g43930	LOC_Os02g43930.1 protein	2.33493	Os02g0656500	4330201	OsDjA1	DnaJ-like protein
LOC_Os02g44108	LOC_Os02g44108.1 protein	2.36064	Os02g0658800	4330213	OsEXPB11	Beta-expansin
LOC_Os02g44111	LOC_Os02g44111.1 protein	1.56613	Os02g0658900	4330214		Sec20 family protein
LOC_Os02g44132	LOC_Os02g44132.2 protein	2.26649	Os02g0659600			Hypothetical conserved gene
LOC_Os02g44320	LOC_Os02g44320.1 protein	0.358494	Os02g0662100	4330227	OsHyPRP2	Similar to Tfm5 protein
LOC_Os02g44500	LOC_Os02g44500.1 protein	1.56125	Os02g0664000	4330235	OsGpx3	Similar to Phospholipid hydroperoxide glutathione peroxidase, chloroplast precursor (EC 1.11.1.12) (PHGPx)
LOC_Os02g44630	LOC_Os02g44630.2 protein	1.62168	Os02g0666200	4330248	OsPIP1a	Aquaporin
LOC_Os02g44810	LOC_Os02g44810.1 protein	1.9667	Os02g0668400	4330262		tRNA pseudouridine synthase family protein
LOC_Os02g44870	LOC_Os02g44870.1 protein	1.74585	Os02g0669100	4330265	LIP9	Dehydrin family protein
LOC_Os02g44930	LOC_Os02g44930.1 protein	3.52637	Os02g0670400	4330271		Similar to HMGc1 protein
LOC_Os02g44940	LOC_Os02g44940.1 protein	1.72886	Os02g0670500	4330272	OsRALF-8	Rapid ALkalinization Factor family protein
LOC_Os02g45070	LOC_Os02g45070.1 protein	1.7616	Os02g0672200	4330281	OsAGO1a	Similar to AGO1 homologous protein
LOC_Os02g45090	LOC_Os02g45090.1 protein	2.26661	Os02g0672400	4330282		Sugar transporter, conserved site domain containing protein
LOC_Os02g45110	LOC_Os02g45110.1 protein	1.8003	Os02g0672600	4330284		Similar to N6-adenosine-methyltransferase 70 kDa subunit (EC 2.1.1.62) (MT-A70) (Methyltransferase-like protein 3). Splice isoform 2
LOC_Os02g45120	LOC_Os02g45120.2 protein	1.81355	Os02g0672700	4330285		DNA-directed RNA polymerase, M/15 kDa subunit domain containing protein
LOC_Os02g45240	LOC_Os02g45240.1 protein	1.64179	Os02g0674700	4330296		Similar to protein binding protein
LOC_Os02g45344	LOC_Os02g45344.1 protein	2.28774	Os02g0676000	4330302		Membrane bound O-acyl transferase, MBOAT family protein
LOC_Os02g45540	LOC_Os02g45540.1 protein	1.69739	Os02g0678400	9267465		NAD(P)-binding domain containing protein
LOC_Os02g45920	LOC_Os02g45920.1 protein	1.81845	Os02g0684300			Nucleoporin protein Ndc1-Nup domain containing protein
LOC_Os02g46090	LOC_Os02g46090.1 protein	1.50259	Os02g0685900	4330351	OsCDPK5	Similar to Calcium dependent protein kinase
LOC_Os02g46130	LOC_Os02g46130.1 protein	1.76707	Os02g0686400	4330354		Similar to Aspartyl-tRNA synthetase (EC 6.1.1.12) (Aspartate--tRNA ligase) (AspRS)
LOC_Os02g46150	LOC_Os02g46150.1 protein	1.84528	Os02g0686600			Metal-dependent protein hydrolase family protein
LOC_Os02g46260	LOC_Os02g46260.1 protein	1.60399	Os02g0687900		OsSCP9	Peptidase S10, serine carboxypeptidase family protein
LOC_Os02g46510	LOC_Os02g46510.1 protein	1.61916	Os02g0690700	4330379		Clathrin coat associated protein AP-50 domain containing protein
LOC_Os02g46520	LOC_Os02g46520.1 protein	1.81103	Os02g0690800	4330380		Peptidase M20 family protein
LOC_Os02g46620	LOC_Os02g46620.1 protein	1.5328	Os02g0693000	4330386		Conserved hypothetical protein
LOC_Os02g46956	LOC_Os02g46956.1 protein	2.24789	Os02g0697200	4330405		Conserved hypothetical protein
LOC_Os02g46962	LOC_Os02g46962.2 protein	1.59223	Os02g0697300	4330406		ENTH/VHS domain containing protein
LOC_Os02g46970	LOC_Os02g46970.1 protein	1.88543	Os02g0697400	4330407	4CL2	4-coumarate:coenzyme A ligase, Flavonoid biosynthesi
LOC_Os02g46990	LOC_Os02g46990.1 protein	2.02441	Os02g0697600	4330409		ATPase, AAA-type, core domain containing protein
LOC_Os02g47020	LOC_Os02g47020.1 protein	0.251408	Os02g0698000	4330413	OsPrk	Similar to Phosphoribulokinase, chloroplast precursor (EC 2.7.1.19) (Phosphopentokinase) (PRKase) (PRK)
LOC_Os02g47140	LOC_Os02g47140.1 protein	2.35454	Os02g0699600	4330425		Similar to 60S ribosomal protein L12
LOC_Os02g47350	LOC_Os02g47350.1 protein	1.67642	Os02g0701900	4330439		NAD(P)-binding domain containing protein
LOC_Os02g47560	LOC_Os02g47560.1 protein	0.661157	Os02g0704300			Conserved hypothetical protein
LOC_Os02g47590	LOC_Os02g47590.1 protein	1.62282	Os02g0704800	9269231		Similar to ornithine carbamoyltransferase
LOC_Os02g47610	LOC_Os02g47610.1 protein	2.4686	Os02g0705000	4330458		NAD(P)-binding domain containing protein
LOC_Os02g47760	LOC_Os02g47760.1 protein	1.84614	Os02g0706500	4330465		ATPase, AAA-type, core domain containing protein
LOC_Os02g47840	LOC_Os02g47840.1 protein	1.56611	Os02g0707900	4330472		Rossmann-like alpha/beta/alpha sandwich fold domain containing protein
LOC_Os02g47850	LOC_Os02g47850.2 protein	1.73608	Os02g0708100	4330474	GAT1	Similar to Carbamoyl phosphate synthetase small subunit (EC 6.3.5.5)
LOC_Os02g47940	LOC_Os02g47940.1 protein	1.72026	Os02g0709200	4330482		Similar to Histidinol-phosphate aminotransferase, chloroplast precursor (EC 2.6.1.9) (Imidazole acetol-phosphate transaminase)
LOC_Os02g48000	LOC_Os02g48000.1 protein	1.76629	Os02g0709800	4330486	OsGAP1	GTPase-activating protein, Regulation of vesicle trafficking from trans-Golgi network to plasma membrane or central vacuol
LOC_Os02g48110	LOC_Os02g48110.1 protein	1.50717	Os02g0710900	4330492		Heat shock protein Hsp70 family protein
LOC_Os02g48290	LOC_Os02g48290.1 protein	1.62047	Os02g0713400	4330505	OsNTRB	Similar to Thioredoxin reductase 1 (EC 1.8.1.9) (NADPH-dependent thioredoxin reductase 1) (NTR 1)
LOC_Os02g48360	LOC_Os02g48360.1 protein	2.40362	Os02g0714200	4330512	OsPFPA1	Similar to Pyrophosphate--fructose 6-phosphate 1-phosphotransferase alpha subunit (EC 2.7.1.90) (PFP) (6-phosphofructokinase, pyrophosphate dependent) (Pyrophosphate-dependent 6-phosphofructose-1-kinase) (PPi-PFK)
LOC_Os02g48380	LOC_Os02g48380.1 protein	1.75084	Os02g0714500			Tetratricopeptide-like helical domain containing protein
LOC_Os02g48390	LOC_Os02g48390.1 protein	1.68773	Os02g0714600	4330515		Ribose-phosphate pyrophosphokinase 4 (EC 2.7.6.1) (Phosphoribosyl pyrophosphate synthetase 4)
LOC_Os02g48590	LOC_Os02g48590.1 protein	1.58667	Os02g0717100	4330526		Esterase/lipase/thioesterase domain containing protein
LOC_Os02g48620	LOC_Os02g48620.2 protein	1.93418	Os02g0717400	4330529		Tetratricopeptide-like helical domain containing protein
LOC_Os02g48630	LOC_Os02g48630.1 protein	1.73508	Os02g0717500	4330530		Similar to X7 (Fragment)
LOC_Os02g48650	LOC_Os02g48650.1 protein	1.60423	Os02g0717700			Acyl-CoA N-acyltransferase domain containing protein
LOC_Os02g48660	LOC_Os02g48660.1 protein	2.40044	Os02g0717800			Similar to 60S ribosomal protein l31 (Fragment)
LOC_Os02g48720	LOC_Os02g48720.2 protein	1.92861	Os02g0718900	4330539	ant	ADP,ATP carrier protein, mitochondrial precursor (ADP/ATP translocase) (Adenine nucleotide translocator) (ANT)
LOC_Os02g48730	LOC_Os02g48730.1 protein	2.9588	Os02g0719000	4330540		Similar to Rho GDP-dissociation inhibitor 1 (Rho GDI-1) (AtRhoGDI1)
LOC_Os02g48740	LOC_Os02g48740.1 protein	1.62596	Os02g0719100	4330541		Similar to Fimbrin/plastin-like (Fragment)
LOC_Os02g48800	LOC_Os02g48800.1 protein	1.72977	None		#N/A	#N/A
LOC_Os02g48830	LOC_Os02g48830.1 protein	2.191	Os02g0720200	4330548		Similar to 65kD microtubule associated protein
LOC_Os02g48840	LOC_Os02g48840.1 protein	2.0907	Os02g0720300	4330549	OsPP38	Protein-tyrosine phosphatase, dual specificity domain containing protein
LOC_Os02g48870	LOC_Os02g48870.1 protein	1.98998	Os02g0720600	4330552		Peptidase A1 domain containing protein
LOC_Os02g49050	LOC_Os02g49050.1 protein	1.9015	Os02g0722300	4330563		Nonaspanin (TM9SF) family protein
LOC_Os02g49080	LOC_Os02g49080.1 protein	1.50319	Os02g0722700	4330567		Similar to Nucleic acid binding protein
LOC_Os02g49090	LOC_Os02g49090.1 protein	1.78259	Os02g0722800	4330568	OsWD4-53	WD40 repeat-like domain containing protein
LOC_Os02g49150	LOC_Os02g49150.2 protein	1.81602	Os02g0723300	4330570		Hypothetical conserved gene
LOC_Os02g49190	LOC_Os02g49190.1 protein	1.63869	Os02g0723700			SNF5/SMARCB1/INI1 family protein
LOC_Os02g49270	LOC_Os02g49270.1 protein	2.87642	Os02g0724600	4330579		Similar to predicted protein
LOC_Os02g49320	LOC_Os02g49320.1 protein	1.62373	Os02g0725100	4330581		Thioredoxin fold domain containing protein
LOC_Os02g49360	LOC_Os02g49360.1 protein	2.09879	Os02g0725600			tRNA (guanine-N1-)-methyltransferase, eukaryotic domain containing protein
LOC_Os02g49440	LOC_Os02g49440.1 protein	1.50632	Os02g0726300	4330589	OsDof4	Similar to AOBP (Ascorbate oxidase promoter-binding protein)
LOC_Os02g49450	LOC_Os02g49450.1 protein	1.80446	Os02g0726400	4330590		BSD domain containing protein
LOC_Os02g49610	LOC_Os02g49610.1 protein	1.99191	Os02g0728600			Similar to H/ACA ribonucleoprotein complex subunit 2
LOC_Os02g49620	LOC_Os02g49620.1 protein	2.88867	Os02g0728700			Ribosomal RNA-processing protein 7 domain containing protein
LOC_Os02g49680	LOC_Os02g49680.1 protein	0.491313	Os02g0729400		OsStr11	Similar to Extracellular calcium sensing receptor
LOC_Os02g49720	LOC_Os02g49720.2 protein	1.88112	Os02g0730000	4330612	OsALDH2a	Similar to Mitochondrial aldehyde dehydrogenase
LOC_Os02g49780	LOC_Os02g49780.1 protein	1.53875	Os02g0730500	4330616		Fcf2 pre-rRNA processing domain containing protein
LOC_Os02g49870	LOC_Os02g49870.1 protein	0.439057	Os02g0731600			Similar to Threonine endopeptidase
LOC_Os02g49870	LOC_Os02g49870.1 protein	0.439057	Os02g0731800		#N/A	#N/A
LOC_Os02g49980	LOC_Os02g49980.1 protein	1.59045	Os02g0732500	4330631	OsARL1b	Similar to ADP-ribosylation factor-like protein
LOC_Os02g49992	LOC_Os02g49992.1 protein	1.67224	Os02g0732700	4330633	OsMed23_1	Mediator complex, subunit Med23 domain containing protein
LOC_Os02g50174	LOC_Os02g50174.1 protein	1.5822	Os02g0734600	4330644		Similar to EFA27 for EF hand, abscisic acid, 27kD
LOC_Os02g50200	LOC_Os02g50200.1 protein	1.90452	Os02g0734800			Protein of unknown function DUF26 domain containing protein
LOC_Os02g50230	LOC_Os02g50230.1 protein	1.61296	Os02g0735100	4330648		Peptidase M48, Ste24p family protein
LOC_Os02g50360	LOC_Os02g50360.1 protein	1.53148	Os02g0736500	4330658		Nicastrin family protein
LOC_Os02g50550	LOC_Os02g50550.1 protein	1.74651	Os02g0738900	4330669	BC3	Dynamin-related protein, Secondary cell wall cellulose biosynthesi
LOC_Os02g50620	LOC_Os02g50620.1 protein	1.58068	Os02g0739600	4330673	OsPDHE1-A	Similar to Pyruvate dehydrogenase E1 component alpha subunit, mitochondrial precursor (EC 1.2.4.1) (PDHE1-A)
LOC_Os02g50690	LOC_Os02g50690.1 protein	1.85693	Os02g0740400	4330677	OsGELP44	Similar to GSDL-motif lipase
LOC_Os02g50700	LOC_Os02g50700.1 protein	1.60589	Os02g0740500			Conserved hypothetical protein
LOC_Os02g50790	LOC_Os02g50790.2 protein	1.62492	Os02g0741400			Conserved hypothetical protein
LOC_Os02g50799	LOC_Os02g50799.1 protein	1.54484	Os02g0741500			Ribbon-helix-helix domain containing protein
LOC_Os02g50820	LOC_Os02g50820.1 protein	2.49877	Os02g0741800	4330689		Similar to Permease 1
LOC_Os02g51020	LOC_Os02g51020.1 protein	0.599566	Os02g0744000	4330704		Similar to NDF6 (NDH DEPENDENT FLOW 6)
LOC_Os02g51180	LOC_Os02g51180.1 protein	1.56572	Os02g0746000	4330720	CUL3A	Cullin3a protein, Regulation of cell death and immunit
LOC_Os02g51300	LOC_Os02g51300.1 protein	1.63283	Os02g0747600		AP2/EREBP#22	Similar to Transcription factor AP2D8
LOC_Os02g51410	LOC_Os02g51410.1 protein	1.53832	Os02g0749300		OsSK1	Similar to Shikimate kinase, chloroplast precursor (EC 2.7.1.71)
LOC_Os02g51430	LOC_Os02g51430.1 protein	1.67456	Os02g0749500			Similar to SEC6
LOC_Os02g51450	LOC_Os02g51450.2 protein	1.63248	Os02g0749800	4330735		Mitochodrial transcription termination factor-related family protein
LOC_Os02g51470	LOC_Os02g51470.1 protein	0.504285	Os02g0750100			Similar to ATP synthase
LOC_Os02g51470	LOC_Os02g51470.1 protein	0.504285	Os02g0750200		#N/A	#N/A
LOC_Os02g51480	LOC_Os02g51480.1 protein	1.73576	Os02g0750400			Pentatricopeptide repeat domain containing protein
LOC_Os02g51610	LOC_Os02g51610.1 protein	1.67226	Os02g0752000	4330749		Cellular retinaldehyde-binding/triple function, C-terminal domain containing protein
LOC_Os02g51750	LOC_Os02g51750.1 protein	2.63883	Os02g0753800	4330759	ANN2	Calcium-binding protein, Annexin, Heat and drought stress toleranc
LOC_Os02g51780	LOC_Os02g51780.1 protein	1.52013	Os02g0754100	4330762		Similar to S1 self-incompatibility locus-linked pollen G211 protein
LOC_Os02g51840	LOC_Os02g51840.3 protein	2.00313	Os02g0754800			Cytochrome oxidase assembly protein 1 domain containing protein
LOC_Os02g51850	LOC_Os02g51850.1 protein	1.67527	Os02g0754900		OsAPRL3	Similar to adenosine 5'-phosphosulfate reductase 4
LOC_Os02g51880	LOC_Os02g51880.1 protein	1.55323	Os02g0755200	4330771	OsHDMA72	Similar to amine oxidase family protein
LOC_Os02g52140	LOC_Os02g52140.2 protein	1.54341	Os02g0757900	4330785		Similar to Poly(A)-binding protein II-like
LOC_Os02g52150	LOC_Os02g52150.1 protein	2.22268	Os02g0758000	4330786	OsHsp24.1	Similar to Low molecular weight heat shock protein precursor (Mitochondrial small heat shock protein 22)
LOC_Os02g52250	LOC_Os02g52250.1 protein	1.69225	Os02g0759800	4330796	OsSKIPa	Similar to GAMYB-binding protein (Fragment)
LOC_Os02g52290	LOC_Os02g52290.1 protein	1.66781	Os02g0760300	4330800	OsFKBP12	Similar to Immunophilin
LOC_Os02g52314	LOC_Os02g52314.1 protein	1.70286	Os02g0760500	4330802		Similar to ER6 protein (Fragment)
LOC_Os02g52360	LOC_Os02g52360.1 protein	1.79218	Os02g0761100	4330806	OsCYP4b	Similar to Cyclophilin-40 (Expressed protein)
LOC_Os02g52370	LOC_Os02g52370.1 protein	1.78996	Os02g0761200	4330807		Armadillo-like helical domain containing protein
LOC_Os02g52430	LOC_Os02g52430.2 protein	1.59821	Os02g0761900			Dimethylmenaquinone methyltransferase family protein
LOC_Os02g52560	LOC_Os02g52560.1 protein	1.53662	Os02g0763200	4330821		Similar to Galactoside 2-alpha-L-fucosyltransferase (EC 2.4.1.69) (Xyloglucan alpha-(1,2)-fucosyltransferase) (AtFUT1)
LOC_Os02g52650	LOC_Os02g52650.1 protein	0.42712	Os02g0764500	4330828		Similar to Lhca5 protein
LOC_Os02g52770	LOC_Os02g52770.1 protein	2.29414	Os02g0766600	4330837		Protein of unknown function DUF1685 family protein
LOC_Os02g52860	LOC_Os02g52860.1 protein	1.59872	Os02g0767500	4330845	OsPT15	Mitochondrial phosphate transporter
LOC_Os02g52880	LOC_Os02g52880.1 protein	2.18743	Os02g0767700		OsERF#126	YbaK/aminoacyl-tRNA synthetase associated region domain containing protein
LOC_Os02g52920	LOC_Os02g52920.1 protein	2.18338	Os02g0768200	4330850		emp24/gp25L/p24 family protein
LOC_Os02g52960	LOC_Os02g52960.1 protein	1.58993	Os02g0768750			Hypothetical conserved gene
LOC_Os02g52960	LOC_Os02g52960.1 protein	1.58993	Os02g0768800		#N/A	#N/A
LOC_Os02g52960	LOC_Os02g52960.1 protein	1.58993	Os02g0768950		#N/A	#N/A
LOC_Os02g53060	LOC_Os02g53060.1 protein	2.81293	Os02g0770000	4330861	OSPBA1	Beta 1 subunit of 20S proteasome
LOC_Os02g53150	LOC_Os02g53150.1 protein	1.88781	Os02g0771200			Protein of unknown function DUF573 domain containing protein
LOC_Os02g53180	LOC_Os02g53180.1 protein	2.02873	Os02g0771600	4330873	ACO3	Similar to 1-aminocyclopropane-1-carboxylate oxidase (Fragment)
LOC_Os02g53230	LOC_Os02g53230.1 protein	1.77478	Os02g0772000			Similar to global transcription factor group
LOC_Os02g53270	LOC_Os02g53270.1 protein	1.52921	Os02g0772500	4330879		Protein of unknown function DUF1740 domain containing protein
LOC_Os02g53420	LOC_Os02g53420.1 protein	1.81129	Os02g0774300	4330888	OsISC23	Similar to Heat shock 70 kDa protein, mitochondrial precursor
LOC_Os02g53490	LOC_Os02g53490.1 protein	1.56212	Os02g0775100	4330894	MTP8.2	Manganese (Mn) cation diffusion facilitator (Mn-CDF), Mn toleranc
LOC_Os02g53500	LOC_Os02g53500.1 protein	1.82793	Os02g0775050			Hypothetical protein
LOC_Os02g53500	LOC_Os02g53500.1 protein	1.82793	Os02g0775200		#N/A	#N/A
LOC_Os02g54010	LOC_Os02g54010.1 protein	1.9563	Os02g0780700	4330922		Lipase, class 3 family protein
LOC_Os02g54110	LOC_Os02g54110.1 protein	3.08737	Os02g0782100			Uncharacterised domain NUC173 domain containing protein
LOC_Os02g54190	LOC_Os02g54190.1 protein	1.83097	Os02g0783000	4330938	OsPME9	Similar to Pectin methylesterase 5 (Fragment)
LOC_Os02g54360	LOC_Os02g54360.1 protein	1.63174	Os02g0784900	107278175		RmlC-like jelly roll fold domain containing protein
LOC_Os02g54470	LOC_Os02g54470.1 protein	2.10955	Os02g0785800	4330946		Similar to Ribosomal protein L35A
LOC_Os02g54500	LOC_Os02g54500.1 protein	1.69298	Os02g0786000			Similar to predicted protein
LOC_Os02g54560	LOC_Os02g54560.1 protein	0.542837	Os02g0786900	4330953	OsPR1#22	Similar to Pathogenesis-related protein PR-1 precursor
LOC_Os02g54600	LOC_Os02g54600.1 protein	1.76132	Os02g0787300	4330957	SMG1	Mitogen-activated protein kinase kinase 4, Defense response, Cell proliferation, Grain growt
LOC_Os02g54624	LOC_Os02g54624.1 protein	1.97102	Os02g0787500		OsRFPH2-22	Conserved hypothetical protein
LOC_Os02g54700	LOC_Os02g54700.2 protein	1.70968	Os02g0788400	4330963	eIF-3g	Similar to Eukaryotic translation initiation factor 3 subunit-like protein
LOC_Os02g54710	LOC_Os02g54710.1 protein	1.75702	Os02g0788500	4330964		Similar to DNA binding / nuclease
LOC_Os02g54730	LOC_Os02g54730.1 protein	1.55758	Os02g0788800		OsATL9	Amino acid transporter, transmembrane domain containing protein
LOC_Os02g54820	LOC_Os02g54820.1 protein	1.90546	Os02g0790500		OsTPS5	Hypothetical protein
LOC_Os02g54910	LOC_Os02g54910.1 protein	1.79035	Os02g0791800	4330978	OsATG18a	WD-40 repeat containing protein
LOC_Os02g55010	LOC_Os02g55010.1 protein	1.51163	Os02g0793100	4330985		Armadillo-type fold domain containing protein
LOC_Os02g55030	LOC_Os02g55030.1 protein	2.01739	Os02g0793300	4330987		Similar to Nudix hydrolase 3 (EC 3.6.1.-) (AtNUDT3). Splice isoform 2
LOC_Os02g55110	LOC_Os02g55110.1 protein	2.47968	Os02g0794300			Protein of unknown function DUF566 family protein
LOC_Os02g55134	LOC_Os02g55134.1 protein	2.04921	Os02g0794600	4330997		Similar to Copper chaperone COX17-1
LOC_Os02g55260	LOC_Os02g55260.2 protein	5.29383	Os02g0795900	4331005	OsRH1	Similar to DEAD box-like RNA helicase (Fragment)
LOC_Os02g55310	LOC_Os02g55310.1 protein	1.73847	Os02g0796400	4331007		Pentatricopeptide repeat domain containing protein
LOC_Os02g55410	LOC_Os02g55410.1 protein	1.89464	Os02g0797400	4331016	OsMCM5	MCM family protein
LOC_Os02g55440	LOC_Os02g55440.2 protein	2.08032	Os02g0797700	4331019		Nonaspanin (TM9SF) family protein
LOC_Os02g55530	LOC_Os02g55530.1 protein	1.93036	Os02g0798700			Neurochondrin domain containing protein
LOC_Os02g55640	LOC_Os02g55640.1 protein	1.84047	Os02g0800100	4331035		Proteasome maturation factor UMP1 family protein
LOC_Os02g55940	LOC_Os02g55940.1 protein	1.50602	Os02g0803200	4331046		Similar to 30S ribosomal protein S15
LOC_Os02g55950	LOC_Os02g55950.1 protein	1.85306	Os02g0803250			Similar to predicted protein
LOC_Os02g55970	LOC_Os02g55970.1 protein	1.55656	Os02g0803300	4331047		Epsin-like, N-terminal domain containing protein
LOC_Os02g56000	LOC_Os02g56000.1 protein	1.85233	Os02g0803700	4331050	TBPOs-1	Similar to 26S protease regulatory subunit 6A homolog (TAT-binding protein homolog 1) (TBP-1)
LOC_Os02g56030	LOC_Os02g56030.1 protein	0.614491	Os02g0804400	4331057		Conserved hypothetical protein
LOC_Os02g56100	LOC_Os02g56100.1 protein	1.96991	Os02g0804900	4331059	RNRL2	Ribonucleotide reductase, Chloroplast biogenesi
LOC_Os02g56110	LOC_Os02g56110.1 protein	1.52306	Os02g0805000			Armadillo-type fold domain containing protein
LOC_Os02g56130	LOC_Os02g56130.1 protein	1.76568	Os02g0805200	4331062	OsPCNA	Proliferating cell nuclear antigen (PCNA) (Cyclin)
LOC_Os02g56190	LOC_Os02g56190.1 protein	1.6357	Os02g0805700	4331067		Conserved hypothetical protein
LOC_Os02g56210	LOC_Os02g56210.1 protein	1.68201	Os02g0805900	4331069	OsDCP2	NUDIX hydrolase, core domain containing protein
LOC_Os02g56270	LOC_Os02g56270.1 protein	1.51123	Os02g0806600	9268417		ENTH/VHS domain containing protein
LOC_Os02g56480	LOC_Os02g56480.1 protein	2.13948	Os02g0809100			Conserved hypothetical protein
LOC_Os02g56530	LOC_Os02g56530.1 protein	1.87257	Os02g0810000			Non-protein coding transcript
LOC_Os02g56530	LOC_Os02g56530.1 protein	1.87257	Os02g0810100		#N/A	#N/A
LOC_Os02g56560	LOC_Os02g56560.1 protein	1.64117	Os02g0810400	4331096		Similar to Dual specificity kinase 1
LOC_Os02g56740	LOC_Os02g56740.1 protein	1.71318	Os02g0812400	4331104		Trimeric LpxA-like domain containing protein
LOC_Os02g56840	LOC_Os02g56840.1 protein	1.87085	Os02g0813350	4331110	OsFbox12	Cyclin-like F-box domain containing protein
LOC_Os02g56850	LOC_Os02g56850.1 protein	1.52284	Os02g0813500	4331112	OsGR2	Glutathione reductase, cytosolic (EC 1.8.1.7) (GR) (GRase)
LOC_Os02g56990	LOC_Os02g56990.1 protein	2.22244	Os02g0815000	9267955	OsRPL37	Similar to 60S ribosomal protein L37 (G1.16)
LOC_Os02g57020	LOC_Os02g57020.1 protein	0.495719	Os02g0815300			Hypothetical protein
LOC_Os02g57030	LOC_Os02g57030.1 protein	0.50298	Os02g0815400	4331129		Similar to Tfm5 protein
LOC_Os02g57040	LOC_Os02g57040.2 protein	1.87202	Os02g0815500	4331130		Alcohol dehydrogenase class III (EC 1.1.1.1) (Glutathione-dependent formaldehyde dehydrogenase) (EC 1.2.1.1) (FDH) (FALDH) (GSH-FDH)
LOC_Os02g57050	LOC_Os02g57050.1 protein	2.62295	Os02g0815600	4331131		Diphthamide synthesis, DHP1 domain containing protein
LOC_Os02g57070	LOC_Os02g57070.1 protein	1.97073	Os02g0815800	4331133		S1, RNA binding domain containing protein
LOC_Os02g57110	LOC_Os02g57110.1 protein	2.07526	Os02g0816200	4331137	OsGELP45	Lipase, GDSL domain containing protein
LOC_Os02g57120	LOC_Os02g57120.1 protein	1.93701	Os02g0816300			Armadillo-type fold domain containing protein
LOC_Os02g57150	LOC_Os02g57150.1 protein	2.44748	Os02g0816500			Tubulin binding cofactor A family protein
LOC_Os02g57180	LOC_Os02g57180.1 protein	1.58299	Os02g0816800	4331143	OsNDUFA9	Mitochondrial complex I subunit, Mitochondrial NADH dehydrogenase [ubiquinone] 1 alpha subcomplex subunit, Embryo development, Endosperm starch synthesi
LOC_Os02g57220	LOC_Os02g57220.1 protein	1.53945	Os02g0817200	4331146	OsWD4-59	WD-40 repeat containing protein
LOC_Os02g57240	LOC_Os02g57240.1 protein	1.65489	Os02g0817500	4331148	KOB1	Potassium channel, voltage-dependent, beta subunit, KCNAB-related domain containing protein
LOC_Os02g57260	LOC_Os02g57260.1 protein	2.2329	Os02g0817700	4331150	OsI57	Similar to 3-ketoacyl-CoA thiolase (Fragment)
LOC_Os02g57280	LOC_Os02g57280.1 protein	0.63004	Os02g0818000		OsCBSX3	Similar to Brown planthopper-induced resistance protein 1
LOC_Os02g57390	LOC_Os02g57390.1 protein	1.5212	Os02g0819300			Hypothetical conserved gene
LOC_Os02g57480	LOC_Os02g57480.1 protein	1.66545	Os02g0820400	4331169		Transferase family protein
LOC_Os02g57540	LOC_Os02g57540.1 protein	1.52206	Os02g0821200			Ribosomal protein L28e domain containing protein
LOC_Os02g57620	LOC_Os02g57620.1 protein	1.79728	Os02g0822100	4331184	SIET3	Divalent ion symporter domain containing protein
LOC_Os02g57630	LOC_Os02g57630.2 protein	1.90798	Os02g0822200	4331185		Peptidase C12, ubiquitin carboxyl-terminal hydrolase 1 family protein
LOC_Os02g57640	LOC_Os02g57640.1 protein	1.5669	Os02g0822300			Similar to RNA-binding protein Nova-1
LOC_Os02g57830	LOC_Os02g57830.2 protein	2.04863	Os02g0824400	4331205		Conserved hypothetical protein
LOC_Os02g57990	LOC_Os02g57990.1 protein	1.61736	Os02g0826200	4331215		NAD(P)-binding domain containing protein
LOC_Os02g58020	LOC_Os02g58020.1 protein	1.85314	Os02g0826500		OsABCF1	ABC transporter-like domain containing protein
LOC_Os02g58090	LOC_Os02g58090.1 protein	1.54643	Os02g0827300	4331222		Protein of unknown function DUF382 domain containing protein
LOC_Os02g58120	LOC_Os02g58120.1 protein	1.83125	Os02g0827600	4331225		Protein of unknown function DUF3531 domain containing protein
LOC_Os02g58170	LOC_Os02g58170.1 protein	2.34566	Os02g0828500	4331231		Tetratricopeptide-like helical domain containing protein
LOC_Os02g58170	LOC_Os02g58170.1 protein	2.34566	Os02g0828533		#N/A	#N/A
LOC_Os02g58300	LOC_Os02g58300.1 protein	2.10477	Os02g0829800			Pentatricopeptide repeat domain containing protein
LOC_Os02g58310	LOC_Os02g58310.2 protein	0.578997	Os02g0829850			Conserved hypothetical protein
LOC_Os02g58450	LOC_Os02g58450.1 protein	1.83849	Os02g0831000			Hypothetical protein
LOC_Os02g58450	LOC_Os02g58450.1 protein	1.83849	Os02g0831200		#N/A	#N/A
LOC_Os02g58490	LOC_Os02g58490.1 protein	1.62525	Os02g0831600	4331253	OsAGO1c	AGO1 homologous protein
LOC_Os02g58510	LOC_Os02g58510.1 protein	1.55855	Os02g0831800	4331255		Similar to 3-hydroxy-3-methylglutaryl-coenzyme A reductase 2
LOC_Os02g58590	LOC_Os02g58590.1 protein	1.55237	Os02g0832800	4331263	GlcNAc-TI	Similar to Alpha-1,3-mannosyl-glycoprotein beta-1,2-N- acetylglucosaminyltransferase (EC 2.4.1.101)
LOC_Os02g58640	LOC_Os02g58640.1 protein	2.11604	Os02g0833300	4331267		Ubiquitin-conjugating enzyme/RWD-like domain containing protein
LOC_Os02g58720	LOC_Os02g58720.2 protein	1.59121	Os02g0833900	4331271	prx32	Similar to Peroxidase 64 precursor (EC 1.11.1.7) (Atperox P64) (PRXR4) (ATP17a)
LOC_Os03g01110	LOC_Os03g01110.1 protein	1.52846	Os03g0100500			Similar to TAR RNA loop binding protein (TAR (HIV) RNA binding protein 1)
LOC_Os03g01150	LOC_Os03g01150.1 protein	1.59263	Os03g0101100			Similar to Palmitoyl-protein thioesterase-like
LOC_Os03g01170	LOC_Os03g01170.1 protein	1.5781	Os03g0101300	4331286	FCO1	Similar to Hexose transporter
LOC_Os03g01210	LOC_Os03g01210.1 protein	2.02475	Os03g0101800	4331291		Similar to DUF614 containing protein
LOC_Os03g01250	LOC_Os03g01250.1 protein	1.73111	Os03g0102400	4331297		Similar to 2-phosphoglycerate kinase-related
LOC_Os03g01420	LOC_Os03g01420.1 protein	1.66053	Os03g0104400			Protein of unknown function DUF1677, Oryza sativa domain containing protein
LOC_Os03g01490	LOC_Os03g01490.1 protein	2.01778	Os03g0105300			Protein of unknown function DUF1677, Oryza sativa domain containing protein
LOC_Os03g01530	LOC_Os03g01530.1 protein	2.17599	Os03g0105600	4331315	OsTUB2	Tubulin beta-1 chain (Beta-1 tubulin)
LOC_Os03g01600	LOC_Os03g01600.1 protein	2.17011	Os03g0106400	4331322		Similar to Branched-chain-amino-acid aminotransferase 5, chloroplast precursor (EC 2.6.1.42) (Atbcat-5)
LOC_Os03g01660	LOC_Os03g01660.1 protein	1.62704	Os03g0107000			Similar to ASK20
LOC_Os03g01710	LOC_Os03g01710.1 protein	1.75027	Os03g0107400			Prefoldin domain containing protein
LOC_Os03g01730	LOC_Os03g01730.1 protein	1.77213	Os03g0107600	4331331		Similar to H0716A07.6 protein
LOC_Os03g01810	LOC_Os03g01810.1 protein	1.96842	Os03g0108400	4331337		Similar to Charged multivesicular body protein 3
LOC_Os03g01900	LOC_Os03g01900.1 protein	2.32393	Os03g0109500	4331346	OsRPS17	Similar to 40S ribosomal protein S17-4
LOC_Os03g01910	LOC_Os03g01910.1 protein	1.77692	Os03g0109600	4331347	Osj3g1BTF3	Similar to Transcription factor homolog BTF3-like protein
LOC_Os03g02070	LOC_Os03g02070.1 protein	2.74457	Os03g0111400	4331363		Heavy metal transport/detoxification protein domain containing protein
LOC_Os03g02150	LOC_Os03g02150.1 protein	1.54922	Os03g0112101			Similar to Adaptin N terminal region family protein, expressed
LOC_Os03g02150	LOC_Os03g02150.1 protein	1.54922	Os03g0112400		#N/A	#N/A
LOC_Os03g02260	LOC_Os03g02260.1 protein	1.84288	Os03g0113700	4331379	OsISC24	Similar to Heat shock 70 kDa protein, mitochondrial precursor
LOC_Os03g02270	LOC_Os03g02270.1 protein	1.72861	Os03g0113800	4331380		Tetratricopeptide-like helical domain containing protein
LOC_Os03g02310	LOC_Os03g02310.1 protein	1.73084	Os03g0114200	4331384		Nucleic acid-binding, OB-fold domain containing protein
LOC_Os03g02380	LOC_Os03g02380.1 protein	2.82818	Os03g0114800	4331389		Protein of unknown function DUF791 family protein
LOC_Os03g02390	LOC_Os03g02390.1 protein	1.62224	Os03g0114900	4331390		Similar to putaive mitochondrial inner membrane protein [Oryza sativa (japonica cultivar-group)]
LOC_Os03g02420	LOC_Os03g02420.1 protein	3.32569	Os03g0115200	4331393		Similar to Partner of Nob1; Pno1p; Yor145cp like KH domain containing protein, transcripts identified by EST
LOC_Os03g02450	LOC_Os03g02450.2 protein	2.06838	Os03g0115500	9271623		Similar to pyridoxine 5'-phosphate oxidase-related
LOC_Os03g02514	LOC_Os03g02514.1 protein	1.60633	Os03g0116300	9267662		Similar to catalytic/ hydrolase
LOC_Os03g02514	LOC_Os03g02514.1 protein	1.60633	Os03g0116316		#N/A	#N/A
LOC_Os03g02540	LOC_Os03g02540.1 protein	1.84669	Os03g0116500	4331403		Constitutive photomorphogenic 11
LOC_Os03g02610	LOC_Os03g02610.1 protein	1.5728	Os03g0117300			Beta-glucanase family protein
LOC_Os03g02710	LOC_Os03g02710.1 protein	1.76698	Os03g0118800	4331418		Similar to Hydroxymethylglutaryl-CoA synthase
LOC_Os03g02720	LOC_Os03g02720.1 protein	1.88716	Os03g0118900			Armadillo-type fold domain containing protein
LOC_Os03g02920	LOC_Os03g02920.1 protein	1.77548	Os03g0121200	4331437	prx33	Similar to Peroxidase 1
LOC_Os03g03140	LOC_Os03g03140.1 protein	2.47346	Os03g0123200	4331447		Nucleotide-binding, alpha-beta plait domain containing protein
LOC_Os03g03290	LOC_Os03g03290.1 protein	1.54804	Os03g0124300	4331455		Similar to ATP binding protein
LOC_Os03g03390	LOC_Os03g03390.1 protein	3.24157	Os03g0125300	4331462		D111/G-patch domain containing protein
LOC_Os03g03420	LOC_Os03g03420.1 protein	1.73406	Os03g0125700	4331465		Ubiquitin ligase, Det1/DDB1-complexing domain containing protein
LOC_Os03g03430	LOC_Os03g03430.1 protein	1.79935	Os03g0125800	4331466	OsCBSDUF3	Cystathionine beta-synthase, core domain containing protein
LOC_Os03g03460	LOC_Os03g03460.1 protein	1.80713	Os03g0126100			Similar to Arabidopsis thaliana DNA, 40 kb surrounding ACS1 locus
LOC_Os03g03550	LOC_Os03g03550.1 protein	3.60725	Os03g0127500	4331479	OsbZIP25	bZIP transcription factor, bZIP-1 domain containing protein
LOC_Os03g03600	LOC_Os03g03600.1 protein	1.85786	Os03g0128000	4331484	OsFLA2	FAS1 domain domain containing protein
LOC_Os03g03610	LOC_Os03g03610.2 protein	1.56091	Os03g0128100		OsGSL1	Similar to Callose synthase 1 catalytic subunit
LOC_Os03g03610	LOC_Os03g03610.2 protein	1.56091	Os03g0128200		#N/A	#N/A
LOC_Os03g03650	LOC_Os03g03650.1 protein	1.80118	Os03g0128500	4331489	OsPoldelta2	Similar to DNA polymerase delta small subunit (EC 2.7.7.7)
LOC_Os03g03670	LOC_Os03g03670.1 protein	0.510703	Os03g0128800			Conserved hypothetical protein
LOC_Os03g03710	LOC_Os03g03710.1 protein	2.07645	Os03g0129200			Similar to predicted protein
LOC_Os03g03720	LOC_Os03g03720.1 protein	0.481408	Os03g0129300	4331495	GADPH	Similar to Glyceraldehyde-3-phosphate dehydrogenase (EC 1.2.1.13) (Fragment)
LOC_Os03g03820	LOC_Os03g03820.1 protein	1.81316	Os03g0130400	4331502		Adenylate kinase, subfamily protein
LOC_Os03g03830	LOC_Os03g03830.1 protein	1.62988	Os03g0130500	4331503		EF hand domain containing protein
LOC_Os03g03870	LOC_Os03g03870.1 protein	1.6284	Os03g0130800			Bromodomain containing protein
LOC_Os03g03980	LOC_Os03g03980.1 protein	2.01614	Os03g0131800			Similar to H0211B05.1 protein
LOC_Os03g04000	LOC_Os03g04000.1 protein	1.66868	Os03g0132000	4331515	OsACS4	Similar to 4-coumarate-CoA ligase-like protein
LOC_Os03g04020	LOC_Os03g04020.1 protein	1.96564	Os03g0132200	4331516	OsEXPLA1	Expansin-like protein A
LOC_Os03g04050	LOC_Os03g04050.1 protein	1.77563	Os03g0132800	4331518	OsRLCK98	Similar to protein kinase-like protein [Oryza sativa (japonica cultivar-group)]
LOC_Os03g04110	LOC_Os03g04110.1 protein	1.54229	Os03g0133400		CEBIP	Peptidoglycan-binding Lysin subgroup domain containing protein
LOC_Os03g04169	LOC_Os03g04169.1 protein	1.62724	Os03g0134300	4331530		Similar to ATP phosphoribosyl transferase
LOC_Os03g04340	LOC_Os03g04340.1 protein	1.94618	Os03g0136200	4331540	Ossmt2-1	24-methylenesterol C-methyltransferase 2 (EC 2.1.1.143) (24-sterol C- methyltransferase 2) (Sterol-C-methyltransferase 2)
LOC_Os03g04410	LOC_Os03g04410.1 protein	1.54433	Os03g0136900	4331547		Similar to Aconitate hydratase, cytoplasmic (EC 4.2.1.3) (Citrate hydro-lyase) (Aconitase)
LOC_Os03g04570	LOC_Os03g04570.1 protein	1.78988	Os03g0138700	4331559		TGF-beta receptor, type I/II extracellular region family protein
LOC_Os03g04580	LOC_Os03g04580.1 protein	1.71736	Os03g0138900			Conserved hypothetical protein
LOC_Os03g04750	LOC_Os03g04750.1 protein	2.39132	Os03g0141000			60S ribosomal protein L21
LOC_Os03g04920	LOC_Os03g04920.1 protein	1.78095	Os03g0142800	4331585	OsABCC13	Similar to MRP-like ABC transporter
LOC_Os03g04940	LOC_Os03g04940.1 protein	1.97815	Os03g0143000			Conserved hypothetical protein
LOC_Os03g04960	LOC_Os03g04960.2 protein	1.82414	Os03g0143300			Similar to Cysteinyl-tRNA synthetase
LOC_Os03g04970	LOC_Os03g04970.1 protein	1.90688	Os03g0143400	4331590	htpB	Similar to mitochondrial chaperonin-60 [Oryza sativa (japonica cultivar-group)]
LOC_Os03g04980	LOC_Os03g04980.1 protein	1.70724	Os03g0143600	4331591		Similar to Inhibitor of growth protein 1. Splice isoform 2
LOC_Os03g05110	LOC_Os03g05110.1 protein	1.58125	Os03g0144800	4331598		Similar to Xyloglucan galactosyltransferase KATAMARI 1 (EC 2.4.1.-) (MURUS3 protein)
LOC_Os03g05200	LOC_Os03g05200.1 protein	1.73996	Os03g0145500			DENN domain containing protein
LOC_Os03g05260	LOC_Os03g05260.1 protein	2.10264	Os03g0145800			Ankyrin repeat containing protein
LOC_Os03g05290	LOC_Os03g05290.1 protein	2.00378	Os03g0146100	4331608	OsTIP1	Tonoplast intrinsic protein (Tonoplast water channel)
LOC_Os03g05300	LOC_Os03g05300.1 protein	1.5846	Os03g0146300	4331610	Orysa	Similar to Cyclin-dependent kinases regulatory subunit
LOC_Os03g05320	LOC_Os03g05320.1 protein	0.586327	Os03g0146500	4331612		Similar to (RAP Annotation release2) Galactose-binding like domain containing protein
LOC_Os03g05390	LOC_Os03g05390.5 protein	2.38587	Os03g0147400	4331617	SIET4	Divalent ion symporter domain containing protein
LOC_Os03g05420	LOC_Os03g05420.1 protein	1.98533	Os03g0147700			Similar to EMB1691 (EMBRYO DEFECTIVE 1691); S-adenosylmethionine-dependent methyltransferase/ methyltransferase/ nucleic acid binding
LOC_Os03g05540	LOC_Os03g05540.2 protein	1.66915	Os03g0149400			Tetratricopeptide-like helical domain containing protein
LOC_Os03g05710	LOC_Os03g05710.1 protein	2.04358	Os03g0151600	4331643		Acyl-CoA N-acyltransferase domain containing protein
LOC_Os03g05720	LOC_Os03g05720.1 protein	2.46734	Os03g0151700	4331644	OsWD4-63	Similar to WD repeat protein (Fragment)
LOC_Os03g05730	LOC_Os03g05730.1 protein	1.61819	Os03g0151800	4331645	OsCDC48	Similar to Cell division control protein 48 homolog A (AtCDC48a)
LOC_Os03g05780	LOC_Os03g05780.1 protein	1.94055	Os03g0152400	4331650	OsACS1	Similar to 4-coumarate--CoA ligase-like 1
LOC_Os03g05806	LOC_Os03g05806.1 protein	1.75618	Os03g0152700			Pseudouridine synthase domain containing protein
LOC_Os03g05812	LOC_Os03g05812.1 protein	1.50971	Os03g0152800			Conserved hypothetical protein
LOC_Os03g05830	LOC_Os03g05830.1 protein	1.60322	Os03g0153000			Similar to cDNA clone:001-019-C07, full insert sequence
LOC_Os03g05920	LOC_Os03g05920.1 protein	1.78435	Os03g0154100			Aromatic-ring hydroxylase family protein
LOC_Os03g05980	LOC_Os03g05980.1 protein	2.06724	Os03g0154700	9268088	OsRPS9-2	Similar to 40S ribosomal protein S9
LOC_Os03g06190	LOC_Os03g06190.1 protein	1.51781	Os03g0157800	4331677		Hypothetical conserved gene
LOC_Os03g06200	LOC_Os03g06200.1 protein	2.20432	Os03g0157900	9270715		Phosphoserine aminotransferase, chloroplast precursor (EC 2.6.1.52) (PSAT)
LOC_Os03g06220	LOC_Os03g06220.1 protein	1.79779	Os03g0158200	4331680	OsRH38	DEAD-like helicase, N-terminal domain containing protein
LOC_Os03g06240	LOC_Os03g06240.1 protein	2.07989	Os03g0158500	4331683		YT521-B-like protein family protein
LOC_Os03g06290	LOC_Os03g06290.1 protein	1.59342	Os03g0158700		OsSub27	Similar to PA domain containing protein, expressed
LOC_Os03g06360	LOC_Os03g06360.1 protein	1.80135	Os03g0159600	4331691	OsLEA3	Similar to Rab28 protein
LOC_Os03g06410	LOC_Os03g06410.1 protein	1.77875	Os03g0160100	4331696	ACDR1	Mitogen-activated protein kinase kinase kinase (MAPKKK), Disease resistance, Defense/stress respons
LOC_Os03g06670	LOC_Os03g06670.1 protein	1.62521	Os03g0162200	4331710		Similar to Histone H2A
LOC_Os03g06720	LOC_Os03g06720.1 protein	0.612006	Os03g0163100	4331717		Protein of unknown function DUF1012 family protein
LOC_Os03g06880	LOC_Os03g06880.1 protein	1.92102	Os03g0164700	4331726		Carbohydrate/purine kinase domain containing protein
LOC_Os03g06980	LOC_Os03g06980.1 protein	2.64976	Os03g0166000	4331735		Alba, DNA/RNA-binding protein family protein
LOC_Os03g07130	LOC_Os03g07130.1 protein	1.80649	Os03g0167500	4331745	OsRMR3	Splicing isoform of OsRMR
LOC_Os03g07150	LOC_Os03g07150.1 protein	1.67913	Os03g0167700	4331747	OsPP44	Similar to Serine/threonine protein phosphatase PP2A-3 catalytic subunit (EC 3.1.3.16)
LOC_Os03g07300	LOC_Os03g07300.1 protein	0.586624	Os03g0169100	4331761	RPE	Ribulose-phosphate 3-epimerase, chloroplast precursor (EC 5.1.3.1) (Pentose-5-phosphate 3-epimerase) (PPE) (RPE) (R5P3E)
LOC_Os03g07580	LOC_Os03g07580.1 protein	1.54822	Os03g0172000	4331780	MOS3/SAR3	Peptidase S59, nucleoporin family protein
LOC_Os03g07840	LOC_Os03g07840.1 protein	1.96272	Os03g0174500	4331792		Similar to Adenylosuccinate synthetase, chloroplast precursor (EC 6.3.4.4) (IMP-- aspartate ligase) (AdSS) (AMPSase) (Fragment)
LOC_Os03g07960	LOC_Os03g07960.1 protein	0.576359	Os03g0176700	9266492		Conserved hypothetical protein
LOC_Os03g08020	LOC_Os03g08020.1 protein	3.49117	Os03g0177500	4331811	rfa4*	EF-1 alpha
LOC_Os03g08100	LOC_Os03g08100.1 protein	1.73473	Os03g0178400	4331817		Alpha/beta hydrolase fold-1 domain containing protein
LOC_Os03g08140	LOC_Os03g08140.1 protein	2.33282	Os03g0179000			Similar to Tubulin-tyrosine ligase family protein, expressed
LOC_Os03g08270	LOC_Os03g08270.3 protein	1.52639	Os03g0180300	4331827		Similar to Ataxin-2 C-terminal region family protein, expressed
LOC_Os03g08280	LOC_Os03g08280.1 protein	1.74123	Os03g0180400	4331828	OsPAA1	Proteasome subunit alpha type 6 (EC 3.4.25.1) (20S proteasome alpha subunit A) (20S proteasome subunit alpha-1)
LOC_Os03g08390	LOC_Os03g08390.1 protein	1.92952	Os03g0181800	4331838		Protein of unknown function DUF936, plant family protein
LOC_Os03g08440	LOC_Os03g08440.1 protein	1.50664	Os03g0182600	9272225		Ribosomal protein S2 family protein
LOC_Os03g08450	LOC_Os03g08450.1 protein	1.54375	Os03g0182700	4331842	eIF-3k	Eukaryotic translation initiation factor 3 subunit 12 (eIF-3 p25) (eIF3k)
LOC_Os03g08550	LOC_Os03g08550.1 protein	1.81335	Os03g0183800	4331852		Similar to Leucine-rich repeat transmembrane protein kinase 1 (Fragment)
LOC_Os03g08770	LOC_Os03g08770.1 protein	1.86659	Os03g0186800	4331873		Modifier of rudimentary, Modr family protein
LOC_Os03g08790	LOC_Os03g08790.1 protein	2.28101	Os03g0186900	4331874	OsAP25	Radc1
LOC_Os03g08800	LOC_Os03g08800.1 protein	1.68832	Os03g0186950			Similar to CUTA
LOC_Os03g08810	LOC_Os03g08810.1 protein	2.48147	Os03g0187000	4331875		Similar to EMB514
LOC_Os03g08860	LOC_Os03g08860.1 protein	1.75784	Os03g0187600	4331881		GRAM domain containing protein
LOC_Os03g08870	LOC_Os03g08870.1 protein	2.04721	Os03g0187700	4331882		Target SNARE coiled-coil region domain containing protein
LOC_Os03g09020	LOC_Os03g09020.1 protein	2.28676	Os03g0189600	4331894		Similar to Alcohol dehydrogenase
LOC_Os03g09140	LOC_Os03g09140.1 protein	1.61763	Os03g0191400		OsRab6B2	Small GTPase, Regulation of iron homeostasi
LOC_Os03g09210	LOC_Os03g09210.1 protein	1.59354	Os03g0192400	4331914		GRIM-19 family protein
LOC_Os03g09250	LOC_Os03g09250.1 protein	2.28799	Os03g0192700	4331917	OsINO1	Similar to Myo-inositol-1-phosphate synthase
LOC_Os03g09840	LOC_Os03g09840.1 protein	1.54071	Os03g0194100	4331924		C2 calcium-dependent membrane targeting domain containing protein
LOC_Os03g09860	LOC_Os03g09860.1 protein	1.60695	Os03g0194400	4331926		Similar to Acetyltransferase, GNAT family protein, expressed
LOC_Os03g09870	LOC_Os03g09870.1 protein	1.72833	Os03g0194500	4331927		Similar to Protein translocase/ protein transporter
LOC_Os03g10070	LOC_Os03g10070.1 protein	1.94965	Os03g0196900			Similar to TFIIB-related protein (Fragment)
LOC_Os03g10120	LOC_Os03g10120.2 protein	1.90976	Os03g0197400	4331948		Similar to COP9 signalosome complex subunit 4 (Signalosome subunit 4) (Constitutive photomorphogenesis protein 8) (FUSCA protein 4) (FUSCA4) (AtS4)
LOC_Os03g10190	LOC_Os03g10190.1 protein	2.25512	Os03g0198400			Similar to Seryl-tRNA synthetase (EC 6.1.1.11) (Serine--tRNA ligase) (SerRS) (Fragment)
LOC_Os03g10240	LOC_Os03g10240.2 protein	1.60799	Os03g0199100	4331959		Protein of unknown function DUF677 family protein
LOC_Os03g10340	LOC_Os03g10340.1 protein	1.91968	Os03g0200500	4331966	cyc7	40S ribosomal protein S3a (CYC07 protein)
LOC_Os03g10360	LOC_Os03g10360.1 protein	1.7142	Os03g0200700	4331968		Similar to Surfeit 1 homolog
LOC_Os03g10400	LOC_Os03g10400.2 protein	1.86135	Os03g0201100		OsCYP65	Similar to Cyclophilin-like protein PPIL3b
LOC_Os03g10410	LOC_Os03g10410.1 protein	2.07894	Os03g0201200	4331973		Conserved hypothetical protein
LOC_Os03g10450	LOC_Os03g10450.1 protein	1.73929	Os03g0201600	4331975		Similar to ischemia/reperfusion inducible protein
LOC_Os03g10590	LOC_Os03g10590.1 protein	1.63058	Os03g0203000	4331981		Similar to somatic embryogenesis related protein
LOC_Os03g10600	LOC_Os03g10600.1 protein	1.86935	Os03g0203100			Nucleolar 27S pre-rRNA processing, Urb2/Npa2, C-terminal domain containing protein
LOC_Os03g10620	LOC_Os03g10620.1 protein	1.63916	Os03g0203200	4331983	D14	Alpha/beta hydrolase, Strigolactone receptor, Strigolactone perception, Reguration of shoot branchin
LOC_Os03g10620	LOC_Os03g10620.1 protein	1.63916	Os03g0203451		#N/A	#N/A
LOC_Os03g10640	LOC_Os03g10640.1 protein	1.57988	Os03g0203700	4331984	osACA1	Similar to Calcium-transporting ATPase 2, plasma membrane-type (EC 3.6.3.8) (Ca(2+)-ATPase isoform 2)
LOC_Os03g10710	LOC_Os03g10710.1 protein	3.13624	Os03g0204432			Non-protein coding transcript
LOC_Os03g10710	LOC_Os03g10710.1 protein	3.13624	Os03g0204500		#N/A	#N/A
LOC_Os03g10750	LOC_Os03g10750.1 protein	1.53381	Os03g0205000	4331989		Ubiquitin system component Cue domain containing protein
LOC_Os03g10850	LOC_Os03g10850.1 protein	1.51898	Os03g0206300		OsISC35	Similar to augmenter of liver regeneration
LOC_Os03g10940	LOC_Os03g10940.1 protein	1.54978	Os03g0207300	4332003	CK2alpha3	Similar to Casein kinase II alpha subunit
LOC_Os03g11010	LOC_Os03g11010.1 protein	1.5836	Os03g0208500	4332012	NRAMP2	Integral membrane protein
LOC_Os03g11200	LOC_Os03g11200.1 protein	1.52823	Os03g0210400	4332022		RNA-processing protein, HAT helix domain containing protein
LOC_Os03g11220	LOC_Os03g11220.1 protein	2.03948	Os03g0210600			Conserved hypothetical protein
LOC_Os03g11250	LOC_Os03g11250.1 protein	0.588174	Os03g0210900			Similar to predicted protein
LOC_Os03g11320	LOC_Os03g11320.1 protein	1.81642	Os03g0211700	4332033		Glycoside hydrolase family 79, N-terminal protein
LOC_Os03g11340	LOC_Os03g11340.1 protein	1.65163	Os03g0211900	4332035		Leucine-rich repeat, N-terminal domain containing protein
LOC_Os03g11410	LOC_Os03g11410.1 protein	1.74732	Os03g0212700	4332040		Similar to Cytochrome C reductase-processing peptidase subunit I, MPP subunit I, P55
LOC_Os03g11470	LOC_Os03g11470.1 protein	1.68945	Os03g0213400			Similar to RNA helicase
LOC_Os03g11570	LOC_Os03g11570.1 protein	1.50865	Os03g0214600	4332055	OsRpn9b	Similar to 26S proteasome subunit-like protein (26S proteasome subunit RPN9a)
LOC_Os03g11580	LOC_Os03g11580.1 protein	1.62665	Os03g0214900	4332056		Conserved hypothetical protein
LOC_Os03g11720	LOC_Os03g11720.1 protein	1.74753	Os03g0216600			Similar to Alpha-glucosidase (EC 3.2.1.20)
LOC_Os03g11990	LOC_Os03g11990.3 protein	2.29845	Os03g0219500	4332085	OsISC4	Similar to Uv-induced protein uvi31
LOC_Os03g12000	LOC_Os03g12000.1 protein	1.55478	Os03g0219700	4332087	OsRH47B	DEAD-like helicase, N-terminal domain containing protein
LOC_Os03g12030	LOC_Os03g12030.1 protein	1.59637	Os03g0220100	4332090	WSL4	beta-ketoacyl-CoA synthase, Homolog of Arabidopsis CER6, Leaf cuticular wax synthesis, Very-long-chain fatty acid (VLCFA) elongatio
LOC_Os03g12140	LOC_Os03g12140.1 protein	1.95167	Os03g0221500	4332097		Glycoside hydrolase, family 17 protein
LOC_Os03g12230	LOC_Os03g12230.2 protein	1.87024	Os03g0222600			Similar to caleosin
LOC_Os03g12236	LOC_Os03g12236.1 protein	1.68962	Os03g0222700			Molecular chaperone, heat shock protein, Hsp40, DnaJ domain containing protein
LOC_Os03g12236	LOC_Os03g12250.1 protein	1.78836	Os03g0222800		#N/A	#N/A
LOC_Os03g12290	LOC_Os03g12290.1 protein	1.50271	Os03g0223400	4332108	GLN1	Cytosolic glutamine synthetase, Ammonium assimilatio
LOC_Os03g12300	LOC_Os03g12300.1 protein	1.65231	Os03g0223700	4332109		Armadillo-like helical domain containing protein
LOC_Os03g12350	LOC_Os03g12350.4 protein	1.74903	Os03g0224200	4332111	ORR1	B-type response regulator, Cytokinin signalin
LOC_Os03g12370	LOC_Os03g12370.1 protein	1.84951	Os03g0224700	4332113	HSFA9	Similar to HSP protein (Fragment)
LOC_Os03g12450	LOC_Os03g12450.1 protein	1.76914	Os03g0225500	4332118	NUP133	Nucleoporin, Common symbiosis signaling (SYM) pathwa
LOC_Os03g12460	LOC_Os03g12460.1 protein	1.8275	Os03g0225600			Conserved oligomeric complex COG6 family protein
LOC_Os03g12510	LOC_Os03g12510.1 protein	3.37819	Os03g0226200	4332123	HB2	Non-symbiotic hemoglobin 2 (rHb2
LOC_Os03g12610	LOC_Os03g12610.1 protein	1.54881	Os03g0227300	4332131		5'-3' exonuclease domain containing protein
LOC_Os03g12620	LOC_Os03g12620.1 protein	1.60473	Os03g0227400			Similar to glucan endo-1,3-beta-glucosidase 7
LOC_Os03g13220	LOC_Os03g13220.1 protein	1.52614	Os03g0235100	4332176		Similar to Pg4
LOC_Os03g13380	LOC_Os03g13380.1 protein	1.70913	Os03g0237000	4332186		Nonaspanin (TM9SF) family protein
LOC_Os03g13540	LOC_Os03g13540.1 protein	1.55551	Os03g0238600	4332195	OsPAP3c	Similar to Purple acid phosphatase
LOC_Os03g13614	LOC_Os03g13614.1 protein	1.71516	Os03g0239400	4332201	OsbZIP26	Similar to Transcription factor HBP-1a(C14)
LOC_Os03g13760	LOC_Os03g13760.1 protein	1.80784	Os03g0240800	4332206		Similar to AGL157Cp
LOC_Os03g13770	LOC_Os03g13770.1 protein	1.59523	Os03g0240900	4332207		Tubulin/FtsZ, GTPase domain containing protein
LOC_Os03g13800	LOC_Os03g13800.1 protein	3.42476	Os03g0241200	4332209		Similar to NHP2-like protein 1 (High mobility group-like nuclear protein 2 homolog 1) ([U4/U6.U5] tri-snRNP 15.5 kDa protein
LOC_Os03g13970	LOC_Os03g13970.1 protein	1.9073	Os03g0243300	4332222	OsS5a	Similar to 26S proteasome non-ATPase regulatory subunit 4 (26S proteasome regulatory subunit S5A) (Multiubiquitin chain binding protein)
LOC_Os03g14010	LOC_Os03g14010.1 protein	2.15835	Os03g0243700			Similar to Glycosyl hydrolase family 10 protein, expressed
LOC_Os03g14030	LOC_Os03g14030.1 protein	2.14847	Os03g0243900	4332226		Similar to Thaumatin-like protein
LOC_Os03g14050	LOC_Os03g14050.1 protein	2.10765	Os03g0244200	4332228		Similar to thaumatin-like protein 1
LOC_Os03g14250	LOC_Os03g14250.1 protein	1.69663	Os03g0246500	4332240		Protein of unknown function DUF869, plant family protein
LOC_Os03g14260	LOC_Os03g14260.2 protein	1.60612	Os03g0246800			Similar to Guanine nucleotide-exchange protein GEP2
LOC_Os03g14450	LOC_Os03g14450.1 protein	2.2216	Os03g0248600	4332253	OsEno2	Similar to Enolase 2 (EC 4.2.1.11) (2-phosphoglycerate dehydratase 2) (2-phospho- D-glycerate hydro-lyase 2)
LOC_Os03g14520	LOC_Os03g14520.1 protein	2.21036	Os03g0249300	4332256		Nucleotide-sensitive chloride conductance regulator family protein
LOC_Os03g14530	LOC_Os03g14530.1 protein	1.81944	Os03g0249400	4332257		Similar to 40S ribosomal protein S20 (S22) (Fragment)
LOC_Os03g14580	LOC_Os03g14580.1 protein	3.00761	Os03g0249900	4332261		Conserved hypothetical protein
LOC_Os03g14642	LOC_Os03g14642.1 protein	2.57642	None		#N/A	#N/A
LOC_Os03g14669	LOC_Os03g14669.1 protein	0.429211	Os03g0251350	9266204	OSHAP5C	Histone-fold domain containing protein
LOC_Os03g14690	LOC_Os03g14690.1 protein	1.69724	Os03g0251500	4332270		Similar to T-cell immune regulator 1 transcript variant 3 (Fragment)
LOC_Os03g14800	LOC_Os03g14800.3 protein	1.75235	Os03g0252800	4332274		Pyridoxal phosphate-dependent transferase, major region, subdomain 1 domain containing protein
LOC_Os03g14860	LOC_Os03g14860.1 protein	1.63412	Os03g0253500	4332277		D111/G-patch domain containing protein
LOC_Os03g15050	LOC_Os03g15050.2 protein	1.97253	Os03g0255500	4332293		Similar to Phosphoenolpyruvate carboxykinase 4 (EC 4.1.1.49) (Fragment)
LOC_Os03g15120	LOC_Os03g15120.1 protein	1.8632	Os03g0256400	4332296		Similar to Imidazole glycerol phosphate synthase hisHF, chloroplast precursor (IGP synthase) (ImGP synthase) (IGPS) [Includes: Glutamine amidotransferase (EC 2.4.2.-); Cyclase (EC 4.1.3.-)]
LOC_Os03g15290	LOC_Os03g15290.1 protein	0.485595	Os03g0258500	9271973	ATG6C	ATG6/Beclin-1 protein, Abiotic stresses (heat,cold and drought) and hormone (abscisic acid) respons
LOC_Os03g15370	LOC_Os03g15370.1 protein	3.47927	Os03g0259500			Similar to Ubiquitin
LOC_Os03g15390	LOC_Os03g15390.1 protein	2.10908	Os03g0259700	4332314		Protein of unknown function DUF1630 family protein
LOC_Os03g15480	LOC_Os03g15480.1 protein	1.54036	Os03g0261500	4332320	OsDjC26	Heat shock protein DnaJ, N-terminal domain containing protein
LOC_Os03g15560	LOC_Os03g15560.1 protein	1.804	Os03g0262100	4332324	OsMed9_2	Exon junction complex, Pym domain containing protein
LOC_Os03g15590	LOC_Os03g15590.1 protein	1.5347	Os03g0262400	4332327		Similar to Eukaryotic translation initiation factor 4E type 3 (eIF4E type 3) (eIF-4E type 3) (mRNA cap-binding protein type 3) (Novel cap-binding protein) (nCBP)
LOC_Os03g15650	LOC_Os03g15650.1 protein	1.68177	Os03g0262900	4332330	GLUP6/GEF	Hypothetical conserved gene
LOC_Os03g15700	LOC_Os03g15700.1 protein	1.98501	Os03g0263500	4332334		Similar to Splicing factor 3A subunit 2 (Spliceosome associated protein 62) (SAP 62) (SF3a66)
LOC_Os03g15800	LOC_Os03g15800.1 protein	1.70961	Os03g0264700	4332343		WD40 repeat-like domain containing protein
LOC_Os03g15960	LOC_Os03g15960.1 protein	2.20413	Os03g0266300	4332357	Oshsp17.9A	Class I low-molecular-weight heat shock protein 17.9
LOC_Os03g16000	LOC_Os03g16000.1 protein	1.52928	Os03g0266700	4332358		Src homology-3 domain containing protein
LOC_Os03g16050	LOC_Os03g16050.1 protein	0.571581	Os03g0267300	4332364	OsCFR	Similar to Fructose-1,6-bisphosphatase, chloroplast precursor (EC 3.1.3.11) (D- fructose-1,6-bisphosphate 1-phosphohydrolase) (FBPase)
LOC_Os03g16110	LOC_Os03g16110.1 protein	1.8903	Os03g0268000		OsPP1	Protein phosphatas
LOC_Os03g16120	LOC_Os03g16120.1 protein	1.62028	Os03g0268100	4332370		Similar to T-snare
LOC_Os03g16130	LOC_Os03g16130.1 protein	1.53483	Os03g0268200	9268534	OsATG1a	Serine/threonine protein kinase domain containing protein
LOC_Os03g16369	LOC_Os03g16369.1 protein	2.2559	Os03g0270200	4332383		Hypothetical conserved gene
LOC_Os03g16430	LOC_Os03g16430.1 protein	1.83628	Os03g0271100	4332388	OsSIG2B	Similar to Sigma factor SIG2B
LOC_Os03g16730	LOC_Os03g16730.1 protein	1.87835	Os03g0274700			Conserved hypothetical protein
LOC_Os03g16824	LOC_Os03g16824.1 protein	1.91901	Os03g0275900	4332412	OsPUB1	Similar to Spotted leaf protein 11 (Spotted leaf11) (Cell death-related protein SPL11)
LOC_Os03g16860	LOC_Os03g16860.1 protein	1.52679	Os03g0276500	4332413	OsHsp71.1	Similar to Heat shock protein 70
LOC_Os03g16950	LOC_Os03g16950.1 protein	1.92046	Os03g0277600	4332422	OsDUF26	Similar to (clone wusl1032) mRNA sequence
LOC_Os03g16980	LOC_Os03g16980.1 protein	1.7827	Os03g0278000	4332424	UXS	UDP-glucuronic acid decarboxylase
LOC_Os03g17000	LOC_Os03g17000.3 protein	1.61923	Os03g0278200	4332425		NAD(P)-binding domain containing protein
LOC_Os03g17010	LOC_Os03g17010.1 protein	1.60684	Os03g0278300	4332426		Similar to ALY protein
LOC_Os03g17020	LOC_Os03g17020.1 protein	1.70666	Os03g0278400	4332427		Similar to ADP ribosylation GTPase-like protein (Fragment)
LOC_Os03g17070	LOC_Os03g17070.1 protein	0.469325	Os03g0278900	4332431		ATPase, F0 complex, subunit B/B', bacterial and chloroplast family protein
LOC_Os03g17120	LOC_Os03g17120.1 protein	1.58186	Os03g0279400	4332434		Similar to predicted protein
LOC_Os03g17140	LOC_Os03g17140.1 protein	2.80738	Os03g0279600	4332435		Conserved hypothetical protein
LOC_Os03g17170	LOC_Os03g17170.1 protein	1.66434	Os03g0279900	4332437		Nitric oxide synthase-interacting domain containing protein
LOC_Os03g17174	LOC_Os03g17174.1 protein	0.528574	Os03g0279950		PsbP	Similar to Kinase binding protein (Fragment)
LOC_Os03g17180	LOC_Os03g17180.1 protein	1.53606	Os03g0280000	4332438	OsABCB13	Similar to MDR-like ABC transporter
LOC_Os03g17370	LOC_Os03g17370.1 protein	0.499011	Os03g0282100		OsABCG6	Similar to ATPase, coupled to transmembrane movement of substances
LOC_Os03g17450	LOC_Os03g17450.1 protein	2.0932	Os03g0282900	4332453		Conserved hypothetical protein
LOC_Os03g17560	LOC_Os03g17560.1 protein	2.41461	Os03g0284000	4332463		Hypothetical conserved gene
LOC_Os03g17600	LOC_Os03g17600.1 protein	0.522854	Os03g0284600	4332468		Thioredoxin-like fold domain containing protein
LOC_Os03g17660	LOC_Os03g17660.1 protein	0.449761	Os03g0285100	4332473		Conserved hypothetical protein
LOC_Os03g17660	LOC_Os03g17660.1 protein	0.449761	Os03g0285166		#N/A	#N/A
LOC_Os03g17690	LOC_Os03g17690.1 protein	2.18812	Os03g0285700	4332474	OsAPX1	Similar to L-ascorbate peroxidase
LOC_Os03g17730	LOC_Os03g17730.1 protein	1.5854	Os03g0286200	4332477		Similar to Prephenate dehydratase-like
LOC_Os03g17740	LOC_Os03g17740.1 protein	1.78401	Os03g0286300	4332478		Similar to Phosphate/phosphoenolpyruvate translocator protein-like
LOC_Os03g17780	LOC_Os03g17780.1 protein	1.56625	Os03g0286800		OsWD4-67	Similar to WD and tetratricopeptide repeats protein 1
LOC_Os03g17860	LOC_Os03g17860.1 protein	1.8855	Os03g0287900	4332486	PDIL5	Similar to Protein disulfide isomerase
LOC_Os03g17910	LOC_Os03g17910.1 protein	1.58356	Os03g0288400	4332489		Similar to kinesin like protein
LOC_Os03g17930	LOC_Os03g17930.2 protein	1.95938	Os03g0288600	4332491	SIP6	Muscle derived-like protein
LOC_Os03g17940	LOC_Os03g17940.1 protein	1.75345	Os03g0288700	4332492		Phosphatidic acid phosphatase type 2/haloperoxidase domain containing protein
LOC_Os03g17950	LOC_Os03g17950.1 protein	1.87241	Os03g0288800	4332493		Cytochrome B561-related domain containing protein
LOC_Os03g18130	LOC_Os03g18130.1 protein	2.7039	Os03g0291500	4332506	ASN1	Asparagine synthetase, Biosynthesis of asparagine following the supply of ammoniu
LOC_Os03g18140	LOC_Os03g18140.1 protein	1.57154	Os03g0291800	4332508	OsTBL15	Similar to ESK1 (ESKIMO 1)
LOC_Os03g18160	LOC_Os03g18160.1 protein	1.93451	Os03g0292200			Adenine nucleotide translocator 1 domain containing protein
LOC_Os03g18180	LOC_Os03g18180.1 protein	1.80957	Os03g0292800	4332513		Similar to Ran binding protein 1 homolog
LOC_Os03g18210	LOC_Os03g18210.1 protein	2.16679	Os03g0293400			Similar to basic helix-loop-helix family protein
LOC_Os03g18220	LOC_Os03g18220.1 protein	2.07953	Os03g0293500	4332519	pdc2*	Similar to Pyruvate decarboxylase isozyme 2
LOC_Os03g18310	LOC_Os03g18310.1 protein	1.85079	Os03g0294200	4332523	OsF2KP2	Similar to Fructose-6-phosphate-2-kinase/fructose-2, 6-bisphosphatase
LOC_Os03g18380	LOC_Os03g18380.3 protein	1.75108	Os03g0294900			Similar to Ubiquitin-activating enzyme E1
LOC_Os03g18410	LOC_Os03g18410.1 protein	2.98816	Os03g0295400	4332531		Similar to Ferredoxin
LOC_Os03g18500	LOC_Os03g18500.2 protein	1.86432	Os03g0296300	4332537		Similar to mitochondrial import inner membrane translocase subunit tim22
LOC_Os03g18510	LOC_Os03g18510.1 protein	2.13763	Os03g0296400	4332538		Similar to Eukaryotic translation initiation factor 2 subunit 1 (Eukaryotic translation initiation factor 2 alpha subunit) (eIF-2-alpha) (EIF- 2alpha) (EIF-2A) (Fragment)
LOC_Os03g18560	LOC_Os03g18560.1 protein	1.52855	Os03g0297000	4332544		Protein of unknown function DUF538 family protein
LOC_Os03g18580	LOC_Os03g18580.1 protein	2.06814	Os03g0297300			Similar to 40S ribosomal protein S7
LOC_Os03g18630	LOC_Os03g18630.1 protein	1.54379	Os03g0297800			Similar to Leucine Rich Repeat family protein, expressed
LOC_Os03g18690	LOC_Os03g18690.1 protein	1.84497	Os03g0298400	4332553	OSRPT2B	Similar to 26S proteasome subunit 4-like protein (26S proteasome subunit AtRPT2a)
LOC_Os03g18720	LOC_Os03g18720.1 protein	1.80357	Os03g0298800	4332557		Similar to Spliceosomal protein
LOC_Os03g18810	LOC_Os03g18810.1 protein	1.50835	Os03g0299900	4332563	OsAGD2	Similar to Plastid aminotransferase (Fragment)
LOC_Os03g18830	LOC_Os03g18830.1 protein	1.66797	Os03g0300200	4332566		Similar to Ubiquitin-specific protease 16
LOC_Os03g18840	LOC_Os03g18840.1 protein	2.3214	Os03g0300300	4332567	OsWD4-68	WD40 repeat-like domain containing protein
LOC_Os03g18850	LOC_Os03g18850.1 protein	2.32429	Os03g0300400	4332568	JIOsPR1	Pathogen-related protein (JIOsPR10)
LOC_Os03g18880	LOC_Os03g18880.1 protein	2.91214	Os03g0300700	4332571		Retrotransposon gag protein family protein
LOC_Os03g18970	LOC_Os03g18970.1 protein	1.68951	Os03g0301700	4332577	OsPP2C33	Similar to Calmodulin-binding protein phosphatase
LOC_Os03g19250	LOC_Os03g19250.1 protein	1.80367	Os03g0305100	4332593		Similar to AMP-binding protein
LOC_Os03g19300	LOC_Os03g19300.1 protein	1.7644	Os03g0305700			Similar to Peptide chain release factor 2 (Fragment)
LOC_Os03g19380	LOC_Os03g19380.1 protein	0.507473	Os03g0306800	4332603	OsCP12	Similar to CP12 (Fragment)
LOC_Os03g19390	LOC_Os03g19390.1 protein	2.17843	Os03g0306900	4332604		Haem oxygenase-like, multi-helical domain containing protein
LOC_Os03g19580	LOC_Os03g19580.1 protein	1.82109	Os03g0309000			Virulence factor, pectin lyase fold family protein
LOC_Os03g19680	LOC_Os03g19680.1 protein	1.72711	Os03g0310400			Crotonase, core domain containing protein
LOC_Os03g19690	LOC_Os03g19690.1 protein	1.88915	Os03g0310500			CAP, conserved site domain containing protein
LOC_Os03g19760	LOC_Os03g19760.1 protein	0.596444	Os03g0311300			Similar to HAD-superfamily hydrolase, subfamily IA, variant 3 containing protein, expressed
LOC_Os03g19870	LOC_Os03g19870.1 protein	1.89233	Os03g0312600	4332638		Similar to XPA-binding protein 1 (HUSSY-23)
LOC_Os03g19960	LOC_Os03g19960.1 protein	1.92663	Os03g0314100		PRP-22	DEAD-like helicase, N-terminal domain containing protein
LOC_Os03g20020	LOC_Os03g20020.1 protein	1.59033	Os03g0314800	4332650	OsNIN1	Plant neutral invertase family protein
LOC_Os03g20170	LOC_Os03g20170.1 protein	1.75281	Os03g0316900	4332655	OsABCI15	Similar to NBD-like protein
LOC_Os03g20370	LOC_Os03g20370.1 protein	1.56217	Os03g0319300	4332664	OsCam1-1	Calmodulin, Ca<sup>2+</sup> sensor, Ca<sup>2+</sup> signalling, Thermotoleranc
LOC_Os03g20420	LOC_Os03g20420.1 protein	1.95272	Os03g0320100			Alpha-L-arabinofuranosidase, C-terminal domain containing protein
LOC_Os03g20460	LOC_Os03g20460.1 protein	2.02217	Os03g0320900	4332674	V2	Guanylate kinase family protein
LOC_Os03g20530	LOC_Os03g20530.1 protein	1.66576	Os03g0321500	4332679		Protein of unknown function DUF632 domain containing protein
LOC_Os03g20560	LOC_Os03g20560.1 protein	1.64907	Os03g0321800	4332681		Similar to WRKY transcription factor 55
LOC_Os03g20630	LOC_Os03g20630.2 protein	1.91845	Os03g0322500	4332685		Similar to 14 kDa zinc-binding protein (Protein kinase C inhibitor) (PKCI)
LOC_Os03g20670	LOC_Os03g20670.1 protein	1.76188	Os03g0322800	4332687		Engulfment and cell motility, ELM domain containing protein
LOC_Os03g20750	LOC_Os03g20750.1 protein	1.61614	Os03g0323800	4332694	NP1977	Similar to ISP42-like protein (Fragment)
LOC_Os03g20860	LOC_Os03g20860.1 protein	1.74541	Os03g0324800	4332700		Conserved hypothetical protein
LOC_Os03g21040	LOC_Os03g21040.2 protein	2.31513	Os03g0327600	4332715		Ricin B-related lectin domain containing protein
LOC_Os03g21080	LOC_Os03g21080.1 protein	1.54159	Os03g0328000			Dedicator of cytokinesis family protein
LOC_Os03g21270	LOC_Os03g21270.1 protein	1.79023	Os03g0330300	4332729		Similar to cDNA clone:001-032-H02, full insert sequence (Fragment)
LOC_Os03g21380	LOC_Os03g21380.2 protein	1.81249	Os03g0331700	4332731	OsCML27	Similar to cDNA clone:002-120-A09, full insert sequence
LOC_Os03g21460	LOC_Os03g21460.1 protein	1.84813	Os03g0332400	4332736	GLYII-2	Glyoxalase II (S-2-hydroxyacyl glutathione hydrolase), Salinity adaptation, Abiotic stress toleranc
LOC_Os03g21520	LOC_Os03g21520.1 protein	1.67351	Os03g0333000	4332741		Conserved hypothetical protein
LOC_Os03g21530	LOC_Os03g21530.1 protein	2.93849	Os03g0333100	4332742		Protein of unknown function DUF663 domain containing protein
LOC_Os03g21540	LOC_Os03g21540.1 protein	1.58445	Os03g0333200	4332743	DRUS1	Receptor-like kinase, Control of reproductive growth and development, Repression of cell deat
LOC_Os03g21550	LOC_Os03g21550.2 protein	1.93934	Os03g0333300	4332744		Similar to Eukaryotic translation initiation factor 2 beta subunit (eIF-2-beta) (P38)
LOC_Os03g21560	LOC_Os03g21560.1 protein	0.508725	Os03g0333400	4332745		Similar to photosystem II 11 kD protein
LOC_Os03g21690	LOC_Os03g21690.1 protein	1.94719	Os03g0334800	4332753		Transmembrane receptor, eukaryota domain containing protein
LOC_Os03g21740	LOC_Os03g21740.1 protein	1.66656	Os03g0335600			Similar to Valyl-tRNA synthetase
LOC_Os03g21810	LOC_Os03g21810.1 protein	1.86696	Os03g0336300	4332762		Peptidase M16, core domain containing protein
LOC_Os03g21830	LOC_Os03g21830.1 protein	2.23393	Os03g0336500			Similar to Protein LRP16
LOC_Os03g21890	LOC_Os03g21890.1 protein	1.81673	Os03g0337500		OsHAK8	Similar to Potassium transporter
LOC_Os03g21940	LOC_Os03g21940.1 protein	1.95533	Os03g0337800	4332773	RPL19.3	Similar to 60S ribosomal protein L19 (Fragment)
LOC_Os03g21950	LOC_Os03g21950.1 protein	1.82489	Os03g0337900	4332774		Similar to predicted protein
LOC_Os03g21990	LOC_Os03g21990.1 protein	1.70448	Os03g0339100	4332781	OsWD4-7	Similar to PRL1 protein
LOC_Os03g22010	LOC_Os03g22010.1 protein	0.298489	Os03g0339300	4332782	PRX41	Hypothetical conserved gene
LOC_Os03g22120	LOC_Os03g22120.1 protein	2.39279	Os03g0340500	4332788	SUS4	Similar to Sucrose synthase (EC 2.4.1.13)
LOC_Os03g22140	LOC_Os03g22140.1 protein	1.85164	Os03g0340700	4332790		Tetratricopeptide-like helical domain containing protein
LOC_Os03g22180	LOC_Os03g22180.1 protein	2.47248	Os03g0341100	4332793		Similar to 60S ribosomal protein L18
LOC_Os03g22270	LOC_Os03g22270.1 protein	1.516	Os03g0342900	4332799		Dormancyauxin associated family protein
LOC_Os03g22320	LOC_Os03g22320.1 protein	2.13421	Os03g0343300	4332800		Small-subunit processome, Utp14 domain containing protein
LOC_Os03g22340	LOC_Os03g22340.1 protein	2.26616	Os03g0343500	4332802	BIP18	Similar to 60S ribosomal protein L22-2
LOC_Os03g22350	LOC_Os03g22350.1 protein	1.91971	Os03g0343700			Brix domain containing protein
LOC_Os03g22380	LOC_Os03g22380.1 protein	1.72354	Os03g0344100	4332806		Similar to ASF/SF2-like pre-mRNA splicing factor SRP32''
LOC_Os03g22450	LOC_Os03g22450.1 protein	1.88637	Os03g0345100		Arf75	Similar to auxin response factor 75
LOC_Os03g22570	LOC_Os03g22570.1 protein	1.67808	Os03g0347200			Armadillo-type fold domain containing protein
LOC_Os03g22690	LOC_Os03g22690.1 protein	1.5534	Os03g0349000	4332834		Nucleoporin interacting component family protein
LOC_Os03g22730	LOC_Os03g22730.1 protein	3.22718	Os03g0350100	4332840	BIP11	SAR DNA-binding protein-2
LOC_Os03g22740	LOC_Os03g22740.1 protein	3.20807	Os03g0350300	4332841	BIP12	Similar to SAR DNA-binding protein-like protein
LOC_Os03g22780	LOC_Os03g22780.1 protein	0.541269	Os03g0351200	4332843	OsDVR	NAD(P)-binding domain containing protein
LOC_Os03g22810	LOC_Os03g22810.1 protein	1.82189	Os03g0351500	4332846	SODCC1	Similar to Superoxide dismutase
LOC_Os03g22880	LOC_Os03g22880.1 protein	4.32461	Os03g0352300	4332851		Similar to Nucleolar protein
LOC_Os03g22890	LOC_Os03g22890.1 protein	2.32771	Os03g0352400	4332852	OsNug2	Similar to Nucleolar GTP-binding protein 2 (Autoantigen NGP-1)
LOC_Os03g22950	LOC_Os03g22950.1 protein	1.65807	Os03g0352800	4332854		Similar to Acyl carrier protein 1 (EC 1.6.5.3) (EC 1.6.99.3)
LOC_Os03g23020	LOC_Os03g23020.1 protein	2.84311	Os03g0353500	4332857		Nucleolar protein 12 domain containing protein
LOC_Os03g23920	LOC_Os03g23920.1 protein	1.6993	Os03g0355300	4332862	OsWD4-71	Protein of unknown function DUF1618 domain containing protein
LOC_Os03g23935	LOC_Os03g23935.1 protein	1.603	Os03g0355200	4332861	OsWD4-72	WD40 repeat-like domain containing protein
LOC_Os03g23950	LOC_Os03g23950.1 protein	1.62494	Os03g0355600			Similar to Adapter-related protein complex 2 beta 1 subunit (Beta-adaptin) (Plasma membrane adaptor HA2/AP2 adaptin beta subunit) (Clathrin assembly protein complex 2 beta large chain) (AP105B) (Fragment)
LOC_Os03g23970	LOC_Os03g23970.2 protein	1.79222	Os03g0355800	4332866		Similar to Diphthine synthase (EC 2.1.1.98) (Diphthamide biosynthesis methyltransferase)
LOC_Os03g23980	LOC_Os03g23980.1 protein	0.659855	Os03g0355900			Hypothetical conserved gene
LOC_Os03g24180	LOC_Os03g24180.1 protein	1.50958	Os03g0356638		Spin6.2	Similar to Rho GTPase activator
LOC_Os03g24220	LOC_Os03g24220.1 protein	1.55398	Os03g0356700	4332869	VLN2	Villin, villin/gelsolin superfamily protein, Actin binding protein, Regulation of plant architectur
LOC_Os03g24380	LOC_Os03g24380.1 protein	1.70082	Os03g0358100	4332876	OsGpx2	Similar to Glutathione peroxidase
LOC_Os03g24450	LOC_Os03g24450.1 protein	1.63232	Os03g0359000		OsPOP8	Ubiquitin interacting motif domain containing protein
LOC_Os03g24580	LOC_Os03g24580.1 protein	1.63487	Os03g0360500	4332886		Protein of unknown function DUF1077 family protein
LOC_Os03g24600	LOC_Os03g24600.1 protein	1.95088	Os03g0360700	4332888	OsMSR1	Similar to Protein-methionine-S-oxide reductase, PilB family
LOC_Os03g24830	LOC_Os03g24830.1 protein	1.95769	Os03g0363200	9267940		Protein of unknown function DUF455 family protein
LOC_Os03g24860	LOC_Os03g24860.1 protein	0.553722	Os03g0363500	4332900		Similar to Vacuolar monosaccharide symporter 1
LOC_Os03g24890	LOC_Os03g24890.1 protein	1.54564	Os03g0363800	4332903		Similar to SC35-like splicing factor SCL28, 28 kD
LOC_Os03g24920	LOC_Os03g24920.1 protein	1.91284	Os03g0364000	4332905		Similar to ubiquitin-like protein
LOC_Os03g25050	LOC_Os03g25050.1 protein	1.83836	Os03g0366000	4332912		Similar to Chaperonin
LOC_Os03g25140	LOC_Os03g25140.1 protein	1.51865	Os03g0367000	4332918	OsFKBP72	Similar to Pasticcino 1-A
LOC_Os03g25260	LOC_Os03g25260.1 protein	1.72587	Os03g0367800	4332920		Similar to Zinc finger HIT domain-containing protein 1
LOC_Os03g25390	LOC_Os03g25390.2 protein	1.82613	Os03g0369800	4332931	OsNPSN12	Similar to Novel plant SNARE 13 (AtNPSN13)
LOC_Os03g25430	LOC_Os03g25430.1 protein	1.67584	Os03g0370250			Protein of unknown function DUF573 family protein
LOC_Os03g25450	LOC_Os03g25450.1 protein	2.78252	Os03g0370500	4332935		Similar to H/ACA ribonucleoprotein complex subunit 4 (EC 5.4.99.-) (Nucleolar protein NAP57 homolog) (Nopp-140 associated protein of 57 kDa homolog) (AtNAP57)
LOC_Os03g25620	LOC_Os03g25620.1 protein	3.10263	Os03g0372700	4332942		Similar to low temperature viability protein
LOC_Os03g25720	LOC_Os03g25720.1 protein	1.77109	Os03g0374100	4332947		Hepatocellular carcinoma-associated antigen 59 family protein
LOC_Os03g25770	LOC_Os03g25770.1 protein	1.82686	Os03g0374575	9268085		Similar to RNA recognition motif family protein, expressed
LOC_Os03g25930	LOC_Os03g25930.1 protein	1.57721	Os03g0376000	4332955		emp24/gp25L/p24 family protein
LOC_Os03g25940	LOC_Os03g25940.4 protein	3.21268	Os03g0376100			Similar to Cystathionine gamma-synthase (Fragment)
LOC_Os03g25970	LOC_Os03g25970.1 protein	1.55543	Os03g0376800	4332959		K Homology, type 1, subgroup domain containing protein
LOC_Os03g25980	LOC_Os03g25980.2 protein	2.12499	Os03g0376900	4332960		Nucleotide-binding, alpha-beta plait domain containing protein
LOC_Os03g26030	LOC_Os03g26030.1 protein	1.87907	Os03g0377500			Nuclear control of ATP synthase 2 domain containing protein
LOC_Os03g26220	LOC_Os03g26220.1 protein	2.23204	Os03g0379400	4332973		Hypothetical conserved gene
LOC_Os03g26440	LOC_Os03g26440.1 protein	1.78451	Os03g0381100			Similar to Pseudouridylate synthase
LOC_Os03g26460	LOC_Os03g26460.1 protein	1.69918	Os03g0381300	4332979		CS domain domain containing protein
LOC_Os03g26630	LOC_Os03g26630.1 protein	1.59457	Os03g0383800	4332988		Similar to SAP domain containing protein, expressed
LOC_Os03g26820	LOC_Os03g26820.1 protein	0.588952	Os03g0385400	4332993	OsLLA1	Bifunctional inhibitor/plant lipid transfer protein/seed storage domain containing protein
LOC_Os03g26860	LOC_Os03g26860.1 protein	1.68682	Os03g0385900	4332994	rps11	Mitochondrial ribosomal protein S11 (Nuclear encoded)
LOC_Os03g27010	LOC_Os03g27010.1 protein	1.65657	Os03g0387800	4333003		Similar to mRNA, clone: RTFL01-43-H20
LOC_Os03g27040	LOC_Os03g27040.1 protein	1.70213	Os03g0388100	4333006		ATPase, P-type, K/Mg/Cd/Cu/Zn/Na/Ca/Na/H-transporter domain containing protein
LOC_Os03g27250	LOC_Os03g27250.1 protein	1.99794	Os03g0389900	4333015	JMJ711	Cyclin-like F-box domain containing protein
LOC_Os03g27260	LOC_Os03g27260.1 protein	2.18407	Os03g0390000	4333016	RPS6	Similar to Ribosomal protein s6 RPS6-2
LOC_Os03g27310	LOC_Os03g27310.2 protein	1.52363	Os03g0390600	4333019		Similar to Histone H3 (Fragment)
LOC_Os03g27320	LOC_Os03g27320.1 protein	1.69805	Os03g0390700	4333020		Similar to Transthyretin-like protein
LOC_Os03g27450	LOC_Os03g27450.1 protein	1.55334	Os03g0392300	4333026	OsGB1a	Similar to GTP-binding protein-like
LOC_Os03g27780	LOC_Os03g27780.1 protein	1.63859	Os03g0395100	107275976	OsPP53	Protein phosphatase 2C domain containing protein
LOC_Os03g27820	LOC_Os03g27820.1 protein	1.77304	Os03g0395600			Conserved hypothetical protein
LOC_Os03g27840	LOC_Os03g27840.1 protein	1.63685	Os03g0395900	9268882		Hypothetical conserved gene
LOC_Os03g27970	LOC_Os03g27970.1 protein	1.51311	Os03g0397500	4333045	OsWD4-74	WD40 repeat-like domain containing protein
LOC_Os03g27990	LOC_Os03g27990.1 protein	1.85353	Os03g0397700			Protein kinase, catalytic domain domain containing protein
LOC_Os03g28160	LOC_Os03g28160.1 protein	2.16738	Os03g0399800			Mannose-binding lectin domain containing protein
LOC_Os03g28330	LOC_Os03g28330.4 protein	2.16437	Os03g0401300	4333062	SUS1	Sucrose synthase 2 (EC 2.4.1.13) (Sucrose-UDP glucosyltransferase 2)
LOC_Os03g28330	LOC_Os03g28330.4 protein	2.16437	Os03g0401366		#N/A	#N/A
LOC_Os03g28400	LOC_Os03g28400.1 protein	1.81171	Os03g0401900		#N/A	#N/A
LOC_Os03g28400	LOC_Os03g28400.1 protein	1.81171	Os03g0402000		#N/A	#N/A
LOC_Os03g28960	LOC_Os03g28960.1 protein	2.08351	Os03g0403100	4333066		Similar to DNA-directed RNA polymerase subunit
LOC_Os03g29170	LOC_Os03g29170.1 protein	1.96034	Os03g0405000	4333071		NAD(P)-binding domain containing protein
LOC_Os03g29180	LOC_Os03g29180.1 protein	1.64399	Os03g0405100	4333072		Ubiquinone biosynthesis protein COQ9 domain containing protein
LOC_Os03g29190	LOC_Os03g29190.2 protein	2.53086	Os03g0405500	4333075		Similar to PDI-like protein
LOC_Os03g29240	LOC_Os03g29240.1 protein	2.76145	Os03g0405900	4333077		Hypothetical conserved gene
LOC_Os03g29260	LOC_Os03g29260.2 protein	2.5017	Os03g0406200	4333079	eEF-1beta2	Elongation factor 1 beta 2
LOC_Os03g29260	LOC_Os03g29260.2 protein	2.5017	Os03g0406250		#N/A	#N/A
LOC_Os03g29460	LOC_Os03g29460.1 protein	1.98116	Os03g0408300	4333083		Similar to 60S ribosomal protein L27a-3
LOC_Os03g29570	LOC_Os03g29570.1 protein	1.60072	Os03g0409400			Similar to mps one binder kinase activator-like 1A
LOC_Os03g29750	LOC_Os03g29750.1 protein	2.89646	Os03g0411000	4333093		Apoptosis inhibitory 5 family protein
LOC_Os03g29770	LOC_Os03g29770.1 protein	1.69018	Os03g0411300			EF-Hand type domain containing protein
LOC_Os03g29910	LOC_Os03g29910.1 protein	1.76106	Os03g0412200	4333100		Conserved hypothetical protein
LOC_Os03g30000	LOC_Os03g30000.1 protein	1.6256	Os03g0413400	4333107		Glycosyl transferase, family 8 protein
LOC_Os03g30430	LOC_Os03g30430.1 protein	2.97125	Os03g0417800	9269934		Similar to Nap16kDa protein
LOC_Os03g30460	LOC_Os03g30460.1 protein	1.57491	Os03g0417900	4333120		Similar to ARE1-like protein
LOC_Os03g30550	LOC_Os03g30550.1 protein	2.31397	Os03g0418800			RNA recognition motif domain domain containing protein
LOC_Os03g31134	LOC_Os03g31134.1 protein	2.59778	Os03g0424800	4333150		Similar to 40S ribosomal protein S19-3
LOC_Os03g31210	LOC_Os03g31210.1 protein	1.54103	Os03g0425600	4333156		UDP-glucose dehydrogenase
LOC_Os03g31550	LOC_Os03g31550.1 protein	1.85403	Os03g0429800	4333171		Similar to Xanthine dehydrogenase 1 (EC 1.1.1.204)
LOC_Os03g31570	LOC_Os03g31570.1 protein	2.27158	Os03g0430000	4333173		Twin arginine translocation signal, Tat domain containing protein
LOC_Os03g31594	LOC_Os03g31594.1 protein	1.50786	Os03g0430100		#N/A	#N/A
LOC_Os03g31594	LOC_Os03g31594.1 protein	1.50786	Os03g0430400		#N/A	#N/A
LOC_Os03g32040	LOC_Os03g32040.1 protein	1.67234	Os03g0434400	4333184		Similar to Phenazine biosynthesis-like protein, expressed
LOC_Os03g32170	LOC_Os03g32170.1 protein	1.55351	Os03g0436400	107275612		Similar to A.thaliana gene induced upon wounding stress
LOC_Os03g32330	LOC_Os03g32330.1 protein	3.40093	Os03g0438400			Hypothetical protein
LOC_Os03g32470	LOC_Os03g32470.1 protein	1.77071	Os03g0439500	4333208		2OG-Fe(II) oxygenase domain containing protein
LOC_Os03g32490	LOC_Os03g32490.1 protein	0.629215	Os03g0439700	4333209		Protein of unknown function DUF1230 family protein
LOC_Os03g32590	LOC_Os03g32590.1 protein	1.67837	Os03g0441000	4333214		Similar to Transcription initiation factor TFIID component TAF4 family protein, expressed
LOC_Os03g32630	LOC_Os03g32630.1 protein	2.05176	Os03g0441500	4333216	OsABCF2	ABC transporter-like domain containing protein
LOC_Os03g33580	LOC_Os03g33580.1 protein	2.19329	Os03g0448600	4333230	OsWD4-76	WD40 repeat-like domain containing protein
LOC_Os03g33590	LOC_Os03g33590.1 protein	1.59267	Os03g0448700	4333231		Interferon-related developmental regulator domain containing protein
LOC_Os03g34300	LOC_Os03g34300.1 protein	1.55837	Os03g0454100	4333235		TMS membrane protein/tumour differentially expressed protein family protein
LOC_Os03g36750	LOC_Os03g36750.1 protein	0.387748	Os03g0565200	4333266		Haloacid dehalogenase-like hydrolase domain containing protein
LOC_Os03g36780	LOC_Os03g36780.1 protein	1.87647	Os03g0565500	4333268	mEF-G	Similar to Elongation factor G 1, mitochondrial precursor (mEF-G-1) (EFGM)
LOC_Os03g36910	LOC_Os03g36910.1 protein	2.41919	Os03g0566600	4333272		Methyltransferase FkbM domain containing protein
LOC_Os03g37270	LOC_Os03g37270.1 protein	2.00845	Os03g0569900	4333283		Similar to RNA Binding Protein 45
LOC_Os03g37330	LOC_Os03g37330.1 protein	1.56362	Os03g0570300			Zinc finger, C2H2-like domain containing protein
LOC_Os03g37810	LOC_Os03g37810.1 protein	1.83541	Os03g0574600	4333295		Conserved hypothetical protein
LOC_Os03g37970	LOC_Os03g37970.1 protein	2.07723	Os03g0576700	4333306	RPL13b	Similar to 60S ribosomal protein L13 (BBC1 protein homolog)
LOC_Os03g37984	LOC_Os03g37984.1 protein	1.52095	Os03g0576900	4333307	OsPUT3	Amino acid/polyamine transporter I family protein
LOC_Os03g38000	LOC_Os03g38000.1 protein	2.19652	Os03g0577000	4333308		Similar to Ribosomal protein S3 (Fragment)
LOC_Os03g38260	LOC_Os03g38260.1 protein	1.95534	Os03g0579300	4333317		60S ribosomal protein L19
LOC_Os03g38490	LOC_Os03g38490.1 protein	2.465	Os03g0581600	4333327		Similar to DAG protein
LOC_Os03g38740	LOC_Os03g38740.1 protein	1.50496	Os03g0583900	4333337	OsDCL2a	DEAD-like helicase, N-terminal domain containing protein
LOC_Os03g38950	LOC_Os03g38950.1 protein	0.440247	Os03g0586500	4333342		Similar to chloroplast post-illumination chlorophyll fluorescence increase protein
LOC_Os03g38970	LOC_Os03g38970.1 protein	1.5147	Os03g0586700	4333344		Conserved hypothetical protein
LOC_Os03g38980	LOC_Os03g38980.1 protein	2.13538	Os03g0586800	4333345		Similar to Lysyl-tRNA synthetase (EC 6.1.1.6) (Lysine--tRNA ligase) (LysRS)
LOC_Os03g38990	LOC_Os03g38990.1 protein	1.57011	Os03g0586900	4333346	RBP-59	DNA helicase, putative domain containing protein
LOC_Os03g39129	LOC_Os03g39129.1 protein	1.89932	Os03g0588200	4333350		Frigida-like family protein
LOC_Os03g39610	LOC_Os03g39610.1 protein	0.276863	Os03g0592500	4333359	LHCB	Similar to Photosystem II type II chlorophyll a/b binding protein (Fragment)
LOC_Os03g39760	LOC_Os03g39760.1 protein	0.510717	Os03g0594900	4333368		Cytochrome P450 family protein
LOC_Os03g39820	LOC_Os03g39820.1 protein	1.94641	Os03g0595200			Similar to predicted protein
LOC_Os03g39830	LOC_Os03g39830.1 protein	0.470988	Os03g0595300	4333370		Conserved hypothetical protein
LOC_Os03g40070	LOC_Os03g40070.1 protein	1.51242	Os03g0597600	4333381	OsASNase1	Similar to L-asparaginase (EC 3.5.1.1) (L-asparagine amidohydrolase)
LOC_Os03g40110	LOC_Os03g40110.1 protein	2.74618	Os03g0598200			Nop14-like protein family protein
LOC_Os03g40180	LOC_Os03g40180.1 protein	2.45737	Os03g0598800	4333387	OsRPL15	Similar to Ribosomal protein L15
LOC_Os03g40270	LOC_Os03g40270.1 protein	1.99398	Os03g0599800	4333393	OsUAM1	Reversibly glycosylated polypeptide
LOC_Os03g40310	LOC_Os03g40310.1 protein	1.8968	Os03g0600400			Conserved hypothetical protein
LOC_Os03g40670	LOC_Os03g40670.1 protein	1.51304	Os03g0603600	4333407		PLC-like phosphodiesterase, TIM beta/alpha-barrel domain domain containing protein
LOC_Os03g41419	LOC_Os03g41419.1 protein	1.62104	Os03g0610650	9270857	OsSRP-LRS	Similar to cDNA clone:002-125-A07, full insert sequence
LOC_Os03g41419	LOC_Os03g41612.1 protein	1.6737	Os03g0610700		#N/A	#N/A
LOC_Os03g41612	LOC_Os03g42110.1 protein	1.82088	Os03g0612600			Similar to Ribosomal 5S rRNA E-loop binding protein Ctc/L25/TL5 containing protein, expressed
LOC_Os03g42110	LOC_Os03g42220.1 protein	2.19587	Os03g0617900	4333458		Semialdehyde dehydrogenase, dimerisation region domain containing protein
LOC_Os03g42220	LOC_Os03g42220.2 protein	2.05582	Os03g0619400	4333462		Chaperone, tailless complex polypeptide 1 domain containing protein
LOC_Os03g42320	LOC_Os03g42320.1 protein	1.71543	Os03g0620800	4333468		Similar to SEC1-family transport protein SLY1 (AtSLY1)
LOC_Os03g42750	LOC_Os03g42750.1 protein	1.89151	Os03g0625700	4333493	OsSEC3A	Subunit of the exocyst complex, Defense respons
LOC_Os03g42770	LOC_Os03g42770.1 protein	2.83711	Os03g0625900	4333495	OsWD4-78	WD40 repeat-like domain containing protein
LOC_Os03g42840	LOC_Os03g42840.1 protein	1.73662	Os03g0626800	4333502	OsCBL3	Calcineurin B protein
LOC_Os03g42900	LOC_Os03g42900.1 protein	1.73208	Os03g0627500	4333505		Similar to KH domain containing protein, expressed
LOC_Os03g43020	LOC_Os03g43020.1 protein	1.56097	Os03g0628900	4333507		Prefoldin domain containing protein
LOC_Os03g43430	LOC_Os03g43430.1 protein	0.60503	Os03g0634000			Similar to THA4
LOC_Os03g43850	LOC_Os03g43850.1 protein	1.61818	Os03g0639700		RecA	Similar to protein recA
LOC_Os03g44150	LOC_Os03g44150.1 protein	1.6656	Os03g0643300	4333554	OsOAT	Ornithine delta-aminotransferase, Abiotic stress toleranc
LOC_Os03g44200	LOC_Os03g44200.2 protein	1.53046	Os03g0644000	4333557	ATG6B	ATG6/Beclin-1 protein, Abiotic stresses (heat,cold and drought) and hormone (abscisic acid) respons
LOC_Os03g44310	LOC_Os03g44310.1 protein	1.65514	Os03g0645200			Similar to Translation initiation factor eIF-2B delta subunit (eIF-2B GDP-GTP exchange factor)
LOC_Os03g44420	LOC_Os03g44420.1 protein	1.5443	Os03g0646100	4333567	FtsZ2-1	Similar to Plastid division protein ftsZ1 precursor
LOC_Os03g44484	LOC_Os03g44484.1 protein	1.57056	Os03g0646800			Similar to DNA-directed RNA polymerase
LOC_Os03g44500	LOC_Os03g44500.1 protein	1.67384	Os03g0646900	107277011	OsPPKL1	Protein phosphatase with Kelch-like repeat domain, Serine/threonine phosphatase (EC:3.1.3.16), Regulation of grain length and yiel
LOC_Os03g44520	LOC_Os03g44520.1 protein	1.8688	Os03g0647400	4333573		GCK domain containing protein
LOC_Os03g44530	LOC_Os03g44530.1 protein	2.60063	Os03g0647500			Similar to GTP binding protein
LOC_Os03g44560	LOC_Os03g44560.1 protein	1.95163	Os03g0647800	4333576		Similar to expp1 protein
LOC_Os03g44620	LOC_Os03g44620.2 protein	2.57375	Os03g0648400	4333580	OsDjA4	Similar to DnaJ protein
LOC_Os03g44780	LOC_Os03g44780.1 protein	2.24962	Os03g0650700	4333588		Translation elongation factor EFG/EF2, C-terminal domain containing protein
LOC_Os03g44830	LOC_Os03g44830.1 protein	3.27655	Os03g0651100		OsRhmbd9	Peptidase S54, rhomboid domain containing protein
LOC_Os03g45170	LOC_Os03g45170.1 protein	1.51702	Os03g0654400		OsCAT4	Similar to Cationic amino acid transporter-like protein
LOC_Os03g45180	LOC_Os03g45180.1 protein	1.60044	Os03g0654500			Domain of unknown function DUF2215 domain containing protein
LOC_Os03g45280	LOC_Os03g45280.1 protein	2.49803	Os03g0655400	4333610	OsLEA24	Similar to LIP5
LOC_Os03g45340	LOC_Os03g45340.1 protein	1.65171	Os03g0656100			Similar to Hsp20/alpha crystallin family protein, expressed
LOC_Os03g45400	LOC_Os03g45400.1 protein	2.43411	Os03g0656900	4333618	NUS1	Plastid RNA-binding protein, Regulation of chloroplast RNA metabolism, Early chloroplast development under cold stres
LOC_Os03g45760	LOC_Os03g45760.1 protein	1.851	Os03g0659800			Similar to H0525G02.7 protein
LOC_Os03g45920	LOC_Os03g45920.1 protein	1.94871	Os03g0661300	4333632	TUB8	Beta-tubulin , Microtubules formatio
LOC_Os03g46310	LOC_Os03g46310.1 protein	1.6425	Os03g0665800	4333659		Armadillo-type fold domain containing protein
LOC_Os03g46340	LOC_Os03g46340.1 protein	1.53228	Os03g0666200	4333661	OsSWAP7A	Rac/Rop guanine nucleotide exchange factor, Regulation of immune response
LOC_Os03g46390	LOC_Os03g46390.1 protein	1.92548	Os03g0666500	4333662	OsRab5B1	Similar to Ras-related protein RHA1
LOC_Os03g46480	LOC_Os03g46480.1 protein	1.64118	Os03g0667700	9266519		Similar to RanBP1 domain containing protein, expressed
LOC_Os03g46490	LOC_Os03g46490.1 protein	2.28043	Os03g0667800	4333672	RPS21	Ribosomal protein S21e family protein
LOC_Os03g46600	LOC_Os03g46600.1 protein	1.69393	Os03g0668900	4333677		Similar to acidic leucine-rich nuclear phosphoprotein 32 family member A
LOC_Os03g46610	LOC_Os03g46610.1 protein	2.94217	Os03g0669000	4333678	TOGR1	DEAD-box RNA helicase, Regulation of thermotolerant growth, rRNA homeostasis at high temperatur
LOC_Os03g46660	LOC_Os03g46660.1 protein	1.62705	Os03g0669300			Beta-1,3-glucanase-like protein
LOC_Os03g46710	LOC_Os03g46710.1 protein	1.71613	Os03g0669800			Zinc finger, FYVE-type domain containing protein
LOC_Os03g46750	LOC_Os03g46750.1 protein	1.89406	Os03g0670200	4333686		Similar to YJR013Wp (Fragment)
LOC_Os03g46770	LOC_Os03g46770.1 protein	1.97704	Os03g0670700	4333690	OsGRP3	Similar to Glycine-rich RNA-binding, abscisic acid-inducible protein
LOC_Os03g47010	LOC_Os03g47010.1 protein	2.03459	Os03g0672900	4333697		Glycoside hydrolase, family 10 domain containing protein
LOC_Os03g47120	LOC_Os03g47120.1 protein	1.70971	Os03g0674300		OsCBSDUF2	Similar to PGPS/D5 (Fragment)
LOC_Os03g47270	LOC_Os03g47270.1 protein	1.97485	Os03g0676300	4333711		Similar to cold shock protein-1
LOC_Os03g47790	LOC_Os03g47790.1 protein	1.52268	Os03g0681750			Hypothetical gene
LOC_Os03g47790	LOC_Os03g47790.1 protein	1.52268	Os03g0681800		#N/A	#N/A
LOC_Os03g47800	LOC_Os03g47800.1 protein	1.86793	Os03g0681900	4333731	OsRZ3	Similar to RGP-3 (Fragment)
LOC_Os03g47930	LOC_Os03g47930.1 protein	1.60643	Os03g0683700			Conserved hypothetical protein
LOC_Os03g47940	LOC_Os03g47940.1 protein	1.74426	Os03g0683800	4333736	OsGELP53	Similar to Proline-rich protein APG-like
LOC_Os03g47980	LOC_Os03g47980.1 protein	1.6402	Os03g0684100	4333739		Armadillo-like helical domain containing protein
LOC_Os03g48000	LOC_Os03g48000.1 protein	0.645618	Os03g0684400	4333741	OsMRS2-6	Mg2+ transporter protein, CorA-like domain containing protein
LOC_Os03g48090	LOC_Os03g48090.1 protein	1.89559	Os03g0685600	4333750	OsWD4-82	WD40 repeat-like domain containing protein
LOC_Os03g48110	LOC_Os03g48110.1 protein	1.51047	Os03g0685900	4333753		Similar to F1N21.17
LOC_Os03g48170	LOC_Os03g48170.1 protein	1.52919	Os03g0686900	4333759	FLO6	CBM48 domain-containing protein, Compound granule formation and starch synthesi
LOC_Os03g48180	LOC_Os03g48180.1 protein	1.56163	Os03g0687000	9269916	OsNPF2.4	Similar to predicted protein
LOC_Os03g48260	LOC_Os03g48260.1 protein	1.51065	Os03g0688200	4333766		Conserved hypothetical protein
LOC_Os03g48300	LOC_Os03g48300.1 protein	1.53876	Os03g0689100	4333768		Histidine acid phosphatase family protein
LOC_Os03g48380	LOC_Os03g48380.1 protein	1.56529	Os03g0689900	4333772		Similar to predicted protein
LOC_Os03g48430	LOC_Os03g48430.1 protein	1.54541	Os03g0690500			Similar to Oxidoreductase, 2OG-Fe oxygenase family protein, expressed
LOC_Os03g48626	LOC_Os03g48626.1 protein	1.66954	Os03g0692700	9272634		Similar to Pherophorin-S precursor
LOC_Os03g48780	LOC_Os03g48780.1 protein	2.99594	Os03g0694000	4333794	Osoxo4	Similar to Oxalate oxidase 1 (EC 1.2.3.4) (Germin)
LOC_Os03g48850	LOC_Os03g48850.1 protein	2.05802	Os03g0694900	4333799	OsValRS1	Similar to Valyl-tRNA synthetase (EC 6.1.1.9) (Valine--tRNA ligase) (ValRS)
LOC_Os03g48930	LOC_Os03g48930.1 protein	1.6604	Os03g0695600	4333803	OsPBD1	Proteasome subunit beta type 2 (EC 3.4.25.1) (20S proteasome alpha subunit D) (20S proteasome subunit beta-4)
LOC_Os03g49150	LOC_Os03g49150.1 protein	2.03014	Os03g0698500	4333809		Similar to protein yippee-like
LOC_Os03g49170	LOC_Os03g49170.1 protein	1.54498	Os03g0698800	4333810	OsC3H24	Ankyrin domain containing protein
LOC_Os03g49210	LOC_Os03g49210.1 protein	2.78359	Os03g0699200	4333814		BRCT domain containing protein
LOC_Os03g49230	LOC_Os03g49230.1 protein	2.63559	Os03g0699400	4333816		Silencing group B protein
LOC_Os03g49250	LOC_Os03g49250.1 protein	1.77087	Os03g0699600	4333817	OsFbox168	Cyclin-like F-box domain containing protein
LOC_Os03g49380	LOC_Os03g49380.1 protein	1.50296	Os03g0700700	4333823	OsLOX1	Similar to Lipoxygenase (Fragment)
LOC_Os03g49420	LOC_Os03g49420.1 protein	1.54381	Os03g0701000			Similar to HEAT repeat family protein, expressed
LOC_Os03g49485	LOC_Os03g49485.1 protein	2.99197	Os03g0701550			Non-protein coding transcript
LOC_Os03g49570	LOC_Os03g49570.1 protein	2.18487	Os03g0702700			Protein of unknown function DUF250 domain containing protein
LOC_Os03g49580	LOC_Os03g49580.1 protein	1.6656	Os03g0702800	4333840		Similar to Eukaryotic peptide chain release factor subunit 1 (eRF1) (Eukaryotic release factor 1) (TB3-1) (Cl1 protein)
LOC_Os03g49600	LOC_Os03g49600.1 protein	1.56431	Os03g0703000	4333841	Os3bglu7	Similar to Beta-glucosidase
LOC_Os03g49610	LOC_Os03g49610.1 protein	1.99849	Os03g0703100	4333842	Os3bglu8	Similar to Beta-glucosidase
LOC_Os03g49720	LOC_Os03g49720.1 protein	0.436609	Os03g0704100			Similar to structural molecule
LOC_Os03g49900	LOC_Os03g49900.1 protein	1.68389	Os03g0706900	4333857	OsRHC1	Zinc finger, RING-type domain containing protein
LOC_Os03g49940	LOC_Os03g49940.1 protein	0.484158	Os03g0707200			Similar to Integral membrane protein DUF6 containing protein, expressed
LOC_Os03g49940	LOC_Os03g49940.1 protein	0.484158	Os03g0707250		#N/A	#N/A
LOC_Os03g50040	LOC_Os03g50040.1 protein	1.95281	Os03g0708100		OMT7	Phytanoyl-CoA dioxygenase family protein
LOC_Os03g50090	LOC_Os03g50090.2 protein	1.5964	Os03g0708600	4333866	OsRH21	DEAD-like helicase, N-terminal domain containing protein
LOC_Os03g50120	LOC_Os03g50120.1 protein	2.17172	Os03g0708900	4333869		Zinc finger, RanBP2-type domain containing protein
LOC_Os03g50130	LOC_Os03g50130.1 protein	1.61884	Os03g0709000	4333870		Membrane-associated, eicosanoid and glutathione metabolism (MAPEG) domain containing protein
LOC_Os03g50140	LOC_Os03g50140.1 protein	2.39976	Os03g0709100	4333871	OsUCL8	Uclacyanin (UCL), Phytocyanin family protein, Regulation of photosynthesis and grain yiel
LOC_Os03g50290	LOC_Os03g50290.1 protein	1.73231	Os03g0710800	4333880	GF14F	14-3-3-like protein S94
LOC_Os03g50300	LOC_Os03g50300.1 protein	1.64514	Os03g0710900	4333881		Similar to CCAAT displacement protein-related / CDP-related
LOC_Os03g50325	LOC_Os03g50325.1 protein	2.01399	None		#N/A	#N/A
LOC_Os03g50340	LOC_Os03g50340.1 protein	1.72118	Os03g0711400	4333885	OsWD4-84	Similar to Coatomer alpha subunit
LOC_Os03g50350	LOC_Os03g50350.1 protein	1.75257	Os03g0711500		OsWD4-85	Similar to cDNA clone:J023075G08, full insert sequence
LOC_Os03g50380	LOC_Os03g50380.1 protein	2.64718	Os03g0711700	4333888		Similar to Transcription factor S-II family protein, expressed
LOC_Os03g50450	LOC_Os03g50450.1 protein	1.69769	Os03g0712400			Similar to atypical receptor-like kinase MARK
LOC_Os03g50490	LOC_Os03g50490.1 protein	1.99076	Os03g0712800	4333896	OsGS1	Cytosolic glutamine synthetas
LOC_Os03g50510	LOC_Os03g50510.1 protein	1.54008	Os03g0713000	4333898		Similar to Chloroplast threonine deaminase 1
LOC_Os03g50520	LOC_Os03g50520.1 protein	1.84318	Os03g0713100	4333899		Similar to dynamin-related protein 1C
LOC_Os03g50540	LOC_Os03g50540.1 protein	1.59786	Os03g0713400	4333901		Similar to NADH-ubiquinone oxidoreductase 75 kDa subunit, mitochondrial precursor (EC 1.6.5.3) (EC 1.6.99.3) (Complex I-75KD) (CI-75KD) (76 kDa mitochondrial complex I subunit)
LOC_Os03g50730	LOC_Os03g50730.1 protein	1.77522	Os03g0715332			Hypothetical conserved gene
LOC_Os03g50730	LOC_Os03g50730.1 protein	1.77522	Os03g0715400		#N/A	#N/A
LOC_Os03g50810	LOC_Os03g50810.1 protein	1.88037	Os03g0717000		OsTMK	Similar to TMK protein precursor
LOC_Os03g50885	LOC_Os03g50885.1 protein	1.66222	Os03g0718100	4333919	ACT1	Actin 1
LOC_Os03g50940	LOC_Os03g50940.1 protein	1.70339	Os03g0718600	4333922		Cytochrome c oxidase assembly protein CtaG/Cox11 family protein
LOC_Os03g51080	LOC_Os03g51080.1 protein	1.64888	Os03g0720300	4333932	GDCi	Similar to Glutamate decarboxylase isozyme 1 (EC 4.1.1.15)
LOC_Os03g51140	LOC_Os03g51140.1 protein	1.89283	Os03g0721200			Armadillo-like helical domain containing protein
LOC_Os03g51150	LOC_Os03g51150.1 protein	1.64217	Os03g0721300	4333936		Protein of unknown function DUF946, plant family protein
LOC_Os03g51250	LOC_Os03g51250.1 protein	1.80323	Os03g0722600	4333945		Adenylate cyclase-associated CAP domain containing protein
LOC_Os03g51459	LOC_Os03g51459.1 protein	2.10063	Os03g0724500			Conserved hypothetical protein
LOC_Os03g51470	LOC_Os03g51470.1 protein	4.02597	Os03g0724600			Conserved hypothetical protein
LOC_Os03g51520	LOC_Os03g51520.2 protein	1.56564	Os03g0725050			Conserved hypothetical protein
LOC_Os03g51520	LOC_Os03g51520.2 protein	1.56564	Os03g0725100		#N/A	#N/A
LOC_Os03g51550	LOC_Os03g51550.3 protein	1.53796	Os03g0725400	4333964	OsWDR5a	Similar to WD-repeat protein 5 (BMP2-induced 3-kb gene protein) (WD-repeat protein BIG-3)
LOC_Os03g51600	LOC_Os03g51600.1 protein	2.25006	Os03g0726100	4333966	OsTubA3	Similar to Tubulin alpha-1 chain (Alpha-1 tubulin)
LOC_Os03g51650	LOC_Os03g51650.1 protein	2.57915	Os03g0726500	4333970		Protein of unknown function DUF81 domain containing protein
LOC_Os03g51700	LOC_Os03g51700.1 protein	1.79636	Os03g0727100	4333974		Conserved hypothetical protein
LOC_Os03g51870	LOC_Os03g51870.1 protein	1.82699	Os03g0728500	4333981		Forkhead-associated domain containing protein
LOC_Os03g51900	LOC_Os03g51900.1 protein	2.49202	Os03g0728800	4333983	OsRH16	Similar to RNA helicase (Fragment)
LOC_Os03g51920	LOC_Os03g51920.1 protein	0.297059	Os03g0729000	4333985		Similar to Peptidase, M50 family
LOC_Os03g51984	LOC_Os03g51984.1 protein	0.299754	Os03g0729700			Ribosomal RNA small subunit methyltransferase E domain containing protein
LOC_Os03g52120	LOC_Os03g52120.1 protein	1.52211	Os03g0731050			Similar to OSIGBa0138E08-OSIGBa0161L23.2 protein
LOC_Os03g52130	LOC_Os03g52130.1 protein	0.516873	Os03g0731100			Photosystem I reaction centre subunit N family protein
LOC_Os03g52320	LOC_Os03g52320.1 protein	1.65964	Os03g0733600	4334010	OsGIF3	SSXT family protein
LOC_Os03g52400	LOC_Os03g52400.1 protein	1.57419	Os03g0734400	4334016		Ribosomal protein L7/L12 family protein
LOC_Os03g52470	LOC_Os03g52470.1 protein	2.38673	Os03g0735100	4334021	OsWD4-87	Quinoprotein amine dehydrogenase, beta chain-like domain containing protein
LOC_Os03g52490	LOC_Os03g52490.1 protein	1.98663	Os03g0735300	4334023		Alba, DNA/RNA-binding protein family protein
LOC_Os03g52594	LOC_Os03g52594.4 protein	1.83465	Os03g0736000			Similar to NOT2/NOT3/NOT5 family protein, expressed
LOC_Os03g52630	LOC_Os03g52630.1 protein	1.7838	Os03g0736300	4334029	OsGH9A3	Similar to CEL6=CELLULASE 6 (Fragment)
LOC_Os03g52690	LOC_Os03g52690.1 protein	1.68945	Os03g0737000	4334035	OsCBSX4	Cystathionine beta-synthase, core domain containing protein
LOC_Os03g52700	LOC_Os03g52700.1 protein	1.54679	Os03g0737200	9270217	OsHOS1	E3-ubiquitin ligase, Modulation of the cold stress respons
LOC_Os03g52770	LOC_Os03g52770.1 protein	1.59549	Os03g0737800			Vps51/Vps67 domain containing protein
LOC_Os03g52780	LOC_Os03g52780.1 protein	1.6444	Os03g0737900	4334043		Similar to predicted protein
LOC_Os03g52830	LOC_Os03g52830.1 protein	1.90805	Os03g0738200			Hypothetical conserved gene
LOC_Os03g52840	LOC_Os03g52840.1 protein	0.585069	Os03g0738400	4334048	OsSHM1	Similar to Serine hydroxymethyltransferase, cytosolic (EC 2.1.2.1) (Serine methylase) (Glycine hydroxymethyltransferase) (SHMT)
LOC_Os03g52980	LOC_Os03g52980.1 protein	1.54226	Os03g0740700			Protein similar to CwfJ, C-terminal 2 domain containing protein
LOC_Os03g53270	LOC_Os03g53270.1 protein	1.74491	Os03g0744600	4334077		Similar to Ripening-associated protein (Fragment)
LOC_Os03g53280	LOC_Os03g53280.1 protein	1.60304	Os03g0744650			Similar to predicted protein
LOC_Os03g53280	LOC_Os03g53280.1 protein	1.60304	Os03g0744675		#N/A	#N/A
LOC_Os03g53310	LOC_Os03g53310.1 protein	1.80658	Os03g0744800	4334079		emp24/gp25L/p24 family protein
LOC_Os03g53530	LOC_Os03g53530.1 protein	1.6081	Os03g0746800	4334092	OsWD4-92	WD-40 repeat containing protein
LOC_Os03g53650	LOC_Os03g53650.3 protein	2.5312	Os03g0747800	4334101	RCS3	Cysteine synthase (EC 2.5.1.47
LOC_Os03g53670	LOC_Os03g53670.2 protein	2.04247	Os03g0748000	4334103		YT521-B-like protein family protein
LOC_Os03g53720	LOC_Os03g53720.1 protein	1.63137	Os03g0748400			Serine protein kinase-like protein
LOC_Os03g53750	LOC_Os03g53750.1 protein	2.01963	Os03g0748700	4334110	OsISC38	Iron hydrogenase domain containing protein
LOC_Os03g53760	LOC_Os03g53760.1 protein	1.83242	Os03g0748800	4334111		Similar to Helicase associated domain family protein, expressed
LOC_Os03g53800	LOC_Os03g53800.1 protein	1.51	Os03g0749300	4334114	OsBGLU1	Similar to Exoglucanase precursor
LOC_Os03g53890	LOC_Os03g53890.1 protein	2.00844	Os03g0749900	4334118		N-6 adenine-specific DNA methylase, conserved site domain containing protein
LOC_Os03g53910	LOC_Os03g53910.1 protein	1.88301	Os03g0750100			Similar to TPR Domain containing protein, expressed
LOC_Os03g53950	LOC_Os03g53950.1 protein	1.51523	Os03g0750700		OsSTRL3	Six-bladed beta-propeller, TolB-like domain containing protein
LOC_Os03g54000	LOC_Os03g54000.1 protein	1.55007	Os03g0751100	4334129	OPT	Iron-deficiency-regulated oligopeptide transporter, Iron homeostasi
LOC_Os03g54084	LOC_Os03g54084.1 protein	1.53939	Os03g0752100	4334135	PHYC	Phytochrome C, Control of deetiolation and flowering, Photoperception of continuous far-red ligh
LOC_Os03g54130	LOC_Os03g54130.1 protein	0.312869	Os03g0752500			Similar to Cysteine proteinase (Fragment)
LOC_Os03g54770	LOC_Os03g54770.1 protein	1.52525	Os03g0754900	4334149	OsWD4-93	Similar to Cleavage stimulation factor, 50 kDa subunit
LOC_Os03g54780	LOC_Os03g54780.1 protein	1.93246	Os03g0755000			Similar to Serine/threonine kinase (Fragment)
LOC_Os03g54890	LOC_Os03g54890.1 protein	2.23836	Os03g0756000	4334154		Similar to 60S ribosomal protein L13a-4
LOC_Os03g54910	LOC_Os03g54910.1 protein	2.20396	Os03g0756300	4334157		X8 domain containing protein
LOC_Os03g54980	LOC_Os03g54980.1 protein	1.51037	Os03g0756800	4334160		Uncharacterised protein family UPF0139 domain containing protein
LOC_Os03g55010	LOC_Os03g55010.1 protein	0.548559	Os03g0757000			UDP-glucuronosyl/UDP-glucosyltransferase domain containing protein
LOC_Os03g55050	LOC_Os03g55050.1 protein	4.49508	Os03g0757600	4334167		UDP-glucuronosyl/UDP-glucosyltransferase family protein
LOC_Os03g55070	LOC_Os03g55070.2 protein	1.90545	Os03g0757900	4334169		Similar to UDP-glucose 6-dehydrogenase (EC 1.1.1.22) (UDP-Glc dehydrogenase) (UDP-GlcDH) (UDPGDH)
LOC_Os03g55150	LOC_Os03g55150.1 protein	2.9278	Os03g0758800		eIF-5A-2	Similar to Eukaryotic translation initiation factor 5A-2 (eIF-5A-2) (eIF-4D)
LOC_Os03g55240	LOC_Os03g55240.1 protein	1.58409	Os03g0760100	9267058	OsCYP81A6	Hypothetical conserved gene
LOC_Os03g55240	LOC_Os03g55240.1 protein	1.58409	Os03g0760200		#N/A	#N/A
LOC_Os03g55270	LOC_Os03g55270.1 protein	2.22705	Os03g0760600	4334187		TIP41-like protein family protein
LOC_Os03g55290	LOC_Os03g55290.1 protein	3.20098	Os03g0760800	4334189	GASR1	A member of the GAST (gibberellin (GA)-Stimulated Transcript) family, Control of seedling growth and alpha-amylase expression, Cell proliferation in meristems and panicles developmen
LOC_Os03g55310	LOC_Os03g55310.1 protein	2.2453	Os03g0761000	4334190		SWIB/MDM2 domain containing protein
LOC_Os03g55330	LOC_Os03g55330.1 protein	1.53463	Os03g0761200			Ankyrin repeat containing protein
LOC_Os03g55350	LOC_Os03g55350.1 protein	2.38722	Os03g0761500	4334194	OsSub31	Similar to Subtilisin-like protease (Fragment)
LOC_Os03g55784	LOC_Os03g55784.1 protein	1.64652	Os03g0766900	4334232		Allene oxide synthase
LOC_Os03g55800	LOC_Os03g55800.1 protein	1.93131	Os03g0767000	4334233	AOS1	Allene oxide synthase (CYP74A1), Biosynthesis of jasmonic acid (JA
LOC_Os03g56280	LOC_Os03g56280.1 protein	0.609484	Os03g0773800	4334274		Similar to Malate dehydrogenase, glyoxysomal precursor (EC 1.1.1.37) (mbNAD-MDH)
LOC_Os03g56300	LOC_Os03g56300.1 protein	1.50522	Os03g0774200	4334276		Similar to NADH-ubiquinone oxidoreductase subunit 8 (EC 1.6.5.3)
LOC_Os03g56310	LOC_Os03g56310.1 protein	0.608106	Os03g0774300	4334277		HAD superfamily (subfamily IG) hydrolase, 5'-Nucleotidase protein
LOC_Os03g56390	LOC_Os03g56390.1 protein	1.79674	Os03g0775300			Flavodoxin/nitric oxide synthase domain containing protein
LOC_Os03g56610	LOC_Os03g56610.1 protein	2.18265	Os03g0777500	4334296		Protein of unknown function DUF1068 family protein
LOC_Os03g56630	LOC_Os03g56630.1 protein	1.96548	Os03g0777700			FAR1 DNA binding domain domain containing protein
LOC_Os03g56670	LOC_Os03g56670.2 protein	0.440135	Os03g0778100	4334300	OsPS1-F	Similar to Photosystem-1 F subunit
LOC_Os03g56790	LOC_Os03g56790.1 protein	1.66655	Os03g0780400	4334307	OsADF2	Actin depolymerizing factor, Actin-binding protein, Abiotic stress respons
LOC_Os03g56800	LOC_Os03g56800.1 protein	1.51002	Os03g0780500		OsCBSIMPDH1	Similar to inosine-5-monophosphate dehydrogenase 2
LOC_Os03g56810	LOC_Os03g56810.1 protein	1.5681	Os03g0780600	4334309	OsTUB7	Tubulin beta-1 chain (Beta-1 tubulin)
LOC_Os03g56830	LOC_Os03g56830.1 protein	2.97303	Os03g0780900			Protein of unknown function DUF858, methyltransferase-like family protein
LOC_Os03g57040	LOC_Os03g57040.1 protein	1.64846	Os03g0783700	4334331		Similar to AP-1 complex subunit sigma-2
LOC_Os03g57100	LOC_Os03g57100.1 protein	1.64304	Os03g0784400	4334335		Protein of unknown function DUF1692 domain containing protein
LOC_Os03g57120	LOC_Os03g57120.1 protein	1.78699	Os03g0784700	4334338	FNR	Ferredoxin--NADP reductase, root isozyme, chloroplast precursor (EC 1.18.1.2) (FNR)
LOC_Os03g57140	LOC_Os03g57140.1 protein	2.30159	Os03g0784900	4334340		Glycolipid transfer protein, GLTP domain containing protein
LOC_Os03g57149	LOC_Os03g57149.1 protein	1.50984	Os03g0785200	4334343		Mitochodrial transcription termination factor-related family protein
LOC_Os03g57280	LOC_Os03g57280.1 protein	2.16563	Os03g0786700	4334353		N2,N2-dimethylguanosine tRNA methyltransferase family protein
LOC_Os03g57290	LOC_Os03g57290.1 protein	1.91292	Os03g0786800			Similar to Cullin-4A (CUL-4A)
LOC_Os03g57300	LOC_Os03g57300.1 protein	1.5642	Os03g0786900			Tetratricopeptide-like helical domain containing protein
LOC_Os03g57320	LOC_Os03g57320.1 protein	1.55321	Os03g0787100			Similar to expp1 protein
LOC_Os03g57340	LOC_Os03g57340.1 protein	1.94123	Os03g0787300	4334359	OsDjA5	Similar to DnaJ homolog
LOC_Os03g57420	LOC_Os03g57420.1 protein	1.86599	Os03g0788200	4334363		MD-2-related lipid-recognition domain containing protein
LOC_Os03g57430	LOC_Os03g57430.1 protein	1.70242	Os03g0788300			Conserved hypothetical protein
LOC_Os03g58010	LOC_Os03g58010.1 protein	1.67981	Os03g0794200			Similar to N-acetyltransferase
LOC_Os03g58040	LOC_Os03g58040.1 protein	1.57991	Os03g0794500	4334405	OsGDH1	Similar to Glutamate dehydrogenase (EC 1.4.1.3) (GDH)
LOC_Os03g58110	LOC_Os03g58110.1 protein	1.5675	Os03g0795300	4334413		Similar to Extensin protein-like
LOC_Os03g58130	LOC_Os03g58130.1 protein	2.0714	Os03g0795500	4334415		Thioredoxin, core domain containing protein
LOC_Os03g58170	LOC_Os03g58170.1 protein	2.01381	Os03g0796000		SI2	Hypothetical conserved gene
LOC_Os03g58204	LOC_Os03g58204.1 protein	1.82956	Os03g0796501	9272589	OsRPL4	Similar to 60S ribosomal protein L4 (L1)
LOC_Os03g58240	LOC_Os03g58240.1 protein	1.75776	Os03g0796800			Similar to guanylate-binding family protein
LOC_Os03g58250	LOC_Os03g58250.1 protein	1.77993	Os03g0796900	4334424	REB	bZIP transcription factor, Globulin gene promoter in endosper
LOC_Os03g58340	LOC_Os03g58340.1 protein	2.71016	Os03g0797700	4334430		rRNA-processing protein EFG1 domain containing protein
LOC_Os03g58430	LOC_Os03g58430.1 protein	2.50963	Os03g0798600	4334438		Similar to 40S ribosomal protein S15 (Fragment)
LOC_Os03g58480	LOC_Os03g58480.1 protein	1.53515	Os03g0799100	4334440	BIP116	Similar to WAVE-DAMPENED2
LOC_Os03g58530	LOC_Os03g58530.1 protein	1.90127	Os03g0799600	4334444		Similar to ES43 like protein
LOC_Os03g58640	LOC_Os03g58640.1 protein	1.97222	Os03g0800800	4334454		Forkhead-associated domain containing protein
LOC_Os03g58710	LOC_Os03g58710.1 protein	1.55256	Os03g0801700	4334460		Rossmann-like alpha/beta/alpha sandwich fold domain containing protein
LOC_Os03g58720	LOC_Os03g58720.1 protein	3.02498	Os03g0801800	4334461		Nucleotide-binding, alpha-beta plait domain containing protein
LOC_Os03g58790	LOC_Os03g58790.1 protein	1.6594	Os03g0802500	4334467		ATPase, AAA-type, core domain containing protein
LOC_Os03g58810	LOC_Os03g58810.1 protein	2.61187	Os03g0802650			Hypothetical gene
LOC_Os03g58810	LOC_Os03g58810.1 protein	2.61187	Os03g0802700		#N/A	#N/A
LOC_Os03g58840	LOC_Os03g58840.1 protein	1.58952	Os03g0803000	4334472		Synaptobrevin domain containing protein
LOC_Os03g58930	LOC_Os03g58930.1 protein	1.50576	Os03g0804100	4334483		Conserved hypothetical protein
LOC_Os03g58940	LOC_Os03g58940.1 protein	2.60542	Os03g0804200	4334484	OsLTPG1	Bifunctional inhibitor/plant lipid transfer protein/seed storage domain containing protein
LOC_Os03g59020	LOC_Os03g59020.1 protein	2.16111	Os03g0804800	4334490		Similar to Cct8-prov protein
LOC_Os03g59050	LOC_Os03g59050.1 protein	1.886	Os03g0805200	4334493	OsRH37	Similar to RNA helicase (Fragment)
LOC_Os03g59080	LOC_Os03g59080.1 protein	2.15185	Os03g0805500			Similar to AAE18 (ACYL-ACTIVATING ENZYME 18); catalytic/ ligase
LOC_Os03g59160	LOC_Os03g59160.1 protein	1.51022	Os03g0806400			Similar to Elongation factor P family protein, expressed
LOC_Os03g59220	LOC_Os03g59220.1 protein	1.91197	Os03g0806900	4334506		Similar to Cytochrome-C reductase 14 kDa subunit (EC 1.10.2.2) (Fragment)
LOC_Os03g59280	LOC_Os03g59280.1 protein	1.96506	Os03g0807500	9266866	OsSCL1	Cupredoxin domain containing protein
LOC_Os03g59300	LOC_Os03g59300.1 protein	2.81029	Os03g0807700	4334511		Protein of unknown function DUF642 domain containing protein
LOC_Os03g59310	LOC_Os03g59310.1 protein	2.04456	Os03g0807800	4334512	SUP44	Similar to 40S ribosomal protein S2 (Fragment)
LOC_Os03g59320	LOC_Os03g59320.1 protein	0.537741	Os03g0807900	4334513		Chaperonin-like RbcX family protein
LOC_Os03g59330	LOC_Os03g59330.1 protein	2.0672	Os03g0808000		OsPGL11	Glycoside hydrolase, family 28 domain containing protein
LOC_Os03g59330	LOC_Os03g59330.1 protein	2.0672	Os03g0808150		#N/A	#N/A
LOC_Os03g59610	LOC_Os03g59610.1 protein	1.94187	Os03g0810800	4334535	OsABA2	Short-chain alcohol dehydrogenase, ABA biosynthesis, Lesion mimic formation, Disease-resistance, Seed dormanc
LOC_Os03g59700	LOC_Os03g59700.1 protein	1.88756	Os03g0811600	4334542	OsCYP22	Similar to Peptidyl prolyl isomerase H
LOC_Os03g59710	LOC_Os03g59710.1 protein	1.98025	Os03g0811700	4334543		Similar to Pre-mRNA branch site protein p14 (SF3B 14 kDa subunit)
LOC_Os03g60080	LOC_Os03g60080.1 protein	1.59498	Os03g0815100	4334553	SNAC1	Similar to OsNAC6 protein
LOC_Os03g60090	LOC_Os03g60090.1 protein	1.66496	Os03g0815200	4334554		Similar to Methylenetetrahydrofolate reductase (EC 1.5.1.20)
LOC_Os03g60130	LOC_Os03g60130.2 protein	1.65624	Os03g0815900			Similar to DNA-directed RNA polymerase
LOC_Os03g60170	LOC_Os03g60170.1 protein	1.6	Os03g0816300			Conserved hypothetical protein
LOC_Os03g60180	LOC_Os03g60180.1 protein	1.89045	Os03g0816400	4334564		GTP-binding protein, HSR1-related domain containing protein
LOC_Os03g60360	LOC_Os03g60360.1 protein	1.64688	Os03g0818000			Similar to myosin-like protein
LOC_Os03g60370	LOC_Os03g60370.1 protein	1.99687	Os03g0818100	4334577		Histidine acid phosphatase family protein
LOC_Os03g60460	LOC_Os03g60460.1 protein	2.05543	Os03g0819100	4334583		Peptidase M1, membrane alanine aminopeptidase family protein
LOC_Os03g60480	LOC_Os03g60480.1 protein	1.99344	Os03g0819400	4334586		Heavy metal transport/detoxification protein domain containing protein
LOC_Os03g60509	LOC_Os03g60509.2 protein	1.93229	Os03g0819600	4334588	gh1	Chalcone isomerase (EC 5.5.1.6)
LOC_Os03g60530	LOC_Os03g60530.1 protein	1.80986	Os03g0819900	4334590	OsRab8A5	Similar to RAB8C
LOC_Os03g60550	LOC_Os03g60550.1 protein	1.66907	Os03g0820100	4334591		Similar to Auxin-resistance protein AXR1
LOC_Os03g60600	LOC_Os03g60600.1 protein	1.51635	Os03g0820700			Zinc finger, CCHC-type domain containing protein
LOC_Os03g60620	LOC_Os03g60620.1 protein	1.9639	Os03g0821100	4334598	OsHSP7	Similar to Non-cell-autonomous heat shock cognate protein 70
LOC_Os03g60700	LOC_Os03g60700.1 protein	1.90308	Os03g0821800	4334604		Glycosyl transferase, family 2 domain containing protein
LOC_Os03g60740	LOC_Os03g60740.1 protein	1.52375	Os03g0822200	4334608		NAD(P)-binding domain containing protein
LOC_Os03g60780	LOC_Os03g60780.1 protein	1.87442	Os03g0822700	4334611		Armadillo-like helical domain containing protein
LOC_Os03g60800	LOC_Os03g60800.1 protein	1.55986	Os03g0822900	4334613		Protein of unknown function DUF659 domain containing protein
LOC_Os03g60850	LOC_Os03g60850.1 protein	1.91477	Os03g0823500	4334618		TGF-beta receptor, type I/II extracellular region family protein
LOC_Os03g60870	LOC_Os03g60870.1 protein	1.90842	Os03g0823700	4334619	OsRab11B2	Similar to Ras-related protein Rab11C
LOC_Os03g61019	LOC_Os03g61019.1 protein	1.67013	Os03g0825400	4334631		Similar to Mitochondrial import inner membrane translocase subunit Tim10
LOC_Os03g61050	LOC_Os03g61050.1 protein	1.60325	Os03g0825700	4334634	Os	Ca<sup>2+</sup> binding protein, Regulation of tapetal cell degradation and pollen formatio
LOC_Os03g61090	LOC_Os03g61090.1 protein	0.399836	Os03g0826200			Conserved hypothetical protein
LOC_Os03g61110	LOC_Os03g61110.1 protein	1.84175	Os03g0826400	4334639	OsC3H25	Nucleotide-binding, alpha-beta plait domain containing protein
LOC_Os03g61120	LOC_Os03g61120.1 protein	1.55086	Os03g0826500	4334640	OASA1	Anthranilate synthase alpha 1 subunit
LOC_Os03g61130	LOC_Os03g61130.1 protein	1.67223	Os03g0826600	4334641	NPC1	Similar to Phospholipase (Fragment)
LOC_Os03g61140	LOC_Os03g61140.1 protein	3.19693	Os03g0826700			SAM (and some other nucleotide) binding motif domain containing protein
LOC_Os03g61200	LOC_Os03g61200.1 protein	1.55459	Os03g0827500	4334647	OsSPX4	SPX family protein, Phosphate starvation signalin
LOC_Os03g61210	LOC_Os03g61210.1 protein	1.75421	Os03g0827600	4334648		Similar to F10A16.24 protein
LOC_Os03g61330	LOC_Os03g61330.2 protein	1.62836	Os03g0829000	4334655		Fumarylacetoacetase, C-terminal-related domain containing protein
LOC_Os03g61340	LOC_Os03g61340.1 protein	1.69436	Os03g0829100	4334656		Similar to Soluble epoxide hydrolase
LOC_Os03g61560	LOC_Os03g61560.1 protein	3.11799	Os03g0831100	4334667		Armadillo-like helical domain containing protein
LOC_Os03g61630	LOC_Os03g61630.1 protein	1.93104	Os03g0831800	4334673	OsWD4-95	Similar to Sec13p
LOC_Os03g61640	LOC_Os03g61640.1 protein	1.81587	Os03g0831900	4334674		Zinc finger, U1-type domain containing protein
LOC_Os03g61670	LOC_Os03g61670.1 protein	1.76521	Os03g0832200	4334675	CRT	Similar to Calcium-binding protein precursor (Calreticulin)
LOC_Os03g61680	LOC_Os03g61680.1 protein	2.48208	Os03g0832300	4334676		Similar to huntingtin interacting protein K
LOC_Os03g61730	LOC_Os03g61730.1 protein	1.67324	Os03g0832900		OsDjC38	Similar to DNAJ-like protein (Fragment)
LOC_Os03g61750	LOC_Os03g61750.1 protein	3.14596	Os03g0833200		OsTRM13	tRNA nucleoside methyltransferase, Methyltransferase for the 2'-O-methyladenosine nucleoside modification, Regulation of salt stress tolerance, ABA hormone respons
LOC_Os03g61790	LOC_Os03g61790.1 protein	2.7405	Os03g0833700	4334688		RNA 3'-terminal phosphate cyclase family protein
LOC_Os03g61800	LOC_Os03g61800.2 protein	1.58207	Os03g0833800	4334689	OsPGL28	Pectin lyase fold/virulence factor domain containing protein
LOC_Os03g61930	LOC_Os03g61930.1 protein	1.58991	Os03g0835600		OsACBP6	Acyl-CoA-binding protein , Peroxisomal beta-oxidation, Lipid metabolism, Stress respons
LOC_Os03g61970	LOC_Os03g61970.1 protein	1.67156	Os03g0836000	4334702	RAC3	Similar to Actin 7 (Actin 2)
LOC_Os03g61990	LOC_Os03g61990.5 protein	1.63941	Os03g0836200	4334703	OsRZ1	Similar to RNA-binding protein RZ-1
LOC_Os03g62250	LOC_Os03g62250.1 protein	1.53702	Os03g0839000	4334720		Zinc finger, RING/FYVE/PHD-type domain containing protein
LOC_Os03g62250	LOC_Os03g62250.1 protein	1.53702	Os03g0839100		#N/A	#N/A
LOC_Os03g62420	LOC_Os03g62420.1 protein	1.82232	Os03g0840900	4334733		Protein of unknown function DUF543 family protein
LOC_Os03g62490	LOC_Os03g62490.1 protein	1.93372	Os03g0841700	4334737		Similar to Prohibitin
LOC_Os03g62600	LOC_Os03g62600.1 protein	1.65566	Os03g0843100	4334746	OsRab11A1	Ras GTPase family protein
LOC_Os03g62610	LOC_Os03g62610.1 protein	0.520355	Os03g0843200			Protein of unknown function DUF901 family protein
LOC_Os03g62620	LOC_Os03g62620.3 protein	2.02647	Os03g0843300	4334748	OsLEA7	Late embryogenesis abundant protein 2 family protein
LOC_Os03g62670	LOC_Os03g62670.1 protein	1.63053	Os03g0843800	4334753	OsHOL1	Methyl chloride transferase
LOC_Os03g62680	LOC_Os03g62680.1 protein	1.57574	Os03g0843900			Similar to Glycohydrolase family protein, expressed
LOC_Os03g62700	LOC_Os03g62700.1 protein	1.55174	Os03g0844100	4334756	OsRLCK123	Similar to Pti1 kinase-like protein
LOC_Os03g62720	LOC_Os03g62720.1 protein	1.73255	Os03g0844450	9269241		Similar to 3' exoribonuclease family domain 1-containing protein
LOC_Os03g62740	LOC_Os03g62740.1 protein	2.2698	Os03g0844600	4334758	OsGELP54	Esterase, SGNH hydrolase-type domain containing protein
LOC_Os03g62780	LOC_Os03g62780.1 protein	0.509621	Os03g0844900			Nucleic acid-binding, OB-fold-like domain containing protein
LOC_Os03g62870	LOC_Os03g62870.2 protein	2.07629	Os03g0845700	4334766		Similar to RPB17 (Fragment)
LOC_Os03g63090	LOC_Os03g63090.1 protein	1.76214	Os03g0848300	4334780		Similar to Actin-related protein 2/3 complex subunit 4 (ARP2/3 complex 20 kDa subunit) (p20-ARC)
LOC_Os03g63140	LOC_Os03g63140.1 protein	1.53401	Os03g0848600	4334782		Similar to NOI protein
LOC_Os03g63250	LOC_Os03g63250.1 protein	1.92266	Os03g0849600	4334786		COG complex component, COG2 family protein
LOC_Os03g63380	LOC_Os03g63380.1 protein	1.59148	Os03g0850800	4334797		Similar to transferase, transferring glycosyl groups
LOC_Os03g63390	LOC_Os03g63390.1 protein	1.86154	Os03g0850900		OsUCL12	Similar to Chemocyanin precursor (Basic blue protein) (Plantacyanin)
LOC_Os03g63400	LOC_Os03g63400.1 protein	2.72606	Os03g0851000	4334799	Osj3g2BTF3	Similar to Transcription factor homolog BTF3-like protein
[truncated: 2,980 more rows]
