# Supplementary material for: The Rice Aspartyl-tRNA Synthetase YLC3 Regulates Amino Acid Homeostasis and Chloroplast Development Under Low Temperature
Source: Front Plant Sci. 2022 Mar 4;13:847364. doi: 10.3389/fpls.2022.847364 (PMC9635353; doi:10.3389/fpls.2022.847364)
Supplement: Supplementary Table 2 — 4,979 proteins from KEGG analysis. [file Table_2.XLSX]

## Sheet: Rice_Mut_to_WT_proteins_limma-9
Accession	Description	Ratio	adjust_p_value
1073625615	ribosomal protein S12 (chloroplast) [Oryza sativa]	1.11613	0.0552152
1073625616	PsbA (chloroplast) [Oryza sativa]	0.572937	5.52034e-07
1073625621	PsbD (chloroplast) [Oryza sativa]	0.499197	3.34493e-07
1073625622	PsbC (chloroplast) [Oryza sativa]	0.37663	8.03732e-08
1073625626	RpoB (chloroplast) [Oryza sativa]	1.33029	5.79047e-05
1073625627	RpoC1 (chloroplast) [Oryza sativa]	1.26147	0.000221815
1073625628	RpoC2 (chloroplast) [Oryza sativa]	1.22896	0.000434104
1073625629	ribosomal protein S2 (chloroplast) [Oryza sativa]	0.86212	0.00382579
1073625630	AtpI (chloroplast) [Oryza sativa]	0.392894	1.38789e-07
1073625631	AtpH (chloroplast) [Oryza sativa]	0.38341	4.24989e-06
1073625632	AtpF (chloroplast) [Oryza sativa]	0.451652	2.60702e-07
1073625633	AtpA (chloroplast) [Oryza sativa]	0.522094	3.75979e-07
1073625634	ribosomal protein S14 (chloroplast) [Oryza sativa]	0.788881	8.14438e-05
1073625635	PsaB (chloroplast) [Oryza sativa]	0.498881	1.75599e-07
1073625636	PsaA (chloroplast) [Oryza sativa]	0.398867	1.7003e-07
1073625637	Ycf3 (chloroplast) [Oryza sativa]	0.821847	0.000500051
1073625638	ribosomal protein S4 (chloroplast) [Oryza sativa]	0.863694	0.00204872
1073625639	NdhJ (chloroplast) [Oryza sativa]	0.626378	5.5405e-06
1073625640	NdhK (chloroplast) [Oryza sativa]	0.678453	4.16356e-06
1073625642	AtpE (chloroplast) [Oryza sativa]	0.47857	1.40616e-07
1073625643	AtpB (chloroplast) [Oryza sativa]	0.471248	1.31811e-07
1073625644	ribulose-1,5-bisphosphate carboxylase/oxygenase large subunit (chloroplast) [Oryza sativa]	0.414772	6.39288e-08
1073625647	Ycf4 (chloroplast) [Oryza sativa]	1.18211	0.013968
1073625649	PetA (chloroplast) [Oryza sativa]	0.514927	2.02013e-07
1073625651	PsbL (chloroplast) [Oryza sativa]	0.62411	3.92335e-06
1073625653	PsbE (chloroplast) [Oryza sativa]	0.444928	2.09324e-07
1073625657	ribosomal protein L33 (chloroplast) [Oryza sativa]	1.21399	0.000470406
1073625658	ribosomal protein S18 (chloroplast) [Oryza sativa]	0.682005	1.97502e-05
1073625659	ribosomal protein L20 (chloroplast) [Oryza sativa]	0.629409	8.95038e-06
1073625660	ClpP (chloroplast) [Oryza sativa]	1.50955	2.30452e-05
1073625661	PsbB (chloroplast) [Oryza sativa]	0.3335	3.17839e-08
1073625664	PsbH (chloroplast) [Oryza sativa]	0.282236	9.97035e-08
1073625666	PetD (chloroplast) [Oryza sativa]	0.245836	1.90721e-07
1073625667	RpoA (chloroplast) [Oryza sativa]	1.29385	7.29516e-05
1073625668	ribosomal protein S11 (chloroplast) [Oryza sativa]	0.90144	0.0875336
1073625669	ribosomal protein L36 (chloroplast) [Oryza sativa]	0.726767	0.000263634
1073625670	InfA (chloroplast) [Oryza sativa]	1.24661	0.000223932
1073625671	ribosomal protein S8 (chloroplast) [Oryza sativa]	0.810144	0.000538269
1073625672	ribosomal protein L14 (chloroplast) [Oryza sativa]	0.93937	0.0944325
1073625674	ribosomal protein S3 (chloroplast) [Oryza sativa]	0.796477	0.000208819
1073625675	ribosomal protein L22 (chloroplast) [Oryza sativa]	0.652804	4.05341e-06
1073625684	NdhB (chloroplast) [Oryza sativa]	0.727278	0.000156797
1073625691	NdhF (chloroplast) [Oryza sativa]	0.681263	6.35834e-06
1073625692	ribosomal protein L32 (chloroplast) [Oryza sativa]	0.989752	0.848329
1073625695	PsaC (chloroplast) [Oryza sativa]	0.349475	1.99057e-07
1073625698	NdhI (chloroplast) [Oryza sativa]	0.728571	1.61712e-05
1073625699	NdhA (chloroplast) [Oryza sativa]	0.591042	5.89861e-07
1073625700	NdhH (chloroplast) [Oryza sativa]	0.740248	2.92333e-05
1073625712	ribosomal protein L23 (chloroplast) [Oryza sativa]	0.862845	0.00302069
1073625713	ribosomal protein L2 (chloroplast) [Oryza sativa]	0.874841	0.00314691
1073625714	ribosomal protein S19 (chloroplast) [Oryza sativa]	1.0795	0.0470375
23495386	orf288 (mitochondrion) [Oryza sativa Japonica Group]	1.8383	3.47273e-05
23495388	Ribosomal protein S3 (mitochondrion) [Oryza sativa Japonica Group]	1.55417	6.23948e-06
23495395	Cytochrome c oxidase subunit 2 (mitochondrion) [Oryza sativa Japonica Group]	1.6557	1.15973e-06
23495405	Ribosomal protein L2 (mitochondrion) [Oryza sativa Japonica Group]	1.57583	7.97385e-06
23495413	Cytochrome c biogenesis Fc (mitochondrion) [Oryza sativa Japonica Group]	1.22707	0.345605
28564488	NADH dehydrogenase subunit 2 (mitochondrion) [Oryza sativa Japonica Group]	1.38095	1.03288e-05
60498735	hypothetical protein (mitochondrion) [Oryza sativa Japonica Group]	1.82457	1.7814e-06
60498737	Ribosomal protein S7 (mitochondrion) [Oryza sativa Japonica Group]	1.44303	0.000303631
60498738	ORFB protein (mitochondrion) [Oryza sativa Japonica Group]	1.53933	1.7551e-06
60498743	NADH dehydrogenase subunit 3 (mitochondrion) [Oryza sativa Japonica Group]	1.40943	6.17037e-05
60498744	Ribosomal protein S2 (mitochondrion) [Oryza sativa Japonica Group]	0.737817	0.000226628
60498746	Ribosomal protein S13 (mitochondrion) [Oryza sativa Japonica Group]	1.80385	2.5401e-06
60498748	Apocytochrome b (mitochondrion) [Oryza sativa Japonica Group]	2.02734	9.71602e-07
60498752	ATP synthase F0 subunit 1 (mitochondrion) [Oryza sativa Japonica Group]	1.60892	9.22932e-07
60498753	NADH dehydrogenase subunit 9 (mitochondrion) [Oryza sativa Japonica Group]	1.33595	1.45916e-05
61097813	NADH dehydrogenase subunit 5 (mitochondrion) [Oryza sativa Japonica Group]	1.51594	3.08189e-06
89145408	NADH dehydrogenase subunit 1 (mitochondrion) [Oryza sativa Japonica Group]	0.8069	0.00237198
92700092	Ribosomal protein S4 (mitochondrion) [Oryza sativa Japonica Group]	1.82566	3.15617e-06
ChrSy.fgenesh.mRNA.37 protein	expressed protein	1.14803	0.0176854
ChrSy.fgenesh.mRNA.47 protein	expressed protein	2.14383	1.09e-06
ChrSy.fgenesh.mRNA.49 protein	expressed protein	1.73876	2.27e-06
ChrSy.fgenesh.mRNA.69 protein	expressed protein	1.22645	0.000557868
ChrSy.fgenesh.mRNA.86 protein	expressed protein	0.944364	0.128519
ChrUn.fgenesh.mRNA.76 protein	expressed protein	1.14885	0.00377484
ChrUn.fgenesh.mRNA.86 protein	expressed protein	2.23615	1.92e-07
ChrUn.fgenesh.mRNA.96 protein	expressed protein	0.964389	0.348925
LOC_Os01g01050.1 protein	R3H domain containing protein, expressed	1.39361	0.000765131
LOC_Os01g01080.1 protein	decarboxylase, putative, expressed	1.47925	1.27e-05
LOC_Os01g01120.1 protein	enolase-phosphatase E1, putative, expressed	0.534205	3.4e-07
LOC_Os01g01130.1 protein	snurportin-1, putative, expressed	1.51293	3.13e-06
LOC_Os01g01150.1 protein	RNA recognition motif, putative, expressed	1.21339	0.000274914
LOC_Os01g01280.1 protein	expressed protein	0.924784	0.185094
LOC_Os01g01302.1 protein	shikimate kinase, putative, expressed	0.804262	0.000278359
LOC_Os01g01307.1 protein	translocon-associated protein beta domain containing protein, expressed	1.78084	9.76e-07
LOC_Os01g01312.1 protein	retrotransposon protein, putative, Ty1-copia subclass, expressed	1.32604	0.0331913
LOC_Os01g01340.1 protein	light-induced protein 1-like, putative, expressed	0.32508	5.35e-07
LOC_Os01g01420.2 protein	expressed protein	1.53395	6.9e-06
LOC_Os01g01450.1 protein	stress responsive protein, putative, expressed	2.09046	2.61e-07
LOC_Os01g01510.1 protein	sas10/Utp3 family protein, expressed	3.18084	4.16e-08
LOC_Os01g01640.1 protein	Rer1 protein, putative, expressed	1.83861	9.98e-06
LOC_Os01g01650.1 protein	isoflavone reductase homolog IRL, putative, expressed	1.36521	0.00011604
LOC_Os01g01660.1 protein	isoflavone reductase, putative, expressed	0.885028	0.0102304
LOC_Os01g01670.2 protein	expressed protein	3.75207	4.93e-08
LOC_Os01g01710.1 protein	1-deoxy-D-xylulose 5-phosphate reductoisomerase, chloroplast precursor, putative, expressed	0.918584	0.0233575
LOC_Os01g01720.1 protein	pex14, putative, expressed	1.30071	3.96e-05
LOC_Os01g01790.1 protein	expressed protein	0.929705	0.0657012
LOC_Os01g01800.1 protein	expressed protein	1.33455	1.99e-05
LOC_Os01g01830.1 protein	OsPOP1 - Putative Prolyl Oligopeptidase homologue, expressed	1.5515	3.66e-06
LOC_Os01g01920.1 protein	HD domain containing protein 2, putative, expressed	1.44607	0.00252571
LOC_Os01g01960.1 protein	transcriptional repressor, putative, expressed	1.20873	0.000571833
LOC_Os01g02020.1 protein	acetyl-CoA acetyltransferase, cytosolic, putative, expressed	2.28664	7.04e-08
LOC_Os01g02080.1 protein	peptidyl-prolyl cis-trans isomerase, putative, expressed	0.664313	2.36e-06
LOC_Os01g02090.1 protein	expressed protein	1.6577	3.3e-06
LOC_Os01g02100.1 protein	transposon protein, putative, unclassified, expressed	1.16848	0.0101964
LOC_Os01g02170.1 protein	expressed protein	2.28332	1.3e-07
LOC_Os01g02180.2 protein	expressed protein	1.44873	4.17e-06
LOC_Os01g02720.2 protein	elongation factor Tu, putative, expressed	1.47492	5.49e-06
LOC_Os01g02870.1 protein	auxin-induced protein 5NG4, putative, expressed	1.22552	0.00282772
LOC_Os01g02880.1 protein	fructose-bisphospate aldolase isozyme, putative, expressed	2.6974	1.26e-07
LOC_Os01g02884.1 protein	ATP-dependent RNA helicase DHX36, putative, expressed	1.32964	0.000123
LOC_Os01g02900.1 protein	glycosyltransferase, putative, expressed	1.25835	0.000507695
LOC_Os01g02920.1 protein	glycosyltransferase protein, putative, expressed	1.41293	1.76e-05
LOC_Os01g02940.3 protein	glycosyltransferase protein, putative, expressed	1.56433	4.37e-05
LOC_Os01g02960.1 protein	expressed protein	1.36502	0.0065448
LOC_Os01g03020.1 protein	tRNA synthetase class I, putative, expressed	0.937791	0.123085
LOC_Os01g03040.1 protein	expressed protein	0.853156	0.00129924
LOC_Os01g03070.1 protein	transposon protein, putative, unclassified, expressed	1.51511	3.42e-06
LOC_Os01g03090.1 protein	methyltransferase, putative, expressed	1.7538	1.91e-06
LOC_Os01g03144.1 protein	white-brown complex homolog protein 7, putative, expressed	1.31949	0.000184027
LOC_Os01g03310.1 protein	BBTI1 - Bowman-Birk type bran trypsin inhibitor precursor, expressed	0.104023	1.19e-07
LOC_Os01g03320.1 protein	BBTI2 - Bowman-Birk type bran trypsin inhibitor precursor, expressed	0.233241	3.7e-08
LOC_Os01g03330.1 protein	BBTI3 - Bowman-Birk type bran trypsin inhibitor precursor, expressed	0.412988	9.74e-06
LOC_Os01g03340.1 protein	BBTI4 - Bowman-Birk type bran trypsin inhibitor precursor, expressed	1.11962	0.253934
LOC_Os01g03360.1 protein	BBTI5 - Bowman-Birk type bran trypsin inhibitor precursor, expressed	2.24092	1.87e-06
LOC_Os01g03390.1 protein	BBTI7 - Bowman-Birk type bran trypsin inhibitor precursor, expressed	2.26733	2.56e-07
LOC_Os01g03510.1 protein	WD domain, G-beta repeat domain containing protein, expressed	1.7854	1.99e-06
LOC_Os01g03520.1 protein	ubiquitin conjugating enzyme protein, putative, expressed	1.36311	6.82e-05
LOC_Os01g03549.1 protein	multi-copper oxidase type I family protein, putative, expressed	1.36657	4.57e-05
LOC_Os01g03650.1 protein	sufB/sufD domain containing protein, putative, expressed	1.12096	0.0201367
LOC_Os01g03660.2 protein	MYB family transcription factor, putative, expressed	2.15701	7.25e-07
LOC_Os01g03680.1 protein	BBTI8 - Bowman-Birk type bran trypsin inhibitor precursor, expressed	0.93922	0.322637
LOC_Os01g03730.1 protein	nuclease PA3, putative, expressed	1.13629	0.00663168
LOC_Os01g03760.1 protein	expressed protein	1.71879	4.18e-06
LOC_Os01g03820.1 protein	C2 domain containing protein, putative, expressed	1.14568	0.021712
LOC_Os01g03914.1 protein	cation efflux family protein, putative, expressed	1.80095	5.12e-06
LOC_Os01g03950.1 protein	glycosyl hydrolase, family 31, putative, expressed	1.77938	3.39e-06
LOC_Os01g04050.1 protein	BBTI12 - Bowman-Birk type bran trypsin inhibitor precursor, expressed	0.772903	0.00302202
LOC_Os01g04130.1 protein	peptidyl-tRNA hydrolase, mitochondrial precursor protein, putative, expressed	1.09712	0.0783797
LOC_Os01g04190.2 protein	transporter family protein, putative, expressed	1.83239	4.34e-07
LOC_Os01g04200.1 protein	metallo-beta-lactamase family protein, putative, expressed	1.52044	2.47e-06
LOC_Os01g04300.1 protein	glycosyl hydrolase family 10 protein, putative, expressed	1.61904	3.77e-06
LOC_Os01g04330.1 protein	OsCML16 - Calmodulin-related calcium sensor protein, expressed	1.55375	7.88e-06
LOC_Os01g04350.1 protein	hsp20/alpha crystallin family protein, putative, expressed	1.17859	0.00344466
LOC_Os01g04630.1 protein	muconate cycloisomerase, putative, expressed	0.899189	0.00969825
LOC_Os01g04640.1 protein	reticulon domain containing protein, putative, expressed	1.35094	0.00233706
LOC_Os01g04650.1 protein	PB1 domain containing protein, expressed	1.58848	7.97e-06
LOC_Os01g04710.1 protein	aspartic proteinase, putative, expressed	1.80796	3.34e-07
LOC_Os01g04720.1 protein	leucine-rich repeat protein-related, putative, expressed	1.87247	5.87e-07
LOC_Os01g04730.1 protein	ribosomal protein L24, putative, expressed	1.84183	2.28e-06
LOC_Os01g04814.1 protein	vacuolar protein sorting-associating protein 4B, putative, expressed	1.66124	6.6e-07
LOC_Os01g04900.1 protein	peptidase M50 family protein, putative, expressed	0.757046	0.000357723
LOC_Os01g04910.1 protein	TP53RK-binding protein, putative, expressed	1.92634	1.49e-07
LOC_Os01g04950.3 protein	peptide transporter PTR2, putative, expressed	0.981126	0.725689
LOC_Os01g05010.1 protein	mitochondrial glycoprotein, putative, expressed	2.70922	4.95e-08
LOC_Os01g05060.1 protein	mitochondrial glycoprotein, putative, expressed	1.25777	0.000207591
LOC_Os01g05070.1 protein	expressed protein	2.24401	3.11e-07
LOC_Os01g05080.1 protein	thylakoid lumenal protein, putative, expressed	0.668323	7.96e-06
LOC_Os01g05130.1 protein	expressed protein	2.7449	5.04e-07
LOC_Os01g05140.1 protein	expressed protein	1.74218	4.57e-06
LOC_Os01g05420.1 protein	IWS1 C-terminus family protein, putative, expressed	1.55589	3.13e-06
LOC_Os01g05470.1 protein	transcription factor X1, putative, expressed	1.86509	1.52e-06
LOC_Os01g05490.1 protein	triosephosphate isomerase, cytosolic, putative, expressed	1.31579	3.81e-05
LOC_Os01g05500.1 protein	zinc finger protein, putative, expressed	1.87443	1.83e-06
LOC_Os01g05540.1 protein	expressed protein	2.47359	9.83e-08
LOC_Os01g05560.1 protein	expressed protein	2.47811	2.26e-07
LOC_Os01g05610.1 protein	Core histone H2A/H2B/H3/H4 domain containing protein, putative, expressed	1.5421	3.21e-05
LOC_Os01g05650.1 protein	metallothionein, putative, expressed	2.21286	1.96e-05
LOC_Os01g05670.1 protein	3-oxo-5-alpha-steroid 4-dehydrogenase, putative, expressed	1.55105	5.72e-06
LOC_Os01g05790.1 protein	SLT1 protein, putative, expressed	1.19812	0.00148323
LOC_Os01g05800.1 protein	inner membrane protein, putative, expressed	0.872685	0.00311059
LOC_Os01g05810.1 protein	gamma-glutamyltranspeptidase 1 precursor, putative, expressed	1.30572	0.000237299
LOC_Os01g05840.1 protein	oxidoreductase, short chain dehydrogenase/reductase family domain containing family, expressed	0.708539	2.36e-05
LOC_Os01g05970.1 protein	OsFBO1 - F-box and other domain containing protein, expressed	1.54379	0.000558031
LOC_Os01g06020.1 protein	aspartyl-tRNA synthetase, putative, expressed	0.821339	0.000691902
LOC_Os01g06270.1 protein	expressed protein	1.30679	4.71e-05
LOC_Os01g06290.2 protein	splicing factor, arginine/serine-rich, putative, expressed	1.44019	8.95e-06
LOC_Os01g06470.1 protein	expressed protein	1.65677	8.99e-06
LOC_Os01g06490.1 protein	OsSCP1 - Putative Serine Carboxypeptidase homologue, expressed	1.32343	1.77e-05
LOC_Os01g06500.1 protein	PHLOEM 2-LIKE A5, putative, expressed	1.46465	3.15e-05
LOC_Os01g06550.1 protein	NF-X1-type zinc finger protein, putative, expressed	1.82746	0.000103821
LOC_Os01g06600.1 protein	glutaryl-CoA dehydrogenase, mitochondrial precursor, putative, expressed	1.78952	6.6e-07
LOC_Os01g06660.1 protein	thiamine pyrophosphate enzyme, C-terminal TPP binding domain containing protein, expressed	1.95125	2.14e-06
LOC_Os01g06740.1 protein	ribosome inactivating protein, putative, expressed	1.37216	0.000457965
LOC_Os01g07070.4 protein	transposon protein, putative, CACTA, En/Spm sub-class, expressed	1.66404	4.13e-06
LOC_Os01g07080.1 protein	DEAD-box ATP-dependent RNA helicase, putative, expressed	5.06464	3.37e-08
LOC_Os01g07090.1 protein	5-azacytidine resistance protein azr1, putative, expressed	0.635775	1.81e-06
LOC_Os01g07100.1 protein	expressed protein	1.63861	7.35e-07
LOC_Os01g07200.1 protein	staphylococcal nuclease homologue, putative, expressed	1.52752	2.99e-06
LOC_Os01g07250.1 protein	saposin-like type B, region 1 family protein, putative, expressed	1.10527	0.0691026
LOC_Os01g07300.2 protein	uncharacterized 50.6 kDa protein in the 5region of gyrA and gyrB, putative, expressed	1.72454	8.48e-06
LOC_Os01g07310.1 protein	transporter-related, putative, expressed	1.34651	3.28e-05
LOC_Os01g07340.1 protein	pentatricopeptide, putative, expressed	1.51218	3.51e-05
LOC_Os01g07370.2 protein	KIP1, putative, expressed	1.39611	2.36e-05
LOC_Os01g07382.1 protein	expressed protein	1.60312	5.49e-06
LOC_Os01g07390.1 protein	zinc finger, C3HC4 type family protein, expressed	2.16753	7.5e-07
LOC_Os01g07400.2 protein	WD40-like domain containing protein, putative, expressed	1.40391	3.26e-05
LOC_Os01g07490.1 protein	RST1, putative, expressed	1.3351	0.00106849
LOC_Os01g07520.1 protein	proline-rich family protein, putative, expressed	1.69859	2.87e-06
LOC_Os01g07530.1 protein	uncharacterized glycosyltransferase, putative, expressed	1.32689	0.000257057
LOC_Os01g07740.1 protein	DEAD-box ATP-dependent RNA helicase 14, putative, expressed	2.32941	1.04e-06
LOC_Os01g07760.2 protein	phospholipase D, putative, expressed	1.48555	7.98e-06
LOC_Os01g07770.1 protein	peroxidase precursor, putative, expressed	1.27735	0.000289054
LOC_Os01g07780.1 protein	embryo-specific 3, putative, expressed	2.35458	4.33e-07
LOC_Os01g07800.2 protein	thiol-disulphide oxidoreductase DCC, putative, expressed	0.588581	1.55e-06
LOC_Os01g07810.1 protein	protein of unknown function domain containing protein, expressed	1.96444	4.19e-07
LOC_Os01g07870.1 protein	ABC transporter family protein, putative, expressed	1.66359	1.53e-06
LOC_Os01g07880.1 protein	transcription factor HY5, putative, expressed	2.97146	3.98e-07
LOC_Os01g07910.1 protein	NADH-cytochrome b5 reductase, putative, expressed	1.73342	5.44e-07
LOC_Os01g07950.1 protein	#NAME?	1.71505	4.86e-06
LOC_Os01g07960.3 protein	acyl-protein thioesterase, putative, expressed	1.93276	2.19e-07
LOC_Os01g08110.1 protein	flavonol-3-O-glycoside-7-O-glucosyltransferase 1, putative, expressed	1.92424	2.18e-06
LOC_Os01g08200.1 protein	ubiquitin carboxyl-terminal hydrolase 14, putative, expressed	1.66462	1.1e-06
LOC_Os01g08270.1 protein	aminotransferase, classes I and II, domain containing protein, expressed	1.29278	0.000120786
LOC_Os01g08280.1 protein	expressed protein	1.83949	4.28e-07
LOC_Os01g08350.1 protein	ATP synthase subunit alpha, mitochondrial, putative, expressed	1.67435	7.25e-07
LOC_Os01g08400.1 protein	syntaxin, putative, expressed	1.78145	4.09e-06
LOC_Os01g08410.1 protein	early fruit mRNA, putative, expressed	2.61146	1.42e-07
LOC_Os01g08420.1 protein	EMB2410, putative, expressed	1.0873	0.0375936
LOC_Os01g08430.1 protein	expressed protein	1.33804	0.000531845
LOC_Os01g08440.1 protein	UDP-glucoronosyl and UDP-glucosyl transferase domain containing protein, expressed	1.34016	7.32e-05
LOC_Os01g08450.1 protein	ras-related protein, putative, expressed	2.03546	1.41e-07
LOC_Os01g08510.1 protein	MAR-binding filament-like protein 1, putative, expressed	0.823566	0.000738802
LOC_Os01g08560.2 protein	DnaK family protein, putative, expressed	1.74817	5.66e-07
LOC_Os01g08580.1 protein	frigida, putative, expressed	1.26575	0.00155259
LOC_Os01g08750.2 protein	expressed protein	1.50035	2.47e-05
LOC_Os01g08760.1 protein	choline/ethanolamine kinase, putative, expressed	1.87107	1.11e-06
LOC_Os01g08770.1 protein	WD domain, G-beta repeat domain containing protein, expressed	2.37122	7.98e-08
LOC_Os01g08820.1 protein	PHD-finger domain containing protein, putative, expressed	0.933009	0.0782185
LOC_Os01g08860.1 protein	hsp20/alpha crystallin family protein, putative, expressed	1.87808	8.32e-07
LOC_Os01g08930.1 protein	DEAD-box ATP-dependent RNA helicase, putative, expressed	1.73788	1.16e-05
LOC_Os01g08960.1 protein	phosducin-like protein 3, putative, expressed	1.29331	0.000119501
LOC_Os01g08970.1 protein	SSRP1-like FACT complex subunit, putative, expressed	1.41942	1.85e-05
LOC_Os01g09000.1 protein	glutaminyl-tRNA synthetase, putative, expressed	2.82509	5.73e-08
LOC_Os01g09010.1 protein	transferase family protein, putative, expressed	1.93275	4.4e-07
LOC_Os01g09120.1 protein	Twin LOV 1, putative, expressed	1.45755	8.8e-05
LOC_Os01g09200.1 protein	#NAME?	1.86692	8.9e-07
LOC_Os01g09246.1 protein	glycine-rich protein, putative, expressed	1.17098	0.00302306
LOC_Os01g09300.1 protein	oxidoreductase, putative, expressed	1.35132	1.76e-05
LOC_Os01g09300.3 protein	oxidoreductase, putative, expressed	1.33604	0.000105609
LOC_Os01g09320.1 protein	NADP-dependent malic enzyme, chloroplast precursor, putative, expressed	1.49723	1.7e-05
LOC_Os01g09420.1 protein	expressed protein	1.27011	7.08e-05
LOC_Os01g09430.1 protein	expressed protein	1.32862	1.84e-05
LOC_Os01g09510.4 protein	60S acidic ribosomal protein, putative, expressed	2.54905	2.28e-07
LOC_Os01g09540.1 protein	HAD superfamily phosphatase, putative, expressed	0.861526	0.00301637
LOC_Os01g09560.1 protein	mitochondrial-processing peptidase subunit alpha, mitochondrial precursor, putative, expressed	1.79437	2.81e-07
LOC_Os01g09570.1 protein	6-phosphofructokinase, putative, expressed	1.45574	7.57e-06
LOC_Os01g09750.1 protein	RNA methyltransferase protein, putative, expressed	1.41958	1.48e-05
LOC_Os01g09880.1 protein	harpin-induced protein 1 domain containing protein, expressed	1.50919	5.11e-06
LOC_Os01g09890.1 protein	translation initiation factor SUI1, putative, expressed	1.94569	2.03e-07
LOC_Os01g10010.2 protein	prenylated rab acceptor, putative, expressed	1.1193	0.141312
LOC_Os01g10020.1 protein	ectonucleotide pyrophosphatase/phosphodiesterase family member 1, putative, expressed	1.65915	5.63e-07
LOC_Os01g10050.1 protein	DEAD-box ATP-dependent RNA helicase, putative, expressed	1.49801	5.9e-06
LOC_Os01g10150.1 protein	- CK1 includes the casein kinase 1 kinases, expressed	1.60927	4.15e-05
LOC_Os01g10210.1 protein	lachrymatory factor synthase, putative, expressed	0.986336	0.756276
LOC_Os01g10280.1 protein	phosphoribosylaminoimidazole carboxylase, chloroplast precursor, putative, expressed	1.34597	1.74e-05
LOC_Os01g10290.2 protein	autophagy-related protein 3, putative, expressed	2.48584	1.3e-07
LOC_Os01g10350.1 protein	MPPN domain containing protein, expressed	1.76317	7.56e-07
LOC_Os01g10400.2 protein	expressed protein	1.14599	0.081705
LOC_Os01g10430.1 protein	protein kinase family protein, putative, expressed	1.3661	0.000121168
LOC_Os01g10690.1 protein	POLD3 - Putative DNA polymerase delta complex subunit, expressed	1.53551	0.000405236
LOC_Os01g10800.1 protein	pentatricopeptide, putative, expressed	1.07138	0.144014
LOC_Os01g10810.1 protein	rho termination factor, N-terminal domain containing protein, expressed	0.754489	0.00391139
LOC_Os01g10820.1 protein	ribosomal protein L5, putative, expressed	2.39333	6.37e-08
LOC_Os01g10830.1 protein	carnitine racemase like protein, putative, expressed	1.45103	5.09e-06
LOC_Os01g10850.1 protein	peroxidase precursor, putative, expressed	1.19358	0.000809865
LOC_Os01g10880.1 protein	expressed protein	0.884111	0.0160758
LOC_Os01g10930.1 protein	peptide-N4-asparagine amidase A, putative, expressed	1.87838	1.38e-06
LOC_Os01g10950.1 protein	peptide-N4-asparagine amidase A, putative, expressed	1.59686	1.89e-05
LOC_Os01g10960.1 protein	peptide-N4-asparagine amidase A, putative, expressed	1.12077	0.0466272
LOC_Os01g11010.1 protein	peptide-N4-asparagine amidase A, putative, expressed	1.26093	0.000402835
LOC_Os01g11054.1 protein	phosphoenolpyruvate carboxylase, putative, expressed	0.47703	8.29e-07
LOC_Os01g11070.1 protein	Alg9-like mannosyltransferase protein, putative, expressed	1.41276	3.76e-05
LOC_Os01g11110.2 protein	14-3-3 protein, putative, expressed	1.09762	0.0366686
LOC_Os01g11120.1 protein	CID11, putative, expressed	2.89608	1.02e-07
LOC_Os01g11160.1 protein	amino acid permease family protein, putative, expressed	0.674962	1.92e-05
LOC_Os01g11230.1 protein	SOUL heme-binding protein, putative, expressed	1.62321	3.64e-06
LOC_Os01g11240.1 protein	DUF538 domain containing protein, putative, expressed	2.73687	9.75e-08
LOC_Os01g11370.1 protein	ATP-dependent RNA helicase, putative, expressed	1.50726	2.05e-05
LOC_Os01g11414.1 protein	sodium/calcium exchanger protein, putative, expressed	1.36201	3.71e-05
LOC_Os01g11550.1 protein	TCP family transcription factor, putative, expressed	2.68547	3.26e-07
LOC_Os01g11570.1 protein	GDSL-like lipase/acylhydrolase, putative, expressed	1.66559	5.63e-07
LOC_Os01g11620.1 protein	GDSL-like lipase/acylhydrolase, putative, expressed	2.04592	2.73e-07
LOC_Os01g11730.1 protein	GDSL-like lipase/acylhydrolase, putative, expressed	1.30998	0.00310364
LOC_Os01g11810.1 protein	powdery mildew resistant protein 5, putative, expressed	2.16804	2.83e-05
LOC_Os01g11880.1 protein	DJ-1 family protein, putative, expressed	1.63157	2.67e-06
LOC_Os01g11900.1 protein	hhH-GPD superfamily base excision DNA repair protein, expressed	1.53774	7.66e-05
LOC_Os01g11920.1 protein	retrotransposon protein, putative, unclassified, expressed	1.68511	1.8e-06
LOC_Os01g11946.1 protein	ABC transporter, ATP-binding protein, putative, expressed	0.700014	6.43e-05
LOC_Os01g11970.1 protein	expressed protein	2.65035	6.64e-08
LOC_Os01g12080.1 protein	plant-specific domain TIGR01589 family protein, putative, expressed	1.30314	0.000971385
LOC_Os01g12090.1 protein	ribosomal protein S6 family protein, putative, expressed	1.0429	0.456897
LOC_Os01g12200.1 protein	expressed protein	1.3126	0.00013659
LOC_Os01g12230.1 protein	peptidase C45, acyl-coenzyme A/6-aminopenicillanic acid acyl-transferase, putative, expressed	1.48433	2.52e-06
LOC_Os01g12260.1 protein	vacuolar ATP synthase subunit E, putative, expressed	1.73142	2.18e-05
LOC_Os01g12270.1 protein	expressed protein	1.33182	0.00184812
LOC_Os01g12280.1 protein	hAT dimerisation domain-containing protein, putative, expressed	1.51417	0.00430325
LOC_Os01g12320.1 protein	GDSL-like lipase/acylhydrolase, putative, expressed	1.59673	1.15e-05
LOC_Os01g12390.1 protein	inactive receptor kinase At2g26730 precursor, putative, expressed	1.15904	0.0271134
LOC_Os01g12464.1 protein	CHCH domain containing protein, expressed	1.45072	7.66e-05
LOC_Os01g12480.1 protein	expressed protein	1.41984	4.94e-06
LOC_Os01g12560.1 protein	3-methyl-2-oxobutanoate hydroxymethyltransferase, putative, expressed	1.42536	4.99e-06
LOC_Os01g12650.1 protein	reticulon domain containing protein, putative, expressed	1.78452	1.44e-06
LOC_Os01g12670.1 protein	expressed protein	1.58169	4.25e-06
LOC_Os01g12710.1 protein	oxidoreductase, short chain dehydrogenase/reductase family domain containing protein, expressed	1.38521	1.73e-05
LOC_Os01g12720.1 protein	protein kinase domain containing protein, expressed	1.18341	0.00637173
LOC_Os01g12730.1 protein	ras-related protein, putative, expressed	1.27862	0.000430638
LOC_Os01g12740.1 protein	cytochrome P450, putative, expressed	1.28896	0.000306244
LOC_Os01g12810.2 protein	retrotransposon protein, putative, unclassified, expressed	1.12393	0.0106586
LOC_Os01g12830.1 protein	erythronate-4-phosphate dehydrogenase domain containing protein, expressed	1.00165	0.96182
LOC_Os01g12830.2 protein	erythronate-4-phosphate dehydrogenase domain containing protein, expressed	1.24177	0.000194198
LOC_Os01g12870.1 protein	eukaryotic translation initiation factor 3 subunit E-interacting protein, putative, expressed	1.44088	1.93e-05
LOC_Os01g12880.1 protein	VHS and GAT domain containing protein, expressed	1.34374	7.72e-05
LOC_Os01g12910.1 protein	thioesterase family protein, putative, expressed	1.21666	0.000364927
LOC_Os01g12920.1 protein	thioesterase family protein, putative, expressed	1.05985	0.209102
LOC_Os01g13030.2 protein	OsIAA3 - Auxin-responsive Aux/IAA gene family member, expressed	1.51765	2.41e-05
LOC_Os01g13080.1 protein	60S acidic ribosomal protein, putative, expressed	1.96131	1.86e-07
LOC_Os01g13090.1 protein	nucleic acid binding protein, putative, expressed	2.15875	2.52e-07
LOC_Os01g13100.1 protein	KH domain containing protein, putative, expressed	1.55667	1.62e-06
LOC_Os01g13150.1 protein	metallo-beta-lactamase family protein, putative, expressed	1.54779	2.75e-06
LOC_Os01g13160.1 protein	expressed protein	1.65319	9.37e-07
LOC_Os01g13190.1 protein	histidinol dehydrogenase, chloroplast precursor, putative, expressed	1.56936	9.9e-07
LOC_Os01g13200.1 protein	abscisic acid insensitive 8, putative, expressed	1.86866	2.72e-05
LOC_Os01g13210.1 protein	salt stress root protein RS1, putative, expressed	1.01659	0.861592
LOC_Os01g13250.1 protein	sarcoma antigen NY-SAR-91, putative, expressed	1.66852	1.13e-06
LOC_Os01g13390.1 protein	expressed protein	1.11303	0.0234147
LOC_Os01g13404.1 protein	ATP binding protein, putative, expressed	1.41164	5.17e-06
LOC_Os01g13420.1 protein	SOUL heme-binding protein, putative, expressed	0.968248	0.396193
LOC_Os01g13430.1 protein	importin-alpha re-exporter, putative, expressed	1.55333	3.56e-06
LOC_Os01g13460.1 protein	helix-loop-helix DNA-binding domain containing protein, expressed	1.55916	8.93e-05
LOC_Os01g13470.1 protein	KH domain containing protein, putative, expressed	1.65233	7.9e-07
LOC_Os01g13480.1 protein	glutaredoxin, putative, expressed	1.09936	0.0267789
LOC_Os01g13540.1 protein	NIN, putative, expressed	1.2386	0.0043362
LOC_Os01g13570.1 protein	phosphoglycerate mutase, putative, expressed	0.806261	0.000320389
LOC_Os01g13690.2 protein	ligA, putative, expressed	0.342584	6.85e-08
LOC_Os01g13700.1 protein	DNA-binding protein-related, putative, expressed	2.58136	5.41e-08
LOC_Os01g13730.1 protein	WD domain, G-beta repeat domain containing protein, expressed	1.92938	3.55e-07
LOC_Os01g13760.1 protein	dnaJ domain containing protein, expressed	2.07396	6.54e-07
LOC_Os01g13770.1 protein	DUF250 domain containing protein, putative, expressed	0.824486	0.00147159
LOC_Os01g14040.1 protein	D-tyrosyl-tRNA, putative, expressed	2.10824	2.1e-06
LOC_Os01g14050.1 protein	C2 domain containing protein, putative, expressed	1.33975	0.000517744
LOC_Os01g14110.1 protein	expressed protein	1.27565	0.0010674
LOC_Os01g14410.1 protein	early light-induced protein, chloroplast precursor, putative, expressed	5.42007	2.82e-08
LOC_Os01g14420.1 protein	RWP-RK domain-containing protein, putative, expressed	1.63293	3.53e-06
LOC_Os01g14550.1 protein	pathogen-related protein, putative, expressed	1.93572	1.34e-06
LOC_Os01g14580.1 protein	dehydrogenase, putative, expressed	1.33005	7.98e-05
LOC_Os01g14670.1 protein	Cupin domain containing protein, expressed	1.67979	7.86e-06
LOC_Os01g14690.4 protein	Lg106, putative, expressed	1.31975	0.000309427
LOC_Os01g14810.1 protein	5-nucleotidase domain-containing protein, putative, expressed	0.931844	0.0730862
LOC_Os01g14820.1 protein	expressed protein	1.174	0.00122738
LOC_Os01g14830.1 protein	ribosomal protein L3, putative, expressed	1.48797	2.99e-06
LOC_Os01g14840.1 protein	ZOS1-06 - C2H2 zinc finger protein, expressed	1.66704	2.87e-05
LOC_Os01g14860.1 protein	#NAME?	1.21144	0.000385996
LOC_Os01g14920.1 protein	zinc knuckle family protein, putative, expressed	2.3909	1.44e-07
LOC_Os01g14950.1 protein	importin subunit alpha, putative, expressed	2.24716	1.3e-07
LOC_Os01g15010.1 protein	miro, putative, expressed	1.48024	8.56e-06
LOC_Os01g15020.1 protein	lissencephaly type-1-like homology motif, putative, expressed	1.19023	0.00111494
LOC_Os01g15029.1 protein	expressed protein	1.00844	0.936382
LOC_Os01g15110.1 protein	syntaxin, putative, expressed	1.15736	0.0106351
LOC_Os01g15120.1 protein	hydrolase, alpha/beta fold family domain containing protein, expressed	1.34008	3.61e-05
LOC_Os01g15260.1 protein	dynein light chain type 1 domain containing protein, expressed	2.63953	3.91e-08
LOC_Os01g15290.2 protein	ribosomal L18p/L5e family protein, putative, expressed	2.08032	3.57e-07
LOC_Os01g15310.1 protein	LSM domain containing protein, expressed	2.19115	4.54e-07
LOC_Os01g15350.1 protein	zinc finger C-x8-C-x5-C-x3-H type family protein, expressed	2.16378	2.83e-06
LOC_Os01g15448.1 protein	expressed protein	2.37382	8.73e-07
LOC_Os01g15460.2 protein	zinc finger C-x8-C-x5-C-x3-H type family protein, expressed	1.70556	4.54e-06
LOC_Os01g15480.1 protein	EMB3013, putative, expressed	1.48453	7.34e-06
LOC_Os01g15490.1 protein	phosphoadenosine phosphosulfate, putative, expressed	1.18561	0.0146028
LOC_Os01g15600.1 protein	PUR ALPHA-1, putative, expressed	1.58663	1.95e-06
LOC_Os01g15640.1 protein	no apical meristem protein, putative, expressed	1.47494	3.54e-05
LOC_Os01g15850.1 protein	expressed protein	1.35011	0.000127293
LOC_Os01g15900.1 protein	expressed protein	0.956988	0.243579
LOC_Os01g16000.1 protein	CRAL/TRIO domain containing protein, expressed	1.65137	2.72e-06
LOC_Os01g16010.2 protein	BCAS2 protein, putative, expressed	1.58097	1.38e-06
LOC_Os01g16040.1 protein	mitochondrial carrier protein, putative, expressed	1.4601	3.88e-06
LOC_Os01g16080.1 protein	expressed protein	1.93031	2.04e-05
LOC_Os01g16090.1 protein	RNA binding protein, putative, expressed	1.27028	0.000400255
LOC_Os01g16100.1 protein	translin, putative, expressed	1.56353	4.27e-06
LOC_Os01g16110.1 protein	la domain containing protein, putative, expressed	2.47775	5.41e-08
LOC_Os01g16146.1 protein	phenazine biosynthesis protein, putative, expressed	1.57244	3.64e-06
LOC_Os01g16152.1 protein	peroxiredoxin, putative, expressed	1.02589	0.53393
LOC_Os01g16180.2 protein	MT-A70 domain containing protein, expressed	1.62552	5.5e-05
LOC_Os01g16190.1 protein	26S proteasome non-ATPase regulatory subunit 14, putative, expressed	1.77972	1.88e-06
LOC_Os01g16220.1 protein	Sad1 / UNC-like C-terminal domain containing protein, putative, expressed	1.45399	1.05e-05
LOC_Os01g16290.1 protein	DNA gyrase subunit B, chloroplast/mitochondrial precursor, putative, expressed	1.38203	3.47e-05
LOC_Os01g16340.1 protein	expressed protein	1.62042	2.08e-06
LOC_Os01g16350.1 protein	hydroxymethylglutaryl-CoA lyase, putative, expressed	1.51506	3.24e-06
LOC_Os01g16414.3 protein	actin, putative, expressed	1.49675	4.14e-05
LOC_Os01g16430.1 protein	cysteine proteinase inhibitor precursor protein, putative, expressed	1.83029	5.54e-07
LOC_Os01g16450.1 protein	peroxidase precursor, putative, expressed	2.02702	3.91e-07
LOC_Os01g16510.1 protein	expressed protein	1.78046	2.3e-05
LOC_Os01g16520.1 protein	glutamyl-tRNA synthetase, cytoplasmic, putative, expressed	1.52563	3.95e-05
LOC_Os01g16530.1 protein	OsClp1 - Putative Clp protease homologue, expressed	1.15837	0.00239156
LOC_Os01g16540.1 protein	NEDD8-activating enzyme E1 catalytic subunit, putative, expressed	1.28881	0.000681333
LOC_Os01g16550.1 protein	expressed protein	3.01591	5.68e-08
LOC_Os01g16670.1 protein	BSD domain-containing protein, putative, expressed	1.92884	1.33e-06
LOC_Os01g16870.1 protein	argonaute, putative, expressed	2.08146	3.98e-07
LOC_Os01g16890.1 protein	ribosomal protein L7Ae, putative, expressed	2.3993	1.12e-07
LOC_Os01g16900.2 protein	dehydrogenase, putative, expressed	1.36994	2.79e-05
LOC_Os01g16910.1 protein	outer mitochondrial membrane porin, putative, expressed	1.65533	6.36e-07
LOC_Os01g16940.1 protein	MazG nucleotide pyrophosphohydrolase domain containing protein, expressed	1.50914	1.91e-06
LOC_Os01g16960.1 protein	pyruvate kinase, putative, expressed	2.35863	1.55e-07
LOC_Os01g16970.1 protein	glucosidase II beta subunit-like domain containing protein, expressed	1.70939	1.39e-06
LOC_Os01g17010.1 protein	phospholipid-transporting ATPase, putative, expressed	1.29393	0.00805592
LOC_Os01g17170.1 protein	magnesium-protoporphyrin IX monomethyl ester cyclase,chloroplast precursor, putative, expressed	0.752569	6.5e-05
LOC_Os01g17180.1 protein	proteasome subunit, putative, expressed	1.62433	6.55e-06
LOC_Os01g17190.1 protein	OsCam3 - Calmodulin, expressed	1.64663	6.08e-05
LOC_Os01g17240.1 protein	transporter, major facilitator family, putative, expressed	0.620781	1.27e-06
LOC_Os01g17260.2 protein	transcription factor, putative, expressed	1.28691	5.26e-05
LOC_Os01g17320.1 protein	PPR repeat domain containing protein, putative, expressed	1.78481	1.5e-06
LOC_Os01g17330.2 protein	eukaryotic translation initiation factor 6, putative, expressed	2.34583	3.92e-07
LOC_Os01g17430.1 protein	coatomer subunit beta-1, putative, expressed	1.68934	2.76e-06
LOC_Os01g18050.1 protein	tubulin/FtsZ domain containing protein, putative, expressed	1.98909	2.6e-07
LOC_Os01g18060.1 protein	sugar transporter superfamily, putative, expressed	2.11918	6.46e-07
LOC_Os01g18070.1 protein	bacterial transferase hexapeptide domain containing protein, expressed	1.79579	1.13e-06
LOC_Os01g18170.1 protein	Cupin domain containing protein, expressed	1.19731	0.0175903
LOC_Os01g18210.1 protein	peptidyl-prolyl cis-trans isomerase, putative, expressed	1.14188	0.0181257
LOC_Os01g18320.1 protein	protoporphyrinogen oxidase, chloroplast precursor, putative, expressed	1.27022	0.000107022
LOC_Os01g18630.1 protein	aspartic proteinase oryzasin-1 precursor, putative, expressed	1.4258	4.22e-06
LOC_Os01g18640.1 protein	aminotransferase, putative, expressed	1.68437	3.98e-07
LOC_Os01g18660.1 protein	aminotransferase, putative, expressed	1.58062	1.15e-05
LOC_Os01g18670.1 protein	MDR-like ABC transporter, putative, expressed	1.08896	0.0433457
LOC_Os01g18800.1 protein	#NAME?	1.40612	1.29e-05
LOC_Os01g19020.1 protein	peroxidase precursor, putative, expressed	1.37542	8.32e-05
LOC_Os01g19150.2 protein	#NAME?	0.778438	0.000661242
LOC_Os01g19170.1 protein	polygalacturonase, putative, expressed	0.944804	0.277888
LOC_Os01g19220.1 protein	beta-D-xylosidase, putative, expressed	1.15988	0.0116193
LOC_Os01g19450.1 protein	ATP-citrate synthase subunit 1, putative, expressed	1.83824	1.21e-06
LOC_Os01g19470.1 protein	nodal modulator 1 precursor, putative, expressed	1.50073	1.03e-05
LOC_Os01g19490.1 protein	pentatricopeptide, putative, expressed	1.92398	9.1e-07
LOC_Os01g19548.2 protein	pentatricopeptide, putative, expressed	2.05202	8.48e-07
LOC_Os01g19610.1 protein	plant protein of unknown function domain containing protein, expressed	1.02699	0.502267
LOC_Os01g19740.1 protein	calvin cycle protein CP12, putative, expressed	0.387428	2.33e-06
LOC_Os01g19760.1 protein	expressed protein	1.40455	8.33e-05
LOC_Os01g19820.2 protein	universal stress protein domain containing protein, putative, expressed	1.32925	0.00109037
LOC_Os01g19940.1 protein	expressed protein	1.51773	0.000679738
LOC_Os01g20110.1 protein	expressed protein	1.50094	4.52e-06
LOC_Os01g20830.1 protein	heavy metal-associated domain containing protein, expressed	0.977815	0.546228
LOC_Os01g20840.1 protein	lipase class 3 family protein, putative, expressed	0.886197	0.0542423
LOC_Os01g21034.1 protein	pectinesterase, putative, expressed	1.094	0.0342407
LOC_Os01g21070.1 protein	endoglucanase, putative, expressed	2.41285	2.25e-07
LOC_Os01g21160.1 protein	2-oxo acid dehydrogenases acyltransferase domain containing protein, expressed	1.72236	5.35e-07
LOC_Os01g21180.1 protein	translation machinery-associated protein 20, putative, expressed	2.37168	2.11e-07
LOC_Os01g21320.1 protein	NAD dependent epimerase/dehydratase family domain containing protein, expressed	1.69773	3.61e-06
LOC_Os01g21450.1 protein	expressed protein	1.1481	0.00418882
LOC_Os01g21560.1 protein	esterase/lipase/thioesterase family protein, putative, expressed	1.35814	4.01e-05
LOC_Os01g21610.1 protein	uncharacterized aarF domain-containing protein kinase 4, putative, expressed	1.47202	3.1e-05
LOC_Os01g21630.1 protein	pectinacetylesterase domain containing protein, expressed	2.76515	8.15e-08
LOC_Os01g21820.1 protein	preprotein translocase subunit secA, chloroplast precursor, putative, expressed	0.684967	1.22e-05
LOC_Os01g21850.1 protein	protein transport protein-related, putative, expressed	1.62151	1.48e-06
LOC_Os01g21860.1 protein	AGAP010768-PA, putative, expressed	1.57631	1.36e-05
LOC_Os01g21940.1 protein	WD domain, G-beta repeat domain containing protein, expressed	1.66589	1.32e-06
LOC_Os01g21960.1 protein	serine/threonine-protein kinase, putative, expressed	1.59788	5.94e-06
LOC_Os01g21990.1 protein	CRS2-associated factor 2, chloroplast precursor, putative, expressed	1.21412	0.000888178
LOC_Os01g22010.2 protein	S-adenosylmethionine synthetase, putative, expressed	1.62947	2.76e-06
LOC_Os01g22230.1 protein	peroxidase precursor, putative, expressed	1.19369	0.0015162
LOC_Os01g22249.1 protein	peroxidase precursor, putative, expressed	1.36118	0.000138094
LOC_Os01g22352.1 protein	peroxidase precursor, putative, expressed	1.47413	3.85e-05
LOC_Os01g22370.1 protein	peroxidase precursor, putative, expressed	1.50375	1.84e-05
LOC_Os01g22390.2 protein	WD domain containing protein, putative, expressed	1.69866	1.07e-06
LOC_Os01g22490.1 protein	40S ribosomal protein S27a, putative, expressed	1.91663	1.05e-06
LOC_Os01g22500.1 protein	craniofacial development protein 1, putative, expressed	1.58671	1.1e-06
LOC_Os01g22510.1 protein	cyclase/dehydrase family protein, expressed	1.00612	0.856243
LOC_Os01g22520.1 protein	dihydrolipoyl dehydrogenase 1, mitochondrial precursor, putative, expressed	0.839837	0.000449644
LOC_Os01g22600.1 protein	mitochondrial carrier protein, putative, expressed	1.40992	9.12e-05
LOC_Os01g22630.2 protein	ECT protein, putative, expressed	1.76584	2.7e-06
LOC_Os01g22660.1 protein	GDSL-like lipase/acylhydrolase, putative, expressed	1.96299	3.21e-07
LOC_Os01g22780.1 protein	GDSL-like lipase/acylhydrolase, putative, expressed	1.19149	0.00722768
LOC_Os01g22900.1 protein	neutral/alkaline invertase, putative, expressed	1.4207	0.000542697
LOC_Os01g22980.1 protein	OsSCP3 - Putative Serine Carboxypeptidase homologue, expressed	0.788942	6.42e-05
LOC_Os01g23380.1 protein	stripe rust resistance protein Yr10, putative, expressed	1.42044	6.6e-06
LOC_Os01g23590.1 protein	suppressor of Mek, putative, expressed	1.39686	0.000138094
LOC_Os01g23610.1 protein	dihydrolipoyl dehydrogenase, putative, expressed	1.30773	4.69e-05
LOC_Os01g23620.1 protein	miro, putative, expressed	1.72363	5.17e-07
LOC_Os01g23640.1 protein	mov34/MPN/PAD-1 family protein, expressed	1.82679	3.07e-06
LOC_Os01g23680.1 protein	rossmann fold nucleotide-binding protein involved in DNA uptake, putative, expressed	0.801351	0.00022803
LOC_Os01g23740.1 protein	OsPDIL2-2 protein disulfide isomerase PDIL2-2, expressed	2.20461	1.18e-07
LOC_Os01g24020.1 protein	expressed protein	1.7747	2.29e-06
LOC_Os01g24090.1 protein	TPR repeat, putative, expressed	0.79492	0.00104472
LOC_Os01g24680.1 protein	3-hydroxyacyl-CoA dehydrogenase, putative, expressed	2.21192	1.47e-07
LOC_Os01g24690.1 protein	60S ribosomal protein L23A, putative, expressed	1.89969	3.5e-07
LOC_Os01g24710.1 protein	jacalin-like lectin domain containing protein, expressed	2.09403	1.37e-05
LOC_Os01g24750.1 protein	Ser/Thr protein phosphatase family protein, putative, expressed	1.58216	2.25e-06
LOC_Os01g24950.2 protein	exocyst complex component 6, putative, expressed	1.6044	9.88e-06
LOC_Os01g24980.1 protein	naringenin,2-oxoglutarate 3-dioxygenase, putative, expressed	1.75975	1.47e-06
LOC_Os01g25320.1 protein	auxilin, putative, expressed	1.5727	2.29e-06
LOC_Os01g25330.2 protein	SAC9, putative, expressed	1.30349	0.000119319
LOC_Os01g25370.1 protein	SUMO protease, putative, expressed	1.74002	1.65e-05
LOC_Os01g25386.1 protein	multidrug resistance-associated protein, putative, expressed	1.21175	0.00090177
LOC_Os01g25440.1 protein	thiamin pyrophosphokinase 1, putative, expressed	1.18296	0.000910343
LOC_Os01g25484.1 protein	ferredoxin--nitrite reductase, putative, expressed	0.389456	9.37e-07
LOC_Os01g25560.1 protein	RALFL7 - Rapid ALkalinization Factor RALF family protein precursor, expressed	1.34331	0.00122951
LOC_Os01g25600.1 protein	tetratricopeptide repeat domain containing protein, expressed	0.826188	0.00150844
LOC_Os01g25610.1 protein	40S ribosomal protein S4, putative, expressed	1.78714	3.28e-07
LOC_Os01g25820.1 protein	respiratory burst oxidase, putative, expressed	1.70427	9.66e-07
LOC_Os01g25880.1 protein	dephospho-CoA kinase, putative, expressed	1.29054	0.000395878
LOC_Os01g25990.2 protein	expressed protein	0.726224	1.86e-05
LOC_Os01g26020.1 protein	expressed protein	2.18019	7.04e-07
LOC_Os01g26039.1 protein	expressed protein	0.89288	0.0149658
LOC_Os01g26160.1 protein	exportin 1, putative, expressed	2.12798	2.24e-07
LOC_Os01g26920.1 protein	expressed protein	1.04928	0.185094
LOC_Os01g26970.5 protein	expressed protein	1.21917	0.00062196
LOC_Os01g27020.1 protein	transposon protein, putative, unclassified, expressed	1.37147	0.00755436
LOC_Os01g27040.1 protein	chromatin-remodeling complex ATPase chain, putative, expressed	1.5868	1.39e-06
LOC_Os01g27150.1 protein	cullin, putative, expressed	1.24326	0.00340531
LOC_Os01g27160.1 protein	cullin, putative, expressed	1.99188	3.26e-06
LOC_Os01g27210.1 protein	glutathione S-transferase, putative, expressed	3.20787	6.64e-08
LOC_Os01g27360.1 protein	glutathione S-transferase, putative, expressed	0.938975	0.299199
LOC_Os01g27520.1 protein	tRNA synthetases class II domain containing protein, expressed	2.10481	1.07e-07
LOC_Os01g27720.1 protein	E3 ubiquitin-protein ligase MGRN1, putative, expressed	1.46487	1.75e-05
LOC_Os01g27730.1 protein	GTPase of unknown function domain containing protein, putative, expressed	3.17448	3.91e-08
LOC_Os01g27750.1 protein	bifunctional 3-dehydroquinate dehydratase/shikimate dehydrogenase,chloroplast precursor, putative, expressed	1.59118	1.04e-06
LOC_Os01g27880.1 protein	sucrose-phosphatase, putative, expressed	1.16227	0.00277451
LOC_Os01g27940.1 protein	cyclin-L1-1, putative, expressed	1.39532	6.73e-05
LOC_Os01g27990.1 protein	NPL4, putative, expressed	1.43505	2.3e-05
LOC_Os01g28500.1 protein	SCP-like extracellular protein, expressed	2.68525	1.3e-07
LOC_Os01g28540.1 protein	stress regulated protein, putative, expressed	0.849721	0.00118898
LOC_Os01g28730.1 protein	protein kinase domain containing protein, expressed	1.31327	3.8e-05
LOC_Os01g29330.1 protein	expressed protein	0.484875	1.26e-06
LOC_Os01g29409.1 protein	tRNA methyltransferase, putative, expressed	1.3004	6.7e-05
LOC_Os01g29469.1 protein	dual specificity protein phosphatase, putative, expressed	1.142	0.00277451
LOC_Os01g31110.1 protein	CRS2-associated factor 1, chloroplast precursor, putative, expressed	1.47668	1.92e-05
LOC_Os01g31220.1 protein	expressed protein	1.98627	6.7e-06
LOC_Os01g31470.1 protein	mov34/MPN/PAD-1 family protein, expressed	1.44162	8.8e-06
LOC_Os01g31580.1 protein	BZIP protein, putative, expressed	1.53083	0.000366778
LOC_Os01g31610.1 protein	tyrosyl-tRNA synthetase, putative, expressed	0.826051	0.00125144
LOC_Os01g31629.3 protein	expressed protein	1.56503	1.56e-05
LOC_Os01g31680.1 protein	uncharacterized protein sll0194, putative, expressed	1.00931	0.848423
LOC_Os01g31690.1 protein	oxygen-evolving enhancer protein 1, chloroplast precursor, putative, expressed	0.368281	1.48e-07
LOC_Os01g31770.2 protein	oxidoreductase, 2OG-Fe oxygenase family protein, putative, expressed	1.46951	2.3e-05
LOC_Os01g31810.2 protein	RNA recognition motif containing protein, putative, expressed	1.08818	0.0894087
LOC_Os01g31980.1 protein	MATE efflux family protein, putative, expressed	1.52058	6.21e-05
LOC_Os01g32080.1 protein	thiamine pyrophosphate enzyme, C-terminal TPP binding domain containing protein, expressed	1.39586	7.46e-06
LOC_Os01g32184.1 protein	tetratricopeptide repeat protein 5, putative, expressed	1.5325	7.67e-06
LOC_Os01g32280.1 protein	transmembrane protein, putative, expressed	1.42276	0.000126661
LOC_Os01g32330.1 protein	heavy metal-associated domain containing protein, expressed	1.30101	0.000462944
LOC_Os01g32350.1 protein	OsClp2 - Putative Clp protease homologue, expressed	1.24852	0.000106429
LOC_Os01g32660.1 protein	- STE kinases include homologs to sterile 7, sterile 11 and sterile 20 from yeast, expressed	1.68033	5.35e-07
LOC_Os01g32670.1 protein	expressed protein	2.33226	9.75e-08
LOC_Os01g32720.1 protein	expressed protein	1.31466	0.00346461
LOC_Os01g32730.1 protein	tetratricopeptide repeat containing protein, putative, expressed	1.43213	8.04e-05
LOC_Os01g32750.1 protein	TATA binding protein-associated factor, putative, expressed	1.44573	1.59e-05
LOC_Os01g32780.1 protein	universal stress protein domain containing protein, putative, expressed	1.88416	2.4e-07
LOC_Os01g32790.1 protein	expressed protein	1.54563	1.02e-05
LOC_Os01g32800.1 protein	proteasome subunit, putative, expressed	1.49968	9.18e-06
LOC_Os01g32830.1 protein	expressed protein	0.660817	1.76e-05
LOC_Os01g32870.1 protein	heat shock protein DnaJ, putative, expressed	1.45119	3.95e-06
LOC_Os01g32880.1 protein	AP-3 complex subunit delta, putative, expressed	1.51132	5.36e-05
LOC_Os01g32964.1 protein	protein phosphotase protein, putative, expressed	1.14367	0.00526949
LOC_Os01g32980.1 protein	mitochondrial carrier protein, putative, expressed	1.65353	7.07e-06
LOC_Os01g33020.1 protein	trafficking protein particle complex subunit 1, putative, expressed	1.97222	1.63e-07
LOC_Os01g33030.1 protein	Brix domain containing protein, putative, expressed	4.23947	2.82e-08
LOC_Os01g33050.2 protein	ribosomal protein L24, putative, expressed	1.77909	1.04e-06
LOC_Os01g33060.1 protein	HEAT repeat family protein, putative, expressed	1.25656	0.00108956
LOC_Os01g33160.1 protein	stress responsive A/B Barrel domain containing protein, expressed	2.34251	1.65e-07
LOC_Os01g33420.1 protein	glycosyl hydrolase family protein 27, putative, expressed	1.34714	0.00116058
LOC_Os01g33800.1 protein	heat shock protein DnaJ, putative, expressed	1.42815	5.65e-05
LOC_Os01g34060.1 protein	MYB family transcription factor, putative, expressed	1.983	3.79e-07
LOC_Os01g34080.1 protein	armadillo/beta-catenin-like repeat family protein, expressed	1.33806	0.000138148
LOC_Os01g34190.1 protein	G-patch domain containing protein, expressed	1.90469	1.65e-07
LOC_Os01g34200.1 protein	AATF, putative, expressed	1.61129	8.44e-06
LOC_Os01g34330.1 protein	BAH domain containing protein, expressed	1.54811	5.18e-06
LOC_Os01g34350.1 protein	RNA-dependent RNA polymerase, putative, expressed	1.18557	0.0129899
LOC_Os01g34480.1 protein	NAD dependent epimerase/dehydratase family protein, putative, expressed	2.05859	1.86e-07
LOC_Os01g34620.1 protein	#NAME?	1.3568	1.85e-05
LOC_Os01g34700.1 protein	dienelactone hydrolase family protein, expressed	1.83549	7.86e-07
LOC_Os01g34780.2 protein	protein binding protein, putative, expressed	1.74737	3.17e-07
LOC_Os01g34860.1 protein	expressed protein	1.92005	8.57e-07
LOC_Os01g34890.1 protein	GLUCAN SYNTHASE-LIKE protein, putative, expressed	1.33835	0.000380214
LOC_Os01g35040.1 protein	ZOS1-09 - C2H2 zinc finger protein, expressed	1.32227	1.62e-05
LOC_Os01g35050.1 protein	early-responsive to dehydration protein-related, putative, expressed	1.384	1.9e-05
LOC_Os01g35184.1 protein	#NAME?	1.1025	0.109073
LOC_Os01g35580.2 protein	expressed protein	1.95468	1.33e-06
LOC_Os01g36080.1 protein	protein phosphatase 2C containing protein, expressed	1.86146	9.29e-07
LOC_Os01g36090.1 protein	DNA-damage-repair/toleration protein DRT102, putative, expressed	1.47654	3.35e-06
LOC_Os01g36240.1 protein	peroxidase precursor, putative, expressed	1.32033	0.000417174
LOC_Os01g36390.1 protein	MCM4 - Putative minichromosome maintenance MCM complex subunit 4, expressed	1.46566	6.15e-05
LOC_Os01g36600.1 protein	PPR repeat domain containing protein, putative, expressed	1.75498	3.24e-06
LOC_Os01g36620.1 protein	pectate lyase family protein, expressed	1.44222	0.000526569
LOC_Os01g36640.1 protein	disease resistance protein RPM1, putative, expressed	1.81075	6.91e-06
LOC_Os01g36840.1 protein	ATP-binding region, ATPase-like domain containing protein, expressed	1.54856	4.91e-06
LOC_Os01g36860.1 protein	DEAD-box ATP-dependent RNA helicase 40, putative, expressed	1.56902	1.51e-06
LOC_Os01g36920.2 protein	DEAD-box ATP-dependent RNA helicase, putative, expressed	1.53793	1.34e-06
LOC_Os01g36930.1 protein	ubiquitin carboxyl-terminal hydrolase 6, putative, expressed	1.67096	8.14e-07
LOC_Os01g36940.1 protein	OsFBX13 - F-box domain containing protein, expressed	1.94947	1.67e-07
LOC_Os01g37130.1 protein	protein phosphatase 2C, putative, expressed	0.651131	3.9e-06
LOC_Os01g37470.1 protein	asp/Glu racemase, putative, expressed	1.69588	1.16e-05
LOC_Os01g37480.1 protein	expressed protein	1.72253	6.73e-07
LOC_Os01g37510.1 protein	peptide deformylase, putative, expressed	0.82497	0.000613774
LOC_Os01g37560.2 protein	chaperone protein dnaJ 49, putative, expressed	1.5841	1.55e-06
LOC_Os01g37590.1 protein	peptide transporter PTR2, putative, expressed	0.831871	0.00898819
LOC_Os01g37770.1 protein	RWD domain containing protein, expressed	1.21145	0.0121592
LOC_Os01g37790.1 protein	expressed protein	1.40358	0.000124005
LOC_Os01g37800.1 protein	ras-related protein, putative, expressed	1.5729	2.78e-06
LOC_Os01g37820.1 protein	oxidoreductase/ transition metal ion binding protein, putative, expressed	1.31102	3.81e-05
LOC_Os01g37825.1 protein	M16 domain containing zinc peptidase, putative, expressed	1.32578	0.000472017
LOC_Os01g37832.1 protein	thioredoxin, putative, expressed	1.34167	7.19e-05
LOC_Os01g37837.1 protein	seryl-tRNA synthetase, putative, expressed	2.08411	1.02e-07
LOC_Os01g37870.4 protein	PPR repeat domain containing protein, putative, expressed	1.19164	0.0102521
LOC_Os01g37910.1 protein	vacuolar-processing enzyme precursor, putative, expressed	1.30133	0.000124005
LOC_Os01g37960.1 protein	hydrolase, putative, expressed	1.54968	3.95e-06
LOC_Os01g37980.1 protein	vesicle transport v-SNARE protein, putative, expressed	1.66299	2.23e-06
LOC_Os01g38229.1 protein	peptidyl-prolyl isomerase, putative, expressed	1.55616	1.18e-06
LOC_Os01g38480.1 protein	GA18326-PA, putative, expressed	2.0667	3.04e-07
LOC_Os01g38510.1 protein	protein transport protein Sec61 subunit beta, putative, expressed	1.35904	0.000144091
LOC_Os01g38620.1 protein	3-5 exonuclease/ nucleic acid binding protein, putative, expressed	2.00034	2.67e-07
LOC_Os01g38660.1 protein	expressed protein	1.47415	1.22e-05
LOC_Os01g38900.1 protein	#NAME?	1.54432	8.09e-06
LOC_Os01g38950.1 protein	- CK1 includes the casein kinase 1 kinases, expressed	2.31347	3.26e-07
LOC_Os01g38970.1 protein	carbamoyl-phosphate synthase large chain, putative, expressed	1.34471	1.98e-05
LOC_Os01g38980.1 protein	calmodulin-binding protein, putative, expressed	1.45055	5.19e-05
LOC_Os01g39000.2 protein	ZmGR2c, putative, expressed	1.22246	0.00104688
LOC_Os01g39134.1 protein	EF hand family protein, putative, expressed	1.5128	3.85e-05
LOC_Os01g39250.1 protein	OsFtsH4 FtsH protease, homologue of AtFtsH4, expressed	1.59309	2.68e-06
LOC_Os01g39260.1 protein	OsFtsH5 FtsH protease, homologue of AtFtsH4, expressed	1.60991	1.41e-06
LOC_Os01g39270.1 protein	NAD binding domain of 6-phosphogluconate dehydrogenase containing protein, expressed	0.80414	0.000254362
LOC_Os01g39290.1 protein	harpin-induced protein 1 domain containing protein, expressed	2.61114	2.87e-07
LOC_Os01g39310.1 protein	SEY1, putative, expressed	1.60528	5.52e-06
LOC_Os01g39380.1 protein	SCD1, putative, expressed	1.44528	6.5e-05
LOC_Os01g39780.1 protein	expressed protein	1.17161	0.00933567
LOC_Os01g39790.1 protein	esterase/lipase/thioesterase, putative, expressed	1.48621	5.58e-06
LOC_Os01g39800.1 protein	esterase, putative, expressed	1.41478	6.09e-06
LOC_Os01g39830.1 protein	beta-galactosidase, putative, expressed	2.14551	3.82e-07
LOC_Os01g39860.1 protein	1-aminocyclopropane-1-carboxylate oxidase protein, putative, expressed	1.59916	8.42e-06
LOC_Os01g39960.1 protein	lycopene epsilon cyclase, chloroplast precursor, putative, expressed	0.989699	0.750453
LOC_Os01g40050.1 protein	peptidyl-prolyl cis-trans isomerase, putative, expressed	1.37399	1.22e-05
LOC_Os01g40070.1 protein	expressed protein	1.17876	0.00908276
LOC_Os01g40094.1 protein	protein phosphatase 2C, putative, expressed	0.917865	0.171394
LOC_Os01g40110.1 protein	ZOS1-11 - C2H2 zinc finger protein, expressed	3.2295	3.49e-08
LOC_Os01g40250.1 protein	down-regulated in metastasis family protein, expressed	2.13041	4.32e-07
LOC_Os01g40310.1 protein	expressed protein	0.431371	2.73e-07
LOC_Os01g40340.1 protein	SIT4 phosphatase-associated protein domain containing protein, expressed	1.89865	2.75e-07
LOC_Os01g40420.1 protein	CBS domain containing membrane protein, putative, expressed	1.58533	1.81e-06
LOC_Os01g40470.1 protein	vacuolar ATP synthase subunit d, putative, expressed	1.64989	1.29e-06
LOC_Os01g40550.1 protein	hsp20/alpha crystallin family protein, putative, expressed	1.39852	1.77e-05
LOC_Os01g40570.1 protein	outer mitochondrial membrane porin, putative, expressed	1.7754	4.13e-07
LOC_Os01g40580.1 protein	hypersensitive-induced response protein, putative, expressed	1.45326	9.8e-05
LOC_Os01g40610.1 protein	coiled-coil domain-containing protein, putative, expressed	1.33961	8.09e-05
LOC_Os01g40620.1 protein	Uncharacterized ACR, COG1565 containing protein, putative, expressed	1.08546	0.0508255
LOC_Os01g40630.1 protein	uncharacterized protein PA4923, putative, expressed	0.869311	0.00303492
LOC_Os01g40640.1 protein	S1 RNA binding domain containing protein, expressed	1.19698	0.000725782
LOC_Os01g40650.1 protein	expressed protein	0.821219	0.000527855
LOC_Os01g40670.1 protein	single myb histone, putative, expressed	1.32438	0.000223068
LOC_Os01g40690.1 protein	holocarboxylase synthetase, putative, expressed	3.67169	2.79e-07
LOC_Os01g40710.1 protein	high light inducible protein, putative, expressed	0.621305	1.08e-06
LOC_Os01g40750.1 protein	expressed protein	2.84401	2.27e-07
LOC_Os01g40860.1 protein	aldehyde dehydrogenase, putative, expressed	2.36422	1.79e-07
LOC_Os01g40870.1 protein	aldehyde dehydrogenase, putative, expressed	0.909012	0.202211
LOC_Os01g40980.1 protein	helicase, putative, expressed	1.75388	8.6e-06
LOC_Os01g40990.2 protein	expressed protein	1.54901	4.7e-06
LOC_Os01g41030.1 protein	ribosomal protein L25, putative, expressed	1.46316	1.69e-05
LOC_Os01g41190.1 protein	glycine-rich protein, putative, expressed	1.87793	6.57e-07
LOC_Os01g41220.1 protein	DUF538 domain containing protein, putative, expressed	1.17777	0.00422579
LOC_Os01g41550.1 protein	aspartic proteinase, putative, expressed	1.75282	2.16e-05
LOC_Os01g41610.2 protein	mitochondrial ATP synthase g subunit family protein, putative, expressed	1.86346	3.85e-07
LOC_Os01g41630.1 protein	serine/threonine protein phosphatase 2A 55 kDa regulatory subunit B, putative, expressed	1.5005	7.01e-06
LOC_Os01g41640.1 protein	expressed protein	2.99247	2.82e-07
LOC_Os01g41880.1 protein	hyaluronan/mRNA binding family domain containing protein, expressed	2.37524	6.35e-07
LOC_Os01g42010.1 protein	expressed protein	1.46021	3.02e-05
LOC_Os01g42080.1 protein	zinc ion binding protein, putative, expressed	1.41941	6.04e-06
LOC_Os01g42120.1 protein	expressed protein	1.60656	3.65e-06
LOC_Os01g42140.1 protein	expressed protein	1.11153	0.0703298
LOC_Os01g42234.2 protein	amino acid permease family protein, putative, expressed	1.93566	4.68e-05
LOC_Os01g42260.1 protein	transcriptional corepressor LEUNIG, putative, expressed	1.40424	6.42e-06
LOC_Os01g42294.1 protein	inactive receptor kinase At2g26730 precursor, putative, expressed	1.16181	0.00186348
LOC_Os01g42380.1 protein	pleiotropic drug resistance protein, putative, expressed	2.61795	1.49e-07
LOC_Os01g42460.1 protein	BAH domain containing protein, expressed	1.70221	6.62e-06
LOC_Os01g42470.2 protein	acetyltransferase, GNAT family, putative, expressed	1.79443	2.73e-07
LOC_Os01g42480.1 protein	Yip1 domain containing protein, expressed	1.44875	1.8e-05
LOC_Os01g42490.1 protein	endonuclease/exonuclease/phosphatase family domain containing protein, expressed	1.60472	3.48e-06
LOC_Os01g42520.1 protein	expressed protein	2.77108	3.82e-07
LOC_Os01g42650.1 protein	cytochrome c oxidase subunit 5B, mitochondrial precursor, putative, expressed	1.37559	0.000413764
LOC_Os01g42720.1 protein	expressed protein	1.09614	0.177104
LOC_Os01g42730.1 protein	GDSL-like lipase/acylhydrolase, putative, expressed	1.32437	4.11e-05
LOC_Os01g42770.1 protein	expressed protein	1.27413	0.000104497
LOC_Os01g42800.1 protein	MEE18, putative, expressed	0.910749	0.0189186
LOC_Os01g42820.2 protein	RNA recognition motif containing protein, putative, expressed	1.59365	1.6e-06
LOC_Os01g42830.1 protein	adaptin ear-binding coat-associated protein 2, putative, expressed	1.50013	0.000643424
LOC_Os01g42850.1 protein	ThiF family domain containing protein, putative, expressed	1.38641	2.4e-05
LOC_Os01g42870.1 protein	transferase family protein, putative, expressed	1.6303	8.56e-07
LOC_Os01g42880.1 protein	transferase family protein, putative, expressed	1.73146	3.83e-07
LOC_Os01g42950.1 protein	protein kinase family protein, putative, expressed	1.83215	2.2e-06
LOC_Os01g42970.1 protein	zinc finger C-x8-C-x5-C-x3-H type family protein, expressed	1.27171	5.29e-05
LOC_Os01g42980.1 protein	ribosomal protein L22, putative, expressed	2.07369	2.3e-06
LOC_Os01g42990.1 protein	PPR repeat domain containing protein, putative, expressed	1.99706	1.48e-07
LOC_Os01g43020.1 protein	CTP synthase, putative, expressed	1.97351	6.35e-07
LOC_Os01g43030.1 protein	tetratricopeptide repeat domain containing protein, expressed	1.94971	3.85e-07
LOC_Os01g43070.1 protein	psbP-related thylakoid lumenal protein 4, chloroplast precursor, putative, expressed	1.07412	0.13832
LOC_Os01g43090.1 protein	oxidoreductase, aldo/keto reductase family protein, putative, expressed	1.52107	1.89e-06
LOC_Os01g43120.1 protein	DEAD/DEAH box helicase, putative, expressed	2.06974	2.86e-07
LOC_Os01g43130.1 protein	DEAD/DEAH box helicase, putative, expressed	1.95871	6.26e-07
LOC_Os01g43150.1 protein	OsFtsH9 FtsH protease, homologue of AtFtsH11, expressed	1.14303	0.00551271
LOC_Os01g43160.1 protein	polygalacturonase, putative, expressed	1.57524	1.22e-05
LOC_Os01g43170.1 protein	polypyrimidine tract-binding protein, putative, expressed	1.79973	7.75e-07
LOC_Os01g43250.1 protein	WD domain, G-beta repeat domain containing protein, expressed	1.2926	0.000104862
LOC_Os01g43270.1 protein	hydroquinone glucosyltransferase, putative, expressed	1.344	0.0010037
LOC_Os01g43330.1 protein	extra-large G-protein-related, putative, expressed	1.59998	0.00398032
LOC_Os01g43360.1 protein	myosin-Ie, putative, expressed	1.87883	2.78e-07
LOC_Os01g43390.1 protein	uroporphyrinogen decarboxylase, putative, expressed	1.15742	0.00203592
LOC_Os01g43410.1 protein	#NAME?	1.51161	1.59e-05
LOC_Os01g43520.2 protein	neutral ceramidase precursor, putative, expressed	1.51392	1.2e-05
LOC_Os01g43540.1 protein	suppressor of G2 allele of SKP1, putative, expressed	1.98529	2.24e-07
LOC_Os01g43630.1 protein	adaptin, putative, expressed	1.66489	1.94e-06
LOC_Os01g43710.1 protein	cytochrome P450 72A1, putative, expressed	2.19587	3.2e-07
LOC_Os01g43740.1 protein	cytochrome P450 72A1, putative, expressed	4.91705	3.03e-08
LOC_Os01g44050.1 protein	siroheme synthase, putative, expressed	0.855718	0.140853
LOC_Os01g44110.1 protein	serine/threonine-protein kinase, putative, expressed	2.3343	6.72e-07
LOC_Os01g44130.1 protein	aspartic proteinase oryzasin-1 precursor, putative, expressed	1.78047	2.05e-05
LOC_Os01g44210.1 protein	50S ribosomal protein L31, putative, expressed	0.899289	0.151612
LOC_Os01g44230.1 protein	transcription factor X1, putative, expressed	1.8407	5.26e-07
LOC_Os01g44310.1 protein	dnaJ domain containing protein, expressed	2.13111	6.83e-06
LOC_Os01g44360.1 protein	CBS domain containing membrane protein, putative, expressed	1.17323	0.0240303
LOC_Os01g44394.1 protein	mitotic checkpoint protein, putative, expressed	1.54074	2.44e-06
LOC_Os01g44430.1 protein	retrotransposon protein, putative, unclassified, expressed	1.11841	0.0117728
LOC_Os01g45070.1 protein	peptide deformylase, putative, expressed	1.06836	0.0979401
LOC_Os01g45140.1 protein	anthocyanin 3-O-beta-glucosyltransferase, putative, expressed	1.59064	2e-06
LOC_Os01g45190.1 protein	DEAD-box ATP-dependent RNA helicase, putative, expressed	1.61894	1.12e-06
LOC_Os01g45200.1 protein	cinnamoyl-CoA reductase-related, putative, expressed	1.83842	0.0111231
LOC_Os01g45274.1 protein	carbonic anhydrase, chloroplast precursor, putative, expressed	0.797714	0.000752089
LOC_Os01g45274.2 protein	carbonic anhydrase, chloroplast precursor, putative, expressed	0.352871	7.23e-08
LOC_Os01g45380.1 protein	protein kinase domain containing protein, expressed	1.25424	0.000197236
LOC_Os01g45390.2 protein	HD domain containing protein 2, putative, expressed	1.62928	4.24e-06
LOC_Os01g45439.1 protein	expressed protein	1.25211	0.0079285
LOC_Os01g45470.1 protein	expressed protein	1.75764	2.7e-06
LOC_Os01g45530.1 protein	single-stranded DNA-binding protein, putative, expressed	1.41007	7.27e-06
LOC_Os01g45640.1 protein	tat pathway signal sequence family protein, expressed	4.3224	6.64e-08
LOC_Os01g45750.1 protein	bile acid sodium symporter family protein, putative, expressed	0.954898	0.313987
LOC_Os01g45910.1 protein	plastidic ATP/ADP-transporter, putative, expressed	1.59664	1.98e-06
LOC_Os01g46060.1 protein	NUC189 domain containing protein, expressed	2.97418	6e-08
LOC_Os01g46070.1 protein	lactate/malate dehydrogenase, putative, expressed	1.3374	1.23e-05
LOC_Os01g46080.1 protein	GDSL-like lipase/acylhydrolase, putative, expressed	1.35655	2.2e-05
LOC_Os01g46120.1 protein	GDSL-like lipase/acylhydrolase, putative, expressed	1.14938	0.00679063
LOC_Os01g46350.1 protein	proteins of unknown function domain containing protein, expressed	1.96195	3.58e-07
LOC_Os01g46380.1 protein	ketol-acid reductoisomerase, chloroplast precursor, putative, expressed	1.71687	1.38e-06
LOC_Os01g46400.1 protein	expressed protein	1.59336	7.07e-06
LOC_Os01g46510.1 protein	peptidase S8 and S53, subtilisin, kexin, sedolisin, putative, expressed	1.46551	1.67e-05
LOC_Os01g46600.1 protein	seed maturation protein PM41, putative, expressed	2.0423	4.51e-05
LOC_Os01g46610.1 protein	dehydrogenase, putative, expressed	1.37594	9.75e-06
LOC_Os01g46710.1 protein	transposon protein, putative, CACTA, En/Spm sub-class, expressed	1.73003	1.89e-06
LOC_Os01g46750.1 protein	AMP-binding enzyme, putative, expressed	1.56696	1.54e-06
LOC_Os01g46810.1 protein	viral A-type inclusion protein repeat containing protein, expressed	1.45015	2.02e-05
LOC_Os01g46932.1 protein	vacuolar protein-sorting-associated protein 25, putative, expressed	1.85104	2.41e-06
LOC_Os01g46980.1 protein	vacuolar ATP synthase subunit E, putative, expressed	1.64164	1.58e-06
LOC_Os01g47080.1 protein	pyruvate kinase, putative, expressed	3.05468	1.3e-07
LOC_Os01g47190.1 protein	phosphoglycerate mutase, putative, expressed	0.699388	7.2e-06
LOC_Os01g47256.2 protein	exosome complex exonuclease RRP40, putative, expressed	2.06891	2.91e-07
LOC_Os01g47330.1 protein	ribosomal protein L7/L12 C-terminal domain containing protein, expressed	0.792192	0.00596971
LOC_Os01g47340.1 protein	iron-sulfur cluster assembly enzyme ISCU, mitochondrial precursor, putative, expressed	1.55551	2.13e-05
LOC_Os01g47350.1 protein	enoyl-CoA hydratase/isomerase family protein, putative, expressed	1.15124	0.00817299
LOC_Os01g47400.1 protein	OsMan01 - Endo-Beta-Mannanase, expressed	1.94093	1.29e-06
LOC_Os01g47420.1 protein	pterin-4-alpha-carbinolamine dehydratase, putative, expressed	1.14314	0.0138661
LOC_Os01g47430.1 protein	protein of unknown function DUF1296 domain containing protein, expressed	1.48342	6.38e-06
LOC_Os01g47450.1 protein	OsCttP1 - Putative C-terminal processing peptidase homologue, expressed	0.986277	0.664438
LOC_Os01g47470.1 protein	serine/threonine-protein kinase, putative, expressed	1.33172	0.0249533
LOC_Os01g47490.3 protein	Lg106, putative, expressed	1.83129	1.76e-05
LOC_Os01g47550.1 protein	kinase, pfkB family, putative, expressed	1.30633	3.44e-05
LOC_Os01g47620.1 protein	expressed protein	1.10145	0.0296855
LOC_Os01g47650.1 protein	vacuolar protein sorting-associated protein 16, putative, expressed	1.66437	0.000193167
LOC_Os01g47690.1 protein	metallo-beta-lactamase family protein, putative, expressed	1.59663	2.23e-06
LOC_Os01g47730.1 protein	ras-related protein, putative, expressed	1.12367	0.0153928
LOC_Os01g47760.1 protein	#NAME?	1.75195	7.77e-06
LOC_Os01g47770.1 protein	CS domain containing protein, putative, expressed	0.790119	0.00426913
LOC_Os01g47780.1 protein	fasciclin domain containing protein, expressed	1.4026	0.000226802
LOC_Os01g48180.1 protein	DDT domain containing protein, putative, expressed	1.55775	8.07e-06
LOC_Os01g48200.1 protein	callose synthase, putative, expressed	1.64829	2.51e-05
LOC_Os01g48270.1 protein	AAA-type ATPase family protein, putative, expressed	1.43695	1.36e-05
LOC_Os01g48280.1 protein	ubiquitin-conjugating enzyme, putative, expressed	1.19132	0.0013628
LOC_Os01g48300.4 protein	ATP synthase protein I related, putative, expressed	0.938017	0.229024
LOC_Os01g48310.1 protein	expressed protein	1.12383	0.025551
LOC_Os01g48320.1 protein	transcription factor like protein, putative, expressed	1.46655	1.16e-05
LOC_Os01g48330.1 protein	protein kinase domain containing protein, expressed	1.28603	0.00913109
LOC_Os01g48380.1 protein	PPR repeat domain containing protein, putative, expressed	1.54739	5.86e-06
LOC_Os01g48420.1 protein	peroxiredoxin, putative, expressed	1.72314	6.59e-07
LOC_Os01g48500.1 protein	expressed protein	1.10502	0.0133337
LOC_Os01g48680.1 protein	two pore calcium channel protein 1, putative, expressed	1.10381	0.0441913
LOC_Os01g48690.1 protein	ribosomal protein rpS20, putative, expressed	0.783895	0.000111775
LOC_Os01g48720.1 protein	RNA polymerase III subunit RPC82 family protein, putative, expressed	1.75458	9.63e-06
LOC_Os01g48760.1 protein	THAP domain-containing protein 4, putative, expressed	1.71097	4.48e-07
LOC_Os01g48790.1 protein	YT521-B-like family domain containing protein, expressed	1.69158	5.87e-07
LOC_Os01g48810.1 protein	transcription initiation factor TFIID subunit 11, putative, expressed	2.37542	2.73e-07
LOC_Os01g48820.1 protein	expressed protein	0.933268	0.216453
LOC_Os01g48830.1 protein	expressed protein	1.52932	8.01e-05
LOC_Os01g48850.1 protein	auxin-responsive protein, putative, expressed	1.5367	8.2e-05
LOC_Os01g48874.1 protein	wax synthase, putative, expressed	1.13151	0.0154631
LOC_Os01g48910.2 protein	AMP-binding enzyme, putative, expressed	1.66998	1.01e-05
LOC_Os01g48930.1 protein	splicing factor-related, putative, expressed	1.31492	0.000125951
LOC_Os01g48960.1 protein	glutamate synthase, chloroplast precursor, putative, expressed	0.997688	0.955012
LOC_Os01g48980.1 protein	GPI transamidase component family protein, putative, expressed	1.30361	0.00284485
LOC_Os01g48990.1 protein	uncharacterized kinase mug58, putative, expressed	0.742482	1.9e-05
LOC_Os01g49000.1 protein	katanin p60 ATPase-containing subunit, putative, expressed	1.83868	1.08e-06
LOC_Os01g49120.1 protein	MATE efflux family protein, putative, expressed	1.80552	3.78e-07
LOC_Os01g49150.1 protein	anti-silencing protein, ASF1-like domain containing protein, expressed	1.49209	2.49e-06
LOC_Os01g49190.1 protein	ATP synthase, putative, expressed	1.46626	2.01e-05
LOC_Os01g49250.1 protein	methyltransferase, putative, expressed	1.83655	3.7e-07
LOC_Os01g49290.1 protein	WD repeat-containing protein, putative, expressed	2.03869	2.28e-07
LOC_Os01g49320.1 protein	glycosyl hydrolase, putative, expressed	1.43115	7.37e-06
LOC_Os01g49330.1 protein	formyl transferase, putative, expressed	0.837408	0.000629939
LOC_Os01g49340.1 protein	arginine/serine-rich coiled-coil protein 1, putative, expressed	1.58892	1.6e-06
LOC_Os01g49350.1 protein	DUF292 domain containing protein, expressed	1.38656	0.000199578
LOC_Os01g49360.1 protein	FAD-binding and arabino-lactone oxidase domains containing protein, putative, expressed	1.61176	2.9e-05
LOC_Os01g49380.1 protein	lipase, putative, expressed	1.60872	5.7e-06
LOC_Os01g49470.1 protein	E3 ubiquitin ligase, putative, expressed	0.836332	0.00234762
LOC_Os01g49529.1 protein	OsWAK10d - OsWAK receptor-like cytoplasmic kinase OsWAK-RLCK, expressed	1.31667	0.000665855
LOC_Os01g49670.1 protein	cytidylyltransferase domain containing protein, expressed	1.17391	0.0120415
LOC_Os01g49690.1 protein	Ser/Thr protein phosphatase family protein, putative, expressed	1.33386	2.77e-05
LOC_Os01g49740.1 protein	expressed protein	1.0224	0.53608
LOC_Os01g49760.1 protein	expressed protein	1.31519	3.61e-05
LOC_Os01g49890.1 protein	threonine synthase, chloroplast precursor, putative, expressed	1.2694	0.00014443
LOC_Os01g49900.1 protein	peptidyl-tRNA hydrolase, mitochondrial precursor protein, putative, expressed	1.49385	1.41e-05
LOC_Os01g49940.1 protein	ESP4, putative, expressed	1.42344	2.61e-05
LOC_Os01g50030.1 protein	CPuORF25 - conserved peptide uORF-containing transcript, expressed	1.39175	6.9e-05
LOC_Os01g50050.1 protein	polyprenyl synthetase, putative, expressed	0.695917	1.57e-05
LOC_Os01g50100.1 protein	ABC transporter, ATP-binding protein, putative, expressed	2.19308	2.39e-07
LOC_Os01g50120.2 protein	expressed protein	1.23087	0.000228618
LOC_Os01g50160.1 protein	MDR-like ABC transporter, putative, expressed	2.13268	5.35e-07
LOC_Os01g50170.1 protein	eukaryotic aspartyl protease domain containing protein, expressed	1.12596	0.00884307
LOC_Os01g50200.1 protein	UDP-glucoronosyl and UDP-glucosyl transferase domain containing protein, expressed	1.47369	5.76e-06
LOC_Os01g50310.1 protein	VIP1 protein, putative, expressed	1.48232	2.08e-06
LOC_Os01g50320.1 protein	surp module family protein, putative, expressed	1.15788	0.00194914
LOC_Os01g50330.1 protein	strictosidine synthase 1 precursor, putative, expressed	1.49721	8.58e-06
LOC_Os01g50360.1 protein	NAC domain containing protein, putative, expressed	1.30101	0.00309922
LOC_Os01g50450.1 protein	expressed protein	1.43	8.03e-06
LOC_Os01g50622.1 protein	DNA-binding protein DSP1, putative, expressed	0.810869	0.000888597
LOC_Os01g50760.1 protein	polyprenyl synthetase, putative, expressed	0.90268	0.0527405
LOC_Os01g50770.1 protein	adaptor complexes medium subunit family domain containing protein, expressed	1.75307	1.5e-06
LOC_Os01g50910.1 protein	late embryogenesis abundant protein, group 3, putative, expressed	2.54051	1.53e-06
LOC_Os01g50930.1 protein	expressed protein	1.09132	0.0259254
LOC_Os01g50940.1 protein	helix-loop-helix DNA-binding domain containing protein, expressed	0.539849	3.11e-06
LOC_Os01g50960.1 protein	RNA polymerase II transcriptional coactivator KELP, putative, expressed	1.69234	2.3e-05
LOC_Os01g51010.1 protein	DUF292 domain containing protein, expressed	1.41272	2.16e-05
LOC_Os01g51020.1 protein	60S ribosomal protein L28-1, putative, expressed	2.23093	7.23e-08
LOC_Os01g51120.1 protein	vesicle transport v-SNARE protein, putative, expressed	0.896049	0.0211302
LOC_Os01g51154.1 protein	single myb histone, putative, expressed	2.0425	1.2e-06
LOC_Os01g51170.1 protein	glycylpeptide N-tetradecanoyltransferase 1, putative, expressed	1.71253	7.2e-07
LOC_Os01g51200.1 protein	- CK1 includes the casein kinase 1 kinases, expressed	1.88155	7.49e-07
LOC_Os01g51220.1 protein	transport protein particle component, Bet3, domain containing protein, expressed	2.0949	2.96e-07
LOC_Os01g51280.1 protein	5-nucleotidase surE, putative, expressed	1.31949	3.57e-05
LOC_Os01g51300.1 protein	WD domain, G-beta repeat domain containing protein, expressed	1.79648	3.59e-06
LOC_Os01g51300.2 protein	WD domain, G-beta repeat domain containing protein, expressed	1.45309	4.11e-06
LOC_Os01g51360.1 protein	lipase, putative, expressed	1.03004	0.386726
LOC_Os01g51390.1 protein	mitochondrial-processing peptidase subunit, mitochondrial precursor, putative, expressed	1.21765	0.000787109
LOC_Os01g51410.1 protein	glycine dehydrogenase, putative, expressed	0.860859	0.00269355
LOC_Os01g51530.1 protein	methyltransferase domain containing protein, expressed	0.895874	0.00627947
LOC_Os01g51540.1 protein	cytidine/deoxycytidylate deaminase, putative, expressed	2.02152	7.64e-07
LOC_Os01g51570.1 protein	glycosyl hydrolases family 17, putative, expressed	1.23652	0.00122115
LOC_Os01g51640.1 protein	expressed protein	1.61284	4.87e-05
LOC_Os01g51700.1 protein	ras-related protein, putative, expressed	1.52502	4.38e-06
LOC_Os01g51710.1 protein	zinc knuckle domain containing protein, expressed	0.869513	0.0349419
LOC_Os01g51754.1 protein	alpha-amylase precursor, putative, expressed	0.916999	0.0328995
LOC_Os01g51754.4 protein	alpha-amylase precursor, putative, expressed	0.788955	0.000234922
LOC_Os01g51770.1 protein	outer mitochondrial membrane porin, putative, expressed	1.8755	8.55e-06
LOC_Os01g51840.1 protein	IQ calmodulin-binding motif family protein, putative, expressed	2.1061	2.23e-06
LOC_Os01g51860.1 protein	violaxanthin de-epoxidase, putative, expressed	1.13859	0.00467633
LOC_Os01g51870.1 protein	methyltransferase, putative, expressed	2.05275	2.56e-07
LOC_Os01g51890.1 protein	endonuclease/exonuclease/phosphatase family domain containing protein, expressed	0.971303	0.5132
LOC_Os01g51920.1 protein	phosphotransferase, putative, expressed	1.63251	0.000274863
LOC_Os01g51980.1 protein	alliin lyase precursor, putative, expressed	1.37093	0.0006045
LOC_Os01g52010.1 protein	alliin lyase precursor, putative, expressed	1.33315	2.74e-05
LOC_Os01g52050.1 protein	systemin receptor SR160 precursor, putative, expressed	1.89029	1.13e-06
LOC_Os01g52090.1 protein	transcription factor like protein, putative, expressed	1.40726	5.53e-05
LOC_Os01g52170.1 protein	expressed protein	0.949865	0.132264
LOC_Os01g52214.1 protein	ubiquinone oxidoreductase, putative, expressed	1.56398	1.81e-06
LOC_Os01g52240.1 protein	chlorophyll A-B binding protein, putative, expressed	0.231159	3.49e-08
LOC_Os01g52250.1 protein	starch synthase, putative, expressed	1.66302	0.000413462
LOC_Os01g52260.1 protein	serine acetyltransferase protein, putative, expressed	1.26023	0.01781
LOC_Os01g52390.1 protein	plasminogen activator inhibitor 1 RNA-binding protein, putative, expressed	1.73124	5.29e-05
LOC_Os01g52470.1 protein	elongation factor, putative, expressed	6.22876	2.82e-08
LOC_Os01g52490.1 protein	40S ribosomal protein S24, putative, expressed	2.16411	2.11e-07
LOC_Os01g52500.2 protein	NADP-dependent malic enzyme, putative, expressed	1.51523	1.7e-06
LOC_Os01g52530.1 protein	phosphoribosyl transferase, putative, expressed	1.24979	0.000163894
LOC_Os01g52550.1 protein	ABC transporter, ATP-binding protein, putative, expressed	1.65657	1.59e-05
LOC_Os01g52630.1 protein	regulator of chromosome condensation, putative, expressed	1.94316	7.49e-07
LOC_Os01g52720.1 protein	Complex I intermediate-associated protein 30 domain containing protein, putative, expressed	1.54088	1.57e-05
LOC_Os01g52750.1 protein	OsSub3 - Putative Subtilisin homologue, expressed	1.23886	0.00240023
LOC_Os01g52770.1 protein	GDSL-like lipase/acylhydrolase, putative, expressed	1.77194	4.28e-07
LOC_Os01g52780.1 protein	HVA22, putative, expressed	1.45237	1.19e-05
LOC_Os01g52864.1 protein	transmembrane protein, putative, expressed	1.02865	0.472943
LOC_Os01g53000.1 protein	trehalose synthase, putative, expressed	1.34651	1.9e-05
LOC_Os01g53020.1 protein	heat shock protein DnaJ, putative, expressed	0.477118	3.48e-07
LOC_Os01g53060.1 protein	peroxisomal membrane protein, putative, expressed	0.915439	0.247321
LOC_Os01g53079.1 protein	ubiquitin domain-containing protein 1, putative, expressed	0.979418	0.66015
LOC_Os01g53090.1 protein	pathogen-related protein, putative, expressed	0.576375	1.46e-05
LOC_Os01g53140.1 protein	expressed protein	1.55171	5.33e-06
LOC_Os01g53150.1 protein	GTPase of unknown function domain containing protein, putative, expressed	1.87172	3.13e-07
LOC_Os01g53240.1 protein	BURP domain containing protein, expressed	1.50983	7.17e-05
LOC_Os01g53330.1 protein	anthocyanidin 5,3-O-glucosyltransferase, putative, expressed	0.389274	8.53e-07
LOC_Os01g53350.1 protein	anthocyanidin 5,3-O-glucosyltransferase, putative, expressed	1.22406	0.000821868
LOC_Os01g53420.1 protein	anthocyanidin 5,3-O-glucosyltransferase, putative, expressed	1.6533	2.34e-05
LOC_Os01g53520.1 protein	reticulon domain containing protein, putative, expressed	1.72067	6.28e-06
LOC_Os01g53560.1 protein	phosphoesterase, putative, expressed	1.34571	3.65e-05
LOC_Os01g53600.1 protein	farnesyltransferase subunit beta, putative, expressed	1.41967	9.7e-05
LOC_Os01g53610.1 protein	selenium-binding protein, related, putative, expressed	2.14406	1.18e-07
LOC_Os01g53670.1 protein	ENTH domain containing protein, expressed	1.58599	6.54e-06
LOC_Os01g53680.1 protein	6-phosphofructokinase, putative, expressed	1.75189	7.05e-07
LOC_Os01g53700.1 protein	mitochondrial-processing peptidase subunit, mitochondrial precursor, putative, expressed	1.70774	9.27e-06
LOC_Os01g53720.2 protein	expressed protein	1.06461	0.128929
LOC_Os01g53750.1 protein	glucan endo-1,3-beta-glucosidase precursor, putative, expressed	1.83733	7.75e-07
LOC_Os01g53800.1 protein	glutamate carboxypeptidase 2, putative, expressed	1.32383	0.00125701
LOC_Os01g53810.1 protein	peptidase, putative, expressed	1.1063	0.0294548
LOC_Os01g53890.1 protein	RNA methyltransferase, TrmH family protein, putative, expressed	1.60725	4.04e-06
LOC_Os01g53900.1 protein	elongation factor, putative, expressed	1.49789	7.17e-05
LOC_Os01g53910.1 protein	dehydrogenase, putative, expressed	1.24431	0.000330069
LOC_Os01g53930.1 protein	hexokinase, putative, expressed	0.952481	0.172984
LOC_Os01g54010.1 protein	peptidase, putative, expressed	1.67611	6.54e-07
LOC_Os01g54020.1 protein	tRNA synthetase, putative, expressed	0.880348	0.0202521
LOC_Os01g54080.1 protein	kinesin motor protein-related, putative, expressed	1.46862	1.3e-05
LOC_Os01g54119.1 protein	retrotransposon protein, putative, unclassified, expressed	1.62682	2.63e-05
LOC_Os01g54240.1 protein	nucleoporin, putative, expressed	1.86661	5.48e-07
LOC_Os01g54370.1 protein	dihydropyrimidinase, putative, expressed	1.2152	0.000422193
LOC_Os01g54390.2 protein	S4 domain containing protein, putative, expressed	1.06943	0.499943
LOC_Os01g54400.1 protein	VQ domain containing protein, putative, expressed	1.72776	2.68e-05
LOC_Os01g54480.1 protein	serine/threonine protein kinase, putative, expressed	1.6033	8.2e-06
LOC_Os01g54510.1 protein	MAC/Perforin domain containing protein, putative, expressed	1.43935	2.11e-05
LOC_Os01g54540.1 protein	ribosomal protein L13, putative, expressed	0.92485	0.0791393
LOC_Os01g54560.1 protein	trehalose synthase, putative, expressed	1.39034	2.78e-05
LOC_Os01g54590.1 protein	ras-related protein, putative, expressed	1.45063	5.73e-06
LOC_Os01g54620.1 protein	CESA4 - cellulose synthase, expressed	1.09105	0.100041
LOC_Os01g54700.1 protein	retrotransposon protein, putative, unclassified, expressed	2.04832	1.33e-07
LOC_Os01g54784.1 protein	expressed protein	1.18794	0.00252522
LOC_Os01g54860.1 protein	enoyl-CoA hydratase/isomerase family protein, putative, expressed	1.68339	1.07e-06
LOC_Os01g54870.1 protein	60S ribosomal protein L18a, putative, expressed	2.25622	3.88e-07
LOC_Os01g54880.1 protein	glucosidase 2 subunit beta precursor, putative, expressed	1.50031	1.32e-05
LOC_Os01g54910.1 protein	GTP-binding protein typA/bipA, putative, expressed	1.6788	1.29e-06
LOC_Os01g54920.1 protein	heat- and acid-stable phosphoprotein, putative, expressed	2.79085	6.86e-07
LOC_Os01g54940.1 protein	dehydrogenase, putative, expressed	1.20607	0.000452593
LOC_Os01g54960.1 protein	expressed protein	1.43086	9.81e-06
LOC_Os01g55030.1 protein	DNA-binding protein-related, putative, expressed	2.27258	1.83e-07
LOC_Os01g55040.1 protein	1,3-beta-glucan synthase component, putative, expressed	1.45166	0.000216276
LOC_Os01g55050.1 protein	protein of unknown function DUF1421 domain containing protein, expressed	1.59841	1.17e-06
LOC_Os01g55170.1 protein	la domain containing protein, expressed	2.10365	2.34e-06
LOC_Os01g55190.1 protein	expressed protein	2.20973	1e-07
LOC_Os01g55290.1 protein	PPR repeat domain containing protein, putative, expressed	1.24654	0.00325756
LOC_Os01g55350.1 protein	phosphoenolpyruvate carboxylase, putative, expressed	1.39639	1.44e-05
LOC_Os01g55360.2 protein	phosphatidate cytidylyltransferase, putative, expressed	1.53497	8.16e-06
LOC_Os01g55490.1 protein	transcriptional regulator family protein, putative, expressed	1.55678	3.9e-06
LOC_Os01g55540.1 protein	aminotransferase, classes I and II, domain containing protein, expressed	2.36333	1.19e-07
LOC_Os01g55570.1 protein	expressed protein	0.343695	2.07e-07
LOC_Os01g55580.1 protein	tesmin/TSO1-like CXC domain containing protein, expressed	1.11953	0.0114322
LOC_Os01g55590.1 protein	AMP-binding enzyme, putative, expressed	1.68828	7.18e-07
LOC_Os01g55690.1 protein	glutelin, putative, expressed	0.786013	0.593649
LOC_Os01g55700.1 protein	NLI interacting factor-like phosphatase, putative, expressed	1.49904	4.31e-06
LOC_Os01g55730.1 protein	AGAP003732-PA, putative, expressed	2.39919	7.93e-08
LOC_Os01g55750.1 protein	TCP family transcription factor, putative, expressed	1.66085	0.000187515
LOC_Os01g55770.1 protein	expressed protein	1.79489	4.96e-06
LOC_Os01g55780.1 protein	glycerophosphoryl diester phosphodiesterase family protein, putative, expressed	1.60039	1.15e-06
LOC_Os01g55830.1 protein	glutathione S-transferase, putative, expressed	2.48102	1.11e-07
LOC_Os01g55870.1 protein	chorismate mutase, chloroplast precursor, putative, expressed	1.54921	1.74e-06
LOC_Os01g55890.2 protein	amino acid kinase, putative, expressed	1.4501	1.31e-05
LOC_Os01g55950.1 protein	acetamidase, putative, expressed	1.29993	0.000193062
LOC_Os01g56000.1 protein	RNA recognition motif containing protein, expressed	1.28477	0.00135301
LOC_Os01g56100.1 protein	BSD domain containing protein, expressed	1.35287	0.000209361
LOC_Os01g56130.1 protein	CSLC1 - cellulose synthase-like family C, expressed	1.87122	6.82e-07
LOC_Os01g56140.1 protein	expressed protein	1.23662	0.000251606
LOC_Os01g56150.1 protein	OsProCP1 - Putative Lysosomal Pro-x Carboxypeptidase homologue, expressed	1.04514	0.214247
LOC_Os01g56180.1 protein	expressed protein	1.09104	0.255119
LOC_Os01g56190.1 protein	HVT1, putative, expressed	1.44813	1.72e-05
LOC_Os01g56200.1 protein	BTBA2 - Bric-a-Brac,Tramtrack, Broad Complex BTB domain with Ankyrin repeat region, expressed	1.26225	0.00139988
LOC_Os01g56310.1 protein	radical SAM enzyme, putative, expressed	1.42786	0.014843
LOC_Os01g56330.1 protein	- The CrRLK1L-1 subfamily has homology to the CrRLK1L homolog, expressed	1.69794	2.11e-06
LOC_Os01g56350.3 protein	PTAC12, putative, expressed	1.15297	0.0365978
LOC_Os01g56360.1 protein	wax synthase, putative, expressed	1.66758	4.82e-06
LOC_Os01g56400.1 protein	ABC transporter, ATP-binding protein, putative, expressed	1.17212	0.00552744
LOC_Os01g56460.1 protein	mitochondrial glycoprotein, putative, expressed	2.05219	4.09e-07
LOC_Os01g56470.1 protein	mal d 1-associated protein, putative, expressed	1.47352	2.39e-05
LOC_Os01g56490.1 protein	ubiquitin carboxyl-terminal hydrolase, putative, expressed	1.88609	4.14e-07
LOC_Os01g56510.1 protein	periplasmic beta-glucosidase precursor, putative, expressed	1.11878	0.0289479
LOC_Os01g56520.1 protein	double-stranded RNA binding motif containing protein, expressed	1.91635	2.52e-07
LOC_Os01g56550.1 protein	transcription initiation factor IIF beta subunit, putative, expressed	1.29175	0.000354864
LOC_Os01g56580.2 protein	- CK1 includes the casein kinase 1 kinases, expressed	1.55984	9.16e-07
LOC_Os01g56590.1 protein	guanine nucleotide exchange family protein, putative, expressed	1.85672	4e-06
LOC_Os01g56600.1 protein	signal recognition particle 54 kDa protein, putative, expressed	1.54008	1.63e-06
LOC_Os01g56620.1 protein	pseudouridylate synthase, putative, expressed	1.22381	0.00112698
LOC_Os01g56640.3 protein	transcription factor jumonji, putative, expressed	2.24842	3.11e-06
LOC_Os01g56680.2 protein	photosystem II reaction center W protein, chloroplast precursor, putative, expressed	1.21627	0.00148782
LOC_Os01g56780.2 protein	plus-3 domain containing protein, expressed	1.51077	8.72e-05
LOC_Os01g56790.1 protein	expressed protein	1.18891	0.0192913
LOC_Os01g56800.1 protein	MATH domain containing protein, expressed	1.61089	5.89e-06
LOC_Os01g56820.1 protein	AGAP000951-PA, putative, expressed	1.40048	5.61e-06
LOC_Os01g56880.1 protein	purple acid phosphatase precursor, putative, expressed	2.14895	4.45e-07
LOC_Os01g56910.1 protein	expressed protein	1.55111	7.88e-06
LOC_Os01g56969.1 protein	homeobox-leucine zipper protein ATHB-54, putative, expressed	1.83121	1.86e-06
LOC_Os01g56980.1 protein	histidine acid phosphatase, putative, expressed	1.21322	0.0038387
LOC_Os01g57066.1 protein	transmembrane protein 49, putative, expressed	1.59383	3.15e-06
LOC_Os01g57073.1 protein	insulin-degrading enzyme, putative, expressed	1.70549	1.8e-06
LOC_Os01g57100.1 protein	expressed protein	1.99548	3.45e-06
LOC_Os01g57220.1 protein	secretory carrier-associated membrane protein, putative, expressed	1.74864	6.76e-07
LOC_Os01g57260.1 protein	vacuolar protein sorting-associated protein 28 homolog 2, putative, expressed	1.56664	1.44e-06
LOC_Os01g57410.1 protein	pentatricopeptide repeat domain containing protein, putative, expressed	1.1154	0.0250626
LOC_Os01g57450.1 protein	universal stress protein domain containing protein, putative, expressed	1.92086	7.86e-07
LOC_Os01g57460.1 protein	frataxin, putative, expressed	1.76896	1.95e-06
LOC_Os01g57560.1 protein	serine/threonine-protein kinase receptor precursor, putative, expressed	1.29802	0.000949196
LOC_Os01g57570.1 protein	NADPH-dependent FMN reductase domain containing protein, expressed	1.38226	2.15e-05
LOC_Os01g57630.1 protein	pentatricopeptide containing protein, putative, expressed	2.47733	7.23e-08
LOC_Os01g57710.1 protein	membrane protein, putative, expressed	1.85002	1.11e-06
LOC_Os01g57770.1 protein	OsPOP4 - Putative Prolyl Oligopeptidase homologue, expressed	1.48465	6.46e-06
LOC_Os01g57854.1 protein	pectinesterase, putative, expressed	1.73652	6.4e-07
LOC_Os01g57870.2 protein	disease resistance protein RPS2, putative, expressed	1.44885	0.000133248
LOC_Os01g57880.1 protein	plastocyanin-like domain containing protein, putative, expressed	1.36131	0.000381212
LOC_Os01g57946.1 protein	DNA-directed RNA polymerase subunit alpha, putative, expressed	1.27917	9.93e-05
LOC_Os01g57954.1 protein	translation initiation factor IF-1, chloroplast, putative, expressed	1.23045	0.000421758
LOC_Os01g57962.1 protein	photosystem I P700 chlorophyll a apoprotein A2, putative, expressed	0.493327	1.74e-07
LOC_Os01g58000.1 protein	ATP synthase epsilon chain, putative, expressed	0.473242	1.42e-07
LOC_Os01g58022.1 protein	NADPH-dependent oxidoreductase, putative, expressed	0.6709	3.66e-06
LOC_Os01g58080.1 protein	membrane-associated salt-inducible protein, putative, expressed	1.58221	3.56e-06
LOC_Os01g58114.2 protein	expressed protein	1.14739	0.00368992
LOC_Os01g58194.1 protein	protein disulfide isomerase, putative, expressed	1.05058	0.198134
LOC_Os01g58240.1 protein	OsSub6 - Putative Subtilisin homologue, expressed	1.09083	0.0710905
LOC_Os01g58280.1 protein	OsSub8 - Putative Subtilisin homologue, expressed	1.0316	0.654601
LOC_Os01g58380.1 protein	3-hydroxybutyryl-CoA dehydrogenase, putative, expressed	1.92638	3.55e-07
LOC_Os01g58390.1 protein	haloacid dehalogenase, putative, expressed	0.92055	0.0755334
LOC_Os01g58470.1 protein	expressed protein	0.670192	2.08e-05
LOC_Os01g58580.1 protein	ICE-like protease p20 domain containing protein, putative, expressed	1.46919	1.3e-05
LOC_Os01g58620.1 protein	expressed protein	1.74395	1.88e-06
LOC_Os01g58680.1 protein	apurinic endonuclease-redox protein, putative, expressed	1.9645	2.87e-07
LOC_Os01g58690.1 protein	endonuclease/exonuclease/phosphatase family domain containing protein, expressed	1.87924	3.28e-07
LOC_Os01g58740.1 protein	glycerol-3-phosphate dehydrogenase, putative, expressed	1.62112	6.53e-06
LOC_Os01g58750.1 protein	expressed protein	1.79865	1.81e-06
LOC_Os01g58790.2 protein	GHMP kinases ATP-binding protein, putative, expressed	0.721467	8.73e-06
LOC_Os01g58870.1 protein	domain of unknown function, DUF250 domain containing protein, expressed	1.01806	0.705542
LOC_Os01g58890.1 protein	cysteine proteinase inhibitor precursor protein, putative, expressed	1.59854	2.35e-05
LOC_Os01g59020.1 protein	cytochrome P450, putative, expressed	1.18824	0.00273061
LOC_Os01g59080.1 protein	expressed protein	0.904513	0.0156953
LOC_Os01g59090.1 protein	thylakoid lumenal 20 kDa protein, putative, expressed	0.783619	0.000301782
LOC_Os01g59100.1 protein	cytokinin-N-glucosyltransferase 1, putative, expressed	2.13383	0.000204748
LOC_Os01g59110.1 protein	indole-3-acetate beta-glucosyltransferase, putative, expressed	1.41749	8.51e-06
LOC_Os01g59130.2 protein	proline-rich family protein, putative, expressed	1.73053	6.75e-06
LOC_Os01g59140.1 protein	DNA-directed RNA polymerases I, II, and III subunit RPABC1, putative, expressed	1.46448	7.81e-06
LOC_Os01g59150.1 protein	tubulin/FtsZ domain containing protein, putative, expressed	2.16511	2.19e-07
LOC_Os01g59340.3 protein	dihydropyrimidinase, putative, expressed	1.39066	2.15e-05
LOC_Os01g59490.1 protein	FAD dependent oxidoreductase domain containing protein, expressed	1.43703	0.000731693
LOC_Os01g59500.1 protein	U3 small nucleolar RNA-associated protein 11, putative, expressed	2.28265	3.21e-07
LOC_Os01g59510.1 protein	chloroplast ribonuclease III domain protein, putative, expressed	1.478	2.51e-05
LOC_Os01g59520.2 protein	cupin, RmlC-type, putative, expressed	2.00153	2.27e-07
LOC_Os01g59530.1 protein	OsCML1 - Calmodulin-related calcium sensor protein, expressed	1.12715	0.0892056
LOC_Os01g59600.1 protein	peptidase, T1 family, putative, expressed	1.93175	1.92e-07
LOC_Os01g59620.1 protein	histone-lysine N-methyltransferase, H3 lysine-9 specific SUVH1, putative, expressed	1.38612	5.65e-05
LOC_Os01g59670.1 protein	expressed protein	1.15135	0.039898
LOC_Os01g59740.1 protein	expressed protein	1.52251	1.8e-06
LOC_Os01g59790.3 protein	ADP-ribosylation factor, putative, expressed	1.16576	0.0623417
LOC_Os01g59800.1 protein	EAP30/Vps36 family domain containing protein, expressed	1.4301	9.01e-06
LOC_Os01g59850.1 protein	GTPase-activating protein, putative, expressed	1.43823	8.21e-06
LOC_Os01g59920.1 protein	cysteine synthase, chloroplast precursor, putative, expressed	1.45795	8.15e-06
LOC_Os01g59930.1 protein	NADH-cytochrome b5 reductase, putative, expressed	1.82087	5.04e-07
LOC_Os01g59980.1 protein	zinc finger family protein, putative, expressed	1.18488	0.0027219
LOC_Os01g59990.2 protein	ribosomal protein L24, putative, expressed	2.18117	8.02e-07
LOC_Os01g60190.2 protein	2,3-bisphosphoglycerate-independent phosphoglycerate mutase, putative, expressed	1.3998	5.84e-06
LOC_Os01g60230.3 protein	auxin efflux carrier component, putative, expressed	1.38375	8.71e-06
LOC_Os01g60260.1 protein	KH domain containing protein, putative, expressed	1.64696	0.000818359
LOC_Os01g60280.1 protein	ATP binding protein, putative, expressed	1.02932	0.501662
LOC_Os01g60330.1 protein	inactive receptor kinase At2g26730 precursor, putative, expressed	1.32017	0.000198589
LOC_Os01g60410.3 protein	ubiquitin-conjugating enzyme, putative, expressed	1.84694	4.43e-07
LOC_Os01g60440.1 protein	HEAT repeat family protein, putative, expressed	1.44022	5.04e-05
LOC_Os01g60650.1 protein	non-green plastid inner envelope membrane protein, putative, expressed	1.82379	1.78e-06
LOC_Os01g60660.1 protein	methionyl-tRNA synthetase, putative, expressed	1.91605	2.19e-07
LOC_Os01g60740.1 protein	LTPL16 - Protease inhibitor/seed storage/LTP family protein precursor, expressed	2.2219	2.78e-07
LOC_Os01g60770.1 protein	expansin precursor, putative, expressed	1.69112	1.05e-06
LOC_Os01g60790.1 protein	40S ribosomal protein S26, putative, expressed	2.28012	3.67e-07
LOC_Os01g60830.1 protein	expressed protein	0.6679	3.36e-06
LOC_Os01g61070.1 protein	heavy metal-associated domain containing protein, expressed	1.7222	8.74e-07
LOC_Os01g61120.1 protein	expressed protein	0.817383	0.000730718
LOC_Os01g61150.1 protein	phox domain-containing protein, putative, expressed	1.60227	6.71e-06
LOC_Os01g61200.1 protein	GDSL-like lipase/acylhydrolase, putative, expressed	1.7707	0.000154131
LOC_Os01g61230.1 protein	dihydroflavonol-4-reductase, putative, expressed	0.599256	1.14e-06
LOC_Os01g61320.2 protein	thioredoxin, putative, expressed	2.11918	1.53e-07
LOC_Os01g61380.1 protein	lactate/malate dehydrogenase, putative, expressed	2.60823	1.3e-07
LOC_Os01g61400.1 protein	sufB/sufD domain containing protein, putative, expressed	1.03599	0.27779
LOC_Os01g61410.1 protein	NADH-ubiquinone oxidoreductase, mitochondrial precursor, putative, expressed	0.881796	0.00430053
LOC_Os01g61430.1 protein	HIT zinc finger domain containing protein, expressed	1.43694	7.72e-05
LOC_Os01g61500.1 protein	BAG domain containing protein, expressed	1.71862	3.81e-06
LOC_Os01g61580.1 protein	selT-like protein precursor, putative, expressed	1.55209	4.87e-06
LOC_Os01g61590.1 protein	#NAME?	1.18979	0.00464949
LOC_Os01g61670.1 protein	ureidoglycolate hydrolase, putative, expressed	0.678218	8.49e-05
LOC_Os01g61670.2 protein	ureidoglycolate hydrolase, putative, expressed	1.69791	2.4e-06
LOC_Os01g61710.1 protein	coatomer subunit delta, putative, expressed	1.37436	5.7e-05
LOC_Os01g61720.3 protein	IQ calmodulin-binding motif domain containing protein, expressed	1.47649	1.3e-05
LOC_Os01g61780.1 protein	vacuolar ATP synthase 98 kDa subunit, putative, expressed	1.57184	2.37e-05
LOC_Os01g61814.1 protein	40S ribosomal protein S23, putative, expressed	2.16342	2.14e-07
LOC_Os01g61830.1 protein	zinc finger C-x8-C-x5-C-x3-H type family protein, expressed	1.63332	3.36e-06
LOC_Os01g61880.1 protein	respiratory burst oxidase, putative, expressed	1.05585	0.239564
LOC_Os01g61930.1 protein	SAC3/GANP family protein, putative, expressed	1.69063	1.23e-06
LOC_Os01g61970.1 protein	Lung seven transmembrane receptor domain containing protein, putative, expressed	2.57019	3.47e-07
LOC_Os01g62020.1 protein	NAD dependent epimerase/dehydratase family domain containing protein, expressed	1.24998	0.00760462
LOC_Os01g62040.1 protein	ruvB-like, putative, expressed	1.79114	5.54e-07
LOC_Os01g62060.1 protein	plant-specific domain TIGR01589 family protein, expressed	1.49143	5.72e-05
LOC_Os01g62070.1 protein	cation efflux family protein, putative, expressed	1.32448	0.00118575
LOC_Os01g62160.1 protein	trp repressor/replication initiator, putative, expressed	1.52948	2.83e-06
LOC_Os01g62210.1 protein	50S ribosomal protein L17, putative, expressed	1.72171	5.87e-07
LOC_Os01g62260.1 protein	thaumatin, putative, expressed	1.55793	8.29e-06
LOC_Os01g62290.1 protein	DnaK family protein, putative, expressed	1.59926	5.41e-06
LOC_Os01g62300.1 protein	SLT1 protein, putative, expressed	1.56184	9.32e-06
LOC_Os01g62350.1 protein	60S ribosomal protein L36-2, putative, expressed	2.16176	5.26e-07
LOC_Os01g62420.1 protein	triosephosphate isomerase, cytosolic, putative, expressed	1.49777	2.78e-05
LOC_Os01g62440.1 protein	ribonuclease protein, putative, expressed	1.32124	3.92e-05
LOC_Os01g62460.2 protein	ZOS1-16 - C2H2 zinc finger protein, expressed	1.53167	5.34e-06
LOC_Os01g62650.1 protein	pumilio-family RNA binding protein, putative, expressed	1.98714	7.25e-07
LOC_Os01g62760.1 protein	protein phosphatase 2C, putative, expressed	0.7182	0.000671283
LOC_Os01g62810.2 protein	regulator of chromosome condensation, putative, expressed	1.37101	2.69e-05
LOC_Os01g62820.1 protein	Transcription initiation factor TFIID subunit A containing protein, expressed	1.59589	1.52e-06
LOC_Os01g62840.1 protein	mannose-1-phosphate guanyltransferase, putative, expressed	1.5747	2.05e-06
LOC_Os01g62870.1 protein	oxidoreductase, aldo/keto reductase family protein, putative, expressed	1.98591	6.36e-07
LOC_Os01g62880.1 protein	oxidoreductase, aldo/keto reductase family protein, putative, expressed	1.56824	1.46e-06
LOC_Os01g62900.1 protein	amino acid kinase, putative, expressed	1.38694	6.68e-06
LOC_Os01g62910.1 protein	CRR2, putative, expressed	1.38754	2.78e-05
LOC_Os01g62950.1 protein	ras-related protein, putative, expressed	1.48609	0.000107078
LOC_Os01g62980.1 protein	LTPL101 - Protease inhibitor/seed storage/LTP family protein precursor, expressed	1.40747	0.000215007
LOC_Os01g63190.1 protein	laccase precursor protein, putative, expressed	1.5956	4.69e-05
LOC_Os01g63210.1 protein	SOUL heme-binding protein, putative, expressed	2.07352	3.91e-07
LOC_Os01g63220.3 protein	kinase, pfkB family, putative, expressed	1.1107	0.0281063
LOC_Os01g63250.1 protein	josephin, putative, expressed	1.60285	4.82e-06
LOC_Os01g63270.1 protein	alpha-glucan phosphorylast isozyme, putative, expressed	1.02314	0.518859
LOC_Os01g63354.1 protein	ELM2 domain containing protein, putative, expressed	1.24317	0.000196014
LOC_Os01g63410.1 protein	expressed protein	0.90533	0.0592644
LOC_Os01g63470.1 protein	C2 domain containing protein, expressed	0.959413	0.317834
LOC_Os01g63780.1 protein	nsp1-like C-terminal region family protein, expressed	1.91588	6.18e-07
LOC_Os01g63800.1 protein	pleckstrin homology domain-containing protein, putative, expressed	1.45861	1.95e-05
LOC_Os01g63820.1 protein	double-stranded RNA binding motif containing protein, expressed	1.32812	3.84e-05
LOC_Os01g63854.1 protein	transmembrane amino acid transporter protein, putative, expressed	1.25979	0.000169904
LOC_Os01g63940.1 protein	Transcription initiation factor TFIID subunit A containing protein, expressed	1.92728	9.84e-07
LOC_Os01g63990.1 protein	hydrolase, alpha/beta fold family protein, putative, expressed	0.858685	0.00573547
LOC_Os01g64010.1 protein	dual specificity protein phosphatase, putative, expressed	0.971581	0.68622
LOC_Os01g64090.1 protein	L1P family of ribosomal proteins domain containing protein, expressed	2.07001	3.62e-07
LOC_Os01g64100.1 protein	glycosyl hydrolase, putative, expressed	1.19558	0.0601679
LOC_Os01g64110.1 protein	glycosyl hydrolase, putative, expressed	0.947898	0.263463
LOC_Os01g64190.1 protein	expressed protein	1.80467	5.02e-06
LOC_Os01g64262.1 protein	hydrolase, alpha/beta fold family, putative, expressed	1.28396	0.000168039
LOC_Os01g64270.1 protein	expressed protein	0.796309	0.000217474
LOC_Os01g64280.1 protein	sorting nexin 1, putative, expressed	1.77156	5.76e-07
LOC_Os01g64300.1 protein	DUF584 domain containing protein, putative, expressed	1.15493	0.0428544
LOC_Os01g64470.1 protein	harpin-induced protein 1 domain containing protein, expressed	1.47133	0.000349282
LOC_Os01g64520.1 protein	uricase, putative, expressed	1.58838	2.16e-06
LOC_Os01g64540.1 protein	anthocyanidin 3-O-glucosyltransferase, putative, expressed	0.851926	0.0030655
LOC_Os01g64630.4 protein	actin, putative, expressed	1.21296	0.000384587
LOC_Os01g64650.1 protein	VAMP-like protein YKT62, putative, expressed	1.21098	0.00501191
LOC_Os01g64660.2 protein	fructose-1,6-bisphosphatase, putative, expressed	0.28221	2.82e-08
LOC_Os01g64680.1 protein	bolA, putative, expressed	1.72807	1.1e-06
LOC_Os01g64690.1 protein	LSM domain containing protein, expressed	1.76376	1.62e-06
LOC_Os01g64720.1 protein	expressed protein	1.09583	0.145715
LOC_Os01g64750.1 protein	sterol 3-beta-glucosyltransferase, putative, expressed	1.92179	4.22e-06
LOC_Os01g64770.1 protein	polypyrimidine tract-binding protein, putative, expressed	1.89334	2.78e-07
LOC_Os01g64810.1 protein	zinc finger DHHC domain-containing protein, putative, expressed	1.08988	0.0511453
LOC_Os01g64860.1 protein	OsSub11 - Putative Subtilisin homologue, expressed	0.68476	0.000159618
LOC_Os01g64870.1 protein	expressed protein	1.17097	0.00656974
LOC_Os01g64920.1 protein	nuclear matrix protein 1, putative, expressed	1.98218	0.000497439
LOC_Os01g64960.1 protein	chlorophyll A-B binding protein, putative, expressed	0.269205	3.03e-08
LOC_Os01g65070.1 protein	hydrolase, alpha/beta fold family domain containing protein, expressed	1.3188	0.000119516
LOC_Os01g65080.2 protein	ZOS1-18 - C2H2 zinc finger protein, expressed	1.49542	0.000264091
LOC_Os01g65090.1 protein	aminotransferase, classes I and II, domain containing protein, expressed	1.69907	5e-07
LOC_Os01g65100.1 protein	peptide transporter, putative, expressed	1.42309	0.000214015
LOC_Os01g65210.1 protein	proton-dependent oligopeptide transport, putative, expressed	1.06084	0.211536
LOC_Os01g65220.1 protein	XRN 5'-3' exonuclease N-terminus domain containing protein, expressed	1.771	1.7e-06
LOC_Os01g65260.1 protein	amidophosphoribosyltransferase, chloroplast precursor, putative, expressed	0.59031	2.65e-06
LOC_Os01g65320.1 protein	expressed protein	1.31228	0.00205873
LOC_Os01g65330.1 protein	expressed protein	1.34534	0.000701299
LOC_Os01g65380.1 protein	patellin protein, putative, expressed	1.65937	8.86e-06
LOC_Os01g65400.1 protein	DNA polymerase I, putative, expressed	1.87068	1.07e-06
LOC_Os01g65410.1 protein	serine hydroxymethyltransferase, mitochondrial precursor, putative, expressed	0.701953	4.82e-05
LOC_Os01g65450.1 protein	ubiquitin-like domain-containing CTD phosphatase 1, putative, expressed	1.87501	3.6e-07
LOC_Os01g65460.2 protein	beta-galactosidase precursor, putative, expressed	1.66653	1.77e-06
LOC_Os01g65560.1 protein	snRK1-interacting protein 1, putative, expressed	3.43833	3.49e-08
LOC_Os01g65580.3 protein	mitotic checkpoint family protein, putative, expressed	1.74847	7.15e-07
LOC_Os01g65670.1 protein	amino acid transporter, putative, expressed	2.82733	6.59e-07
LOC_Os01g65690.1 protein	4,5-DOPA dioxygenase extradiol, putative, expressed	2.14239	5.62e-07
LOC_Os01g65780.2 protein	glycosyl transferase, putative, expressed	1.66132	1.41e-06
LOC_Os01g65790.1 protein	pectinesterase, putative, expressed	1.46809	1.54e-05
LOC_Os01g65880.1 protein	nodulin MtN3 family protein, putative, expressed	1.25741	0.00023144
LOC_Os01g65900.1 protein	chitin-inducible gibberellin-responsive protein, putative, expressed	1.21429	0.00124443
LOC_Os01g65902.1 protein	apocytochrome f precursor, putative, expressed	0.50926	2.05e-07
LOC_Os01g66000.1 protein	NADH dehydrogenase I subunit N, putative, expressed	0.670247	3.9e-06
LOC_Os01g66050.1 protein	wound-responsive family protein, putative, expressed	1.00076	0.983271
LOC_Os01g66110.1 protein	methyltransferase, putative, expressed	1.87914	5.44e-07
LOC_Os01g66130.1 protein	armadillo/beta-catenin repeat family protein, putative, expressed	1.59022	2.73e-05
LOC_Os01g66150.1 protein	expressed protein	0.955862	0.255754
LOC_Os01g66170.1 protein	SNARE associated Golgi protein, putative, expressed	0.665376	7.45e-05
LOC_Os01g66240.1 protein	mitochondrion protein, putative, expressed	1.70099	9.44e-07
LOC_Os01g66280.1 protein	transcriptional regulator, putative, expressed	1.10678	0.0183752
LOC_Os01g66300.1 protein	KH domain containing protein, putative, expressed	1.23069	0.000339831
LOC_Os01g66330.1 protein	ATP-dependent Clp protease ATP-binding subunit clpX, putative, expressed	1.37848	2.24e-05
LOC_Os01g66360.1 protein	2-C-methyl-D-erythritol 4-phosphate cytidylyltransferase, putative, expressed	0.729314	1.18e-05
LOC_Os01g66379.1 protein	expressed protein	0.905697	0.103502
LOC_Os01g66420.1 protein	PHD finger protein, putative, expressed	1.43682	3.96e-05
LOC_Os01g66500.1 protein	phosphoribosylformylglycinamidine synthase, putative, expressed	1.7284	9.84e-07
LOC_Os01g66520.1 protein	serine/threonine-protein kinase RIO-like, putative, expressed	1.32857	0.00223157
LOC_Os01g66560.1 protein	signal recognition particle 72 kDa protein, putative, expressed	1.90014	2.74e-07
LOC_Os01g66600.1 protein	rhodanese-like, putative, expressed	1.07664	0.0618742
LOC_Os01g66610.1 protein	serine/threonine-protein kinase receptor precursor, putative, expressed	1.50614	2.03e-05
LOC_Os01g66720.1 protein	NADP-dependent oxidoreductase, putative, expressed	1.82087	1.61e-06
LOC_Os01g66830.1 protein	pectinacetylesterase domain containing protein, expressed	1.05044	0.231084
LOC_Os01g66850.1 protein	pectinacetylesterase domain containing protein, expressed	1.00554	0.897699
LOC_Os01g66940.1 protein	kinase, pfkB family, putative, expressed	1.72918	3.56e-07
LOC_Os01g66960.1 protein	selenoprotein precursor, putative, expressed	1.25141	0.000146994
LOC_Os01g66980.1 protein	expressed protein	0.620158	1.13e-06
LOC_Os01g67000.1 protein	membrane-associated 30 kDa protein, chloroplast precursor, putative, expressed	0.849281	0.00135202
LOC_Os01g67054.1 protein	calreticulin precursor protein, putative, expressed	1.19688	0.0004706
LOC_Os01g67120.1 protein	rhodanese-like domain containing protein, putative, expressed	0.393948	1e-07
LOC_Os01g67134.1 protein	ribosomal L18p/L5e family protein, putative, expressed	2.05808	4.3e-07
LOC_Os01g67160.1 protein	cyclin-dependent kinase B1-1, putative, expressed	2.0331	4.37e-07
LOC_Os01g67180.1 protein	ribonuclease T2 family domain containing protein, expressed	1.14762	0.0368615
LOC_Os01g67210.1 protein	PPR repeat domain containing protein, putative, expressed	1.54699	8.36e-05
LOC_Os01g67220.1 protein	Os1bglu4 - beta-glucosidase-like protein without signal sequence, expressed	1.44684	4.71e-05
LOC_Os01g67240.1 protein	formin-like protein 1 precursor, putative, expressed	1.16047	0.015218
LOC_Os01g67250.1 protein	Rad21 / Rec8 like protein, putative, expressed	1.21454	0.0024212
LOC_Os01g67290.1 protein	cyclin-related protein, putative, expressed	1.44741	3.69e-05
LOC_Os01g67340.1 protein	STRUBBELIG-RECEPTOR FAMILY 8 precursor, putative, expressed	1.47121	1.62e-05
LOC_Os01g67360.1 protein	methyltransferase, putative, expressed	1.29571	0.00935629
LOC_Os01g67370.1 protein	expressed protein	0.893193	0.136546
LOC_Os01g67480.1 protein	helix-loop-helix DNA-binding domain containing protein, expressed	1.22582	0.000710626
LOC_Os01g67510.1 protein	recA protein, putative, expressed	2.71673	6.85e-08
LOC_Os01g67520.1 protein	VTC2, putative, expressed	1.81643	7.05e-07
LOC_Os01g67530.1 protein	AMP-binding enzyme, putative, expressed	1.37806	1.23e-05
LOC_Os01g67550.1 protein	FAD binding domain containing protein, expressed	1.30872	0.0159002
LOC_Os01g67570.1 protein	PDE312/PTAC10, putative, expressed	1.41581	2.88e-05
LOC_Os01g67590.1 protein	oligopeptidase, putative, expressed	1.3726	1.01e-05
LOC_Os01g67720.1 protein	ABC1 family domain containing protein, putative, expressed	1.03435	0.326354
LOC_Os01g67860.1 protein	fructose-bisphospate aldolase isozyme, putative, expressed	1.97243	1.48e-07
LOC_Os01g67880.1 protein	vacuolar protein sorting-associated protein 53, putative, expressed	1.6816	8.74e-07
LOC_Os01g67920.1 protein	tetratricopeptide repeat domain containing protein, expressed	1.2967	0.000587892
LOC_Os01g67960.1 protein	GPI transamidase component PIG-S-related, putative, expressed	1.66831	1.59e-06
LOC_Os01g68030.1 protein	expressed protein	1.64764	1.03e-06
LOC_Os01g68040.1 protein	CorA-like magnesium transporter protein, putative, expressed	1.49518	4.21e-05
LOC_Os01g68060.1 protein	copine, putative, expressed	1.88945	1.88e-06
LOC_Os01g68120.1 protein	DCL3, putative, expressed	1.68768	2.17e-05
LOC_Os01g68160.1 protein	ZOS1-22 - C2H2 zinc finger protein, expressed	1.95778	3.61e-06
LOC_Os01g68300.1 protein	expressed protein	2.11818	1.64e-06
LOC_Os01g68310.1 protein	sas10/Utp3 family protein, expressed	2.60234	1.26e-07
LOC_Os01g68320.2 protein	DEAD-box ATP-dependent RNA helicase 30, putative, expressed	1.85764	1.67e-06
LOC_Os01g68324.3 protein	dolichyl-diphosphooligosaccharide--protein glycosyltransferase 63 kDasubunit precursor, putative, expressed	1.8353	8.82e-07
LOC_Os01g68330.1 protein	antigen peptide transporter-like 1, chloroplast precursor, putative, expressed	0.746069	2.98e-05
LOC_Os01g68380.1 protein	expressed protein	1.51023	4.39e-06
LOC_Os01g68390.1 protein	Uncharacterized ACR, COG1565 containing protein, putative, expressed	1.82402	4.17e-07
LOC_Os01g68450.1 protein	expressed protein	0.37279	5.41e-08
LOC_Os01g68480.1 protein	thioredoxin, putative, expressed	0.734902	0.000125642
LOC_Os01g68630.1 protein	leaf senescence related protein, putative, expressed	0.995219	0.945524
LOC_Os01g68710.2 protein	peptidyl-prolyl cis-trans isomerase, FKBP-type, putative, expressed	2.50427	1.96e-06
LOC_Os01g68750.1 protein	adaptin, putative, expressed	1.61899	4.41e-06
LOC_Os01g68760.1 protein	WW domain containing protein, expressed	1.41826	1.75e-05
LOC_Os01g68770.1 protein	selenium-binding protein, putative, expressed	1.22333	0.000328711
LOC_Os01g68790.3 protein	RNA recognition motif containing protein, putative, expressed	2.26931	8.74e-07
LOC_Os01g68810.1 protein	expressed protein	1.49466	8.1e-06
LOC_Os01g68860.1 protein	zinc finger C-x8-C-x5-C-x3-H type family protein, expressed	0.816828	0.000226049
LOC_Os01g68940.1 protein	ubiquitin family domain containing protein, expressed	2.30742	6.94e-08
LOC_Os01g68950.1 protein	ubiquitin family domain containing protein, expressed	1.69671	3.2e-06
LOC_Os01g69030.4 protein	sucrose-phosphate synthase, putative, expressed	0.4962	2.42e-07
LOC_Os01g69050.2 protein	lysine ketoglutarate reductase trans-splicing related 1, putative, expressed	1.43677	4.5e-05
LOC_Os01g69060.1 protein	hydrolase, alpha/beta fold family domain containing protein, expressed	0.636539	2.2e-06
LOC_Os01g69080.1 protein	acyl-desaturase, chloroplast precursor, putative, expressed	1.16163	0.00248305
LOC_Os01g69090.1 protein	CBS domain-containing protein, putative, expressed	1.41762	0.000101016
LOC_Os01g69100.1 protein	expressed protein	1.26373	0.000484594
LOC_Os01g69110.1 protein	expressed protein	1.38072	8.42e-05
LOC_Os01g69120.1 protein	uncharacterized RNA methyltransferase pc1998, putative, expressed	1.42025	9.61e-05
LOC_Os01g69130.1 protein	dynamin family protein, putative, expressed	1.49686	4.54e-06
LOC_Os01g69200.1 protein	regulatory protein, putative, expressed	1.30201	0.000493402
LOC_Os01g69210.1 protein	mannosyl-oligosaccharide glucosidase, putative, expressed	1.52481	6.98e-06
LOC_Os01g69220.1 protein	exostosin family domain containing protein, expressed	1.09476	0.590693
LOC_Os01g69230.1 protein	exo70 exocyst complex subunit domain containing protein, expressed	1.69621	3.08e-06
LOC_Os01g69250.1 protein	mitochondrial import receptor subunit TOM20, putative, expressed	1.52034	3e-06
LOC_Os01g69900.1 protein	CBS domain-containing protein, putative, expressed	1.10547	0.0242112
LOC_Os01g69950.1 protein	ribosomal protein L27, putative, expressed	0.834059	0.0321421
LOC_Os01g69970.1 protein	WD domain, G-beta repeat domain containing protein, expressed	2.81006	2.86e-07
LOC_Os01g69980.1 protein	TCP family transcription factor, putative, expressed	1.29343	0.000157824
LOC_Os01g69990.1 protein	GYF domain containing protein, putative, expressed	1.82611	4.73e-07
LOC_Os01g70020.1 protein	DEK C terminal domain containing protein, expressed	1.22656	0.000204016
LOC_Os01g70060.1 protein	protein of unknown function, DUF618 domain containing protein, expressed	1.59749	1.22e-05
LOC_Os01g70090.1 protein	enoyl-CoA hydratase/isomerase family protein, putative, expressed	1.65055	7.04e-07
LOC_Os01g70140.1 protein	ubiquitin-conjugating enzyme E2-22 kDa, putative, expressed	1.46026	2.52e-06
LOC_Os01g70160.1 protein	zinc finger, C3HC4 type domain containing protein, expressed	0.844869	0.016302
LOC_Os01g70170.1 protein	transaldolase, putative, expressed	1.83144	2.98e-07
LOC_Os01g70210.1 protein	CRAL/TRIO domain containing protein, expressed	0.731457	4.05e-05
LOC_Os01g70270.1 protein	auxin response factor, putative, expressed	1.63213	9.32e-06
LOC_Os01g70300.1 protein	aspartokinase 3, chloroplast precursor, putative, expressed	1.05156	0.266736
LOC_Os01g70320.1 protein	expressed protein	1.53316	4.74e-06
LOC_Os01g70330.1 protein	prefoldin subunit family protein, expressed	2.39584	8.24e-08
LOC_Os01g70370.1 protein	serine palmitoyltransferase 2, putative, expressed	1.56912	1.85e-06
LOC_Os01g70390.1 protein	expressed protein	1.45704	5.51e-06
LOC_Os01g70400.1 protein	expressed protein	0.514446	2.71e-07
LOC_Os01g70410.2 protein	protein kinase, putative, expressed	1.09134	0.082588
LOC_Os01g70460.2 protein	expressed protein	0.755069	0.00140502
LOC_Os01g70520.1 protein	Os1bglu5 - beta-glucosidase homologue, similar to G. max isohydroxyurate hydrolase, expressed	0.946273	0.144625
LOC_Os01g70540.1 protein	retrotransposon protein, putative, unclassified, expressed	1.07465	0.0646978
LOC_Os01g70550.1 protein	heparan-alpha-glucosaminide N-acetyltransferase, putative, expressed	1.288	0.00226678
LOC_Os01g70670.1 protein	BTBM1 - Bric-a-Brac, Tramtrack, Broad Complex BTB domain with Meprin and TRAF Homology MATH domain, expressed	1.31514	0.000189606
LOC_Os01g70770.1 protein	glutathione S-transferase, putative, expressed	1.44687	5.82e-06
LOC_Os01g70780.1 protein	WD40-like domain containing protein, putative, expressed	1.6062	2.11e-06
LOC_Os01g70790.1 protein	SRC2 protein, putative, expressed	1.24392	0.000669916
LOC_Os01g70800.1 protein	mitochondrial carrier protein, putative, expressed	1.50706	1.13e-05
LOC_Os01g70810.1 protein	homeobox domain containing protein, expressed	1.67404	2.99e-06
LOC_Os01g70820.1 protein	lumenal PsbP, putative, expressed	0.799607	0.000196986
LOC_Os01g70840.2 protein	esterase, putative, expressed	1.66816	3.65e-05
LOC_Os01g70850.1 protein	esterase, putative, expressed	2.52429	1.31e-06
LOC_Os01g70930.1 protein	leucoanthocyanidin dioxygenase, putative, expressed	1.06493	0.253285
LOC_Os01g70940.1 protein	potassium transporter, putative, expressed	1.42749	0.000101569
LOC_Os01g70950.1 protein	spermatogenesis-associated protein 20 precursor, putative, expressed	1.00599	0.899142
LOC_Os01g70960.1 protein	cytochrome c1-1, heme protein, mitochondrial precursor, putative, expressed	1.52186	3.79e-06
LOC_Os01g71000.1 protein	protein kinase APK1B, chloroplast precursor, putative, expressed	1.48733	3.66e-06
LOC_Os01g71050.1 protein	MSP domain containing protein, putative, expressed	1.31225	0.00680012
LOC_Os01g71090.1 protein	xylanase inhibitor, putative, expressed	1.77473	2.16e-06
LOC_Os01g71200.1 protein	RNA recognition motif containing protein, putative, expressed	1.95203	1.75e-07
LOC_Os01g71230.1 protein	nascent polypeptide-associated complex subunit alpha-like protein 3, putative, expressed	2.26375	2.48e-07
LOC_Os01g71262.1 protein	expressed protein	1.32474	0.00477951
LOC_Os01g71270.1 protein	eukaryotic peptide chain release factor subunit 1-1, putative, expressed	2.43001	1.04e-07
LOC_Os01g71300.1 protein	S-formylglutathione hydrolase, putative, expressed	1.45437	3.24e-06
LOC_Os01g71320.1 protein	hexokinase, putative, expressed	1.17062	0.0117583
LOC_Os01g71330.1 protein	expressed protein	0.974134	0.566039
LOC_Os01g71340.1 protein	glycosyl hydrolases family 17, putative, expressed	1.08271	0.205354
LOC_Os01g71350.1 protein	glycosyl hydrolases family 17, putative, expressed	1.48516	0.000416547
LOC_Os01g71420.1 protein	Ser/Thr protein phosphatase family protein, putative, expressed	1.71372	2.34e-06
LOC_Os01g71474.1 protein	glycosyl hydrolases family 17, putative, expressed	1.44832	3.49e-06
LOC_Os01g71540.1 protein	expressed protein	2.15287	4.31e-07
LOC_Os01g71590.1 protein	expressed protein	1.77867	1.75e-06
LOC_Os01g71670.1 protein	glycosyl hydrolases family 17, putative, expressed	2.43602	2.07e-07
LOC_Os01g71770.1 protein	RNA recognition motif containing protein, putative, expressed	1.69389	2.05e-06
LOC_Os01g71810.1 protein	glycosyl hydrolases family 17, putative, expressed	1.28184	0.000756195
LOC_Os01g71970.1 protein	GRAS family transcription factor containing protein, expressed	1.30559	6.5e-05
LOC_Os01g71990.1 protein	pyrroline-5-carboxylate reductase, putative, expressed	1.42472	1.27e-05
LOC_Os01g72000.1 protein	armadillo repeat-containing protein, putative, expressed	0.94772	0.726771
LOC_Os01g72049.1 protein	retrotransposon, putative, centromere-specific, expressed	1.8129	5.96e-06
LOC_Os01g72080.1 protein	calmodulin-like protein 1, putative, expressed	3.32081	2.41e-07
LOC_Os01g72100.1 protein	OsCML10 - Calmodulin-related calcium sensor protein, expressed	2.03515	1.7e-06
LOC_Os01g72200.1 protein	expressed protein	1.53272	1.32e-05
LOC_Os01g72205.1 protein	proline synthetase co-transcribed bacterial homolog protein, putative, expressed	0.591069	1.32e-06
LOC_Os01g72220.1 protein	WD domain, G-beta repeat domain containing protein, expressed	1.71072	5.57e-07
LOC_Os01g72240.1 protein	uridine 5-monophosphate synthase, putative, expressed	2.45402	6.85e-08
LOC_Os01g72250.1 protein	uridine 5-monophosphate synthase, putative, expressed	1.86184	1.29e-06
LOC_Os01g72260.1 protein	cytochrome P450, putative, expressed	0.876409	0.00749723
LOC_Os01g72290.1 protein	expressed protein	1.78031	8.52e-06
LOC_Os01g72300.1 protein	Cupin domain containing protein, expressed	1.21432	0.00735767
LOC_Os01g72340.1 protein	beta-galactosidase, putative, expressed	1.59842	3.8e-06
LOC_Os01g72420.1 protein	C2 domain containing protein, putative, expressed	1.16388	0.00196469
LOC_Os01g72430.1 protein	NADPH quinone oxidoreductase, putative, expressed	1.50813	2.39e-06
LOC_Os01g72460.1 protein	NADPH quinone oxidoreductase, putative, expressed	1.47596	2.8e-06
LOC_Os01g72520.1 protein	phosphoesterase family protein, putative, expressed	1.41008	2.46e-05
LOC_Os01g72690.1 protein	NAD kinase, putative, expressed	1.58875	4.62e-06
LOC_Os01g72700.1 protein	expressed protein	2.60518	2.06e-06
LOC_Os01g72710.1 protein	expressed protein	1.1965	0.00127163
LOC_Os01g72780.1 protein	expressed protein	1.98996	1.77e-06
LOC_Os01g72790.1 protein	cyclin-dependent kinase, putative, expressed	1.5028	2.92e-05
LOC_Os01g72800.1 protein	signal recognition particle receptor, putative, expressed	0.964851	0.323061
LOC_Os01g72860.1 protein	MAC/Perforin domain containing protein, putative, expressed	1.11466	0.0308848
LOC_Os01g72890.1 protein	transposon protein, putative, CACTA, En/Spm sub-class, expressed	1.29751	0.000597318
LOC_Os01g72940.1 protein	phosphatidylserine decarboxylase, putative, expressed	1.34277	5.52e-05
LOC_Os01g72950.1 protein	expressed protein	0.870261	0.00402193
LOC_Os01g72980.1 protein	tRNA uridine 5-carboxymethylaminomethyl modification enzyme gidA, putative, expressed	1.28847	4.71e-05
LOC_Os01g72990.1 protein	expressed protein	1.08541	0.0540941
LOC_Os01g73000.1 protein	copine, putative, expressed	1.30784	7.6e-05
LOC_Os01g73120.1 protein	expressed protein	1.97621	1.54e-05
LOC_Os01g73140.1 protein	ubiquitin-fold modifier 1 precursor, putative, expressed	1.1419	0.0187845
LOC_Os01g73160.1 protein	40S ribosomal protein S10, putative, expressed	2.49601	3.08e-07
LOC_Os01g73170.1 protein	peroxidase precursor, putative, expressed	2.31267	1.79e-07
LOC_Os01g73200.1 protein	peroxidase precursor, putative, expressed	0.998609	0.978089
LOC_Os01g73230.1 protein	syntaxin 6, putative, expressed	1.31097	0.00131402
LOC_Os01g73234.1 protein	thioredoxin, putative, expressed	0.773581	0.000387578
LOC_Os01g73250.1 protein	abscisic stress-ripening, putative, expressed	1.43606	0.0222628
LOC_Os01g73300.1 protein	VAMP-like protein YKT62, putative, expressed	1.30398	0.000337951
LOC_Os01g73310.1 protein	actin, putative, expressed	1.51929	2.93e-06
LOC_Os01g73420.1 protein	mitochondrial carrier protein, putative, expressed	1.10174	0.301816
LOC_Os01g73450.1 protein	amino acid kinase, putative, expressed	1.41425	0.000548635
LOC_Os01g73470.1 protein	growth inhibition and differentiation-related protein 88, putative, expressed	1.2812	0.000328188
LOC_Os01g73500.1 protein	expressed protein	1.42379	1.06e-05
LOC_Os01g73514.1 protein	5-oxoprolinase, putative, expressed	1.76497	4.52e-07
LOC_Os01g73530.2 protein	ABC transporter, ATP-binding protein, putative, expressed	1.35893	1.58e-05
LOC_Os01g73540.1 protein	YGGT family protein, putative, expressed	1.03389	0.507949
LOC_Os01g73550.1 protein	mitochondrial-processing peptidase subunit alpha, mitochondrial precursor, putative, expressed	1.66566	6.69e-07
LOC_Os01g73560.1 protein	leucine rich repeat domain containing protein, putative, expressed	2.64662	2.52e-07
LOC_Os01g73580.1 protein	glycosyl hydrolases, putative, expressed	1.35307	0.000727771
LOC_Os01g73620.1 protein	expressed protein	1.41991	9.01e-06
LOC_Os01g73670.1 protein	expressed protein	1.81151	1.27e-06
LOC_Os01g73680.1 protein	aspartyl aminopeptidase, putative, expressed	0.741351	2.16e-05
LOC_Os01g73690.1 protein	pentatricopeptide, putative, expressed	0.354077	1.01e-06
LOC_Os01g73780.1 protein	chloroplast outer envelope 24 kD protein, putative, expressed	1.0808	0.0702738
LOC_Os01g73790.1 protein	NAD dependent epimerase/dehydratase family protein, putative, expressed	1.81765	2.68e-07
LOC_Os01g73880.1 protein	eukaryotic translation initiation factor, putative, expressed	2.0506	2.03e-07
LOC_Os01g73900.1 protein	DEAD-box ATP-dependent RNA helicase, putative, expressed	1.61897	2.78e-06
LOC_Os01g73910.1 protein	peptidase, putative, expressed	0.698008	5.04e-05
LOC_Os01g73950.2 protein	PPR repeat containing protein, expressed	1.44178	0.000287338
LOC_Os01g73970.1 protein	lysine ketoglutarate reductase trans-splicing related 1, putative, expressed	1.21314	0.00259406
LOC_Os01g73980.1 protein	xylem cysteine proteinase 2 precursor, putative, expressed	2.46067	2.34e-07
LOC_Os01g73990.1 protein	cytochrome b5-like Heme/Steroid binding domain containing protein, expressed	1.58167	1.12e-06
LOC_Os01g74010.1 protein	cyclase/dehydrase family protein, expressed	0.880641	0.004175
LOC_Os01g74020.1 protein	MYB family transcription factor, putative, expressed	2.16416	9.01e-08
LOC_Os01g74030.1 protein	pumilio-family RNA binding protein, putative, expressed	2.04057	2.33e-05
LOC_Os01g74180.1 protein	adaptin, putative, expressed	1.39068	3.61e-05
LOC_Os01g74190.1 protein	radical SAM enzyme, putative, expressed	2.03392	5.35e-07
LOC_Os01g74280.1 protein	TGD2, putative, expressed	0.963067	0.316213
LOC_Os01g74300.1 protein	metallothionein, putative, expressed	1.364	0.000105096
LOC_Os01g74310.1 protein	expressed protein	1.32696	8.16e-05
LOC_Os01g74470.1 protein	ABC transporter, ATP-binding protein, putative, expressed	1.99483	3.39e-07
LOC_Os01g74520.1 protein	methyltransferase domain containing protein, putative, expressed	1.5531	9.59e-06
LOC_Os01g74580.1 protein	dnaJ homolog subfamily C member, putative, expressed	1.70622	9.59e-07
LOC_Os01g74610.1 protein	zinc finger, C3HC4 type domain containing protein, expressed	1.65808	9.76e-06
LOC_Os01g74650.3 protein	cysteine synthase, mitochondrial precursor, putative, expressed	0.751048	1.76e-05
LOC_Os01g74660.1 protein	dihydroflavonol-4-reductase, putative, expressed	1.22657	0.000356822
LOC_Os02g01010.1 protein	OsPDIL1-4 protein disulfide isomerase PDIL1-4, expressed	2.13212	1.49e-07
LOC_Os02g01030.1 protein	tetratricopeptide repeat domain containing protein, expressed	1.71668	5.52e-07
LOC_Os02g01060.1 protein	harpin-induced protein 1 domain containing protein, expressed	1.47675	0.000479016
LOC_Os02g01070.1 protein	FG-GAP repeat-containing protein, putative, expressed	1.48022	3.63e-05
LOC_Os02g01100.1 protein	transmembrane amino acid transporter protein, putative, expressed	1.9266	5.44e-07
LOC_Os02g01110.1 protein	translation initiation factor IF-3, putative, expressed	2.00592	1.83e-07
LOC_Os02g01150.2 protein	erythronate-4-phosphate dehydrogenase domain containing protein, expressed	0.608451	1.56e-06
LOC_Os02g01150.3 protein	erythronate-4-phosphate dehydrogenase domain containing protein, expressed	0.720443	7.29e-06
LOC_Os02g01170.1 protein	HECT-domain domain containing protein, expressed	1.45326	4.8e-06
LOC_Os02g01210.1 protein	amino acid transporter, putative, expressed	1.1755	0.00330653
LOC_Os02g01230.2 protein	ribosomal protein, putative, expressed	1.97368	5.79e-07
LOC_Os02g01250.1 protein	LSM domain containing protein, expressed	1.9949	8.21e-07
LOC_Os02g01280.1 protein	T-complex protein, putative, expressed	2.37506	7.23e-08
LOC_Os02g01332.1 protein	ribosomal protein L6, putative, expressed	1.22152	0.0011229
LOC_Os02g01340.2 protein	ferredoxin--NADP reductase, chloroplast precursor, putative, expressed	0.507528	2.4e-07
LOC_Os02g01350.1 protein	expressed protein	2.20809	2.73e-07
LOC_Os02g01380.1 protein	expressed protein	2.66659	3.92e-07
LOC_Os02g01440.1 protein	nitric oxide synthase 1, putative, expressed	1.23992	0.000244845
LOC_Os02g01450.1 protein	expressed protein	1.57583	0.000120545
LOC_Os02g01490.1 protein	expressed protein	1.32078	4.12e-05
LOC_Os02g01500.1 protein	2-oxo acid dehydrogenases acyltransferase domain containing protein, expressed	1.55525	1.8e-06
LOC_Os02g01510.1 protein	lactate/malate dehydrogenase, putative, expressed	1.09887	0.0549178
LOC_Os02g01520.1 protein	IQ calmodulin-binding motif family protein, putative, expressed	1.77112	5.54e-07
LOC_Os02g01590.1 protein	glycosyl hydrolases, putative, expressed	1.36604	0.000101847
LOC_Os02g01720.1 protein	transmembrane protein 120A, putative, expressed	1.40777	3.28e-05
LOC_Os02g01740.1 protein	U5 small nuclear ribonucleoprotein 200 kDa helicase, putative, expressed	1.43473	9.04e-06
LOC_Os02g01790.2 protein	expressed protein	1.79696	8.01e-06
LOC_Os02g01870.1 protein	expressed protein	1.52159	6.02e-06
LOC_Os02g01920.1 protein	GHMP kinases ATP-binding protein, putative, expressed	1.55301	3.3e-06
LOC_Os02g01940.1 protein	transcription factor jumonji, putative, expressed	1.57437	7.39e-06
LOC_Os02g01960.1 protein	tetratricopeptide repeat domain containing protein, expressed	1.65024	1.43e-06
LOC_Os02g02000.1 protein	cytochrome P450, putative, expressed	0.441305	1.34e-07
LOC_Os02g02020.1 protein	pentatricopeptide, putative, expressed	1.85769	6.18e-07
LOC_Os02g02130.1 protein	ribosomal protein L37, putative, expressed	2.59636	5.98e-08
LOC_Os02g02270.1 protein	expressed protein	1.54852	4.37e-05
LOC_Os02g02290.1 protein	SNF2 family N-terminal domain containing protein, expressed	1.28068	0.000326267
LOC_Os02g02320.1 protein	OsSCP6 - Putative Serine Carboxypeptidase homologue, expressed	1.60654	2.49e-06
LOC_Os02g02340.1 protein	glycerol-3-phosphate acyltransferase, putative, expressed	1.02915	0.432737
LOC_Os02g02360.1 protein	expressed protein	3.64737	2.82e-08
LOC_Os02g02380.1 protein	suppressor of phythchrome A, putative, expressed	1.30513	0.000497024
LOC_Os02g02390.1 protein	S1 RNA binding domain containing protein, expressed	1.1283	0.0115648
LOC_Os02g02400.1 protein	catalase isozyme A, putative, expressed	1.80866	1.02e-06
LOC_Os02g02410.1 protein	DnaK family protein, putative, expressed	1.72651	5.52e-07
LOC_Os02g02470.1 protein	oxidoreductase, short chain dehydrogenase/reductase family domain containing protein, expressed	1.66754	1.03e-06
LOC_Os02g02500.1 protein	remorin family protein, putative, expressed	1.84189	2.61e-06
LOC_Os02g02510.1 protein	DNA-directed RNA polymerase II subunit RPB4, putative, expressed	1.81348	4.71e-07
LOC_Os02g02520.1 protein	expressed protein	0.607801	6.46e-07
LOC_Os02g02524.1 protein	canopy homolog 2 precursor, putative, expressed	1.14039	0.0149692
LOC_Os02g02550.1 protein	peptidyl-prolyl cis-trans isomerase, FKBP-type, putative, expressed	0.868228	0.00211012
LOC_Os02g02590.1 protein	PPR repeat domain containing protein, putative, expressed	1.31718	0.000623677
LOC_Os02g02620.1 protein	sialyltransferase family domain containing protein, expressed	1.4813	2.43e-05
LOC_Os02g02690.1 protein	expressed protein	2.47396	1.5e-06
LOC_Os02g02700.1 protein	AMP-binding enzyme, putative, expressed	1.59942	1.97e-06
LOC_Os02g02720.5 protein	SNARE domain containing protein, putative, expressed	1.21133	0.020829
LOC_Os02g02810.1 protein	expressed protein	1.42813	6.59e-06
LOC_Os02g02840.1 protein	ras-related protein, putative, expressed	1.20812	0.000939203
LOC_Os02g02850.1 protein	bifunctional protein folD, putative, expressed	1.97576	2.56e-07
LOC_Os02g02860.1 protein	glutamyl-tRNA synthetase, putative, expressed	1.44438	4.87e-06
LOC_Os02g02870.1 protein	glycine-rich protein 2, putative, expressed	1.57392	3.95e-05
LOC_Os02g02880.1 protein	expressed protein	2.21812	1.61e-07
LOC_Os02g02890.1 protein	peptidyl-prolyl cis-trans isomerase, putative, expressed	2.18438	1.74e-07
LOC_Os02g02920.1 protein	HVA22, putative, expressed	2.55459	6.64e-08
LOC_Os02g02960.4 protein	histone deacetylase complex subunit SAP18, putative, expressed	1.95081	2.29e-07
LOC_Os02g02980.1 protein	MATE domain containing protein, expressed	0.9641	0.404289
LOC_Os02g02990.1 protein	translation initiation factor eIF3 subunit, putative, expressed	1.4248	7.63e-05
LOC_Os02g03000.2 protein	division protein, putative, expressed	1.41758	1.54e-05
LOC_Os02g03010.1 protein	expressed protein	0.484249	6.57e-07
LOC_Os02g03040.1 protein	RNA recognition motif containing protein, expressed	1.66099	7.34e-07
LOC_Os02g03050.1 protein	dimethyladenosine transferase, putative, expressed	1.38483	0.000185973
LOC_Os02g03060.1 protein	cyclin-dependent kinase A-2, putative, expressed	0.810602	0.00824909
LOC_Os02g03090.1 protein	expressed protein	1.50667	6.65e-06
LOC_Os02g03100.1 protein	oxidoreductase, aldo/keto reductase family protein, putative, expressed	1.42522	3.52e-06
LOC_Os02g03110.1 protein	CDP-alcohol phosphatidyltransferase, putative, expressed	1.54667	2.53e-05
LOC_Os02g03230.1 protein	membrane related protein CP5, putative, expressed	1.12622	0.0309397
LOC_Os02g03250.1 protein	expressed protein	0.937799	0.128207
LOC_Os02g03260.1 protein	3-isopropylmalate dehydratase large subunit 2, putative, expressed	1.19677	0.00096957
LOC_Os02g03330.1 protein	expressed protein	0.95772	0.226128
LOC_Os02g03340.3 protein	RNA polymerase II transcription factor B subunit 4, putative, expressed	1.62592	3.7e-05
LOC_Os02g03410.1 protein	#NAME?	1.3771	2.05e-05
LOC_Os02g03430.1 protein	expressed protein	1.05532	0.385903
LOC_Os02g03440.1 protein	LSM domain containing protein, expressed	1.52479	1.19e-05
LOC_Os02g03450.1 protein	vesicle transport v-SNARE protein, putative, expressed	1.51394	1.19e-05
LOC_Os02g03460.1 protein	phosphatidate cytidylyltransferase, putative, expressed	1.23233	0.0169081
LOC_Os02g03470.1 protein	tetratricopeptide repeat containing protein, putative, expressed	1.56329	2.6e-06
LOC_Os02g03530.1 protein	PPR repeat domain containing protein, putative, expressed	1.76237	1.75e-06
LOC_Os02g03540.1 protein	phosphoribosyl transferase, putative, expressed	1.6172	1.47e-06
LOC_Os02g03580.3 protein	transcription factor, putative, expressed	1.31553	0.000168594
LOC_Os02g03600.1 protein	dnaJ domain containing protein, expressed	1.65036	2.05e-06
LOC_Os02g03670.1 protein	expressed protein	0.639237	2.52e-06
LOC_Os02g03720.1 protein	expressed protein	0.803577	0.000109342
LOC_Os02g03730.1 protein	SWIB/MDM2 domain containing protein, expressed	1.67642	1.51e-06
LOC_Os02g03740.1 protein	pyridoxal biosynthesis protein PDX2, putative, expressed	0.836892	0.00229112
LOC_Os02g03820.1 protein	expressed protein	1.80262	4.19e-06
LOC_Os02g03840.2 protein	expressed protein	1.18768	0.00794431
LOC_Os02g03850.1 protein	glycosyltransferase, putative, expressed	1.49059	2.7e-05
LOC_Os02g03860.1 protein	mitochondrial ATP synthase precursor, putative, expressed	1.48362	3.98e-06
LOC_Os02g03890.1 protein	nuclear transport factor 2, putative, expressed	2.11114	1.26e-07
LOC_Os02g04040.1 protein	RecF/RecN/SMC N terminal domain containing protein, expressed	1.22944	0.000478099
LOC_Os02g04050.1 protein	chromosome segregation protein, putative, expressed	1.18856	0.00256412
LOC_Os02g04100.1 protein	peptidase, T1 family, putative, expressed	1.92936	3.62e-07
LOC_Os02g04110.1 protein	expressed protein	1.34043	0.000477186
LOC_Os02g04250.1 protein	glycosyltransferase, putative, expressed	1.53145	2.42e-05
LOC_Os02g04260.1 protein	expressed protein	1.51356	2.67e-06
LOC_Os02g04270.1 protein	DNA polymerase V, putative, expressed	2.75526	1.24e-07
LOC_Os02g04320.2 protein	WD domain, G-beta repeat domain containing protein, expressed	1.76056	7.25e-07
LOC_Os02g04325.1 protein	expressed protein	1.52837	4.31e-05
LOC_Os02g04330.2 protein	5-AMP-activated protein kinase beta-1 subunit-related, putative, expressed	1.0748	0.087712
LOC_Os02g04440.2 protein	transducin family protein, putative, expressed	1.19257	0.00190243
LOC_Os02g04450.1 protein	plant-specific domain TIGR01589 family protein, putative, expressed	1.75131	0.000298696
LOC_Os02g04460.1 protein	ribosomal protein L3, putative, expressed	0.82749	0.000748948
LOC_Os02g04480.1 protein	cleavage and polyadenylation specificity factor, putative, expressed	1.41555	5.25e-05
LOC_Os02g04490.1 protein	histone acetyltransferase HAC1, putative, expressed	1.47126	0.00012189
LOC_Os02g04500.1 protein	S-adenosyl-L-methionine-dependent methyltransferase mraW, putative, expressed	1.47356	8.88e-05
LOC_Os02g04510.1 protein	UOS1, putative, expressed	0.948041	0.233044
LOC_Os02g04520.1 protein	AGG2, putative, expressed	1.32748	0.000112264
LOC_Os02g04560.1 protein	marker Xucw84, putative, expressed	2.6518	5.54e-07
LOC_Os02g04650.1 protein	activator of 90 kDa heat shock protein ATPase homolog, putative, expressed	2.13222	3.57e-07
LOC_Os02g04660.1 protein	arginine N-methyltransferase 5, putative, expressed	2.0392	2.73e-07
LOC_Os02g04670.1 protein	glucan endo-1,3-beta-glucosidase precursor, putative, expressed	1.30624	0.00067972
LOC_Os02g04700.1 protein	tRNA synthetases class II domain containing protein, expressed	1.42677	4.79e-06
LOC_Os02g04710.1 protein	cycloartenol synthase, putative, expressed	1.14331	0.0180624
LOC_Os02g04740.1 protein	molybdenum cofactor synthesis protein 2 large subunit, putative, expressed	1.60824	1.53e-06
LOC_Os02g04800.1 protein	AIG2-like family domain containing protein, expressed	1.08276	0.0876355
LOC_Os02g04840.1 protein	GHMP kinases ATP-binding protein, putative, expressed	1.60458	3.98e-06
LOC_Os02g04970.1 protein	expressed protein	1.50516	2.62e-05
LOC_Os02g05030.1 protein	sucrose-phosphatase, putative, expressed	1.02971	0.369198
LOC_Os02g05310.3 protein	splicing factor 3B subunit 1, putative, expressed	1.44552	2.14e-05
LOC_Os02g05330.1 protein	DEAD-box ATP-dependent RNA helicase, putative, expressed	2.18765	1.75e-05
LOC_Os02g05340.1 protein	proteasome/cyclosome repeat containing protein, expressed	1.55946	5.68e-06
LOC_Os02g05370.1 protein	retrotransposon protein, putative, Ty3-gypsy subclass, expressed	2.021	8.75e-07
LOC_Os02g05430.1 protein	expressed protein	1.26764	0.000579152
LOC_Os02g05440.1 protein	expressed protein	1.42686	3.29e-05
LOC_Os02g05470.1 protein	CCT motif family protein, expressed	2.02951	1.15e-06
LOC_Os02g05480.2 protein	#NAME?	1.38319	2.36e-05
LOC_Os02g05490.1 protein	expressed protein	1.46334	9.02e-05
LOC_Os02g05500.1 protein	pyridoxamine 5'-phosphate oxidase family protein, putative, expressed	1.10425	0.0312641
LOC_Os02g05510.1 protein	GATA transcription factor 25, putative, expressed	1.03989	0.343761
LOC_Os02g05630.1 protein	protein phosphatase 2C, putative, expressed	1.27383	9.17e-05
LOC_Os02g05660.1 protein	DEAD-box ATP-dependent RNA helicase 35A, putative, expressed	1.64102	1.12e-06
LOC_Os02g05680.1 protein	apoptosis-inducing factor 2, putative, expressed	1.75334	3.66e-06
LOC_Os02g05810.1 protein	expressed protein	2.40878	9.37e-08
LOC_Os02g05840.1 protein	VIL2 protein, putative, expressed	1.8819	1.54e-06
LOC_Os02g05870.1 protein	expressed protein	1.09069	0.057085
LOC_Os02g05880.1 protein	RNA polymerase Rpb1, domain 2 family protein, expressed	1.34964	0.000393924
LOC_Os02g05890.1 protein	EMB1303, putative, expressed	1.19819	0.000827996
LOC_Os02g06300.1 protein	GTP-binding protein lepA, putative, expressed	0.892608	0.00899262
LOC_Os02g06340.1 protein	EH domain-containing protein 1, putative, expressed	1.78238	8.68e-06
LOC_Os02g06390.1 protein	expressed protein	1.38395	0.00123751
LOC_Os02g06430.1 protein	DUF292 domain containing protein, expressed	1.58616	7.18e-06
LOC_Os02g06480.1 protein	SCO1 protein homolog, mitochondrial precursor, putative, expressed	1.79593	4.37e-07
LOC_Os02g06500.1 protein	DSHCT domain containing protein, expressed	1.6752	2.62e-06
LOC_Os02g06584.2 protein	zinc finger C-x8-C-x5-C-x3-H type family protein, expressed	1.37784	2.63e-05
LOC_Os02g06588.1 protein	ATP binding protein, putative, expressed	1.13209	0.0280285
LOC_Os02g06592.1 protein	SNF2 family N-terminal domain containing protein, expressed	1.27866	0.000709861
LOC_Os02g06630.1 protein	peroxidase precursor, putative, expressed	1.40206	0.00010228
LOC_Os02g06650.1 protein	COX VIIa, putative, expressed	0.953852	0.297589
LOC_Os02g06690.1 protein	plastocyanin-like domain containing protein, putative, expressed	1.40016	3.05e-05
LOC_Os02g06720.1 protein	WD domain containing protein, putative, expressed	1.54767	1.1e-06
LOC_Os02g06890.1 protein	OTU-like cysteine protease family protein, putative, expressed	1.69258	5.89e-07
LOC_Os02g06920.2 protein	zinc finger, C3HC4 type, domain containing protein, expressed	1.52336	4.98e-06
LOC_Os02g07040.1 protein	biotin--protein ligase, putative, expressed	1.59115	0.000368742
LOC_Os02g07044.1 protein	rhodanese-like domain containing protein, putative, expressed	1.2204	0.000786816
LOC_Os02g07070.1 protein	RNA recognition motif family protein, expressed	1.56933	2.14e-05
LOC_Os02g07120.1 protein	HEAT repeat family protein, putative, expressed	1.74996	7.25e-07
LOC_Os02g07160.1 protein	glyoxalase family protein, putative, expressed	1.66829	7.84e-07
LOC_Os02g07220.1 protein	peptidyl-prolyl cis-trans isomerase, FKBP-type, putative, expressed	1.29188	3.56e-05
LOC_Os02g07230.1 protein	porphobilinogen deaminase, chloroplast precursor, putative, expressed	1.31709	6.29e-05
LOC_Os02g07240.1 protein	expressed protein	2.29852	3.43e-07
LOC_Os02g07250.1 protein	peptidase, cysteine peptidase active site, putative, expressed	0.813726	0.000604786
LOC_Os02g07260.1 protein	phosphoglycerate kinase protein, putative, expressed	2.14635	9.22e-08
LOC_Os02g07350.1 protein	inositol-1-monophosphatase, putative, expressed	0.650599	2.26e-06
LOC_Os02g07410.1 protein	glycine cleavage system H protein, putative, expressed	1.4517	6.4e-05
LOC_Os02g07420.1 protein	splicing factor, arginine/serine-rich 12, putative, expressed	1.79033	3.63e-05
LOC_Os02g07450.2 protein	core histone H2A/H2B/H3/H4, putative, expressed	1.96563	1.7e-07
LOC_Os02g07490.1 protein	glyceraldehyde-3-phosphate dehydrogenase, putative, expressed	2.89206	7.23e-08
LOC_Os02g07680.1 protein	cytochrome P450, putative, expressed	0.682649	2.49e-05
LOC_Os02g07720.2 protein	cytidylyltransferase domain containing protein, expressed	1.19056	0.00120103
LOC_Os02g07740.1 protein	RNA binding protein, putative, expressed	1.64187	8.38e-06
LOC_Os02g07760.2 protein	aldehyde dehydrogenase, putative, expressed	1.55366	9.32e-07
LOC_Os02g07790.1 protein	serine/threonine-protein kinase HT1, putative, expressed	1.28047	0.000107093
LOC_Os02g07870.1 protein	ATP synthase, putative, expressed	1.74641	7.93e-07
LOC_Os02g07890.2 protein	60S ribosomal protein L27a-3, putative, expressed	1.33646	0.000133291
LOC_Os02g07910.1 protein	fiber protein Fb15, putative, expressed	1.45645	5.53e-05
LOC_Os02g07920.1 protein	expressed protein	1.50716	3.66e-05
LOC_Os02g07960.4 protein	STRUBBELIG-RECEPTOR FAMILY 3 precursor, putative, expressed	1.54259	9.15e-06
LOC_Os02g07980.1 protein	expressed protein	1.53555	4.1e-06
LOC_Os02g08010.1 protein	LTPL43 - Protease inhibitor/seed storage/LTP family protein precursor, putative, expressed	1.61294	7.27e-06
LOC_Os02g08018.1 protein	calcium-transporting ATPase 9, plasma membrane-type, putative, expressed	1.38406	0.000175861
LOC_Os02g08100.1 protein	AMP-binding domain containing protein, expressed	0.972467	0.516273
LOC_Os02g08120.1 protein	calmodulin binding protein, putative, expressed	1.15514	0.00597644
LOC_Os02g08130.1 protein	FGGY family of carbohydrate kinases, putative, expressed	1.1107	0.0270931
LOC_Os02g08190.1 protein	CYPRO4, putative, expressed	1.77128	8.37e-06
LOC_Os02g08260.1 protein	HD domain containing protein 2, putative, expressed	1.09924	0.0708798
LOC_Os02g08300.1 protein	RAD23 DNA repair protein, putative, expressed	1.96731	3.74e-07
LOC_Os02g08350.1 protein	expressed protein	2.06231	3.69e-06
LOC_Os02g08360.1 protein	RNA recognition motif, putative, expressed	1.70565	2.36e-06
LOC_Os02g08364.1 protein	protein phosphatase 2C, putative, expressed	1.65325	1.48e-05
LOC_Os02g08370.1 protein	ubiquitin carboxyl-terminal hydrolase, family 1, putative, expressed	1.56506	3.41e-06
LOC_Os02g08380.1 protein	CR084 protein, putative, expressed	1.35733	0.000108039
LOC_Os02g08410.1 protein	chorismate mutase, chloroplast precursor, putative, expressed	1.68282	9.91e-07
LOC_Os02g08420.1 protein	cinnamoyl CoA reductase, putative, expressed	1.08229	0.0298333
LOC_Os02g08480.1 protein	ubiquitin fusion degradation protein, putative, expressed	1.54837	5.36e-06
LOC_Os02g08490.1 protein	chaperone protein clpB 1, putative, expressed	1.809	1.4e-06
LOC_Os02g08500.1 protein	two-component response regulator, putative, expressed	1.13261	0.0597586
LOC_Os02g08544.1 protein	homeobox protein knotted-1, putative, expressed	1.60646	5.39e-06
LOC_Os02g09060.1 protein	BRCA1-associated protein, putative, expressed	1.31763	4.77e-05
LOC_Os02g09150.1 protein	inorganic H+ pyrophosphatase, putative, expressed	1.0307	0.498383
LOC_Os02g09170.1 protein	sucrose-phosphate synthase, putative, expressed	1.85007	1.06e-06
LOC_Os02g09250.1 protein	cytochrome P450 71D10, putative, expressed	1.35511	0.000266445
LOC_Os02g09340.1 protein	expressed protein	0.604227	1.05e-06
LOC_Os02g09359.1 protein	BRASSINOSTEROID INSENSITIVE 1-associated receptor kinase 1 precursor, putative, expressed	1.99113	4.3e-07
LOC_Os02g09380.1 protein	expressed protein	4.62852	1.7e-07
LOC_Os02g09420.1 protein	cyclase family protein, putative, expressed	1.98745	6.85e-07
LOC_Os02g09460.1 protein	GA16396-PA, putative, expressed	1.3118	4.1e-05
LOC_Os02g09490.1 protein	dehydrogenase, putative, expressed	1.08525	0.0829885
LOC_Os02g09510.1 protein	limonoid UDP-glucosyltransferase, putative, expressed	1.2792	0.000231031
LOC_Os02g09590.1 protein	ribosome, putative, expressed	0.735329	5.49e-05
LOC_Os02g09600.2 protein	expressed protein	1.43272	0.000117252
LOC_Os02g09720.1 protein	multidrug resistance protein, putative, expressed	0.91258	0.0384581
LOC_Os02g09740.1 protein	STRUBBELIG-RECEPTOR FAMILY 7 precursor, putative, expressed	2.14287	1.3e-07
LOC_Os02g09750.1 protein	lycopene beta cyclase, chloroplast precursor, putative, expressed	0.777504	0.00136636
LOC_Os02g09780.1 protein	phytoene dehydrogenase-like, putative, expressed	1.61871	9.85e-05
LOC_Os02g09890.1 protein	protein kinase PKN/PRK1, effector, putative, expressed	1.48891	3.77e-06
LOC_Os02g09900.1 protein	transposon protein, putative, unclassified, expressed	1.58687	1.61e-05
LOC_Os02g09920.1 protein	PHD-finger domain containing protein, putative, expressed	1.21463	0.0327412
LOC_Os02g09940.1 protein	peroxiredoxin, putative, expressed	0.641427	6.08e-06
LOC_Os02g10010.1 protein	expressed protein	1.4045	2.16e-05
LOC_Os02g10050.1 protein	expressed protein	1.45367	1.6e-05
LOC_Os02g10060.1 protein	SWIRM domain containing protein, expressed	1.85741	1.15e-06
LOC_Os02g10070.2 protein	citrate synthase, putative, expressed	1.57292	2.38e-06
LOC_Os02g10080.1 protein	zinc finger C-x8-C-x5-C-x3-H type family protein, expressed	2.04088	2.36e-07
LOC_Os02g10120.1 protein	lipoxygenase, putative, expressed	0.235045	2.82e-08
LOC_Os02g10130.1 protein	tubulin binding cofactor C, putative, expressed	1.44632	6.8e-06
LOC_Os02g10170.1 protein	expressed protein	0.998365	0.974886
LOC_Os02g10180.1 protein	dnaJ homolog subfamily C member, putative, expressed	1.62042	1.47e-06
LOC_Os02g10190.1 protein	DUF1680 domain containing protein, putative, expressed	1.9544	2.17e-07
LOC_Os02g10220.1 protein	heat shock protein DnaJ, putative, expressed	1.90975	6.14e-07
LOC_Os02g10230.1 protein	metal cation transporter, putative, expressed	1.9773	3.06e-07
LOC_Os02g10260.1 protein	outer membrane protein, OMP85 family protein, expressed	1.40441	5.58e-06
LOC_Os02g10290.1 protein	copper-transporting ATPase, putative, expressed	1.62693	1.42e-06
LOC_Os02g10310.1 protein	fumarylacetoacetase, putative, expressed	1.48232	2.52e-06
LOC_Os02g10350.1 protein	MLO domain containing protein, putative, expressed	0.778789	0.000143132
LOC_Os02g10380.1 protein	Regulator of chromosome condensation domain containing protein, expressed	1.81878	3.48e-06
LOC_Os02g10390.1 protein	chlorophyll A-B binding protein, putative, expressed	0.40229	9.3e-08
LOC_Os02g10480.1 protein	stromal membrane-associated protein, putative, expressed	2.02728	1.55e-07
LOC_Os02g10500.1 protein	expressed protein	1.46431	3.74e-05
LOC_Os02g10510.1 protein	Ubiquitin family domain containing protein, expressed	1.67587	4.85e-07
LOC_Os02g10520.1 protein	OsSub12 - Putative Subtilisin homologue, expressed	1.78353	5.91e-07
LOC_Os02g10540.1 protein	ribosomal protein L7/L12 C-terminal domain containing protein, expressed	1.74513	3.94e-07
LOC_Os02g10590.1 protein	peptidyl-prolyl cis-trans isomerase, FKBP-type, putative, expressed	1.08668	0.128893
LOC_Os02g10640.1 protein	26S protease regulatory subunit, putative, expressed	1.69262	7.2e-07
LOC_Os02g10660.1 protein	glycosyl hydrolases family 17, putative, expressed	1.14635	0.0293044
LOC_Os02g10690.1 protein	targeting protein for Xklp2, putative, expressed	1.46458	0.000155072
LOC_Os02g10790.1 protein	expressed protein	1.32556	0.000540546
LOC_Os02g10794.1 protein	expressed protein	1.54025	5.33e-06
LOC_Os02g10810.1 protein	protein of unknown function domain containing protein, expressed	1.85052	5.08e-07
LOC_Os02g10820.1 protein	Sel1 repeat domain containing protein, putative, expressed	1.84525	2.02e-06
LOC_Os02g10860.1 protein	bZIP transcription factor domain containing protein, expressed	1.88763	1.61e-06
LOC_Os02g10880.1 protein	UDP-glucoronosyl and UDP-glucosyl transferase domain containing protein, expressed	2.1345	1.27e-06
LOC_Os02g10920.5 protein	zinc finger family protein, putative, expressed	1.76003	3.26e-06
LOC_Os02g10940.1 protein	tetratricopeptide repeat domain containing protein, expressed	1.35212	4.61e-05
LOC_Os02g10970.1 protein	peptidyl-prolyl cis-trans isomerase, putative, expressed	1.79668	5.94e-07
LOC_Os02g11030.1 protein	50S ribosomal protein L19, chloroplast precursor, putative, expressed	1.9369	6.12e-07
LOC_Os02g11050.1 protein	26S protease regulatory subunit, putative, expressed	1.94839	3.59e-07
LOC_Os02g11060.1 protein	WD domain, G-beta repeat domain containing protein, expressed	1.44401	0.000101067
LOC_Os02g11110.1 protein	flavonol-3-O-glycoside-7-O-glucosyltransferase 1, putative, expressed	1.22761	0.00536666
LOC_Os02g11640.1 protein	UDP-glucoronosyl and UDP-glucosyl transferase, putative, expressed	1.36207	9.07e-05
LOC_Os02g11700.1 protein	cytokinin-O-glucosyltransferase 3, putative, expressed	1.27029	0.00012327
LOC_Os02g11720.1 protein	lipase, putative, expressed	1.79874	2.26e-05
LOC_Os02g11740.1 protein	plastidic ATP/ADP-transporter, putative, expressed	1.62414	9.22e-07
LOC_Os02g11750.1 protein	RNA recognition motif containing protein, putative, expressed	1.33918	8.25e-05
LOC_Os02g11780.1 protein	transcription factor S-II, central domain containing protein, expressed	1.94791	5.26e-07
LOC_Os02g11820.1 protein	GTPase-activating protein, putative, expressed	1.40348	4.23e-06
LOC_Os02g11830.2 protein	coatomer subunit beta, putative, expressed	1.6174	1.82e-06
LOC_Os02g11840.1 protein	coatomer subunit beta-2, putative, expressed	1.83532	0.000152183
LOC_Os02g12570.1 protein	pre-mRNA cleavage complex II protein Clp1, putative, expressed	1.10584	0.0161286
LOC_Os02g12580.1 protein	OsPP2Ac-3 - Phosphatase 2A isoform 3 belonging to family 1, expressed	1.34512	6.56e-05
LOC_Os02g12650.1 protein	puromycin-sensitive aminopeptidase, putative, expressed	1.635	2.69e-06
LOC_Os02g12740.1 protein	GPI-anchor transamidase precursor, putative, expressed	1.79404	5.11e-07
LOC_Os02g12750.1 protein	tetraspanin family protein, putative, expressed	1.06189	0.153535
LOC_Os02g12760.1 protein	integral membrane protein, putative, expressed	1.18273	0.00913109
LOC_Os02g12794.3 protein	elongation factor 1-gamma, putative, expressed	1.69306	0.00864156
LOC_Os02g12800.2 protein	elongation factor 1-gamma, putative, expressed	2.33046	1.17e-07
LOC_Os02g12850.1 protein	RNA recognition motif containing protein, expressed	1.99711	2.11e-07
LOC_Os02g12880.1 protein	calcium-binding EF hand family protein, putative, expressed	1.2378	0.000107355
LOC_Os02g13060.1 protein	expressed protein	1.45837	0.000107268
LOC_Os02g13130.1 protein	KH domain-containing protein, putative, expressed	1.73691	1.7e-06
LOC_Os02g13140.1 protein	xaa-Pro dipeptidase, putative, expressed	1.63457	4.56e-06
LOC_Os02g13170.1 protein	mitochondrial carrier protein, putative, expressed	0.999922	0.998866
LOC_Os02g13270.1 protein	Mpv17 / PMP22 family domain containing protein, expressed	1.18711	0.0110581
LOC_Os02g13330.1 protein	bet v I allergen family protein, putative, expressed	1.42401	0.000565972
LOC_Os02g13360.1 protein	expressed protein	0.760874	0.0135235
LOC_Os02g13510.1 protein	receptor-like protein kinase 5 precursor, putative, expressed	1.36502	8e-05
LOC_Os02g13560.3 protein	transporter family protein, putative, expressed	1.24778	0.00184041
LOC_Os02g13640.1 protein	protein phosphatase 1 regulatory subunit SDS22, putative, expressed	1.49606	6.33e-06
LOC_Os02g13840.1 protein	citrate synthase, putative, expressed	1.43577	1.79e-05
LOC_Os02g13850.1 protein	leucine-rich repeat-containing protein kinase family protein, putative, expressed	1.37246	0.000648655
LOC_Os02g13900.1 protein	BES1/BZR1 homolog protein, putative, expressed	1.35215	0.00636723
LOC_Os02g13970.2 protein	Complex I intermediate-associated protein 30 domain containing protein, putative, expressed	0.661333	1.67e-06
LOC_Os02g13990.1 protein	U2 small nuclear ribonucleoprotein A, putative, expressed	1.29401	3.55e-05
LOC_Os02g14000.2 protein	actin-related protein 2/3 complex subunit 3, putative, expressed	1.63545	0.000333963
LOC_Os02g14059.1 protein	ribosomal protein L5, putative, expressed	1.62522	1.55e-06
LOC_Os02g14090.1 protein	berberine and berberine like domain containing protein, expressed	1.40518	0.000132144
LOC_Os02g14110.1 protein	aminotransferase, classes I and II, domain containing protein, expressed	1.59421	1.78e-06
LOC_Os02g14160.1 protein	peroxidase precursor, putative, expressed	1.08945	0.130457
LOC_Os02g14170.1 protein	peroxidase precursor, putative, expressed	1.27173	8.08e-05
LOC_Os02g14430.1 protein	peroxidase precursor, putative, expressed	1.10966	0.273068
LOC_Os02g14440.1 protein	peroxidase precursor, putative, expressed	0.113678	2.82e-08
LOC_Os02g14530.1 protein	protein kinase domain containing protein, expressed	1.33454	0.0095114
LOC_Os02g14680.1 protein	UDP-glucoronosyl and UDP-glucosyl transferase domain containing protein, expressed	1.37047	4.77e-05
LOC_Os02g14760.1 protein	CID11, putative, expressed	2.6776	2.24e-07
LOC_Os02g14770.1 protein	phosphoenolpyruvate carboxylase, putative, expressed	1.45851	1.82e-05
LOC_Os02g14780.2 protein	splicing factor 3 subunit 1, putative, expressed	1.39806	1.05e-05
LOC_Os02g14790.1 protein	WD domain, G-beta repeat domain containing protein, expressed	1.3543	0.000131094
LOC_Os02g14860.1 protein	prefoldin subunit, putative, expressed	1.92327	2.57e-07
LOC_Os02g14929.1 protein	T-complex protein, putative, expressed	2.76444	5.85e-08
LOC_Os02g14980.1 protein	calcium-binding EF hand family protein, putative, expressed	1.72395	7.86e-07
LOC_Os02g15169.1 protein	glutelin, putative, expressed	0.454485	0.191889
LOC_Os02g15220.2 protein	bromodomain containing protein, expressed	1.59983	1.08e-05
LOC_Os02g15230.1 protein	GDSL-like lipase/acylhydrolase, putative, expressed	1.52753	3.24e-06
LOC_Os02g15270.1 protein	tyrosine-protein phosphatase YVH1, putative, expressed	4.16325	3.03e-08
LOC_Os02g15310.1 protein	RNA recognition motif containing protein, expressed	1.44828	4.39e-06
LOC_Os02g15550.2 protein	spermidine synthase, putative, expressed	1.83142	3.12e-07
LOC_Os02g15594.1 protein	protein phosphatase 2C, putative, expressed	1.32564	0.000329543
LOC_Os02g15610.1 protein	40S ribosomal protein S15a, putative, expressed	1.44645	4.4e-05
LOC_Os02g15640.1 protein	CAPIP1, putative, expressed	0.902326	0.0146207
LOC_Os02g15660.1 protein	tetratricopeptide repeat, putative, expressed	1.30548	3.78e-05
LOC_Os02g15750.1 protein	expressed protein	0.590112	3.61e-06
LOC_Os02g15860.1 protein	expressed protein	1.67298	0.000134156
LOC_Os02g15900.1 protein	50S ribosomal protein L21, chloroplast precursor, putative, expressed	0.759524	0.00013714
LOC_Os02g15970.3 protein	alpha-hemolysin, putative, expressed	0.707538	1.61e-05
LOC_Os02g16550.1 protein	Ser/Thr protein phosphatase family protein, putative, expressed	1.8486	2.15e-07
LOC_Os02g16620.1 protein	reticulon domain containing protein, putative, expressed	1.48908	0.000100561
LOC_Os02g16630.1 protein	tryptophan biosynthesis protein trpCF, putative, expressed	1.18976	0.00409873
LOC_Os02g16709.1 protein	peptidase, putative, expressed	1.20387	0.000895377
LOC_Os02g16820.1 protein	glutelin, putative, expressed	0.558809	0.174791
LOC_Os02g17330.1 protein	aminotransferase domain containing protein, putative, expressed	0.825569	0.00213486
LOC_Os02g17350.2 protein	VHS and GAT domain containing protein, expressed	1.26835	0.000179734
LOC_Os02g17360.1 protein	PPR repeat domain containing protein, putative, expressed	1.52017	2.6e-05
LOC_Os02g17390.1 protein	3-hydroxyacyl-CoA dehydrogenase, putative, expressed	1.69586	8.84e-07
LOC_Os02g17470.1 protein	RNA-binding protein-related, putative, expressed	1.83411	7.41e-07
LOC_Os02g17500.2 protein	transporter family protein, putative, expressed	1.52853	4.68e-05
LOC_Os02g17520.1 protein	cytochrome c-type biogenesis protein ccmH precursor, putative, expressed	2.03082	7.25e-07
LOC_Os02g17640.1 protein	isochorismatase family protein, putative, expressed	1.489	6.05e-06
LOC_Os02g17650.1 protein	tocopherol cyclase, chloroplast precursor, putative, expressed	1.15451	0.00138385
LOC_Os02g17700.1 protein	pyridine nucleotide-disulphide oxidoreductase domain containing protein, expressed	1.48119	5.25e-06
LOC_Os02g17870.1 protein	microfibrillar-associated protein 1, putative, expressed	1.55593	1.73e-06
LOC_Os02g17910.1 protein	- CK1 includes the casein kinase 1 kinases, expressed	1.47225	1.83e-05
LOC_Os02g17920.1 protein	glyoxalase family protein, putative, expressed	0.467508	1.39e-07
LOC_Os02g17940.2 protein	leucoanthocyanidin dioxygenase, putative, expressed	1.34126	2.21e-05
LOC_Os02g17970.1 protein	#NAME?	1.16337	0.00400968
LOC_Os02g17990.1 protein	Leucine Rich Repeat family protein, expressed	1.11101	0.0428421
LOC_Os02g18090.1 protein	expressed protein	1.951	2.14e-07
LOC_Os02g18320.1 protein	BRASSINOSTEROID INSENSITIVE 1-associated receptor kinase 1 precursor, putative, expressed	1.32965	0.000176467
LOC_Os02g18380.1 protein	60S ribosomal protein L27-3, putative, expressed	2.64768	2.15e-07
LOC_Os02g18410.1 protein	salt stress root protein RS1, putative, expressed	2.25898	4.74e-07
LOC_Os02g18450.1 protein	GTP-binding protein typA/bipA, putative, expressed	1.20586	0.000259229
LOC_Os02g18550.1 protein	40S ribosomal protein S3a, putative, expressed	1.7598	7.45e-07
LOC_Os02g18660.1 protein	expressed protein	2.27749	1.55e-07
LOC_Os02g18820.1 protein	WD domain, G-beta repeat domain containing protein, expressed	1.93705	1.07e-06
LOC_Os02g18830.1 protein	ribosome biogenesis protein NEP1, putative, expressed	2.34784	7.97e-08
LOC_Os02g18850.1 protein	OsPOP5 - Putative Prolyl Oligopeptidase homologue, expressed	1.65242	2.06e-06
LOC_Os02g18940.1 protein	expressed protein	1.87263	3.22e-05
LOC_Os02g19150.1 protein	AAA family ATPase, putative, expressed	1.03598	0.352881
LOC_Os02g19170.1 protein	expressed protein	1.64668	7.12e-07
LOC_Os02g19210.1 protein	WD repeat-containing protein, putative, expressed	1.59432	2.88e-06
LOC_Os02g19220.2 protein	expressed protein	1.58644	4.96e-06
LOC_Os02g19330.2 protein	expressed protein	1.3707	0.000611491
LOC_Os02g19440.1 protein	sirohydrochlorin ferrochelatase, putative, expressed	1.38023	1.17e-05
LOC_Os02g19770.1 protein	eukaryotic translation initiation factor 1A, putative, expressed	3.04095	9.13e-08
LOC_Os02g19804.1 protein	Zinc finger C-x8-C-x5-C-x3-H type domain containing protein, expressed	1.76476	5.35e-07
LOC_Os02g19820.1 protein	nodulin MtN3 family protein, putative, expressed	1.55125	2.73e-05
LOC_Os02g19860.1 protein	pre-mRNA-splicing factor ATP-dependent RNA helicase, putative, expressed	1.355	6.67e-05
LOC_Os02g19924.1 protein	aminotransferase, classes I and II, domain containing protein, expressed	1.71927	3.54e-07
LOC_Os02g19970.1 protein	aminotransferase, classes I and II, domain containing protein, expressed	1.23283	0.000615982
LOC_Os02g20170.1 protein	drought induced 19 protein, putative, expressed	1.70342	0.000101606
LOC_Os02g20270.1 protein	expressed protein	2.26939	1.55e-07
LOC_Os02g20310.1 protein	expressed protein	1.16638	0.00767302
LOC_Os02g20330.1 protein	expressed protein	2.13984	1.86e-07
LOC_Os02g20394.1 protein	dnaJ domain containing protein, expressed	2.15408	2.42e-07
LOC_Os02g20410.1 protein	GTP binding protein, putative, expressed	1.34224	4.34e-05
LOC_Os02g20490.1 protein	expressed protein	0.765423	0.000210094
LOC_Os02g20540.1 protein	fasciclin domain containing protein, expressed	4.05004	6.05e-08
LOC_Os02g20844.1 protein	expressed protein	1.89254	3.18e-07
LOC_Os02g20930.1 protein	apoptosis inhibitor 5, putative, expressed	1.73907	2.82e-06
LOC_Os02g20940.1 protein	CHCH domain containing protein, expressed	1.31267	0.000942652
LOC_Os02g21110.1 protein	OsFBK6 - F-box domain and kelch repeat containing protein, expressed	1.23035	0.000502332
LOC_Os02g21185.1 protein	expressed protein	0.584797	9.99e-07
LOC_Os02g21250.2 protein	clathrin adaptor complex small chain domain containing protein, expressed	1.1321	0.0194505
LOC_Os02g21280.1 protein	POEI30 - Pollen Ole e I allergen and extensin family protein precursor, expressed	2.51951	6.97e-07
LOC_Os02g21430.1 protein	AML1, putative, expressed	1.28187	0.014686
LOC_Os02g21460.1 protein	uncharacterized protein yqjG, putative, expressed	1.90348	2.24e-07
LOC_Os02g21520.1 protein	chalcone isomerase 3, putative, expressed	0.967927	0.401038
LOC_Os02g21630.1 protein	SEC14 cytosolic factor family protein, putative, expressed	0.917608	0.0315676
LOC_Os02g21650.1 protein	prefoldin, putative, expressed	1.62373	1.55e-06
LOC_Os02g21660.1 protein	L1P family of ribosomal proteins domain containing protein, expressed	2.25816	3.55e-07
LOC_Os02g21970.1 protein	26S protease regulatory subunit 6B, putative, expressed	1.79006	2.74e-07
LOC_Os02g22060.1 protein	expressed protein	0.879754	0.0231451
LOC_Os02g22070.1 protein	expressed protein	1.69703	8.87e-06
LOC_Os02g22090.1 protein	pattern formation protein EMB30, putative, expressed	1.87387	1.42e-06
LOC_Os02g22190.1 protein	glycosyltransferase, putative, expressed	1.92561	9.98e-05
LOC_Os02g22260.1 protein	fruit protein PKIWI502, putative, expressed	0.695696	7.7e-05
LOC_Os02g22370.1 protein	expressed protein	1.76063	1.27e-06
LOC_Os02g22380.1 protein	glycosyltransferase protein, putative, expressed	1.39802	2.16e-05
LOC_Os02g22780.1 protein	T-complex protein, putative, expressed	1.65322	0.000100066
LOC_Os02g24020.1 protein	dihydrodipicolinate reductase, putative, expressed	1.5402	1.75e-06
LOC_Os02g24080.4 protein	SNARE domain containing protein, putative, expressed	1.33754	4.26e-05
LOC_Os02g24134.1 protein	Sec1 family transport protein, putative, expressed	1.74126	2.23e-06
LOC_Os02g24330.1 protein	eukaryotic translation initiation factor 4B, putative, expressed	3.7731	1.6e-07
LOC_Os02g24354.1 protein	pyridoxal-dependent decarboxylase protein, putative, expressed	1.23888	0.000241823
LOC_Os02g24550.1 protein	retrotransposon protein, putative, unclassified, expressed	2.52669	9.47e-05
LOC_Os02g24604.1 protein	photosystem I assembly protein ycf4, putative, expressed	1.16895	0.019331
LOC_Os02g24614.1 protein	DNA-directed RNA polymerase subunit beta, putative, expressed	1.24742	0.000306244
LOC_Os02g24634.1 protein	photosystem II D2 protein, putative, expressed	0.493618	3.28e-07
LOC_Os02g25060.1 protein	NTMC2Type1.2 protein, putative, expressed	1.48413	6.12e-06
LOC_Os02g25230.1 protein	expressed protein	0.995409	0.908604
LOC_Os02g25580.1 protein	Sec1 family transport protein, putative, expressed	1.41388	3.6e-05
LOC_Os02g25840.1 protein	conserved oligomeric Golgi complex component 4, related, putative, expressed	1.39873	8.56e-05
LOC_Os02g25870.1 protein	elongation factor Tu, putative, expressed	1.77289	6.02e-07
LOC_Os02g26210.1 protein	flowering promoting factor-like 1, putative, expressed	1.68224	1.28e-05
LOC_Os02g26349.2 protein	transposon protein, putative, CACTA, En/Spm sub-class, expressed	1.42099	0.000322488
LOC_Os02g26370.1 protein	wiskott-Aldrich syndrome protein family member 2, putative, expressed	1.42079	0.000341802
LOC_Os02g26440.1 protein	prefoldin subunit, putative, expressed	1.66646	1.62e-05
LOC_Os02g26650.3 protein	delta14-sterol reductase, putative, expressed	1.94031	5.44e-07
LOC_Os02g26660.2 protein	exonuclease, putative, expressed	1.60891	2.81e-05
LOC_Os02g26700.1 protein	cation transport regulator-like protein 1, putative, expressed	2.00946	2.41e-07
LOC_Os02g26850.1 protein	rRNA-processing protein FCF, putative, expressed	2.91288	1.65e-07
LOC_Os02g26960.1 protein	expressed protein	2.86607	2.74e-07
LOC_Os02g26984.1 protein	expressed protein	1.40571	5.44e-05
LOC_Os02g27030.1 protein	cysteine proteinase 1 precursor, putative, expressed	1.80672	3.47e-06
LOC_Os02g27060.1 protein	high mobility group, putative, expressed	0.875943	0.0050302
LOC_Os02g27070.2 protein	PPR repeat domain containing protein, putative, expressed	0.968722	0.444765
LOC_Os02g27110.1 protein	expressed protein	1.35284	0.0008295
LOC_Os02g27220.1 protein	protein phosphatase 2C, putative, expressed	1.01662	0.742242
LOC_Os02g27360.1 protein	aspartic proteinase-like protein 2 precursor, putative, expressed	1.25739	0.000315759
LOC_Os02g27470.1 protein	importin-7, putative, expressed	1.72771	1.98e-06
LOC_Os02g27480.1 protein	membrane attack complex component/perforin/complement C9, putative, expressed	1.5836	1.21e-05
LOC_Os02g27490.1 protein	bile acid sodium symporter family protein, putative, expressed	1.13064	0.190912
LOC_Os02g27740.1 protein	expressed protein	2.23091	2.86e-07
LOC_Os02g27760.1 protein	40S ribosomal protein S15a, putative, expressed	2.31056	1.16e-07
LOC_Os02g27950.1 protein	ataxin-2 related protein, putative, expressed	1.7312	1.17e-06
LOC_Os02g27960.1 protein	expressed protein	2.00143	2.24e-07
LOC_Os02g28170.1 protein	transferase family protein, putative, expressed	2.46383	8.67e-06
LOC_Os02g28810.1 protein	ribosomal protein, putative, expressed	1.90964	2.48e-06
LOC_Os02g28820.1 protein	expressed protein	1.66389	3.55e-06
LOC_Os02g28900.1 protein	cytokinin-O-glucosyltransferase 2, putative, expressed	1.3876	0.0104922
LOC_Os02g28980.1 protein	peptidyl-prolyl isomerase, putative, expressed	1.36914	0.00461323
LOC_Os02g29220.1 protein	expressed protein	1.54842	6.48e-06
LOC_Os02g29320.1 protein	expressed protein	1.99222	8.2e-07
LOC_Os02g29400.1 protein	expressed protein	1.70414	9.37e-06
LOC_Os02g29464.1 protein	RecF/RecN/SMC N terminal domain containing protein, expressed	1.58342	1.39e-05
LOC_Os02g29480.1 protein	RNA-binding protein-like, putative, expressed	1.75144	3e-07
LOC_Os02g29550.2 protein	AP2 domain containing protein, expressed	1.09365	0.0222506
LOC_Os02g29890.1 protein	expressed protein	1.87326	2.69e-07
LOC_Os02g29960.1 protein	cytochrome P450, putative, expressed	1.2144	0.00228342
LOC_Os02g30050.1 protein	ribosomal protein L29, putative, expressed	2.06246	2.29e-07
LOC_Os02g30140.2 protein	expressed protein	1.81116	6.56e-07
LOC_Os02g30180.1 protein	ZOS2-07 - C2H2 zinc finger protein, expressed	0.943189	0.0954097
LOC_Os02g30230.1 protein	exo70 exocyst complex subunit domain containing protein, expressed	1.92663	8.78e-07
LOC_Os02g30290.1 protein	transposon protein, putative, unclassified, expressed	2.01988	4.1e-05
LOC_Os02g30310.1 protein	ThiF family domain containing protein, putative, expressed	1.78622	2.02e-06
LOC_Os02g30320.1 protein	drought-induced protein 1, putative, expressed	0.987951	0.751727
LOC_Os02g30410.2 protein	expressed protein	1.14225	0.00296078
LOC_Os02g30460.1 protein	uncharacterized protein MJ0304, putative, expressed	1.67125	1.24e-06
LOC_Os02g30620.2 protein	dnaJ domain containing protein, expressed	1.43988	4.83e-06
LOC_Os02g30624.1 protein	LSM domain containing protein, expressed	2.23995	4.55e-07
LOC_Os02g30630.2 protein	thiamine pyrophosphate enzyme, C-terminal TPP binding domain containing protein, expressed	1.77481	2.52e-07
LOC_Os02g30650.1 protein	heavy metal-associated domain containing protein, expressed	2.71893	2.16e-07
LOC_Os02g30730.2 protein	SART-1 family protein, putative, expressed	1.70939	1.18e-06
LOC_Os02g30800.1 protein	POLE1 - Putative DNA polymerase epsilon catalytic subunit, expressed	0.765225	0.141067
LOC_Os02g30840.1 protein	RNA pseudouridine synthase, putative, expressed	1.24549	0.00214258
LOC_Os02g31100.1 protein	LITAF-domain-containing protein, putative, expressed	1.42273	2.8e-05
LOC_Os02g31160.1 protein	transcription factor, putative, expressed	1.33582	0.000198223
LOC_Os02g31220.1 protein	expressed protein	1.65899	9.55e-07
LOC_Os02g31290.2 protein	AML1, putative, expressed	1.53343	1.03e-05
LOC_Os02g31874.1 protein	DUF803 domain containing, putative, expressed	1.19439	0.00740491
LOC_Os02g31960.1 protein	ATP/GTP binding protein, putative, expressed	1.02741	0.631394
LOC_Os02g32030.1 protein	elongation factor, putative, expressed	2.09533	2.14e-07
LOC_Os02g32120.1 protein	cytochrome b-c1 complex subunit Rieske, mitochondrial precursor, putative, expressed	1.583	1.35e-06
LOC_Os02g32160.1 protein	copine, putative, expressed	1.29132	0.000793232
LOC_Os02g32200.1 protein	thioesterase family protein, putative, expressed	2.21638	4.74e-07
LOC_Os02g32350.2 protein	TUDOR protein with multiple SNc domains, putative, expressed	1.64683	1.15e-06
LOC_Os02g32370.1 protein	inositol hexaphosphate kinase, putative, expressed	1.64876	4.67e-06
LOC_Os02g32430.1 protein	WD domain, G-beta repeat domain containing protein, expressed	1.31918	3.66e-05
LOC_Os02g32460.1 protein	ThiF family domain containing protein, putative, expressed	1.4161	3.64e-06
LOC_Os02g32490.1 protein	AMP-binding enzyme, putative, expressed	1.5781	6.24e-06
LOC_Os02g32530.1 protein	SAM domain family protein, expressed	1.4961	4.64e-06
LOC_Os02g32530.2 protein	SAM domain family protein, expressed	1.3426	2.57e-05
LOC_Os02g32660.1 protein	1,4-alpha-glucan-branching enzyme, chloroplast precursor, putative, expressed	0.910428	0.0247658
LOC_Os02g32690.1 protein	pleiotropic drug resistance protein 15, putative, expressed	1.32213	0.00278764
LOC_Os02g32730.1 protein	neutral/alkaline invertase, putative, expressed	1.31462	0.000241995
LOC_Os02g32760.1 protein	60S acidic ribosomal protein, putative, expressed	2.45094	2.24e-07
LOC_Os02g32780.1 protein	pentatricopeptide, putative, expressed	1.34141	0.000539834
LOC_Os02g32814.1 protein	heavy metal-associated domain containing protein, expressed	3.06094	1.18e-07
LOC_Os02g32930.1 protein	bile acid sodium symporter, putative, expressed	0.681179	1.16e-05
LOC_Os02g32950.1 protein	RCN2 Centroradialis-like1 homologous to TFL1 gene; contains Pfam profile PF01161: Phosphatidylethanolamine-binding protein, expressed	1.50514	3.76e-06
LOC_Os02g32970.1 protein	hydrolase, alpha/beta fold family protein, putative, expressed	1.7929	2.61e-06
LOC_Os02g32980.1 protein	Cupin domain containing protein, expressed	1.87326	7.57e-07
LOC_Os02g32990.1 protein	expressed protein	1.91878	4.32e-06
LOC_Os02g33010.1 protein	expressed protein	0.78173	0.000170157
LOC_Os02g33020.1 protein	SOUL heme-binding protein, putative, expressed	0.800419	0.00981595
LOC_Os02g33070.1 protein	expressed protein	3.25455	4.78e-07
LOC_Os02g33080.1 protein	N-carbamoylputrescine amidase, putative, expressed	1.79767	6.96e-07
LOC_Os02g33110.1 protein	glycosyl hydrolases, putative, expressed	1.1019	0.0361239
LOC_Os02g33140.1 protein	ribosomal protein, putative, expressed	1.66215	6.46e-07
LOC_Os02g33180.1 protein	rar1, putative, expressed	2.02671	1.29e-06
LOC_Os02g33320.3 protein	RNA recognition motif containing protein, putative, expressed	2.44675	3.11e-07
LOC_Os02g33380.1 protein	pectinesterase inhibitor domain containing protein, putative, expressed	1.31809	0.000596667
LOC_Os02g33450.1 protein	peroxiredoxin, putative, expressed	0.624008	9.05e-07
LOC_Os02g33490.1 protein	inorganic H+ pyrophosphatase, putative, expressed	1.82709	4.21e-06
LOC_Os02g33500.1 protein	threonyl-tRNA synthetase, putative, expressed	1.05477	0.171874
LOC_Os02g33550.1 protein	harpin-induced protein 1 domain containing protein, expressed	1.98763	3.54e-07
LOC_Os02g33600.1 protein	VQ domain containing protein, putative, expressed	1.79472	1.84e-06
LOC_Os02g33610.1 protein	metallo-beta-lactamase, putative, expressed	1.68482	1.81e-06
LOC_Os02g33710.1 protein	decarboxylase, putative, expressed	1.52437	6.89e-05
LOC_Os02g33730.1 protein	ubiquinol-cytochrome C reductase hinge protein, putative, expressed	1.73091	3.66e-05
LOC_Os02g33750.1 protein	transposon protein, putative, unclassified, expressed	1.33779	0.00788262
LOC_Os02g33820.1 protein	abscisic stress-ripening, putative, expressed	2.19172	1.72e-05
LOC_Os02g33860.1 protein	WD domain, G-beta repeat domain containing protein, expressed	1.40743	0.000372199
LOC_Os02g34490.1 protein	Leucine Rich Repeat family protein, expressed	1.02969	0.630693
LOC_Os02g34510.1 protein	vacuolar ATP synthase, putative, expressed	1.53458	2.59e-06
LOC_Os02g34530.1 protein	OsPDIL5-3 protein disulfide isomerase PDIL5-3, expressed	1.52549	1.21e-05
LOC_Os02g34540.1 protein	tetratricopeptide repeat containing protein, putative, expressed	2.04122	1.85e-07
LOC_Os02g34560.1 protein	plant neutral invertase domain containing protein, expressed	1.87612	6.81e-07
LOC_Os02g34570.2 protein	exosome complex exonuclease, putative, expressed	1.90093	1.09e-06
LOC_Os02g34590.1 protein	transposon protein, putative, unclassified, expressed	1.62979	2.63e-06
LOC_Os02g34600.1 protein	#NAME?	1.38026	7.69e-05
LOC_Os02g34630.1 protein	MYB family transcription factor, putative, expressed	1.62113	1.07e-05
LOC_Os02g34680.1 protein	ZOS2-09 - C2H2 zinc finger protein, expressed	1.00231	0.968799
LOC_Os02g34810.1 protein	OsAPx8 - Thylakoid-bound Ascorbate Peroxidase encoding gene 5,8, expressed	0.449383	8.76e-08
LOC_Os02g34830.1 protein	tetratricopeptide repeat domain containing protein, expressed	1.7074	1.7e-06
LOC_Os02g34860.1 protein	Regulator of chromosome condensation domain containing protein, expressed	1.47922	6.48e-06
LOC_Os02g34884.1 protein	SacI homology domain containing protein, expressed	1.74556	1.16e-06
LOC_Os02g35039.1 protein	NAD dependent epimerase/dehydratase family protein, putative, expressed	2.13365	5.6e-07
LOC_Os02g35060.1 protein	RNA methyltransferase protein, putative, expressed	2.12034	2.98e-07
LOC_Os02g35070.1 protein	SPRY-domain containing protein, putative, expressed	1.4895	8.94e-06
LOC_Os02g35090.1 protein	expressed protein	0.832513	0.00313704
LOC_Os02g35130.2 protein	AIG1, putative, expressed	2.07647	5.43e-07
LOC_Os02g35160.1 protein	ligatin, putative, expressed	2.22652	1.55e-07
LOC_Os02g35170.1 protein	uncharacterized oxidoreductase yoxD, putative, expressed	1.10748	0.031581
LOC_Os02g35180.1 protein	OsRR2 type-A response regulator, expressed	1.05433	0.744854
LOC_Os02g35200.1 protein	VP15, putative, expressed	1.46201	9.92e-06
LOC_Os02g35315.1 protein	expressed protein	1.32199	0.000306967
LOC_Os02g35320.1 protein	expressed protein	1.02574	0.562655
LOC_Os02g35470.1 protein	calmodulin binding protein, putative, expressed	1.26955	7.68e-05
LOC_Os02g35500.1 protein	NAD binding domain of 6-phosphogluconate dehydrogenase containing protein, expressed	1.03129	0.35824
LOC_Os02g35590.1 protein	glutathione S-transferase, putative, expressed	1.29399	4.99e-05
LOC_Os02g35620.1 protein	expressed protein	1.26902	5.56e-05
LOC_Os02g35630.1 protein	AAA family ATPase, putative, expressed	1.10037	0.0195331
LOC_Os02g35640.1 protein	SFT2, putative, expressed	1.44384	0.00339536
LOC_Os02g35690.1 protein	transcription factor like protein, putative, expressed	1.32233	8.09e-05
LOC_Os02g35700.1 protein	nucleoside diphosphate kinase, putative, expressed	1.57906	6.19e-06
LOC_Os02g35750.2 protein	pentatricopeptide repeat domain containing protein, putative, expressed	1.50348	3.62e-05
LOC_Os02g35900.1 protein	thioredoxin, putative, expressed	0.909217	0.022748
LOC_Os02g35940.1 protein	gibberellin receptor GID1L2, putative, expressed	1.62398	1.71e-06
LOC_Os02g35950.1 protein	RNA recognition motif containing protein, putative, expressed	2.50722	6.64e-08
LOC_Os02g36150.1 protein	cytochrome P450, putative, expressed	1.45189	1.54e-05
LOC_Os02g36210.1 protein	ent-kaurene synthase, chloroplast precursor, putative, expressed	1.48538	0.00946716
LOC_Os02g36340.1 protein	riboflavin biosynthesis protein ribAB, chloroplast precursor, putative, expressed	1.4001	0.000136924
LOC_Os02g36380.1 protein	FAD binding domain of DNA photolyase domain containing protein, expressed	1.31548	0.000641924
LOC_Os02g36390.1 protein	nucleotide-sugar transporter family protein, putative, expressed	1.78124	6.88e-05
LOC_Os02g36530.1 protein	expressed protein	4.22289	2.13e-07
LOC_Os02g36570.1 protein	ABC1 family domain containing protein, putative, expressed	0.862789	0.0075477
LOC_Os02g36710.1 protein	SET, putative, expressed	2.08586	1.74e-07
LOC_Os02g36850.1 protein	oxygen evolving enhancer protein 3, identical, putative, expressed	0.825282	0.000273603
LOC_Os02g36974.4 protein	14-3-3 protein, putative, expressed	1.54494	2.93e-06
LOC_Os02g37000.1 protein	mitochondrial prohibitin complex protein 1, putative, expressed	1.69011	2.35e-06
LOC_Os02g37050.1 protein	phosphatidylinositolglycan class N family protein, expressed	1.55515	1.67e-06
LOC_Os02g37060.1 protein	photosystem II 5 kDa protein, chloroplast precursor, putative, expressed	0.258108	3.51e-08
LOC_Os02g37080.1 protein	ASC1, putative, expressed	1.57005	1.89e-06
LOC_Os02g37150.1 protein	expressed protein	2.39032	8.24e-08
LOC_Os02g37300.1 protein	heavy metal associated domain containing protein, expressed	1.84549	4.14e-07
LOC_Os02g37420.1 protein	ras-related protein, putative, expressed	1.38844	1.28e-05
LOC_Os02g37430.1 protein	LSM domain containing protein, expressed	1.19353	0.00924844
LOC_Os02g37470.1 protein	tetratricopeptide repeat containing protein, putative, expressed	1.49823	1.82e-06
LOC_Os02g37590.1 protein	glycerophosphoryl diester phosphodiesterase family protein, putative, expressed	1.59328	3.03e-06
LOC_Os02g37654.1 protein	lecithin:cholesterol acyltransferase, putative, expressed	1.52385	3.68e-06
LOC_Os02g37690.1 protein	UDP-glucoronosyl and UDP-glucosyl transferase, putative, expressed	1.68012	1.74e-06
LOC_Os02g37700.1 protein	lecithin:cholesterol acyltransferase, putative, expressed	1.52897	4.14e-05
LOC_Os02g37800.1 protein	lecithin:cholesterol acyltransferase, putative, expressed	0.888911	0.0811194
LOC_Os02g37862.1 protein	60S ribosomal protein L6, putative, expressed	2.07559	1.39e-07
LOC_Os02g37870.1 protein	Brix domain containing protein, putative, expressed	2.82452	4.31e-08
LOC_Os02g37880.1 protein	cyclin G-associated kinase, putative, expressed	1.49014	3.05e-06
LOC_Os02g37910.1 protein	expressed protein	1.50149	2.47e-06
LOC_Os02g38020.1 protein	inorganic phosphate transporter 2-1, chloroplast precursor, putative, expressed	0.65489	3.36e-06
LOC_Os02g38050.1 protein	joka2, putative, expressed	1.90455	1.55e-06
LOC_Os02g38080.2 protein	protein kinase domain containing protein, expressed	1.79226	7.07e-07
LOC_Os02g38190.1 protein	expressed protein	2.70496	5.28e-08
LOC_Os02g38200.1 protein	dehydrogenase, putative, expressed	1.71185	9.23e-06
LOC_Os02g38210.1 protein	elongation factor Tu, putative, expressed	0.842535	0.00178299
LOC_Os02g38220.1 protein	eukaryotic translation initiation factor 4B, putative, expressed	1.92426	5.65e-06
LOC_Os02g38240.1 protein	rhodanese family protein, putative, expressed	0.685546	9.88e-06
LOC_Os02g38300.1 protein	SNF7 domain containing protein, putative, expressed	1.47894	7.65e-06
LOC_Os02g38340.1 protein	actin, putative, expressed	2.57983	9.01e-08
LOC_Os02g38430.1 protein	steroid nuclear receptor, ligand-binding, putative, expressed	1.22363	0.00446186
LOC_Os02g38440.1 protein	oxidoreductase, short chain dehydrogenase/reductase family, putative, expressed	1.84491	9.16e-07
LOC_Os02g38480.1 protein	expressed protein	1.42377	2.79e-05
LOC_Os02g38680.1 protein	EMB2423, putative, expressed	1.81108	7.69e-06
LOC_Os02g38810.1 protein	26S proteasome non-ATPase regulatory subunit 6, putative, expressed	2.14825	6.05e-07
LOC_Os02g38820.1 protein	expressed protein	0.955779	0.182588
LOC_Os02g38840.2 protein	glucose-6-phosphate 1-dehydrogenase, cytoplasmic isoform, putative, expressed	1.54607	3.49e-06
LOC_Os02g38900.1 protein	cytosolic Fe-S cluster assembling factor NBP35, putative, expressed	1.53701	2.83e-06
LOC_Os02g38920.1 protein	glyceraldehyde-3-phosphate dehydrogenase, putative, expressed	2.23025	7.23e-08
LOC_Os02g38980.1 protein	bromodomain domain containing protein, expressed	1.63094	3.5e-06
LOC_Os02g39030.1 protein	transmembrane protein 17, putative, expressed	4.17106	1.06e-07
LOC_Os02g39040.1 protein	mTERF domain containing protein, expressed	1.16443	0.00567735
LOC_Os02g39050.1 protein	pre-mRNA-splicing factor ISY1, putative, expressed	1.63276	1.38e-06
LOC_Os02g39060.1 protein	RNA recognition motif containing protein, putative, expressed	1.53563	0.00113464
LOC_Os02g39140.1 protein	helix-loop-helix DNA-binding domain containing protein, expressed	1.61646	2.27e-06
[truncated: 7,212 more rows]
